# Supplementary material
Source: PubMed Central journal article supplement (PMC4768685)

Supplementary Materials for

**Catalyst-Free Synthesis of Borylated Lactones from Esters via Electrophilic Oxyboration**

Darius J. Faizi, Adena Issaian, Ashlee J. Davis, and Suzanne A. Blum\*

*Department of Chemistry, University of California, Irvine, California 92697-2025*

Email: blums@uci.edu

|                                                                                                                       |    |
|-----------------------------------------------------------------------------------------------------------------------|----|
| I. General Methods .....                                                                                              | 2  |
| II. Synthetic Procedures .....                                                                                        | 3  |
| A. Preparation of Ester Substrates <b>1a–1p</b> .....                                                                 | 3  |
| B. Boron Electrophile Screen .....                                                                                    | 11 |
| C. Reaction Condition Optimization.....                                                                               | 12 |
| D. Synthesis of <i>O</i> -Alkyl Esters and Screen .....                                                               | 13 |
| E. Synthesis and Isolation of Carboxyboration Products <b>3a–3p</b> .....                                             | 15 |
| F. Multigram Scale Preparation of <b>3g</b> .....                                                                     | 26 |
| G. Synthesis of <b>12</b> .....                                                                                       | 27 |
| H. Suzuki Cross-Coupling of <b>3g</b> to Generate <b>13</b> .....                                                     | 27 |
| I. Synthesis of Borylated Isoxazole Product <b>15</b> .....                                                           | 28 |
| J. Procedure for <sup>1</sup> H NMR observation of the rate of demethylation of methyl 2-iodobenzoate <b>10</b> ..... | 29 |
| III. References.....                                                                                                  | 30 |
| IV. NMR Spectra .....                                                                                                 | 31 |

## I. General Methods

All chemicals were used as received from commercial sources unless otherwise noted. Triethylamine, acetonitrile, toluene, tetrahydrofuran, and dichloromethane were purified by passage through an alumina column under argon pressure on a push-still solvent system. Toluene-*d*<sub>8</sub> was dried over CaH<sub>2</sub>, degassed using three freeze-pump-thaw cycles, and vacuum transferred prior to use. All manipulations were conducted using standard Schlenk techniques unless otherwise specified. Analytical thin layer chromatography (TLC) was performed using Merck F<sub>250</sub> plates. Plates were visualized under UV irradiation (254 nm) and/or using a basic aqueous solution of potassium permanganate. Flash chromatography was conducted using a Teledyne Isco Combiflash® Rf 200 Automated Flash Chromatography System, and Teledyne Isco Redisep® 35–70 μm silica gel. All proton and carbon nuclear magnetic resonance (<sup>1</sup>H and <sup>13</sup>C NMR) spectra were recorded on a Bruker DRX-400 spectrometer, Bruker DRX-500 spectrometer outfitted with a cryoprobe, or a Bruker AVANCE-600 spectrometer. All boron nuclear magnetic resonance (<sup>11</sup>B NMR) spectra were recorded on a Bruker AVANCE-600 spectrometer. All fluorine nuclear magnetic resonance (<sup>19</sup>F NMR) spectra were recorded on a Bruker DRX-400. All chemical shifts (δ) are reported in parts per million (ppm) downfield of tetramethylsilane, and referenced to the residual protiated solvent peak (δ = 7.26 ppm for CDCl<sub>3</sub>, δ = 2.08 ppm for *d*<sub>8</sub>-toluene, δ = 2.05 ppm for *d*<sub>6</sub>-acetone, or δ = 1.94 ppm for CD<sub>3</sub>CN in <sup>1</sup>H NMR spectroscopy experiments; δ = 77.2 ppm for CDCl<sub>3</sub>, δ = 29.8 ppm for *d*<sub>6</sub>-acetone, δ = 20.4 ppm for *d*<sub>8</sub>-toluene, or δ = 1.34 ppm for CD<sub>3</sub>CN in <sup>13</sup>C NMR spectroscopy experiments). <sup>11</sup>B and <sup>19</sup>F NMR spectroscopy experiments are referenced to the absolute frequency of 0 ppm in the <sup>1</sup>H dimension according to the Xi scale. High-resolution mass spectrometry data were obtained at the University of California, Irvine.

## II. Synthetic Procedures

### A. Preparation of Esters 1a-1p

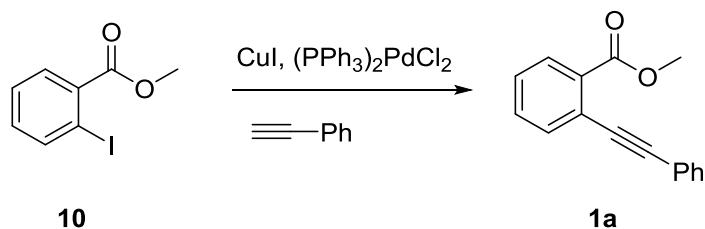

**Methyl 2-(phenylethynyl)benzoate (1a).** A flask was charged with compound **10** (3.0 mL, 20. mmol, 1.0 equiv),  $(\text{PPh}_3)_2\text{PdCl}_2$  (0.28 g, 0.40 mmol, 0.020 equiv), and  $\text{CuI}$  (0.15 g, 0.80 mmol, 0.040 equiv). The flask was then evacuated and refilled with  $\text{N}_2$  three times before 40 mL of acetonitrile and  $\text{Et}_3\text{N}$  (22 mL, 160 mmol, 8.0 equiv) were added. Phenylacetylene (2.4 mL, 22 mmol, 1.1 equiv) was then syringed into the reaction mixture which stirred for 18 h under dynamic  $\text{N}_2$ . At this time, analysis by TLC (5% EtOAc/hexanes) indicated full consumption of starting material. The reaction mixture was diluted with 200 mL EtOAc and washed with  $\text{NH}_4\text{Cl}$  (1  $\times$  45 mL), water (1  $\times$  45 mL), brine (1  $\times$  45 mL), dried over  $\text{Na}_2\text{SO}_4$ , filtered, and concentrated in vacuo. The resulting oily residue was purified by column chromatography using an elution gradient from 100% hexanes to 5% EtOAc/hexanes. Product-containing fractions were combined and concentrated in vacuo, and volatiles were removed at c.a. 10 mTorr for 18 h to afford **1a** as a light yellow oil (4.2 g, 88% yield).  $^1\text{H NMR}$  ( $\text{CDCl}_3$ , 600 MHz):  $\delta$  7.98 (d,  $J = 7.6$  Hz, 1H), 7.65 (d,  $J = 7.3$  Hz, 1H), 7.59-7.57 (m, 2H), 7.59-7.57 (m, 1H), 7.40-7.35 (m, 4H), 3.97 (s, 3H). This spectrum is in agreement with previously reported spectral data.<sup>1</sup>

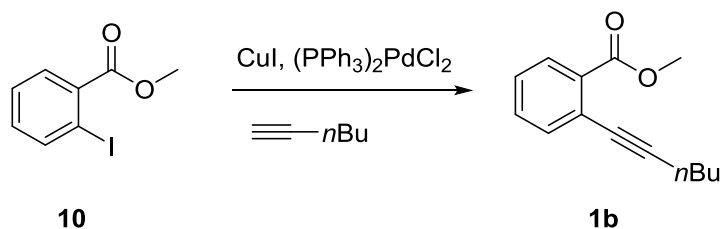

**Methyl 2-(hex-1-yn-1-yl)benzoate (1b).** A flask was charged with compound **10** (0.73 mL, 5.0 mmol, 1.0 equiv),  $(\text{PPh}_3)_2\text{PdCl}_2$  (0.070 g, 0.10 mmol, 0.020 equiv), and  $\text{CuI}$  (0.038 g, 0.20 mmol, 0.040 equiv). The flask was then evacuated and refilled with  $\text{N}_2$  three times before 10 mL of acetonitrile and  $\text{Et}_3\text{N}$  (5.6 mL, 40. mmol, 8.0 equiv) were added. 1-Hexyne (0.63 mL, 5.5 mmol, 1.1 equiv) was then syringed into the reaction mixture, which then stirred for 18 h under dynamic  $\text{N}_2$ . At this time, analysis by TLC (10% EtOAc/hexanes) indicated full consumption of starting material. The reaction mixture was diluted with 100 mL EtOAc and washed with  $\text{NH}_4\text{Cl}$  (1  $\times$  25 mL), water (1  $\times$  25 mL), brine (1  $\times$  25 mL), dried over  $\text{Na}_2\text{SO}_4$ , filtered, and concentrated in vacuo. The resulting oily residue was purified by column chromatography using an elution gradient from 100% hexanes to 10% EtOAc/hexanes. Product-containing fractions were combined and concentrated in vacuo, and volatiles were removed at c.a. 10 mTorr for 18 h to afford **1b** as a light yellow oil (0.80 g, 74% yield).  $^1\text{H NMR}$  ( $\text{CDCl}_3$ , 600 MHz):  $\delta$  7.88 (d  $J = 7.9$  Hz, 1H), 7.51 (d,  $J = 7.8$  Hz, 1H), 7.41 (td,  $J = 7.6$  Hz, 1H), 7.30 (t,  $J = 7.6$  Hz, 1H), 3.91 (s, 3H),

2.48 (t,  $J = 7.1$  Hz, 2H), 1.64-1.60 (m, 2H), 1.54-1.48 (m, 2H), 0.96 (t,  $J = 7.3$  Hz, 3H). This spectrum is in agreement with previously reported spectral data.<sup>2</sup>

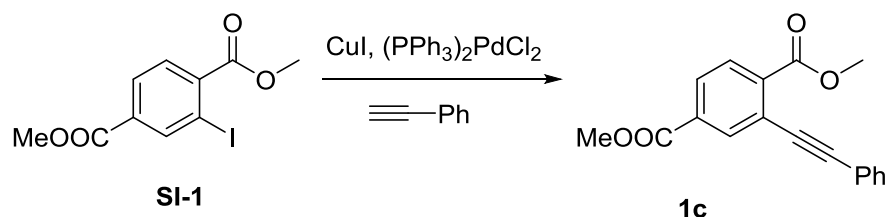

**Methyl 4-acetoxy-2-(phenylethynyl)benzoate (1c).** A flask was charged with  $(\text{PPh}_3)_2\text{PdCl}_2$  (0.022 g, 0.030 mmol, 0.020 equiv), and CuI (0.011 g, 0.060 mmol, 0.040 equiv). The flask was then evacuated and refilled with  $\text{N}_2$  three times before 4 mL of  $\text{Et}_3\text{N}$  were added. The reaction mixture was then sparged for 5 minutes before compound **SI-1** (0.50 g, 1.6 mmol, 1.0 equiv) was added. Phenylacetylene (0.21 mL, 1.9 mmol, 1.2 equiv) was then added via syringe, and the reaction mixture was heated to 55 °C in an oil bath and stirred for 16 h under dynamic  $\text{N}_2$ . At this time, analysis by TLC (20% EtOAc/hexanes) indicated full consumption of starting material. The reaction mixture was diluted with 100 mL DCM and washed with water ( $1 \times 25$  mL), brine ( $1 \times 25$  mL), dried over  $\text{Na}_2\text{SO}_4$ , filtered, and concentrated in vacuo. The resulting oily residue was purified by column chromatography using an elution gradient from 100% hexanes to 20% EtOAc/hexanes. Product-containing fractions were combined and concentrated in vacuo, and volatiles were removed at c.a. 10 mTorr for 18 h to afford **1c** as a yellow solid (0.44 g, 95% yield).  $^1\text{H}$  NMR ( $\text{CDCl}_3$ , 600 MHz):  $\delta$  8.26 (s, 1H), 8.00-7.96 (m, 2H), 7.57-7.56 (m, 2H), 7.35-7.34 (m, 3H), 3.96 (s, 3H), 3.92 (s, 3H). This spectrum is in agreement with previously reported spectral data.<sup>2</sup>

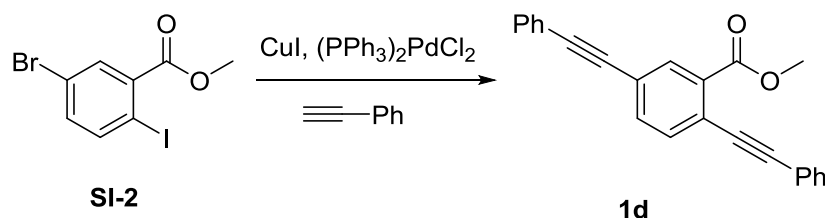

**Methyl 2,5-bis(phenylethynyl)benzoate (1d)** A flask was charged with  $(\text{PPh}_3)_2\text{PdCl}_2$  (0.017 g, 0.024 mmol, 0.040 equiv), and CuI (0.016 g, 0.12 mmol, 0.020 equiv). The flask was then evacuated and refilled with  $\text{N}_2$  three times before 4 mL of  $\text{Et}_3\text{N}$  were added. The reaction mixture was then sparged for 5 min before **SI-2** (2.00 g, 5.87 mmol, 1.00 equiv) was added. Phenylacetylene (0.70 mL, 6.5 mmol, 1.1 equiv) was then added via syringe, and the reaction mixture was heated to 55 °C in an oil bath and stirred for 16 h under dynamic  $\text{N}_2$ . At this time, analysis by TLC (5% EtOAc/hexanes) indicated full consumption of starting material. The reaction mixture was diluted with 100 mL DCM and washed with water ( $1 \times 25$  mL), brine ( $1 \times 25$  mL), dried over  $\text{Na}_2\text{SO}_4$ , filtered, and concentrated in vacuo. The resulting oily residue was purified by column chromatography using an elution gradient from 100% hexanes to 5% EtOAc/hexanes. Product-containing fractions were combined and concentrated in vacuo, and volatiles were removed at c.a. 10 mTorr for 18 h to afford the minor product **1d** as a white solid

(0.17 g, 11% yield).  $^1\text{H}$  NMR ( $\text{CDCl}_3$ , 600 MHz):  $\delta$  8.15 (s, 1H), 7.60-7.54 (m, 4H), 7.38-7.36 (m, 6H), 4.0 (s, 3H). This spectrum is in agreement with previously reported spectral data.<sup>3</sup>

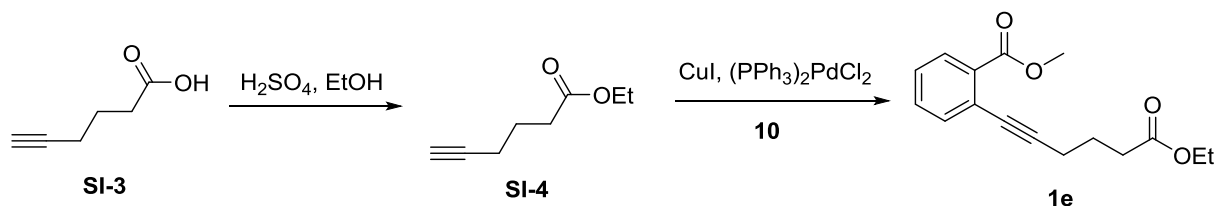

**Ethyl hex-5-ynoate (SI-4)** was prepared according to a literature procedure<sup>4</sup> in 87% yield.  $^1\text{H}$  NMR ( $\text{CDCl}_3$ , 600 MHz)  $\delta$  4.14 (q,  $J = 7.1$  Hz, 2H), 2.44 (t,  $J = 7.4$  Hz, 2H), 2.27 (dt,  $J = 7.0$ , 2.6 Hz, 2H), 1.97 (t,  $J = 2.6$  Hz, 1H), 1.85 (quin,  $J = 7.2$  Hz, 1H), 1.26 (t,  $J = 7.2$  Hz, 3H). This spectrum is in agreement with previously reported spectral data.

**Methyl 2-(6-ethoxy-6-oxohex-1-yn-1-yl)benzoate (1e)**. A flask was charged with compound **10** (0.50 g, 1.8 mmol, 1.0 equiv),  $(\text{PPh}_3)_2\text{PdCl}_2$  (0.038 g, 0.054 mmol, 0.030 equiv), and CuI (0.031 g, 0.16 mmol, 0.090 equiv). The flask was then evacuated and refilled with  $\text{N}_2$  three times before 4 mL of acetonitrile and  $\text{Et}_3\text{N}$  (0.25 mL, 1.8 mmol, 8.0 equiv) were added. Compound **SI-4** (0.38 g, 2.7 mmol, 1.5 equiv) was then syringed into the reaction mixture which stirred for 18 h under dynamic  $\text{N}_2$ . At this time, analysis by TLC (10% EtOAc/hexanes) indicated full consumption of starting material. The reaction mixture was diluted with 125 mL EtOAc and washed with  $\text{NH}_4\text{Cl}$  (1  $\times$  45 mL), water (1  $\times$  45 mL), brine (1  $\times$  45 mL), dried over  $\text{Na}_2\text{SO}_4$ , filtered, and concentrated in vacuo. The resulting oily residue was purified by column chromatography using an elution gradient from 100% hexanes to 10% EtOAc/hexanes. Product-containing fractions were combined and concentrated in vacuo, and volatiles were removed at c.a. 10 mTorr for 18 h to afford **1e** as a light yellow oil (0.42 g, 80% yield).

$^1\text{H}$  NMR ( $\text{CDCl}_3$ , 600 MHz):  $\delta$  7.88 (d,  $J = 7.8$  Hz, 1H), 7.50 (d,  $J = 7.6$  Hz, 1H), 7.42 (t,  $J = 7.3$  Hz, 1H), 7.31 (t,  $J = 7.3$  Hz, 1H), 4.13 (q,  $J = 7.2$  Hz, 2H), 3.91 (s, 3H), 2.56-2.52 (m, 4H), 1.95 (quin,  $J = 7.2$  Hz, 2H), 1.25 (t,  $J = 7.1$  Hz, 3H).

$^{13}\text{C}$  NMR ( $\text{CDCl}_3$ , 125 MHz):  $\delta$  173.3, 166.9, 134.3, 132.0, 131.6, 130.2, 127.4, 124.2, 94.4, 80.1, 60.4, 52.2, 33.2, 23.9, 23.5, 18.7, 14.3.

HRMS (ESI<sup>+</sup>): Calculated for  $\text{C}_{16}\text{H}_{18}\text{O}_4\text{Na}$  ( $[\text{M}+\text{Na}]^+$ ), 297.1103; found 297.1096.

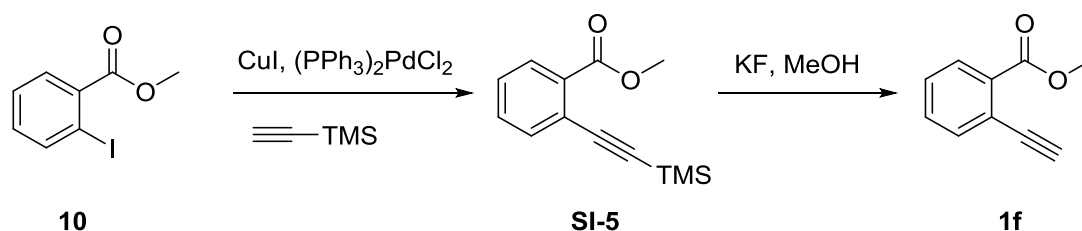

**Methyl 2-((trimethylsilyl)ethynyl)benzoate (SI-5)**. A flask was charged with compound **10** (5.2 mL, 38 mmol, 1.0 equiv),  $(\text{PPh}_3)_2\text{PdCl}_2$  (0.53 g, 1.5 mmol, 0.020 equiv), and CuI (0.29 g, 1.5 mmol, 0.040 equiv). The flask was then evacuated and refilled with  $\text{N}_2$  three times before 76 mL of acetonitrile and  $\text{Et}_3\text{N}$  (40 mL, 300 mmol, 8 equiv) were added. Trimethylsilyl acetylene

(5.9 mL, 42 mmol, 1.1 equiv) was then syringed into the reaction mixture which stirred for 18 h under dynamic N<sub>2</sub>. At this time, analysis by TLC (5% EtOAc/hexanes) indicated full consumption of starting material. The reaction mixture was diluted with 300 mL Et<sub>2</sub>O and washed with NH<sub>4</sub>Cl (1 × 50 mL), water (1 × 50 mL), brine (1 × 50 mL), dried over Na<sub>2</sub>SO<sub>4</sub>, filtered, and concentrated in vacuo. The resulting oily residue was purified by column chromatography using an elution gradient from 100% hexanes to 5% EtOAc/hexanes. Product-containing fractions were combined and concentrated in vacuo, and volatiles were removed at c.a. 10 mTorr for 18 h to afford **SI-5** as a yellow oil (7.0 g, 79% yield). <sup>1</sup>H NMR (CDCl<sub>3</sub>, 600 MHz): δ 7.90 (app d, *J* = 7.6 Hz, 1H), 7.58 (app d, *J* = 7.5 Hz, 1H), 7.44 (td, *J* = 7.6, 0.8 Hz, 1H), 7.36 (app t, *J* = 7.6 Hz, 1H), 3.92 (s, 3H), 0.27 (s, 9H). This spectrum is in agreement with previously reported spectral data.<sup>5</sup>

**Methyl 2-ethynylbenzoate (1f)**. A flask was charged with compound **SI-5** (2.9 g, 13 mmol, 1.0 equiv), 63 mL methanol, and potassium fluoride (2.6 g, 44 mmol, 3.5 equiv). The flask was then sealed with a ground glass stopper and heated to 40 °C while stirring for 3 h. At this time, analysis by TLC (10% EtOAc/hexanes) indicated full consumption of starting material. The reaction mixture was diluted with 200 mL Et<sub>2</sub>O and washed with water (4 × 50 mL), brine (1 × 50 mL), dried over Na<sub>2</sub>SO<sub>4</sub>, filtered, and concentrated in vacuo at ~10 Torr and 25 °C [warning: product is volatile], yielding **1f** as a dark yellow/red liquid (1.7 g, 84% yield). <sup>1</sup>H NMR (CDCl<sub>3</sub>, 600 MHz): δ 7.94 (d, *J* = 7.8 Hz, 1H), 7.62 (d, *J* = 7.7 Hz, 1H), 7.47 (t, *J* = 7.6 Hz, 1H), 7.40 (t, *J* = 7.6 Hz, 1H), 3.93 (s, 3H), 3.40 (s, 1H). This spectrum is in agreement with previously reported spectral data.<sup>6</sup>

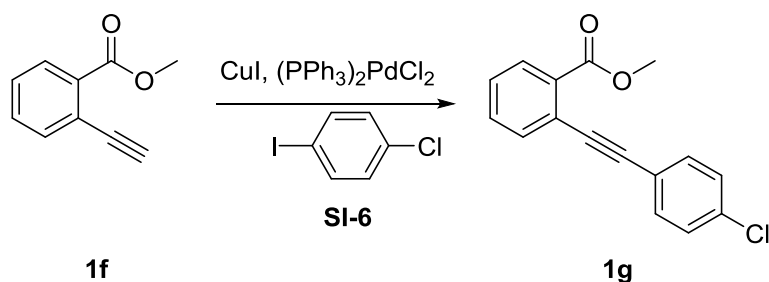

**Methyl 2-((4-chlorophenyl)ethynyl)benzoate (1g)**. A flask was charged with compound **SI-6** (0.36 g, 1.5 mmol, 1.0 equiv), (PPh<sub>3</sub>)<sub>2</sub>PdCl<sub>2</sub> (0.021 g, 0.030 mmol, 0.020 equiv), and CuI (0.012 g, 0.060 mmol, 0.040 equiv). The flask was then evacuated and refilled with N<sub>2</sub> three times before 3 mL of acetonitrile and Et<sub>3</sub>N (1.7 mL, 12 mmol, 8.0 equiv) were added. Compound **1f** (0.27 g, 1.7 mmol, 1.1 equiv) was then syringed into the reaction mixture which stirred for 18 h under dynamic N<sub>2</sub>. At this time, analysis by TLC (10% EtOAc/hexanes) indicated full consumption of starting material. The reaction mixture was diluted with 150 mL Et<sub>2</sub>O and washed with NH<sub>4</sub>Cl (1 × 40 mL), water (1 × 40 mL), brine (1 × 40 mL), dried over Na<sub>2</sub>SO<sub>4</sub>, filtered, and concentrated in vacuo. The resulting oily residue was purified by column chromatography using an elution gradient from 100% hexanes to 10% EtOAc/hexanes. Product-containing fractions were combined and concentrated in vacuo, and volatiles were removed at c.a. 10 mTorr for 18 h to afford **1g** as a light yellow liquid that solidified upon standing at room temperature (0.34 g, 84% yield). <sup>1</sup>H NMR (CDCl<sub>3</sub>, 500 MHz): δ 7.99 (dd, *J* = 7.9, 1.0 Hz, 1H),

7.64 (dd,  $J = 7.7, 0.9$  Hz, 1H), 7.52-7.49 (m, 3H), 7.40 (td,  $J = 7.7, 1.3$  Hz, 1H), 7.35-7.33 (m, 2H), 3.96 (s, 3H). This spectrum is in agreement with previously reported spectral data.<sup>7</sup>

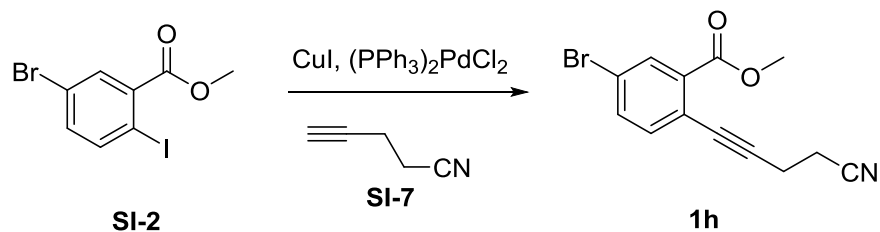

**Methyl 5-bromo-2-(4-cyanobut-1-yn-1-yl)benzoate (1h).** A flask was charged with compound **SI-2** (0.34 g, 1.0 mmol, 1.0 equiv),  $(\text{PPh}_3)_2\text{PdCl}_2$  (0.014 g, 0.020 mmol, 0.020 equiv), and CuI (0.008 g, 0.04 mmol, 0.04 equiv). The flask was then evacuated and refilled with  $\text{N}_2$  three times before 2 mL of acetonitrile and  $\text{Et}_3\text{N}$  (1.1 mL, 8.0 mmol, 8.0 equiv) were added. Compound **SI-7** (0.10 mL, 1.1 mmol, 1.1 equiv) was then syringed into the reaction mixture which stirred for 18 h under dynamic  $\text{N}_2$ . At this time, analysis by TLC (20% EtOAc/hexanes) indicated full consumption of starting material. The reaction mixture was diluted with 150 mL EtOAc and washed with  $\text{NH}_4\text{Cl}$  ( $1 \times 25$  mL), water ( $1 \times 25$  mL), brine ( $1 \times 25$  mL), dried over  $\text{Na}_2\text{SO}_4$ , filtered, and concentrated in vacuo. The resulting oily residue was purified by column chromatography using an elution gradient from 100% hexanes to 20% EtOAc/hexanes. Product-containing fractions were combined and concentrated in vacuo, and volatiles were removed at c.a. 10 mTorr for 18 h to afford **1h** as a light yellow solid (0.25 g, 86% yield).

$^1\text{H}$  NMR ( $\text{CDCl}_3$ , 500 MHz):  $\delta$  8.06 (s, 1H), 7.57 (d,  $J = 8.3$  Hz, 1H), 7.40 (d,  $J = 8.3$  Hz, 1H), 3.92 (s, 3H), 2.84 (t,  $J = 7.2$  Hz, 2H), 2.69 (t,  $J = 7.2$  Hz, 2H).

$^{13}\text{C}$  NMR ( $\text{CDCl}_3$ , 125 MHz):  $\delta$  165.2, 135.7, 134.9, 133.41, 133.38, 122.3, 122.0, 118.3, 91.7, 81.0, 52.6, 17.5, 17.2.

HRMS ( $\text{CI}^+$ ): Calculated for  $\text{C}_{13}\text{H}_{14}\text{BrN}_2\text{O}_2$  ( $[\text{M}+\text{NH}_4]^+$ ), 309.0239; found 309.0230.

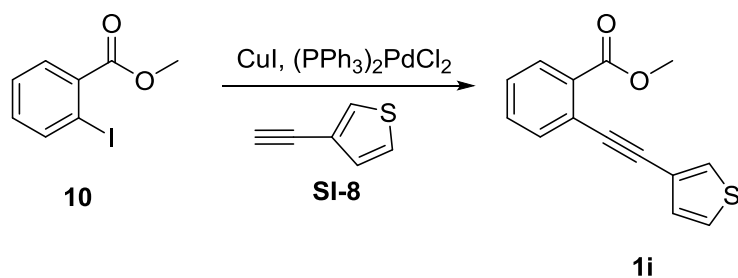

**Methyl 2-(thiophen-3-ylethynyl)benzoate (1i).** A flask was charged with compound **10** (0.22 mL, 1.5 mmol, 1.0 equiv),  $(\text{PPh}_3)_2\text{PdCl}_2$  (0.021 g, 0.030 mmol, 0.020 equiv), and CuI (0.011 g, 0.060 mmol, 0.040 equiv). The flask was then evacuated and refilled with  $\text{N}_2$  three times before 3 mL of acetonitrile and  $\text{Et}_3\text{N}$  (1.7 mL, 12 mmol, 8.0 equiv) were added. Compound **SI-8** (0.17 mL, 1.7 mmol, 1.1 equiv) was then syringed into the reaction mixture, which was then stirred for 18 h under dynamic  $\text{N}_2$ . At this time, analysis by TLC (20% EtOAc/hexanes) indicated full consumption of starting material. The reaction mixture was diluted with 150 mL EtOAc and

washed with NH<sub>4</sub>Cl (1 × 25 mL), water (1 × 25 mL), brine (1 × 25 mL), dried over Na<sub>2</sub>SO<sub>4</sub>, filtered, and concentrated in vacuo. The resulting oily residue was purified by column chromatography using an elution gradient from 100% hexanes to 20% EtOAc/hexanes. Product-containing fractions were combined and concentrated in vacuo, and volatiles were removed at c.a. 10 mTorr for 18 h to afford **1i** as a light yellow solid (0.37 g, 78% yield).

<sup>1</sup>H NMR (CDCl<sub>3</sub>, 600 MHz): δ 7.95 (d, *J* = 7.8 Hz, 1H), 7.61 (d, *J* = 7.6 Hz, 1H), 7.58-7.56 (m, 1H), 7.45 (td, *J* = 7.6, 1.3 Hz, 1H), 7.34 (td, *J* = 7.6, 1.3 Hz, 1H), 7.29 (dd, *J* = 4.9, 3.0 Hz, 1H), 7.23 (app. d, *J* = 5.0 Hz, 1H), 3.93 (s, 3H).

<sup>13</sup>C NMR (CDCl<sub>3</sub>, 125 MHz): δ 166.7, 134.0, 131.8, 131.7, 130.5, 130.0, 129.2, 127.9, 125.5, 123.8, 122.5, 89.7, 87.9, 52.2.

HRMS (CI<sup>+</sup>): Calculated for C<sub>14</sub>H<sub>10</sub>SO<sub>2</sub> ([M]<sup>+</sup>), 242.0401; found 242.0390.

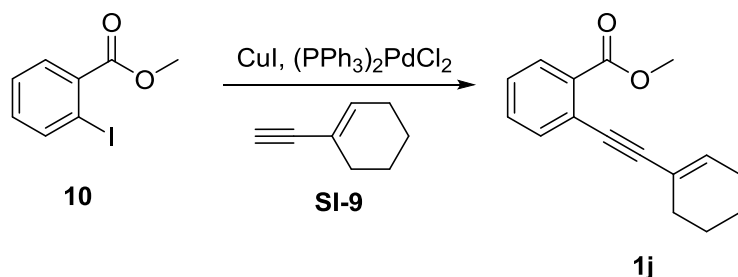

**methyl 2-(cyclohex-1-en-1-ylethynyl)benzoate (1j).** A flask was charged with compound **10** (0.22 mL, 1.5 mmol, 1.0 equiv), (PPh<sub>3</sub>)<sub>2</sub>PdCl<sub>2</sub> (0.021 g, 0.030 mmol, 0.020 equiv), and CuI (0.011 g, 0.060 mmol, 0.040 equiv). The flask was then evacuated and refilled with N<sub>2</sub> three times before 3 mL of acetonitrile and Et<sub>3</sub>N (1.7 mL, 12 mmol, 8.0 equiv) were added. Compound **SI-9** (0.20 mL, 1.7 mmol, 1.1 equiv) was then syringed into the reaction mixture which stirred for 18 h under dynamic N<sub>2</sub>. At this time, analysis by TLC (10% EtOAc/hexanes) indicated full consumption of starting material. The reaction mixture was diluted with 150 mL Et<sub>2</sub>O and washed with NH<sub>4</sub>Cl (1 × 25 mL), water (1 × 25 mL), brine (1 × 25 mL), dried over Na<sub>2</sub>SO<sub>4</sub>, filtered, and concentrated in vacuo. The resulting oily residue was purified by column chromatography using an elution gradient from 100% hexanes to 5% EtOAc/hexanes. Product-containing fractions were combined and concentrated in vacuo, and volatiles were removed at c.a. 10 mTorr for 18 h to afford **1j** as a yellow oil (0.35 g, 96% yield). <sup>1</sup>H NMR (CDCl<sub>3</sub>, 600 MHz): δ 7.92 (dd, *J* = 7.9, 1.1 Hz, 1H), 7.52 (dd, *J* = 7.7, 1.0 Hz, 1H), 7.43 (td, *J* = 7.6, 1.3 Hz, 1H), 7.31 (td, *J* = 7.7, 1.2 Hz, 1H), 6.28 – 6.26 (m, 1H), 3.92 (s, 3H), 2.28 – 2.25 (m, 2H), 2.18 – 2.14 (m, 2H), 1.71-1.67 (m, 2H), 1.64-1.61 (m, 2H). This spectrum is in agreement with previously reported spectral data.<sup>8</sup>

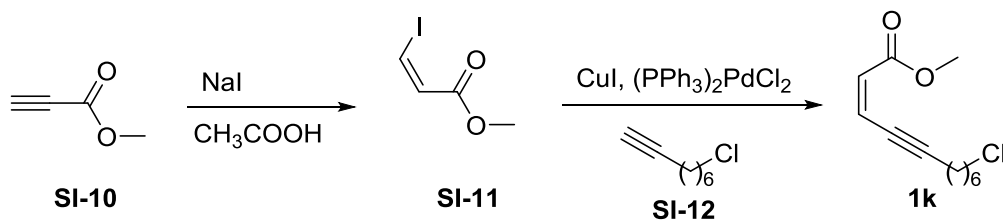



**Methyl (Z)-3-iodoacrylate (SI-11)** was prepared according to a literature procedure<sup>9</sup> in 75% yield. <sup>1</sup>H NMR (CDCl<sub>3</sub>, 600 MHz): δ 7.47 (d, *J* = 8.9 Hz, 1H), 6.91 (d, *J* = 9.0 Hz, 1H), 3.79 (s, 3H). This spectrum is in agreement with previously reported spectral data.

**Methyl (Z)-11-chloroundec-2-en-4-ynoate (1k)**. This procedure was performed in a N<sub>2</sub>-filled glove box. A 20 mL vial was charged with compound **SI-11** (0.42 g, 2.0 mmol, 1.0 equiv), (PPh<sub>3</sub>)<sub>2</sub>PdCl<sub>2</sub> (0.105 mg, 0.150 mmol, 0.0750 equiv), CuI (0.014 g, 0.074 mmol, 0.037 equiv), and a stir bar. 5 mL of Et<sub>3</sub>N were added. Compound **SI-12** (0.37 mL, 2.4 mmol, 1.2 equiv) was then syringed into the reaction mixture, which was then heated to 50 °C and stirred for 18 h. At this time, analysis by TLC (10% EtOAc/hexanes) indicated full consumption of starting material. The reaction mixture was diluted with 150 mL EtOAc and washed with NH<sub>4</sub>Cl (1 × 25 mL), water (1 × 25 mL), brine (1 × 25 mL), dried over Na<sub>2</sub>SO<sub>4</sub>, filtered, and concentrated in vacuo. The resulting oily residue was purified by column chromatography using an elution gradient from 100% hexanes to 10% EtOAc/hexanes. Product-containing fractions were combined and concentrated in vacuo, and volatiles were removed at c.a. 10 mTorr for 18 h to afford **1k** as a viscous yellow oil (0.19 g, 41% yield).

<sup>1</sup>H NMR (CDCl<sub>3</sub>, 600 MHz): δ 6.15 (dt, *J* = 11.3, 2.3, 2.3 Hz, 1H), 6.05 (d, *J* = 11.4 Hz, 1H), 3.75 (s, 3H), 3.55 (t, *J* = 6.7, 2H), 2.47 (td, *J* = 7.0, 7.0, 2.1 Hz, 2H), 1.80 (t, *J* = 6.8 Hz, 2H), 1.61 (m, 2H), 1.47 (m, 4H).

<sup>13</sup>C NMR (CDCl<sub>3</sub>, 125 MHz): δ 165.4, 127.2, 124.4, 104.2, 77.9, 51.5, 45.2, 32.6, 28.3, 28.2, 26.5, 20.1.

HRMS (CI<sup>+</sup>): Calculated for C<sub>12</sub>H<sub>18</sub>ClO<sub>2</sub> ([M+H]<sup>+</sup>), 229.0995; found 229.0990.

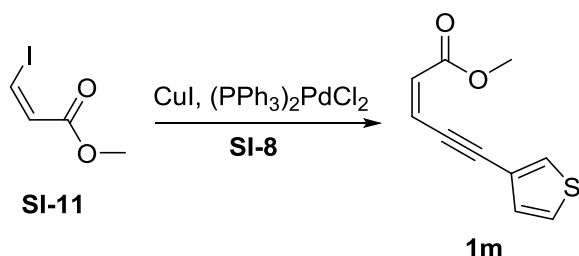

**Methyl (Z)-5-(thiophen-3-yl)pent-2-en-4-ynoate (1m)**. A flask was charged with compound **SI-11** (0.500 g, 2.35 mmol, 1.00 equiv), (PPh<sub>3</sub>)<sub>2</sub>PdCl<sub>2</sub> (0.124 mg, 0.176 mmol, 0.0750 equiv), CuI (0.017 g, 0.087 mmol, 0.037 equiv), and a stir bar. The flask was then evacuated and refilled with N<sub>2</sub> three times before 5.3 mL of Et<sub>3</sub>N was added. Compound **SI-8** (0.28 mL, 2.8 mmol, 1.2 equiv) was then syringed into the reaction mixture, which was then heated to 50 °C and stirred for 18 h. At this time, analysis by TLC (10% EtOAc/hexanes) indicated full consumption of starting material. The reaction mixture was diluted with 150 mL Et<sub>2</sub>O and washed with NH<sub>4</sub>Cl (1 × 25 mL), water (1 × 25 mL), brine (1 × 25 mL), dried over Na<sub>2</sub>SO<sub>4</sub>, filtered, and concentrated in vacuo. The resulting oily residue was purified by column chromatography using an elution gradient from 100% hexanes to 10% EtOAc/hexanes. Product-containing fractions were combined and concentrated in vacuo, and volatiles were removed at c.a. 10 mTorr for 18 h to afford **1m** as a viscous light yellow oil (0.22 g, 48% yield).

$^1\text{H}$  NMR ( $\text{CDCl}_3$ , 600 MHz):  $\delta$  7.59 (d,  $J = 2.9$  Hz, 1H), 7.28 (dd,  $J = 4.9, 3.1$  Hz, 1H), 7.18 (d,  $J = 5.0$  Hz, 1H), 6.34 (d,  $J = 11.5$  Hz, 1H), 6.12 (d,  $J = 11.5$  Hz, 1H), 3.78 (s, 3H).

$^{13}\text{C}$  NMR ( $\text{CDCl}_3$ , 125 MHz):  $\delta$  165.3, 130.7, 130.0, 127.5, 125.7, 123.3, 121.8, 96.8, 86.3, 51.6.

HRMS (CI $^+$ ): Calculated for  $\text{C}_{10}\text{H}_8\text{SO}_2$  ( $[\text{M}]^+$ ), 192.0245; found 192.0240.

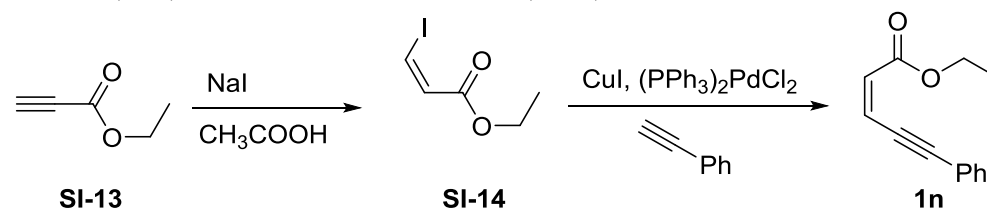

**Ethyl (Z)-3-iodoacrylate (SI-14)** was prepared according to a literature procedure<sup>10</sup> in 67% yield.  $^1\text{H}$  NMR ( $\text{CDCl}_3$ , 600 MHz):  $\delta$  7.43 (d,  $J = 8.9$  Hz, 1H), 6.89 (d,  $J = 8.9$  Hz, 1H), 4.25 (q,  $J = 7.1$  Hz, 2H), 1.32 (t,  $J = 7.1$  Hz, 3H). This spectrum is in agreement with previously reported spectral data.

**Ethyl (Z)-5-phenylpent-2-en-4-ynoate (1n)**. A flask was charged with compound **SI-14** (0.50 g, 2.2 mmol, 1.0 equiv),  $(\text{PPh}_3)_2\text{PdCl}_2$  (0.12 g, 0.17 mmol, 0.080 equiv), and CuI (0.015 g, 0.081 mmol, 0.040 equiv). The flask was then evacuated and refilled with  $\text{N}_2$  three times before 5 mL of  $\text{Et}_3\text{N}$  was added. Phenylacetylene (0.29 mL, 2.6 mmol, 1.2 equiv) was then syringed into the reaction mixture, which was then heated to  $50^\circ\text{C}$  and stirred for 18 h under dynamic  $\text{N}_2$ . At this time, analysis by TLC (10% EtOAc/hexanes) indicated full consumption of starting material. The reaction mixture was diluted with 150 mL  $\text{Et}_2\text{O}$  and washed with  $\text{NH}_4\text{Cl}$  ( $1 \times 25$  mL), water ( $1 \times 25$  mL), brine ( $1 \times 25$  mL), dried over  $\text{Na}_2\text{SO}_4$ , filtered, and concentrated in vacuo. The resulting oily residue was purified by column chromatography using an elution gradient from 100% hexanes to 10% EtOAc/hexanes. Product-containing fractions were combined and concentrated in vacuo, and volatiles were removed at c.a. 10 mTorr for 18 h to afford **1n** as a viscous light yellow oil (0.28 g, 63% yield).  $^1\text{H}$  NMR ( $\text{CDCl}_3$ , 600 MHz):  $\delta$  7.53 (dd,  $J = 7.4, 2.1$  Hz, 1H), 7.36-7.33 (m, 3H), 4.27 (q,  $J = 7.1$  Hz, 2H), 1.34 (t,  $J = 7.1$  Hz, 3H). This spectrum is in agreement with previously reported spectral data.<sup>2</sup>

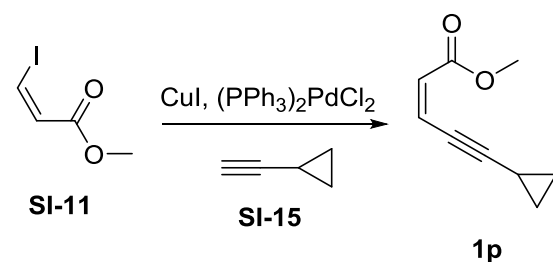

**Methyl (Z)-5-cyclopropylpent-2-en-4-ynoate (1p)**. This procedure was performed in a  $\text{N}_2$ -filled glove box. A 20 mL vial was charged with compound **SI-11** (0.424 g, 2.00 mmol, 1.00 equiv),  $(\text{PPh}_3)_2\text{PdCl}_2$  (0.112 g, 0.160 mmol, 0.0750 equiv), CuI (0.015 g, 0.080 mmol, 0.037 equiv), and a stir bar. 5 mL of  $\text{Et}_3\text{N}$  was added. Compound **SI-15** (0.20 mL, 2.4 mmol, 1.2 equiv) was then syringed into the reaction mixture, which was then heated to  $50^\circ\text{C}$  and stirred for 18 h. At this time, analysis by TLC (10% EtOAc/hexanes) indicated full consumption of starting

material. The reaction mixture was diluted with 150 mL Et<sub>2</sub>O and washed with NH<sub>4</sub>Cl (1 × 25 mL), water (1 × 25 mL), brine (1 × 25 mL), dried over Na<sub>2</sub>SO<sub>4</sub>, filtered, and concentrated in vacuo. The resulting oily residue was purified by column chromatography using an elution gradient from 100% hexanes to 10% EtOAc/hexanes. Product-containing fractions were combined and concentrated in vacuo [NOTE: product may be volatile] to afford 115 mg of **1p** as a yellow liquid in ~91% purity.

<sup>1</sup>H NMR (CDCl<sub>3</sub>, 600 MHz): δ 6.11 (dd, *J* = 11.4, 2.4 Hz, 1H), 6.01 (d, *J* = 11.3 Hz, 1H), 3.74 (s, 3H), 1.49 (ddt, 7.9, 5.3, 2.8, 2.8 Hz, 1H), 0.92 (m, 2H), 0.86 (m, 2H).

<sup>13</sup>C NMR (CDCl<sub>3</sub>, 125 MHz): δ 165.5, 126.7, 124.5, 108.3, 73.6, 51.5, 9.7, 1.1.

HRMS (CI<sup>+</sup>): Calculated for C<sub>9</sub>H<sub>10</sub>O<sub>2</sub> ([M]<sup>+</sup>), 150.0681; found 150.0677.

## B. Boron Electrophile Screen

**Table S1 (Table 1 in Manuscript). Boron Reagent Variation**

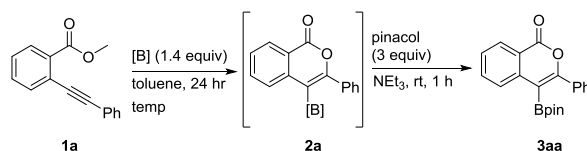

| Entry | Boron Electrophile [B] | Temp   | Yield (%)<br>3aa |
|-------|------------------------|--------|------------------|
| 1     | BBr <sub>3</sub>       | 45 °C  | 0                |
| 2     | BCl <sub>3</sub>       | 45 °C  | 0                |
| 3     | B-Chlorocatecholborane | 45 °C  | 25               |
| 4     | B-Chlorocatecholborane | 100 °C | 75               |
| 5     | B-Bromocatecholborane  | 100 °C | 48               |

### General Procedure: Entries 1 and 2

This screen was carried out in a nitrogen-filled glove box. A 4 mL vial was charged with **1a** (0.118 g, 0.500 mmol, 1.00 equiv) and 0.5 mL toluene. 0.6 mL (1.2 equiv) of a 1 M solution of either BBr<sub>3</sub> or BCl<sub>3</sub> was then added to the vial, and the vial was sealed and heated to 45 °C for 24 h. At this time, the reaction mixture was cooled down to room temperature. In a separate vial, pinacol (0.18 g, 1.5 mmol, 3.0 equiv) was dissolved in Et<sub>3</sub>N (1.0 mL, 7.5 mmol, 15 equiv). This solution was then added to the reaction mixture. The resulting solution was then stirred for 1 h at room temperature. The solution was then concentrated in vacuo. Analysis of the resulting residue via <sup>1</sup>H NMR spectroscopy (CDCl<sub>3</sub>, 600 MHz) and <sup>11</sup>B NMR Spectroscopy (CDCl<sub>3</sub>, 126 MHz) confirmed that the desired product **3aa** was not produced.

### General Procedure: Entries 3-5

This screen was carried out in a nitrogen-filled glove box. A 4 mL vial was charged with **1a** (0.118 g, 0.500 mmol, 1.00 equiv) and 0.5 mL toluene. In a separate vial, *B*-chlorocatecholborane (0.70 mmol, 1.4 equiv) or *B*-bromocatecholborane (0.70 mmol, 1.4 equiv) was added. The initial reaction vial was then transferred to the boron-containing vial via pipette,

and this vial was sealed and heated to the specified temperature for 24 h. At this time, the reaction mixture was cooled down to room temperature. In a separate vial, pinacol (0.18 g, 1.5 mmol, 3.0 equiv) was dissolved in Et<sub>3</sub>N (1.0 mL, 7.5 mmol, 15 equiv). This solution was then added to the reaction mixture. The resulting solution was then stirred for 1 h at room temperature. The solution was then concentrated in vacuo. The resulting oily residue was purified by column chromatography using an elution gradient from 100% hexanes to 15% EtOAc/hexanes. Product-containing fractions were combined and concentrated in vacuo, and volatiles were removed at c.a. 10 mTorr for 18 h to afford **3aa** as a light yellow oil, which solidified upon standing. The <sup>1</sup>H NMR spectrum for each entry was then compared to the authentic sample (see section D, product **3aa**) to establish identity.

### C. Reaction Condition Optimization

**Table S2. Optimization of the Oxyboration Reaction**

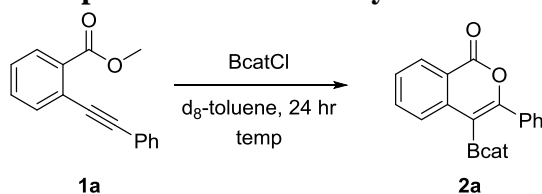

| Entry | Equivalents of BcatCl | Temp   | 2a:1a |
|-------|-----------------------|--------|-------|
| 1     | 1.0 equiv             | 100 °C | 76:24 |
| 2     | 1.2 equiv             | 100 °C | 81:19 |
| 3     | 1.3 equiv             | 100 °C | 87:13 |
| 4     | 1.4 equiv             | 100 °C | 95:5  |
| 5     | 1.4 equiv             | 75 °C  | 86:14 |
| 6     | 1.4 equiv             | 45 °C  | 40:60 |

Reaction condition screening reactions were set up in a N<sub>2</sub>-filled glovebox. **1a** (118 mg, 0.500 mmol, 1.00 equiv) was dissolved in anhydrous d<sub>8</sub>-toluene (0.50 mL) and added to a dram vial containing *B*-chlorocatecholborane in the below amounts (1.00–1.40 equiv). After mixing thoroughly, the reaction mixture was transferred to a J. Young NMR tube, removed from the glovebox, and heated in a preheated oil bath for 24 h. The progress of the reaction was then monitored by <sup>1</sup>H and <sup>11</sup>B NMR spectroscopy, with characteristic product (**2a**) peaks at δ = 8.26 ppm in the <sup>1</sup>H NMR spectrum, and δ ~ 32.1 ppm in the <sup>11</sup>B NMR spectrum in d<sub>8</sub>-toluene.

Note: the optimized concentration was 1.0 M was the best; when higher concentrations were tested, solubility issues were encountered.

#### D. Synthesis of *O*-Alkyl Esters and Screen

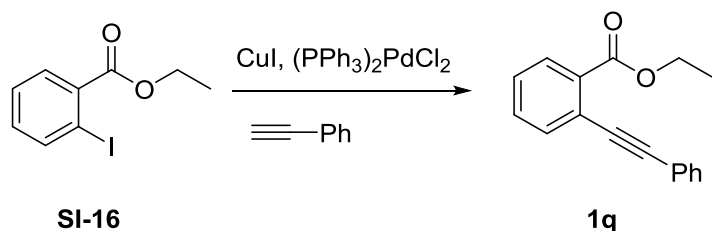

**Ethyl 2-(phenylethynyl)benzoate (1q).** A flask was charged with compound **SI-16** (0.96 g, 3.5 mmol, 1.0 equiv),  $(\text{PPh}_3)_2\text{PdCl}_2$  (0.049 g, 0.070 mmol, 0.020 equiv), and  $\text{CuI}$  (0.027 g, 0.14 mmol, 0.040 equiv). The flask was then evacuated and refilled with  $\text{N}_2$  three times before 7 mL of acetonitrile and  $\text{Et}_3\text{N}$  (3.8 mL, 28 mmol, 8.0 equiv) were added. Phenylacetylene (0.42 mL, 3.8 mmol, 1.1 equiv) was then syringed into the reaction mixture which stirred for 18 h under dynamic  $\text{N}_2$ . At this time, analysis by TLC (10%  $\text{EtOAc}$ /hexanes) indicated full consumption of starting material. The reaction mixture was diluted with 200 mL  $\text{EtOAc}$  and washed with  $\text{NH}_4\text{Cl}$  ( $1 \times 25$  mL), water ( $1 \times 25$  mL), brine ( $1 \times 25$  mL), dried over  $\text{Na}_2\text{SO}_4$ , filtered, and concentrated in vacuo. The resulting oily residue was purified by column chromatography using an elution gradient from 100% hexanes to 5%  $\text{EtOAc}$ /hexanes. Product-containing fractions were combined and concentrated in vacuo, and volatiles were removed at c.a. 10 mTorr for 18 h to afford **1q** as a light yellow oil (0.68 g, 78% yield).  $^1\text{H}$  NMR ( $\text{CDCl}_3$ , 600 MHz):  $\delta$  7.99 (dd,  $J = 7.9, 0.8$  Hz, 1H), 7.65 (dd,  $J = 7.7, 0.6$  Hz, 1H), 7.60-7.58 (m, 2H), 7.47 (app t,  $J = 7.6$  Hz, 1H), 7.38-7.34 (m, 4H), 4.44 (q,  $J = 7.2$  Hz, 2H), 1.41 (t,  $J = 7.2$  Hz, 3H). This spectrum is in agreement with previously reported spectral data.<sup>12</sup>

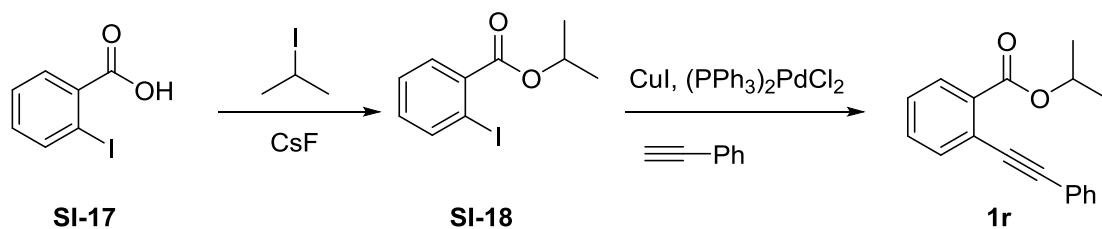

**Isopropyl 2-iodobenzoate (SI-18)** was prepared according to a literature procedure<sup>13</sup> in 56% yield.  $^1\text{H}$  NMR ( $\text{CDCl}_3$ , 500 MHz):  $\delta$  7.90 (dd,  $J = 7.9, 1.0$  Hz, 1H), 7.68 (dd,  $J = 7.7, 1.7$  Hz, 1H), 7.37 (td,  $J = 7.7, 1.0$  Hz, 1H), 7.10 (td,  $J = 7.9, 1.7$  Hz, 1H), 5.24 (hept,  $J = 6.2$  Hz, 1H), 1.39 (d,  $J = 6.2$  Hz, 6H). This spectrum is in agreement with previously reported spectral data.<sup>13</sup>

**Isopropyl 2-(phenylethynyl)benzoate (1r).** A flask was charged with compound **SI-18** (0.50 g, 1.7 mmol, 1.0 equiv),  $(\text{PPh}_3)_2\text{PdCl}_2$  (0.024 g, 0.034 mmol, 0.020 equiv), and  $\text{CuI}$  (0.013 g, 0.070 mmol, 0.040 equiv). The flask was then evacuated and refilled with  $\text{N}_2$  three times before 4 mL of acetonitrile and  $\text{Et}_3\text{N}$  (1.9 mL, 14 mmol, 8.0 equiv) were added. Phenylacetylene (0.21 mL, 1.9 mmol, 1.1 equiv) was then syringed into the reaction mixture which stirred for 18 h under dynamic  $\text{N}_2$ . At this time, analysis by TLC (15%  $\text{EtOAc}$ /hexanes) indicated full consumption of starting material. The reaction mixture was diluted with 200 mL  $\text{EtOAc}$  and washed with  $\text{NH}_4\text{Cl}$  ( $1 \times 25$  mL), water ( $1 \times 25$  mL), brine ( $1 \times 25$  mL), dried over  $\text{Na}_2\text{SO}_4$ , filtered, and

concentrated in vacuo. The resulting oily residue was purified by column chromatography using an elution gradient from 100% hexanes to 5% EtOAc/hexanes. Product-containing fractions were combined and concentrated in vacuo, and volatiles were removed at c.a. 10 mTorr for 18 h to afford **1r** as a light yellow oil (0.39 g, 85% yield).  $^1\text{H NMR}$  ( $\text{CDCl}_3$ , 600 MHz):  $\delta$  7.95 (dt,  $J = 7.9, 1.0$  Hz, 1H), 7.65-7.63 (m, 1H), 7.58-7.56 (m, 2H), 7.50 (td,  $J = 7.6, 1.4$  Hz, 1H), 7.39-7.34 (m, 4H), 5.30 (hept,  $J = 6.2$  Hz, 1H), 1.38 (d,  $J = 6.2$  Hz, 6H). This spectrum is in agreement with previously reported spectral data.<sup>14</sup>

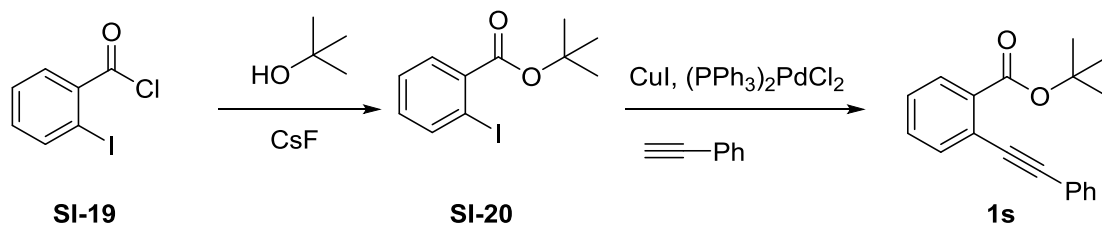

**tert-Butyl 2-iodobenzoate (SI-20)** was prepared according to a literature procedure in 75% yield.  $^1\text{H NMR}$  ( $\text{CDCl}_3$ , 600 MHz):  $\delta$  7.94 (dd,  $J = 7.9, 1.0$  Hz, 1H), 7.68 (dd,  $J = 7.7, 1.7$  Hz, 1H), 7.37 (td,  $J = 7.7, 1.0$  Hz, 1H), 7.10 (td,  $J = 7.9, 1.7$  Hz, 1H), 1.6 (s, 29H). This spectrum is in agreement with previously reported spectral data.<sup>13</sup>

**tert-Butyl 2-(phenylethynyl)benzoate (1s)**. A flask was charged with compound **SI-20** (0.49 g, 1.6 mmol, 1.0 equiv),  $(\text{PPh}_3)_2\text{PdCl}_2$  (0.022 g, 0.032 mmol, 0.020 equiv), and CuI (0.012 g, 0.064 mmol, 0.040 equiv). The flask was then evacuated and refilled with  $\text{N}_2$  three times before 3 mL of acetonitrile and  $\text{Et}_3\text{N}$  (1.8 mL, 13 mmol, 8.0 equiv) were added. Phenylacetylene (0.20 mL, 1.8 mmol, 1.1 equiv) was then syringed into the reaction mixture which stirred for 18 h under dynamic  $\text{N}_2$ . At this time, analysis by TLC (10% EtOAc/hexanes) indicated full consumption of starting material. The reaction mixture was diluted with 200 mL EtOAc and washed with  $\text{NH}_4\text{Cl}$  ( $1 \times 25$  mL), water ( $1 \times 25$  mL), brine ( $1 \times 25$  mL), dried over  $\text{Na}_2\text{SO}_4$ , filtered, and concentrated in vacuo. The resulting oily residue was purified by column chromatography using an elution gradient from 100% hexanes to 5% EtOAc/hexanes. Product-containing fractions were combined and concentrated in vacuo, and volatiles were removed at c.a. 10 mTorr for 18 h to afford **1s** as a light yellow oil (0.40 g, 90% yield).  $^1\text{H NMR}$  ( $\text{CDCl}_3$ , 600 MHz):  $\delta$  7.86 (dd,  $J = 7.9, 0.8$  Hz, 1H), 7.56 (dd,  $J = 7.7, 0.8$  Hz, 1H), 7.51 (dd,  $J = 8.1, 1.9$  Hz, 2H), 7.39 (td,  $J = 7.7, 1.3$  Hz, 1H), 7.32-7.28 (m, 4H), 1.56 (s, 9H). This spectrum is in agreement with previously reported spectral data.<sup>2</sup>

**Table S3 (Table 3 in Manuscript). Mechanistic Insight from *O*-Alkyl Group Variance of the Oxyboration Reaction**

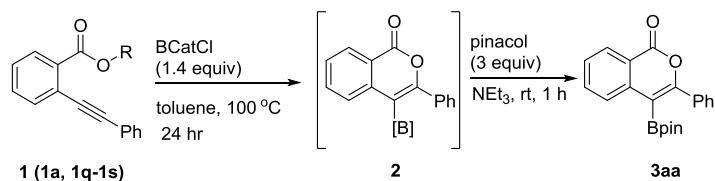

| Entry | R   | $^1\text{H}$ NMR Yield (%) <b>3aa</b> |
|-------|-----|---------------------------------------|
| 1     | Me  | 81                                    |
| 2     | Et  | 68                                    |
| 3     | iPr | 60                                    |
| 4     | tBu | 0                                     |

### General Procedure

This screen was carried out in a nitrogen-filled glove box. A 4 mL vial was charged with the desired *O*-alkyl ester (**1a**, **1q-1s**) (0.50 mmol, 1.0 equiv) and 0.5 mL toluene. In a separate vial, *B*-chlorocatecholborane (0.70 mmol, 1.4 equiv) was added. The solution in the initial reaction vial was then transferred to the boron-containing vial via pipette, and this vial was sealed and heated to  $100\text{ }^\circ\text{C}$  for 24 h. At this time, the reaction mixture was cooled to room temperature. In a separate vial, pinacol (0.18 g, 1.5 mmol, 3.0 equiv) was dissolved in  $\text{Et}_3\text{N}$  (1.0 mL, 7.5 mmol, 15 equiv). This solution was then added to the reaction mixture via pipette. The resulting solution was then stirred for 1 h at room temperature and then concentrated in vacuo. An  $^1\text{H}$  NMR spectrum was then taken of each crude mixture in  $\text{CDCl}_3$ ; mesitylene (50.  $\mu\text{L}$ , 0.36 mmol, 0.72 equiv) was added to the sample via gas tight syringe to determine the yield of the desired borylated isocoumarin **3aa**. In entry 4 ( $\text{R} = t\text{Bu}$ ), the mesitylene was compared to characteristic peaks of the benzoic acid derivative of **1a** from an authentic sample synthesized using a known procedure.<sup>15</sup>

### Procedure to Monitor the Formation of Isobutylene from Entry 4

A 4 mL vial was charged with compound **1s** (0.10 g, 0.37 mmol, 1.0 equiv), 1,3,5-triisopropylbenzene (30  $\mu\text{L}$ , 0.12 mmol, 0.24 equiv), and 0.4 mL *d*<sub>8</sub>-toluene. In a separate vial, *B*-chlorocatecholborane (0.080 g, 0.52 mmol, 1.4 equiv) was added. The solution in the initial reaction vial was then transferred to the boron-containing vial via pipette, and then this mixture was transferred to a J-young tube via pipette. The tube was heated to  $100\text{ }^\circ\text{C}$ .  $^1\text{H}$  NMR spectra were taken at  $t = 3\text{ h}$  and  $24\text{ h}$  to monitor isobutylene formation, as well as to confirm that catecholboronic ester **2s** did not form.

## E. Synthesis and Isolation of Carboxyboration Products **3aa-3p**

### General Remarks

For synthetic ease, these reactions were carried out in a nitrogen-filled glovebox unless specified otherwise. *B*-Chlorocatecholborane is water-reactive and should be stored cool ( $0\text{ }^\circ\text{C}$  or lower) in a desiccator or glovebox when not in use. The ipso C–B bond is not detected by  $^{13}\text{C}$  NMR spectroscopy.

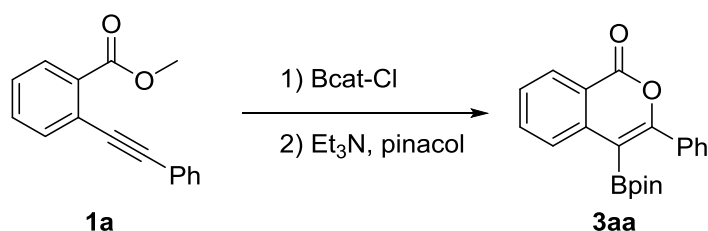

**3-phenyl-4-(4,4,5,5-tetramethyl-1,3,2-dioxaborolan-2-yl)-1H-isochromen-1-one (3aa).** A vial was charged with **1a** (0.118 g, 0.500 mmol, 1.00 equiv) and 0.5 mL toluene. A separate vial equipped with a stir bar was charged with *B*-chlorocatecholborane (0.108 g, 0.700 mmol, 1.40 equiv). The resulting homogenous solution from the first vial was then added dropwise over c.a. 2 min to the boron-containing vial, which stirred for 24 h at 100 °C. At this time, the reaction mixture was cooled to room temperature and then diluted with 0.5 mL toluene. A separate vial was then charged with pinacol (0.177 g, 1.50 mmol, 3.00 equiv) and Et<sub>3</sub>N (1.0 mL, 7.5 mmol, 15 equiv). The reaction mixture was added dropwise over c.a. 2 min to this vial, and the resulting mixture stirred for 1 h at room temperature. The solution was concentrated in vacuo and the resulting residue was purified by column chromatography using an elution gradient from 100% hexanes to 15% EtOAc/hexanes. Product-containing fractions were combined and concentrated in vacuo, and volatiles were removed at c.a. 10 mTorr for 18 h to afford **3aa** as a yellow oil (0.13 g, 75% yield).

<sup>1</sup>H NMR (toluene-*d*<sub>8</sub>, 600 MHz): δ 8.32 (app dd, *J* = 7.9, 1.0 Hz, 1H), 7.92 (app dd, *J* = 7.9, 0.4 Hz, 1H), 7.52-7.50 (m, 2H), 7.27 (ddd, *J* = 15.3, 6.5, 1.5 Hz, 1H), 7.12-6.99 (m, 4H), 0.99 (s, 12H).

<sup>13</sup>C NMR (toluene-*d*<sub>8</sub>, 125 MHz): δ 161.4, 160.9, 129.1, 128.7, 128.1, 128.1, 127.8, 125.3, 124.9, 84.0, 24.7, 20.7, 20.6, 20.3, 20.1.

<sup>11</sup>B NMR (toluene-*d*<sub>8</sub>, 193 MHz): δ 31.5.

HRMS (ESI<sup>+</sup>): Calculated for C<sub>21</sub>H<sub>21</sub>BO<sub>4</sub>Na ([M+Na]<sup>+</sup>), 371.1435; found 371.1434.

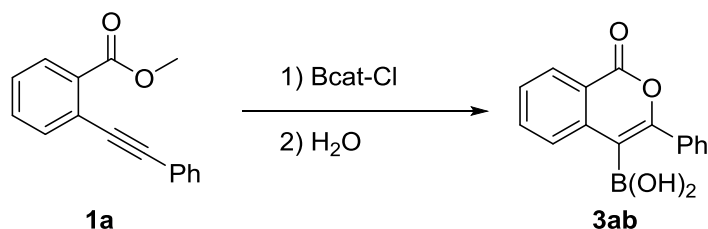

**(1-oxo-3-phenyl-1H-isochromen-4-yl)boronic acid (3ab).** A vial was charged with **1a** (0.118 g, 0.500 mmol, 1.00 equiv) and 0.5 mL toluene. A separate vial equipped with a stir bar was charged with *B*-chlorocatecholborane (0.108 g, 0.700 mmol, 1.40 equiv). The resulting homogenous solution from the first vial was then added dropwise over c.a. 2 min to the boron-containing vial, which stirred for 24 h at 100 °C. At this time, the reaction mixture was cooled to room temperature and transferred to a vial containing 1 mL of water, and the resulting mixture was stirred vigorously for 18 h at room temperature. The solution was then filtered through a medium porosity fritted funnel. The solid was then rinsed with cold (~0 °C) water (3 × 3 mL).



The solid was dried in vacuo c.a. 10 mTorr for 18 h to afford **3ab** as a light purple solid (0.088 g, 66% yield).

$^1\text{H}$  NMR ( $\text{CD}_3\text{CN}$ , 600 MHz):  $\delta$  8.27 (dd,  $J = 7.9, 0.9$  Hz, 1H), 7.81 (ddd,  $J = 15.2, 7.2, 1.4$  Hz, 1H), 7.76-7.75 (m, 2H), 7.65 (app d,  $J = 7.7$  Hz, 1H), (ddd,  $J = 15.2, 7.9, 0.5$  Hz, 1H), 7.53-7.49 (m, 3H), 6.51 (s, 2H).

$^{13}\text{C}$  NMR ( $\text{CD}_3\text{CN}$ , 125 MHz):  $\delta$  162.2, 155.2, 139.4, 135.0, 134.9, 129.9, 129.1, 128.7, 128.2, 127.5, 127.0, 121.0.

$^{11}\text{B}$  NMR ( $\text{CD}_3\text{CN}$ , 193 MHz):  $\delta$  30.0.

HRMS (ESI<sup>-</sup>): Calculated for  $\text{C}_{15}\text{H}_{11}\text{BO}_4\text{Cl}$  ( $[\text{M}+\text{Cl}]^-$ ), 301.0442; found 301.0441.

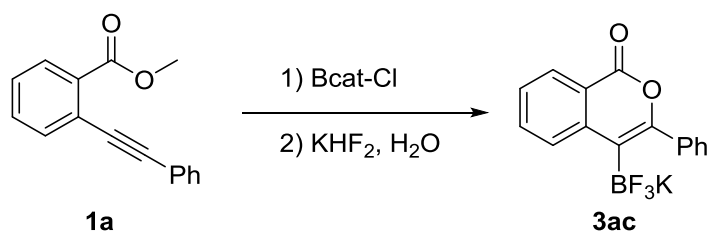

**3-Phenyl-4-(trifluoro- $\lambda^4$ -boranyl)-1H-isochromen-1-one, potassium salt (3ac).** A vial was charged with **1a** (0.118 g, 0.500 mmol, 1.00 equiv) and 0.5 mL toluene. A separate vial equipped with a stir bar was charged with *B*-chlorocatecholborane (0.108 g, 0.700 mmol, 1.40 equiv). The resulting homogenous solution from the first vial was then added dropwise over c.a. 2 min to the boron-containing vial, which stirred for 24 h at 100 °C. At this time, the reaction mixture was cooled to room temperature and then concentrated in vacuo. The residue was then dissolved in 1 mL of acetone and then transferred via pipette to another flask containing a solution of  $\text{KHF}_2$  (0.137g, 1.80 mmol, 3.50 equiv) in 1.5 mL of  $\text{H}_2\text{O}$ . The resulting mixture was stirred for 1 h then concentrated in vacuo at c.a. 10 mTorr for 1 h. The product was then filtered through a medium porosity fritted funnel. The solid was then rinsed with cold ( $\sim 0$  °C) water ( $3 \times 3$  mL) and ether ( $3 \times 3$  mL). The solid was dried in vacuo c.a. 10 mTorr for 18 h to afford **3ac** as a white solid (0.103 g, 63% yield).

$^1\text{H}$  NMR ( $(\text{CD}_3)_2\text{CO}$ , 600 MHz):  $\delta$  8.37 (d,  $J = 8.1$  Hz, 1H), 8.16 (d,  $J = 7.7$  Hz, 1H), 7.68 (d,  $J = 6.4$  Hz, 2H), 7.64 (t,  $J = 7.7$  Hz, 1H), 7.40 (t,  $J = 7.4$  Hz, 1H), 7.31-7.30 (m, 3H).

$^{13}\text{C}$  NMR ( $(\text{CD}_3)_2\text{CO}$ , 600 MHz):  $\delta$  168.5, 160.0, 148.8, 143.2, 138.2, 138.1, 135.4, 135.3, 135.2, 132.9, 131.9, 131.2, 126.3.

$^{11}\text{B}$  NMR ( $(\text{CD}_3)_2\text{CO}$ , 193 MHz):  $\delta$  2.9.

$^{19}\text{F}$  NMR ( $(\text{CD}_3)_2\text{CO}$ , 376 MHz):  $\delta$  -131.6.

HRMS (ESI<sup>-</sup>): Calculated for  $\text{C}_{15}\text{H}_9\text{BF}_3\text{O}_2$  ( $[\text{M}-\text{K}]^-$ ), 289.0651; found 289.0640.

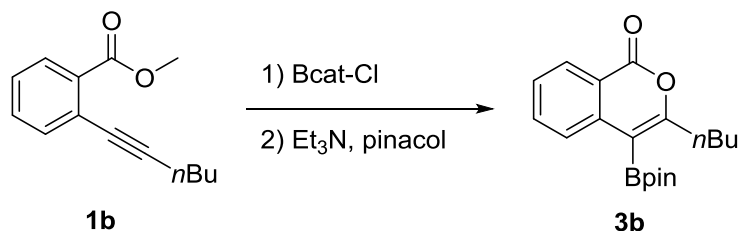

**3-butyl-4-(4,4,5,5-tetramethyl-1,3,2-dioxaborolan-2-yl)-1H-isochromen-1-one (3b).** A vial was charged with **1b** (0.108 g, 0.500 mmol, 1.00 equiv) and 0.5 mL toluene. A separate vial equipped with a stir bar was charged with *B*-chlorocatecholborane (0.108 g, 0.700 mmol, 1.40 equiv). The resulting homogenous solution from the first vial was then added dropwise over c.a. 2 min to the boron-containing vial, which stirred for 24 h at 100 °C. At this time, the reaction mixture was cooled to room temperature and then diluted with 0.5 mL toluene. A separate vial was then charged with pinacol (0.177 g, 1.50 mmol, 3.00 equiv) and Et<sub>3</sub>N (1.0 mL, 7.5 mmol, 15 equiv). The reaction mixture was added dropwise over c.a. 2 min to this vial, and the resulting mixture stirred for 1 h at room temperature. The solution was concentrated in vacuo and the resulting residue was purified by column chromatography using an elution gradient from 100% hexanes to 15% EtOAc/hexanes. Product-containing fractions were combined and concentrated in vacuo, and volatiles were removed at c.a. 10 mTorr for 18 h to afford **3b** as a yellow oil (0.16 g, 97% yield).

<sup>1</sup>H NMR (CDCl<sub>3</sub>, 600 MHz): δ 8.24 (d, *J* = 9.5 Hz, 1H), 8.04 (d, *J* = 9.9 Hz, 1H), 7.65 (td, *J* = 9.5, 1.5 Hz, 1H), 7.42-7.38 (m, 1H), 2.80 (t, *J* = 9.3 Hz, 2H), 1.72-1.66 (m, 2H), 1.39-1.38 (m, 14H), 0.92 (t, *J* = 8.9 Hz, 3H).

<sup>13</sup>C NMR (CDCl<sub>3</sub>, 125 MHz): δ 166.6, 162.9, 139.8, 134.7, 129.2, 127.2, 126.6, 119.9, 84.0, 33.7, 30.9, 24.9, 22.5, 13.9.

<sup>11</sup>B NMR (CDCl<sub>3</sub>, 193 MHz): δ 31.6.

HRMS (ESI<sup>+</sup>): Calculated for C<sub>19</sub>H<sub>25</sub>BO<sub>4</sub>K ([M+K]<sup>+</sup>), 367.1487; found 367.1481.

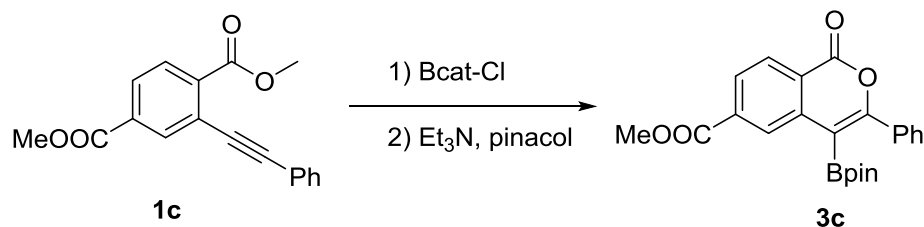

**Methyl 1-oxo-3-phenyl-4-(4,4,5,5-tetramethyl-1,3,2-dioxaborolan-2-yl)-1H-isochromene-6-carboxylate (3c).** A vial was charged with **1c** (0.147 g, 0.500 mmol, 1.00 equiv) and 0.5 mL toluene. A separate vial equipped with a stir bar was charged with *B*-chlorocatecholborane (0.108 g, 0.700 mmol, 1.40 equiv). The resulting homogenous solution from the first vial was then added dropwise over c.a. 2 min to the boron-containing vial, which stirred for 24 h at 100 °C. At this time, the reaction mixture was cooled to room temperature and then diluted with 0.5 mL toluene. A separate vial was then charged with pinacol (0.177 g, 1.50 mmol, 3.00 equiv) and Et<sub>3</sub>N (1.0 mL, 7.5 mmol, 15 equiv). The reaction mixture was added dropwise over c.a. 2 min to this vial, and the resulting mixture stirred for 1 h at room temperature. The solution was concentrated in vacuo and the resulting residue was purified by column chromatography using an elution gradient from 100% hexanes to 20% EtOAc/hexanes. Product-containing fractions were combined and concentrated in vacuo, and volatiles were removed at c.a. 10 mTorr for 18 h to afford **3c** as a yellow solid (0.13 g, 65% yield).

<sup>1</sup>H NMR (CDCl<sub>3</sub>, 600 MHz): δ 8.60 (d, *J* = 1.1 Hz, 1H), 8.40 (d, *J* = 8.2 Hz, 1H), 8.10 (dd, *J* = 8.2, 1.5 Hz, 1H), 7.71-7.70 (m, 2H), 7.49-7.43 (m, 3H), 3.99 (s, 3H), 1.35 (s, 12H).

$^{13}\text{C}$  NMR ( $\text{CDCl}_3$ , 125 MHz):  $\delta$  166.0, 161.8, 160.3, 139.7, 135.4, 134.2, 130.4, 129.9, 128.8, 128.4, 128.3, 128.1, 123.1, 84.8, 52.7, 24.8.

$^{11}\text{B}$  NMR ( $\text{CDCl}_3$ , 193 MHz):  $\delta$  31.7.

HRMS (ESI+): Calculated for  $\text{C}_{23}\text{H}_{23}\text{BO}_6\text{Na}$  ( $[\text{M}+\text{Na}]^+$ ), 429.1490; found 429.1499.

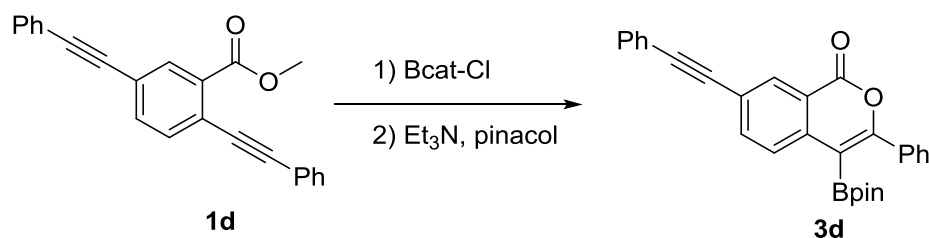

**3-phenyl-7-(phenylethynyl)-4-(4,4,5,5-tetramethyl-1,3,2-dioxaborolan-2-yl)-1H-**

**isochromen-1-one (3d).** A vial was charged with **1d** (0.168 g, 0.500 mmol, 1.00 equiv) and 0.5 mL toluene. A separate vial equipped with a stir bar was charged with *B*-chlorocatecholborane (0.108 g, 0.700 mmol, 1.40 equiv). The resulting homogenous solution from the first vial was then added dropwise over c.a. 2 min to the boron-containing vial, which stirred for 24 h at 100 °C. At this time, the reaction mixture was cooled to room temperature and then diluted with 0.5 mL toluene. A separate vial was then charged with pinacol (0.177 g, 1.50 mmol, 3.00 equiv) and  $\text{Et}_3\text{N}$  (1.0 mL, 7.5 mmol, 15 equiv). The reaction mixture was added dropwise over c.a. 2 min to this vial, and the resulting mixture stirred for 1 h at room temperature. The solution was concentrated in vacuo and the resulting residue was purified by column chromatography using an elution gradient from 100% hexanes to 15% EtOAc/hexanes. Product-containing fractions were combined and concentrated in vacuo, and volatiles were removed at c.a. 10 mTorr for 18 h to afford **3d** as a yellow solid (0.15 g, 66% yield).

$^1\text{H}$  NMR ( $\text{CDCl}_3$ , 600 MHz):  $\delta$  8.50 (s, 1H), 7.85-7.81 (m, 2H), 7.68 (app d,  $J = 7.5$  Hz, 2H), 7.56-7.54 (m, 2H), 7.47-7.45 (m, 1H), 7.43-7.41 (m, 2H), 7.38-7.35 (m, 3H), 1.29 (s, 12H).

$^{13}\text{C}$  NMR ( $\text{CDCl}_3$ , 125 MHz):  $\delta$  161.7, 160.5, 139.2, 137.3, 134.5, 132.7, 131.8.9, 130.3, 128.9, 128.8, 128.5, 128.2, 126.6, 123.1, 122.8, 120.3, 91.5, 88.3, 84.6, 24.9.

$^{11}\text{B}$  NMR ( $\text{CDCl}_3$ , 193 MHz):  $\delta$  31.3.

HRMS (ESI+): Calculated for  $\text{C}_{29}\text{H}_{25}\text{BO}_4\text{Na}$  ( $[\text{M}+\text{Na}]^+$ ), 471.1749; found 471.1759.

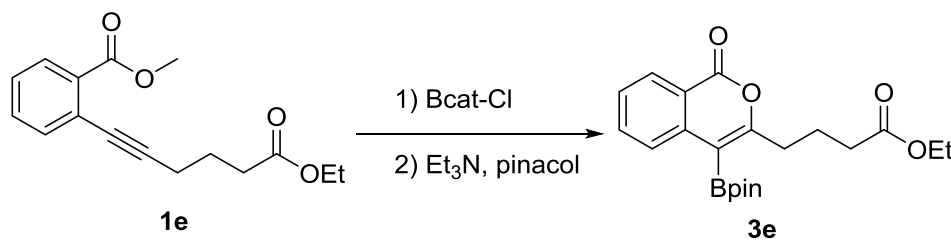

**Ethyl 4-(1-oxo-4-(4,4,5,5-tetramethyl-1,3,2-dioxaborolan-2-yl)-1H-isochromen-3-yl)butanoate (3e).** A vial was charged with **1e** (0.064 g, 0.23 mmol, 1.0 equiv) and 0.23 mL toluene. A separate vial equipped with a stir bar was charged with *B*-chlorocatecholborane

(0.050 g, 0.33 mmol, 1.4 equiv). The resulting homogenous solution from the first vial was then added dropwise over c.a. 2 min to the boron-containing vial, which stirred for 24 h at 100 °C. At this time, the reaction mixture was cooled to room temperature and then diluted with 0.23 mL toluene. A separate vial was then charged with pinacol (0.083 g, 0.70 mmol, 3.0 equiv) and Et<sub>3</sub>N (0.50 mL, 3.8 mmol, 15 equiv). The reaction mixture was added dropwise over c.a. 2 min to this vial, and the resulting mixture stirred for 1 h at room temperature. The solution was concentrated in vacuo and the resulting residue was purified by column chromatography using an elution gradient from 100% hexanes to 20% EtOAc/hexanes. Product-containing fractions were combined and concentrated in vacuo, and volatiles were removed at c.a. 10 mTorr for 18 h to afford **3e** as a yellow solid (0.050 g, 55% yield).

<sup>1</sup>H NMR (CDCl<sub>3</sub>, 600 MHz): δ 8.25 (app d, *J* = 8.0 Hz, 1H), 8.08 (app d, *J* = 8.2 Hz, 1H), 7.66 (ddd, *J* = 11.8, 5.9, 1.1 Hz, 1H), 7.42 (app t, *J* = 7.6 Hz, 1H), 4.09 (q, *J* = 7.1 Hz, 2H), 2.87 (t, *J* = 7.4 Hz, 2H), 2.36 (t, *J* = 7.6 Hz, 2H), 2.05 (tt, *J* = 14.8, 7.5 Hz, 2H), 1.38 (s, 12H), 1.22 (t, *J* = 7.1 Hz, 3H).

<sup>13</sup>C NMR (CDCl<sub>3</sub>, 125 MHz): δ 173.1, 165.2, 162.7, 139.5, 134.7, 129.3, 127.5, 126.8, 120.0, 84.2, 60.4, 33.6, 33.1, 24.9, 23.7, 14.3.

<sup>11</sup>B NMR (CDCl<sub>3</sub>, 193 MHz): δ 31.3.

HRMS (ESI): Calculated for C<sub>21</sub>H<sub>27</sub>BO<sub>6</sub>Na ([M+Na]<sup>+</sup>), 409.1802; found 409.1808.

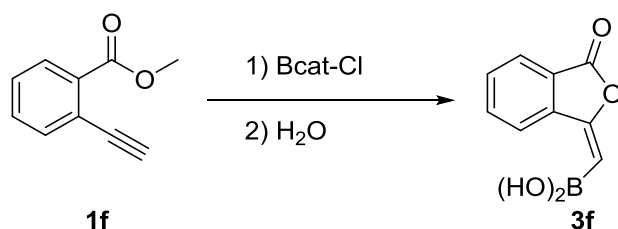

**(E)-((3-oxisobenzofuran-1(3H)-ylidene)methyl)boronic acid (3f)**. A vial was charged with **1f** (0.080 g, 0.50 mmol, 1.0 equiv) and 0.5 mL toluene. A separate vial equipped with a stir bar was charged with *B*-chlorocatecholborane (0.108 g, 0.700 mmol, 1.40 equiv). The resulting homogenous solution from the first vial was then added dropwise over c.a. 2 min to the boron-containing vial, which stirred for 20 h at 100 °C. At this time, the reaction mixture was cooled to room temperature and then transferred to a vial containing 10 mL of water, and the resulting mixture stirred vigorously for 3 h at room temperature. The solution was then filtered through a medium porosity fritted funnel. The solid was then rinsed with cold (~0 °C) water (3 × 3 mL). The solid was then dried in vacuo c.a. 10 mTorr for 18 h to afford **3f** as a white solid (0.058 g, 61% yield).

<sup>1</sup>H NMR (CD<sub>3</sub>CN, 600 MHz): δ 8.60 (d, *J* = 9.6 Hz, 1H), 7.87 (d, *J* = 9.2 Hz, 1H), 7.79 (app t, *J* = 9.2 Hz, 1H), 7.65 (app t, *J* = 9.0 Hz, 1H), 6.34 (s, 2H), 5.48 (s, 1H).

<sup>13</sup>C NMR (CDCl<sub>3</sub>, 125 MHz): δ 167.5, 157.2, 139.3, 135.6, 131.8, 127.5, 125.99, 125.4, 118.3.

<sup>11</sup>B NMR (CD<sub>3</sub>CN, 193 MHz): δ 28.1.

HRMS (ESI-): Calculated for C<sub>9</sub>H<sub>7</sub>BO<sub>4</sub>Cl ([M+Cl]<sup>-</sup>), 225.0128; found 225.0121.

HMQC was used to confirm the formation of the 5-*exo-dig* product. Because ipso B–C resonances are not detected in  $^{13}\text{C}$  NMR, the resonance at  $\delta = 5.48$  ppm in the HMQC must be attached to an ipso B–C bond because no  $^{13}\text{C}$  NMR signal correlates.

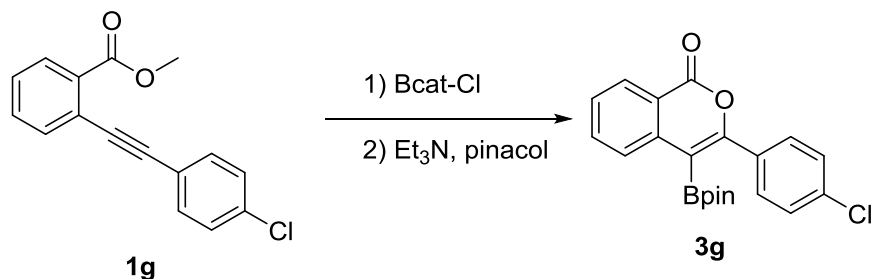

**3-(4-chlorophenyl)-4-(4,4,5,5-tetramethyl-1,3,2-dioxaborolan-2-yl)-1H-isochromen-1-one (3g).** A vial was charged with **1g** (0.135 g, 0.500 mmol, 1.00 equiv) and 0.5 mL toluene. A separate vial equipped with a stir bar was charged with *B*-chlorocatecholborane (0.108 g, 0.700 mmol, 1.40 equiv). The resulting homogenous solution from the first vial was then added dropwise over c.a. 2 min to the boron-containing vial, which stirred for 24 h at 100 °C. At this time, the reaction mixture was cooled to room temperature and then diluted with 0.5 mL toluene. A separate vial was then charged with pinacol (0.177 g, 1.50 mmol, 3.00 equiv) and Et<sub>3</sub>N (1.0 mL, 7.5 mmol, 15 equiv). The reaction mixture was added dropwise over c.a. 2 min to this vial, and the resulting mixture stirred for 1 h at room temperature. The solution was concentrated in vacuo and the resulting residue was purified by column chromatography using an elution gradient from 100% hexanes to 20% EtOAc/hexanes. Product-containing fractions were combined and concentrated in vacuo, and volatiles were removed at c.a. 10 mTorr for 18 h to afford **3g** as a white solid (0.11 g, 60% yield).

$^1\text{H}$  NMR (CDCl<sub>3</sub>, 600 MHz):  $\delta$  8.34 (d,  $J = 7.9$  Hz, 1H), 7.87 (d,  $J = 7.8$  Hz, 1H), 7.73 (app t,  $J = 7.7$  Hz, 1H), 7.64-7.62 (m, 2H), 7.52 (app t,  $J = 7.7$  Hz, 1H), 7.41-7.39 (m, 2H), 1.31 (s, 12H).

$^{13}\text{C}$  NMR (CDCl<sub>3</sub>, 125 MHz):  $\delta$  162.3, 158.8, 139.5, 136.3, 135.0, 133.2, 130.4, 129.8, 128.5, 128.3, 126.6, 120.3, 84.7, 25.0.

$^{11}\text{B}$  NMR (CDCl<sub>3</sub>, 193 MHz):  $\delta$  31.4.

HRMS (ESI<sup>+</sup>): Calculated for C<sub>21</sub>H<sub>20</sub>BClO<sub>4</sub>Na ([M+Na]<sup>+</sup>), 405.1045; found 405.1048.

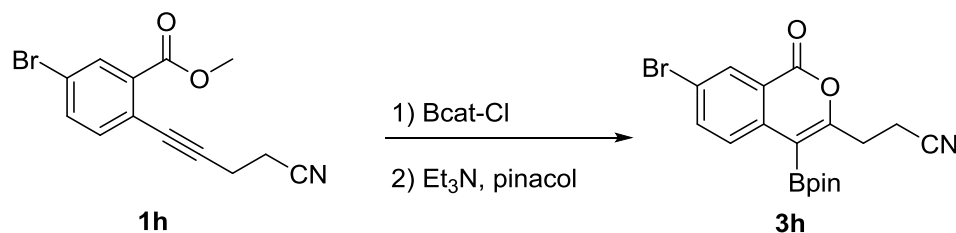

**3-(7-bromo-1-oxo-4-(4,4,5,5-tetramethyl-1,3,2-dioxaborolan-2-yl)-1H-isochromen-3-yl)propanenitrile (3h).** A vial was charged with **1h** (0.146 g, 0.500 mmol, 1.00 equiv) and 0.5 mL toluene. A separate vial equipped with a stir bar was charged with *B*-chlorocatecholborane (0.108 g, 0.700 mmol, 1.40 equiv). The resulting homogenous solution from the first vial was

then added dropwise over c.a. 2 min to the boron-containing vial, which stirred for 24 h at 100 °C. At this time, the reaction mixture was cooled to room temperature and then diluted with 0.5 mL toluene. A separate vial was then charged with pinacol (0.177 g, 1.50 mmol, 3.00 equiv) and Et<sub>3</sub>N (1.0 mL, 7.5 mmol, 15 equiv). The reaction mixture was added dropwise over c.a. 2 min to this vial, and the resulting mixture stirred for 1 h at room temperature. The solution was concentrated in vacuo and the resulting residue was purified by column chromatography using an elution gradient from 100% hexanes to 25% EtOAc/hexanes. Product-containing fractions were combined and concentrated in vacuo, and volatiles were removed at c.a. 10 mTorr for 18 h to afford **3h** as a white solid (0.079 g, 39% yield).

<sup>1</sup>H NMR (CDCl<sub>3</sub>, 600 MHz): δ 8.37 (d, *J* = 2.2 Hz, 1H), 8.18 (d, *J* = 8.7 Hz, 1H), 7.78 (dd, *J* = 8.7, 2.2 Hz, 1H), 3.26 (t, *J* = 7.4 Hz, 2H), 2.76 (t, *J* = 7.4 Hz, 2H), 1.40 (s, 12H).

<sup>13</sup>C NMR (CDCl<sub>3</sub>, 125 MHz): δ 162.3, 160.7, 138.1, 137.7, 131.8, 129.4, 121.8, 121.8, 118.3, 84.6, 29.7, 25.0, 16.2.

<sup>11</sup>B NMR (CDCl<sub>3</sub>, 193 MHz): δ 30.6.

HRMS (ESI<sup>+</sup>): Calculated for C<sub>18</sub>H<sub>19</sub>BBrNO<sub>4</sub>Na ([M+Na]<sup>+</sup>), 426.0492; found 426.0486.

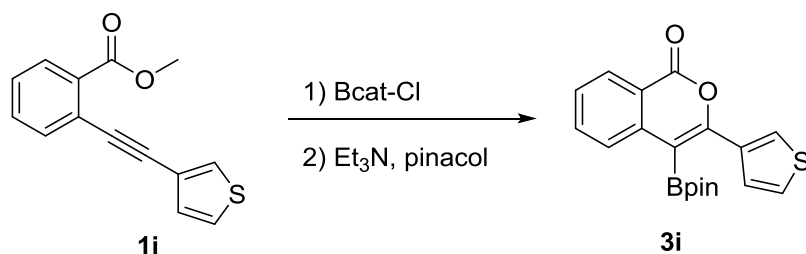

**4-(4,4,5,5-tetramethyl-1,3,2-dioxaborolan-2-yl)-3-(thiophen-3-yl)-1H-isochromen-1-one (3i).**

A vial was charged with **1i** (0.177 g, 0.500 mmol, 1.00 equiv) and 0.5 mL toluene. A separate vial equipped with a stir bar was charged with *B*-chlorocatecholborane (0.108 g, 0.700 mmol, 1.40 equiv). The resulting homogenous solution from the first vial was then added dropwise over c.a. 2 min to the boron-containing vial, which stirred for 24 h at 100 °C. At this time, the reaction mixture was cooled to room temperature and then diluted with 0.5 mL toluene. A separate vial was then charged with pinacol (0.177 g, 1.50 mmol, 3.00 equiv) and Et<sub>3</sub>N (1.0 mL, 7.5 mmol, 15 equiv). The reaction mixture was added dropwise over c.a. 2 min to this vial, and the resulting mixture stirred for 1 h at room temperature. The solution was concentrated in vacuo and the resulting residue was purified by column chromatography using an elution gradient from 100% hexanes to 20% EtOAc/hexanes. Product-containing fractions were combined and concentrated in vacuo, and volatiles were removed at c.a. 10 mTorr for 18 h to afford **3i** as a white solid (0.13 g, 71% yield).

<sup>1</sup>H NMR (CDCl<sub>3</sub>, 600 MHz): δ 8.31 (app d, *J* = 7.9 Hz, 1H), 7.78-7.76 (m, 1H), 7.74 (dd, *J* = 8.0, 0.3 Hz, 1H), 7.69 (ddd, *J* = 7.6, 7.6, 1.3 Hz, 1H), 7.46 (ddd, *J* = 7.6, 7.6, 1.1 Hz, 1H), 7.43-7.42 (m, 1H), 7.35-7.33 (m, 1H), 1.34 (s, 12H).

<sup>13</sup>C NMR (CDCl<sub>3</sub>, 125 MHz): δ 162.3, 154.5, 139.6, 135.9, 134.8, 129.7, 127.9, 127.7, 127.2, 126.4, 125.8, 120.2, 84.7, 25.1.

<sup>11</sup>B NMR (CDCl<sub>3</sub>, 193 MHz): δ 31.8.

HRMS (ESI+): Calculated for C<sub>21</sub>H<sub>19</sub>BO<sub>4</sub>SNa ([M+Na]<sup>+</sup>), 377.0999; found 377.0995.

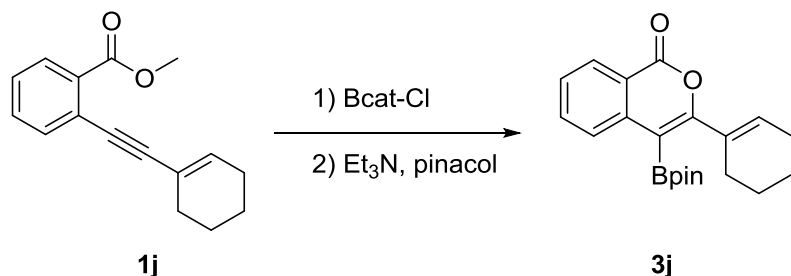

**3-(cyclohex-1-en-1-yl)-4-(4,4,5,5-tetramethyl-1,3,2-dioxaborolan-2-yl)-1H-isochromen-1-one (3j).** A vial was charged with **1j** (0.120 g, 0.500 mmol, 1.00 equiv) and 0.5 mL toluene. A separate vial equipped with a stir bar was charged with *B*-chlorocatecholborane (0.108 g, 0.700 mmol, 1.40 equiv). The resulting homogenous solution from the first vial was then added dropwise over c.a. 2 min to the boron-containing vial, which stirred for 24 h at 100 °C. At this time, the reaction mixture was cooled to room temperature and then diluted with 0.5 mL toluene. A separate vial was then charged with pinacol (0.177 g, 1.50 mmol, 3.00 equiv) and Et<sub>3</sub>N (1.0 mL, 7.5 mmol, 15 equiv). The reaction mixture was added dropwise over c.a. 2 min to this vial, and the resulting mixture stirred for 1 h at room temperature. The solution was concentrated in vacuo and the resulting residue was purified by column chromatography using an elution gradient from 100% hexanes to 20% EtOAc/hexanes. Product-containing fractions were combined and concentrated in vacuo, and volatiles were removed at c.a. 10 mTorr for 18 h to afford **3j** as a yellow oil (0.14 g, 77% yield).

<sup>1</sup>H NMR (CDCl<sub>3</sub>, 600 MHz): δ 8.25 (app d, *J* = 7.8 Hz, 1H), 7.72 (app d, *J* = 8.0 Hz, 1H), 7.64 (app td, *J* = 7.6, 1.2 Hz, 1H), 7.41 (app td, *J* = 7.6, 1.0 Hz, 1H), 2.41-2.39 (m, 2H), 7.43-7.42 (m, 2H), 2.14-2.12 (m, 2H), 1.74-1.70 (m, 2H), 1.65-1.61 (m, 2H), 1.35 (s, 12H).

<sup>13</sup>C NMR (CDCl<sub>3</sub>, 125 MHz): δ 163.0, 162.7, 139.8, 134.6, 134.6, 132.0, 129.5, 127.5, 126.2, 120.2, 84.2, 26.3, 25.5, 25.0, 22.2, 21.7.

<sup>11</sup>B NMR (CDCl<sub>3</sub>, 193 MHz): δ 31.3.

HRMS (ESI+): Calculated for C<sub>21</sub>H<sub>25</sub>BO<sub>4</sub>Na ([M+Na]<sup>+</sup>), 375.1747; found 375.1744.

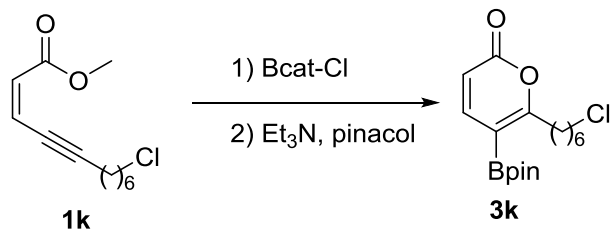

**6-(6-chlorohexyl)-5-(4,4,5,5-tetramethyl-1,3,2-dioxaborolan-2-yl)-2H-pyran-2-one (3k).** A vial was charged with **1k** (0.179 g, 0.780 mmol, 1.00 equiv) and 0.8 mL toluene. A separate vial equipped with a stir bar was charged with *B*-chlorocatecholborane (0.170 g, 1.10 mmol, 1.40 equiv). The resulting homogenous solution from the first vial was then added dropwise over c.a. 2 min to the boron-containing vial, which stirred for 24 h at 100 °C. At this time, the reaction mixture was cooled to room temperature and then diluted with 0.8 mL toluene. A separate vial

was then charged with pinacol (0.272 g, 2.30 mmol, 3.00 equiv) and Et<sub>3</sub>N (1.6 mL, 12 mmol, 15 equiv). This mixture was added to the reaction mixture dropwise over c.a. 2 min to this vial, and the resulting mixture stirred for 1 h at room temperature. The solution was concentrated in vacuo and the resulting residue was purified by column chromatography using an elution gradient from 100% hexanes to 15% EtOAc/hexanes. Product-containing fractions were combined and concentrated in vacuo, and volatiles were removed at c.a. 10 mTorr for 18 h to afford **3k** as a yellow oil that solidified upon standing (0.11 g, 41% yield).

<sup>1</sup>H NMR (CDCl<sub>3</sub>, 600 MHz): δ 7.51 (d, *J* = 9.4 Hz, 1H), 6.07 (d, *J* = 9.4 Hz, 1H), 3.48 (t, *J* = 6.7 Hz, 2H), 2.78 (t, *J* = 7.6 Hz, 2H), 1.72 (m, 2H), 1.64 (quin, *J* = 7.6, 2H), 1.42 (t, *J* = 7.8 Hz, 2H), 1.32 (quin, *J* = 7.5 Hz, 2H), 1.26 (s, 12H).

<sup>13</sup>C NMR (CDCl<sub>3</sub>, 125 MHz): δ 163.0, 162.7, 139.8, 134.6, 134.6, 132.0, 129.5, 127.5, 126.2, 120.2, 84.2, 26.3, 25.5, 25.0, 22.2, 21.7.

<sup>11</sup>B NMR (CDCl<sub>3</sub>, 193 MHz): δ 30.2.

HRMS (ESI<sup>+</sup>): Calculated for C<sub>17</sub>H<sub>26</sub>ClBO<sub>4</sub> ([M]<sup>+</sup>), 340.1616; found 340.1609.

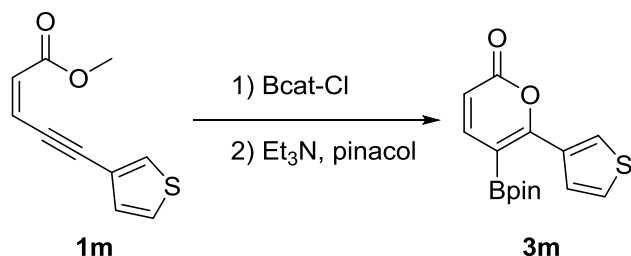

**5-(4,4,5,5-tetramethyl-1,3,2-dioxaborolan-2-yl)-6-(thiophen-3-yl)-2H-pyran-2-one (3m).** A vial was charged with **1m** (0.096 g, 0.50 mmol, 1.0 equiv) and 0.5 mL toluene. A separate vial equipped with a stir bar was charged with *B*-chlorocatecholborane (0.108 g, 0.500 mmol, 1.40 equiv). The resulting homogenous solution from the first vial was then added dropwise over c.a. 2 min to the boron-containing vial, which stirred for 21 h at 100 °C. At this time, the reaction mixture was cooled to room temperature and then diluted with 0.5 mL toluene. A separate vial was then charged with pinacol (0.177 g, 1.50 mmol, 3.00 equiv) and Et<sub>3</sub>N (1.0 mL, 7.5 mmol, 15 equiv). This mixture was added to the reaction mixture dropwise over c.a. 2 min to this vial, and the resulting mixture stirred for 1 h at room temperature. The solution was concentrated in vacuo and the resulting residue was purified by column chromatography using an elution gradient from 100% hexanes to 20% EtOAc/hexanes. Product-containing fractions were combined and concentrated in vacuo, and volatiles were removed at c.a. 10 mTorr for 18 h to afford **3m** as a yellow oil that solidified upon standing (0.090 g, 59% yield).

<sup>1</sup>H NMR (CDCl<sub>3</sub>, 600 MHz): δ 8.07 (d, *J* = 2.1 Hz, 1H), 7.66 (d, *J* = 9.4 Hz, 1H), 7.56 (d, *J* = 5.0 Hz, 1H), 7.28 (dd, *J* = 5.1, 3.0 Hz, 1H), 6.20 (d, *J* = 9.4 Hz, 1H), 1.29 (s, 12H).

<sup>13</sup>C NMR (CDCl<sub>3</sub>, 125 MHz): δ 164.1, 161.7, 149.6, 134.6, 129.6, 128.1, 125.1, 112.6, 84.6, 24.8.

<sup>11</sup>B NMR (CDCl<sub>3</sub>, 193 MHz): δ 30.3.

HRMS (ESI<sup>+</sup>): Calculated for C<sub>15</sub>H<sub>17</sub>BO<sub>4</sub>SNa ([M+Na]<sup>+</sup>), 327.0841; found 327.0834.



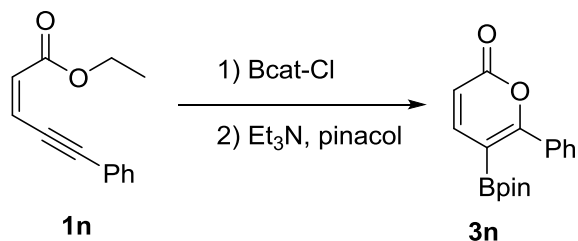

**6-phenyl-5-(4,4,5,5-tetramethyl-1,3,2-dioxaborolan-2-yl)-2H-pyran-2-one (3n).** A vial was charged with **1n** (0.070 g, 0.35 mmol, 1.0 equiv) and 0.4 mL of toluene. A separate vial equipped with a stir bar was charged with *B*-chlorocatecholborane (0.075 g, 0.49 mmol, 1.4 equiv). The resulting homogenous solution from the first vial was then added dropwise over c.a. 2 min to the boron-containing vial, which stirred for 24 h at 100 °C. At this time, the reaction mixture was cooled to room temperature and then diluted with 0.4 mL toluene. A separate vial was then charged with pinacol (0.124 g, 1.05 mmol, 3.00 equiv) and Et<sub>3</sub>N (0.70 mL, 5.3 mmol, 15 equiv). This mixture was added to the reaction mixture dropwise over c.a. 2 min to this vial, and the resulting mixture stirred for 1 h at room temperature. The solution was concentrated in vacuo and the resulting residue was purified by column chromatography using an elution gradient from 100% hexanes to 25% EtOAc/hexanes. Product-containing fractions were combined and concentrated in vacuo, and volatiles were removed at c.a. 10 mTorr for 18 h to afford **3n** as a yellow crystalline solid (0.049 g, 47% yield).

<sup>1</sup>H NMR (CDCl<sub>3</sub>, 600 MHz): δ 7.65–7.63 (m, 3H), 7.47 (app t, *J* = 7.4 Hz, 1H), 7.39 (app t, *J* = 7.7 Hz, 2H), 6.27 (d, *J* = 9.3 Hz, 1H), 1.25 (s, 12H).

<sup>13</sup>C NMR (CDCl<sub>3</sub>, 125 MHz): δ 169.6, 162.1, 148.9, 133.3, 131.0, 129.5, 127.9, 113.0, 84.5, 24.7.

<sup>11</sup>B NMR (CDCl<sub>3</sub>, 193 MHz): δ 30.8.

HRMS (ESI<sup>+</sup>): Calculated for C<sub>17</sub>H<sub>19</sub>BO<sub>4</sub>Na ([M+Na]<sup>+</sup>), 321.1277; found 321.1283.

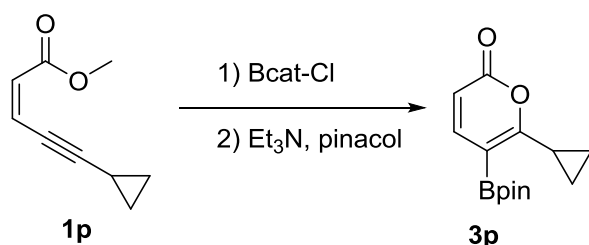

**6-cyclopropyl-5-(4,4,5,5-tetramethyl-1,3,2-dioxaborolan-2-yl)-2H-pyran-2-one (3p).** A vial was charged with **1p** (0.100 g, 0.670 mmol, 1.00 equiv) and 0.7 mL toluene. A separate vial equipped with a stir bar was charged with *B*-chlorocatecholborane (0.144 g, 0.930 mmol, 1.40 equiv). The resulting homogenous solution from the first vial was then added dropwise over c.a. 2 min to the boron-containing vial, which stirred for 24 h at 100 °C. At this time, the reaction mixture was cooled to room temperature and then diluted with 0.7 mL toluene. A separate vial was then charged with pinacol (0.237 g, 2.01 mmol, 3.00 equiv) and Et<sub>3</sub>N (1.4 mL, 10. mmol, 15 equiv). This mixture was added to the reaction mixture dropwise over c.a. 2 min to this vial, and the resulting mixture stirred for 1 h at room temperature. The solution was concentrated in vacuo

and the resulting residue was purified by column chromatography using an elution gradient from 100% hexanes to 15% EtOAc/hexanes. Product-containing fractions were combined and concentrated in vacuo, and volatiles were removed at c.a. 10 mTorr for 18 h to afford **3p** as a yellow solid (0.098 g, 56% yield).

$^1\text{H}$  NMR ( $\text{CDCl}_3$ , 600 MHz):  $\delta$  7.52 (d,  $J = 9.2$  Hz, 1H), 6.00 (d,  $J = 9.4$  Hz, 1H), 2.73 (m, 1H), 1.28 (s, 12H), 1.21 (m, 2H), 0.99 (m, 2H).

$^{13}\text{C}$  NMR ( $\text{CDCl}_3$ , 125 MHz):  $\delta$  176.3, 162.1, 149.3, 110.4, 84.1, 24.9, 13.9, 10.2.

$^{11}\text{B}$  NMR ( $\text{CDCl}_3$ , 193 MHz):  $\delta$  30.9.

HRMS (CI) Calculated for  $\text{C}_{14}\text{H}_{19}\text{BO}_4$  ( $[\text{M}]^+$ ), 262.1379; found 262.1368.

## F. Multigram Scale Preparation of **3g**

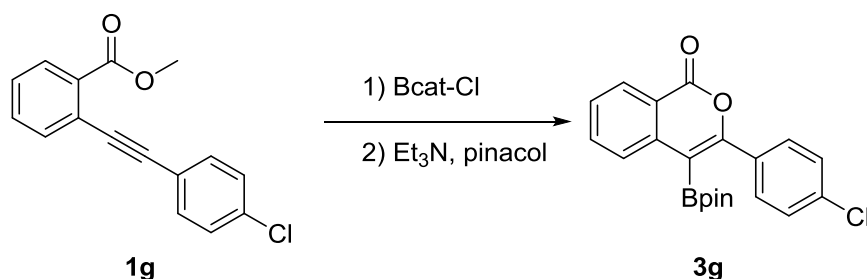

In a nitrogen-filled glove box, a Schlenk bomb was charged with a solution of **1g** (2.50 g, 9.23 mmol, 1.00 equiv) in 4.6 mL toluene via pipette. A solution of *B*-chlorocatecholborane (1.99 g, 12.9 mmol, 1.40 equiv) in 4.6 mL toluene was then added via pipette. The Schlenk bomb was then sealed, brought outside of the glove box, and cooled to  $-78$  °C using an isopropanol/dry ice bath. The headspace in the Schlenk bomb was then removed under reduced pressure (c.a. 10 mTorr for 10 sec) before resealing. The solution was then stirred under static vacuum for 24 h at  $100$  °C in an oil bath. At this time, the reaction mixture was cooled to room temperature and returned to the glove box. A solution of pinacol (3.27 g, 27.7 mmol, 3.00 equiv) and Et<sub>3</sub>N (19.2 mL, 139 mmol, 15.0 equiv) was then added to the reaction mixture over 5 min and the resulting solution was stirred for 1.5 h at room temperature. The contents of the Schlenk bomb were then filtered over a bed of celite and rinsed with toluene ( $3 \times 20$  mL), and the filtrate was concentrated in vacuo. The resulting residue was purified by column chromatography using an elution gradient from 100% hexanes to 15% EtOAc/hexanes. Product-containing fractions were combined and concentrated in vacuo, and volatiles were removed at c.a. 10 mTorr for 18 h to afford **3g** as an off-white solid (2.5 g, 71% yield). Spectral data were identical to those previously obtained for this compound (see page S20).

## G. Synthesis of 12

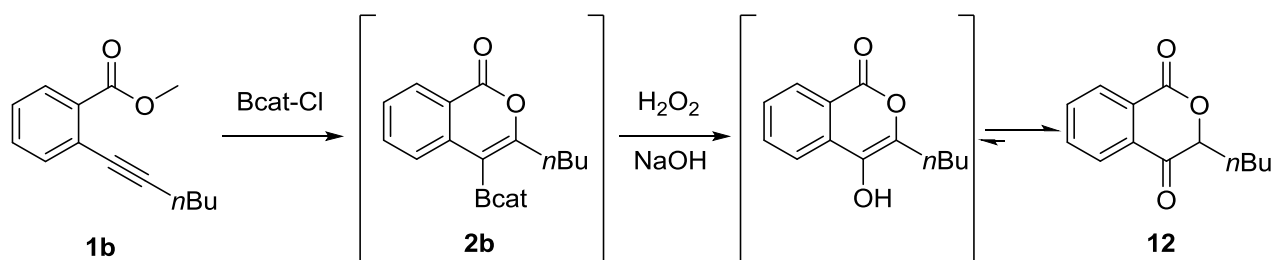

**3-butylisochromane-1,4-dione (4)**. The initial oxyboration step was performed in a  $\text{N}_2$ -filled glove box. A vial was charged with **1b** (0.108 g, 0.500 mmol, 1.00 equiv) and 0.5 mL toluene. A separate vial equipped with a stir bar was charged with *B*-chlorocatecholborane (0.108 g, 0.700 mmol, 1.40 equiv). The resulting homogenous solution from the first vial was then added dropwise over c.a. 2 min to the boron-containing vial, which stirred for 24 h at 100 °C. The reaction mixture was then cooled to room temperature and taken out of the glovebox before 1 mL of methanol,  $\text{NaOH}$  (0.30 mL of a 3.0 M solution, 0.80 mmol, 1.6 equiv) and  $\text{H}_2\text{O}_2$  (82  $\mu\text{L}$  of a 30 wt% solution, 0.80 mmol, 1.6 equiv) were added. The reaction mixture was stirred for 2 h, then diluted with 100 mL EtOAc and washed with  $\text{NH}_4\text{Cl}$  (1  $\times$  20 mL), water (1  $\times$  20 mL), brine (1  $\times$  20 mL), dried over  $\text{Na}_2\text{SO}_4$ , filtered, and concentrated in vacuo. The residue was purified by column chromatography using an elution gradient from 100% hexanes to 30% EtOAc/hexanes. Product-containing fractions were combined and concentrated in vacuo, and volatiles were removed at c.a. 10 mTorr for 18 h to afford **12** as a yellow oil. (0.12 g, 56% yield).

$^1\text{H}$  NMR ( $\text{CDCl}_3$ , 600 MHz):  $\delta$  8.27 (m, 1H), 8.06 (dd,  $J = 7.6, 1.0$  Hz, 1H), 7.87-7.81 (m, 2H), 5.09 (dd,  $J = 7.5, 4.7$  Hz, 1H), 2.06-1.99 (m, 2H), 1.49-1.44 (m, 2H), 1.39-1.30 (m, 2H), 0.89 (t,  $J = 7.3$  Hz, 3H).

$^{13}\text{C}$  NMR ( $\text{CDCl}_3$ , 125 MHz):  $\delta$  192.7, 162.0, 135.7, 134.7, 131.6, 130.7, 128.3, 126.0, 84.6, 33.8, 26.7, 22.4, 13.9.

HRMS (ESI<sup>+</sup>): Calculated for  $\text{C}_{13}\text{H}_{18}\text{NO}_3$  ( $[\text{M}+\text{NH}_4]^+$ ), 236.1287; found 236.1281.

## H. Suzuki Cross-Coupling of 3g to Generate 13

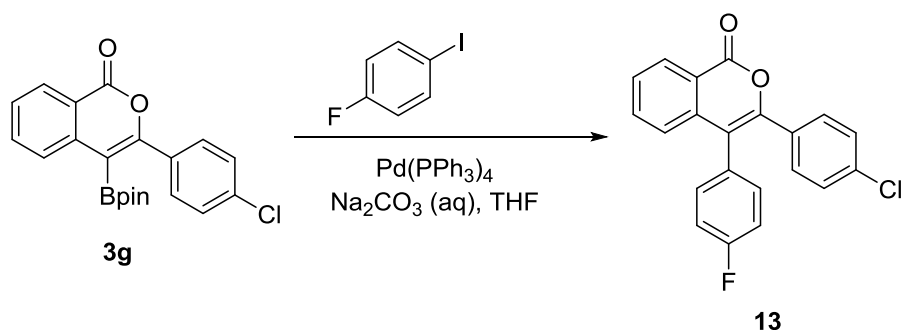

**3-(4-chlorophenyl)-4-(4-fluorophenyl)-1H-isochromen-1-one (13)**. This procedure was performed in a  $\text{N}_2$ -filled glove box. A 20 mL vial was charged with  $\text{Pd}(\text{PPh}_3)_4$  (21 mg, 0.020 mmol, 0.030 equiv), THF (4.0 mL), 4-fluoroiodobenzene (69  $\mu\text{L}$ , 0.60 mmol, 1.0 equiv), **3g** (0.229 g, 0.599 mmol, 2.00 equiv), sodium carbonate (1.2 mL of a 2.0 M aqueous solution, 2.3

mmol), and a stir bar. The vial was then quickly sealed and brought out of the glove box. The vial was then heated to 75 °C for 17 h. At this time, TLC (80:20 hex:EtOAc) indicated complete consumption of starting material. The reaction mixture was cooled to room temperature, then diluted with 100 mL EtOAc and washed with water (2 × 20 mL), brine (1 × 20 mL), dried over Na<sub>2</sub>SO<sub>4</sub>, filtered, and concentrated in vacuo. The residue was purified by column chromatography using an elution gradient from 100% hexanes to 20% EtOAc/hexanes. Product-containing fractions were combined and concentrated in vacuo, and volatiles were removed at c.a. 10 mTorr for 18 h to afford **13** as a yellow solid (0.12 g, 58% yield).

<sup>1</sup>H NMR (CDCl<sub>3</sub>, 600 MHz): δ 8.43 (d, *J* = 7.8 Hz, 1H), 7.70 (t, *J* = 7.6 Hz, 1H), 7.58 (t, *J* = 7.5 Hz, 1H), 7.29-7.16 (m, 9H).

<sup>13</sup>C NMR (CDCl<sub>3</sub>, 125 MHz): δ 163.7, 162.0, 161.8, 150.2, 138.6, 135.3, 135.0, 133.0, 132.97, 130.6, 129.9, 128.6, 128.4, 125.3, 120.6, 116.7, 116.5.

HRMS (ESI<sup>+</sup>): Calculated for C<sub>21</sub>H<sub>12</sub>ClFO<sub>2</sub>Na ([M+Na]<sup>+</sup>), 373.0407; found 373.0414.

### I. Synthesis of Borylated Isoxazole Product 15

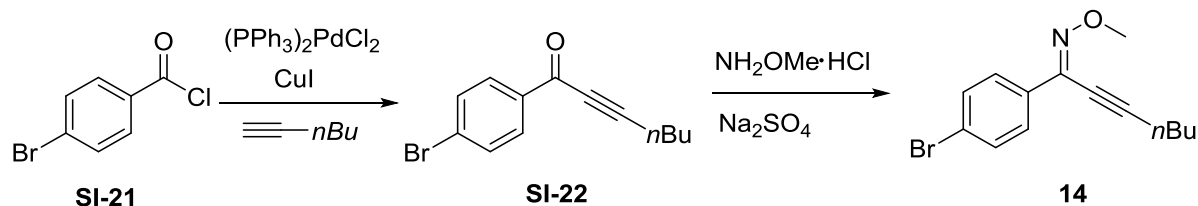

**1-(4-bromophenyl)hept-2-yn-1-one (SI-22)** was prepared according to a literature procedure<sup>16</sup> in 86% yield. <sup>1</sup>H NMR (CDCl<sub>3</sub>, 600 MHz): δ 7.99 (d, *J* = 8.5 Hz, 2H), 7.62 (d, *J* = 8.5 Hz, 2H), 2.50 (t, *J* = 7.1 Hz, 2H), 1.66 (quin, *J* = 7.3 Hz, 2H), 1.50 (sxt, *J* = 7.4 Hz, 2H), 0.97 (t, *J* = 7.3 Hz, 3H). This spectrum is in agreement with previously reported spectral data.<sup>17</sup>

**(Z)-1-(4-bromophenyl)hept-2-yn-1-one O-methyl oxime (14)** was prepared according to a modified literature procedure.<sup>18</sup> A round-bottom flask was charged with H<sub>2</sub>NOMe·HCl (0.38 g, 4.5 mmol, 2.0 equiv), Na<sub>2</sub>SO<sub>4</sub> (0.64 g, 4.5 mmol, 2.0 equiv), and a stir bar. The solids were suspended in 8 mL of MeOH. Pyridine (0.68 mL, 8.4 mmol, 3.7 equiv) and then ketone **SI-23** (0.60 g, 2.3 mmol, 1.0 equiv) were consecutively added. The reaction was stirred at 25 °C for 23 h without special precautions for oxygen or moisture. The reaction was then quenched with 30 mL DI water and extracted with EtOAc (3 × 60 mL). The combined organic layers were washed with brine (30 mL), dried over Na<sub>2</sub>SO<sub>4</sub>, filtered, and concentrated in vacuo. The residue was purified by column chromatography using an elution gradient from 100% hexanes to 40% DCM/hexanes. Product-containing fractions were combined and concentrated in vacuo to afford **14** as light yellow oil (0.27 g, 41% isolated yield).

<sup>1</sup>H NMR (CDCl<sub>3</sub>, 600 MHz): δ 7.70 (d, *J* = 8.5 Hz, 2H), 7.49 (d, *J* = 8.5 Hz, 2H), 4.07 (s, 3H), 2.54 (t, *J* = 7.2 Hz, 2H), 1.65 (quin, *J* = 7.3 Hz, 2H), 1.51-1.47 (m, 2H), 0.96 (t, *J* = 7.3 Hz, 3H).

<sup>13</sup>C NMR (CDCl<sub>3</sub>, 125 MHz): δ 139.4, 133.0, 131.6, 128.1, 123.9, 104.6, 71.2, 63.2, 30.5, 22.2, 19.6, 13.7.

HRMS (ESI<sup>+</sup>): Calculated for C<sub>14</sub>H<sub>17</sub>NBrO ([M+H]<sup>+</sup>), 294.0493; found 294.0493.

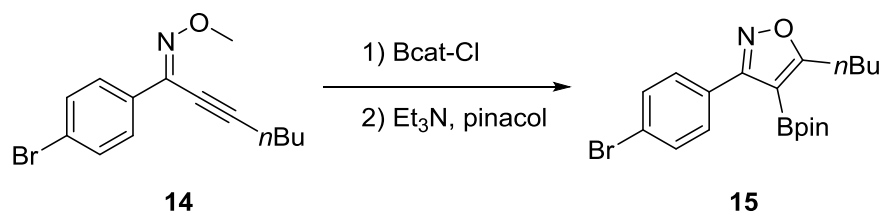

**3-(4-bromophenyl)-5-butyl-4-(4,4,5,5-tetramethyl-1,3,2-dioxaborolan-2-yl)isoxazole (15).** A vial was charged with **14** (0.147 g, 0.500 mmol, 1.00 equiv) and 0.5 mL  $d_8$ -toluene [Note: the deuterated toluene was used to monitor this unoptimized reaction by  $^1\text{H}$  and  $^{11}\text{B}$  NMR spectroscopy]. A separate vial was charged with *B*-chlorocatecholborane (0.108 g, 0.700 mmol, 1.40 equiv). The resulting homogenous solution from the first vial was then added dropwise over c.a. 2 min to the boron-containing vial, which was then transferred to a J-Young tube via pipette. The tube was then heated to 100 °C for 48 h, and subsequently to 110 °C for 48 h. A separate vial was then charged with pinacol (0.177 g, 1.50 mmol, 3.00 equiv) and  $\text{Et}_3\text{N}$  (1.0 mL, 7.5 mmol, 15 equiv). The reaction mixture was added dropwise over c.a. 2 min to this vial, and the resulting mixture stirred for 1 h at room temperature. The solution was concentrated in vacuo and purified by column chromatography using an elution gradient from 100% hexanes to 40% DCM/hexanes. Product-containing fractions were combined and concentrated in vacuo, and volatiles were removed at c.a. 10 mTorr for 18 h to afford **15** as an off-white solid (0.072 g, 35% yield).

$^1\text{H}$  NMR ( $\text{CDCl}_3$ , 600 MHz):  $\delta$  7.72 (d,  $J = 8.4$  Hz, 2H), 7.53 (d,  $J = 8.4$  Hz, 2H), 3.01 (t,  $J = 7.6$  Hz, 2H), 1.71 (quin,  $J = 7.5$  Hz, 2H), 1.41-1.37 (m, 2H), 1.29 (s, 12H), 0.94 (t,  $J = 7.4$  Hz, 3H).

$^{13}\text{C}$  NMR ( $\text{CDCl}_3$ , 125 MHz):  $\delta$  183.3, 165.2, 131.3, 130.7, 129.2, 123.8, 83.8, 30.6, 27.0, 24.8, 22.3, 13.8.

$^{11}\text{B}$  NMR ( $\text{CDCl}_3$ , 193 MHz):  $\delta$  29.9.

HRMS (ESI<sup>+</sup>): Calculated for  $\text{C}_{19}\text{H}_{25}\text{NBBBrO}_3$  ( $[\text{M}]^+$ ), 405.1115; found 405.1107.

#### J. Procedure for $^1\text{H}$ NMR observation of the rate of demethylation of methyl 2-iodobenzoate **10**

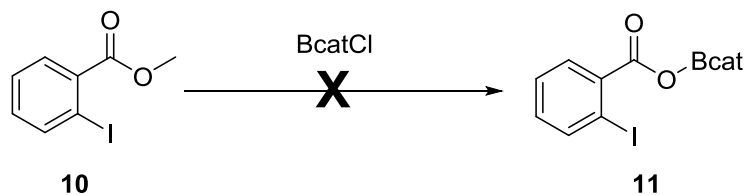

This procedure was performed in a  $\text{N}_2$ -filled glove box. A 4 mL vial was charged with *B*-chlorocatecholborane (0.108 g, 0.700 mmol, 1.40 equiv) and 0.5 mL of  $d_8$ -toluene. To this vial was sequentially added **10** (75  $\mu\text{L}$ , 0.50 mmol, 1.0 equiv) and 1,3,5-triisopropylbenzene (40.  $\mu\text{L}$ , 0.17 mmol, 0.33 equiv) via syringe. The contents of this vial were then transferred to a J-young tube, which was sealed, and then removed from the glove box. Single scan  $^1\text{H}$  and  $^{11}\text{B}$  NMR spectra were taken at time points  $t = 0$  h, 18 h, and 24 h. The resonances corresponding to **10**

were compared to the internal standard to determine the percent of **10** remaining at  $t = 24$  h (>95% **10** remaining at 24 h).

### III. References

1. Shi, C.; Zhang, Q.; Wang, K. K. *J. Org. Chem.* **1999**, *64*, 925–932.
2. Yao, T.; Larock, R. C. *J. Org. Chem.* **2003**, *68*, 5936–5942.
3. Drox, A. S.; Neidlein, U.; Anderson, S.; Seiler, P.; Dierderich, F. *Helv. Chim. Act.* **2001**, *81*, 2243–2289.
4. Duclos, S.; Stoeckli-Evans, H.; Ward, T. R. *Helv. Chim. Act.* **2001**, *84*, 3148–3161.
5. Saurabh, M.; Waldo, J. P.; Larock, R. C. *J. Org. Chem.* **2009**, *74*, 1141–1147.
6. Marchal, E.; Uriac, P.; Legouin, B.; Toupet, L.; van de Weghe, P. *Tetrahedron* **2007**, *63*, 9979–9990.
7. Hellal, M.; Bourguignon, J.-J.; Bihel, F. J.-J. *Tetrahedron Lett.* **2008**, *49*, 62–65.
8. Zhang, Q.; Shi, C.; Zhang, H.; Wang, K. K. *J. Org. Chem.* **2000**, *65*, 7977–7983.
9. Spino, C.; Rezaei, H.; Dupont-Gaudet, K.; Belanger, F. *J. Am. Chem. Soc.* **2004**, *126*, 9926–9927.
10. Paterson, I.; Paquet, T. *Org. Lett.* **2010**, *12*, 2158–2161.
11. Bates, C. G.; Pranorm, S.; Venkataraman, D. *Org. Lett.* **2004**, *6*, 1441–1444.
12. Tovar, J. D.; Swager, T. M. *J. Org. Chem.* **1999**, *64*, 6499–6504.
13. Zhdankin, V. V.; Kuposov, A. Y.; Litinov, D. N.; Ferguson, M. J.; McDonald, R.; Luu, T.; Tykwinski, R. R. *J. Org. Chem.* **2005**, *70*, 6484–6491.
14. Kusama, H.; Funami, H.; Takaya, J.; Iasawa, N. *Org. Lett.* **2004**, *6*, 605–608.
15. Park, J. H.; Bhilare, S. V.; Youn, S. W. *Org. Lett.* **2011**, *13*, 2228–2231.
16. Karpov, A. S.; Müller, T. J. J. *Org. Lett.* **2003**, *5*, 3451–3454.
17. Natte, K.; Chen, J.; Neumann, H.; Beller, M.; Wu, X-F. *Org. Biomol. Chem.* **2014**, *12*, 5590–5593.
18. Jeong, Y.; Kim, B-I.; Lee, J. K.; Ryu, J-S. *J. Org. Chem.* **2014**, *79*, 6444–6455.

### IV. NMR Spectra

7.890  
7.889  
7.877  
7.876  
7.510  
7.499  
7.498  
7.434  
7.432  
7.420  
7.409  
7.407  
7.329  
7.327  
7.316  
7.315  
7.304  
7.302  
7.258

4.146  
4.134

3.914

2.567  
2.551  
2.544  
2.526

1.969  
1.945

1.269  
1.245

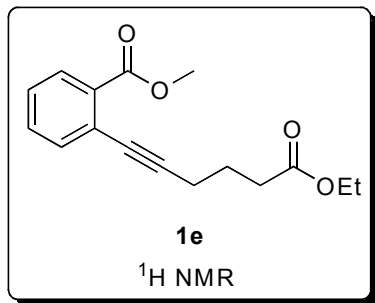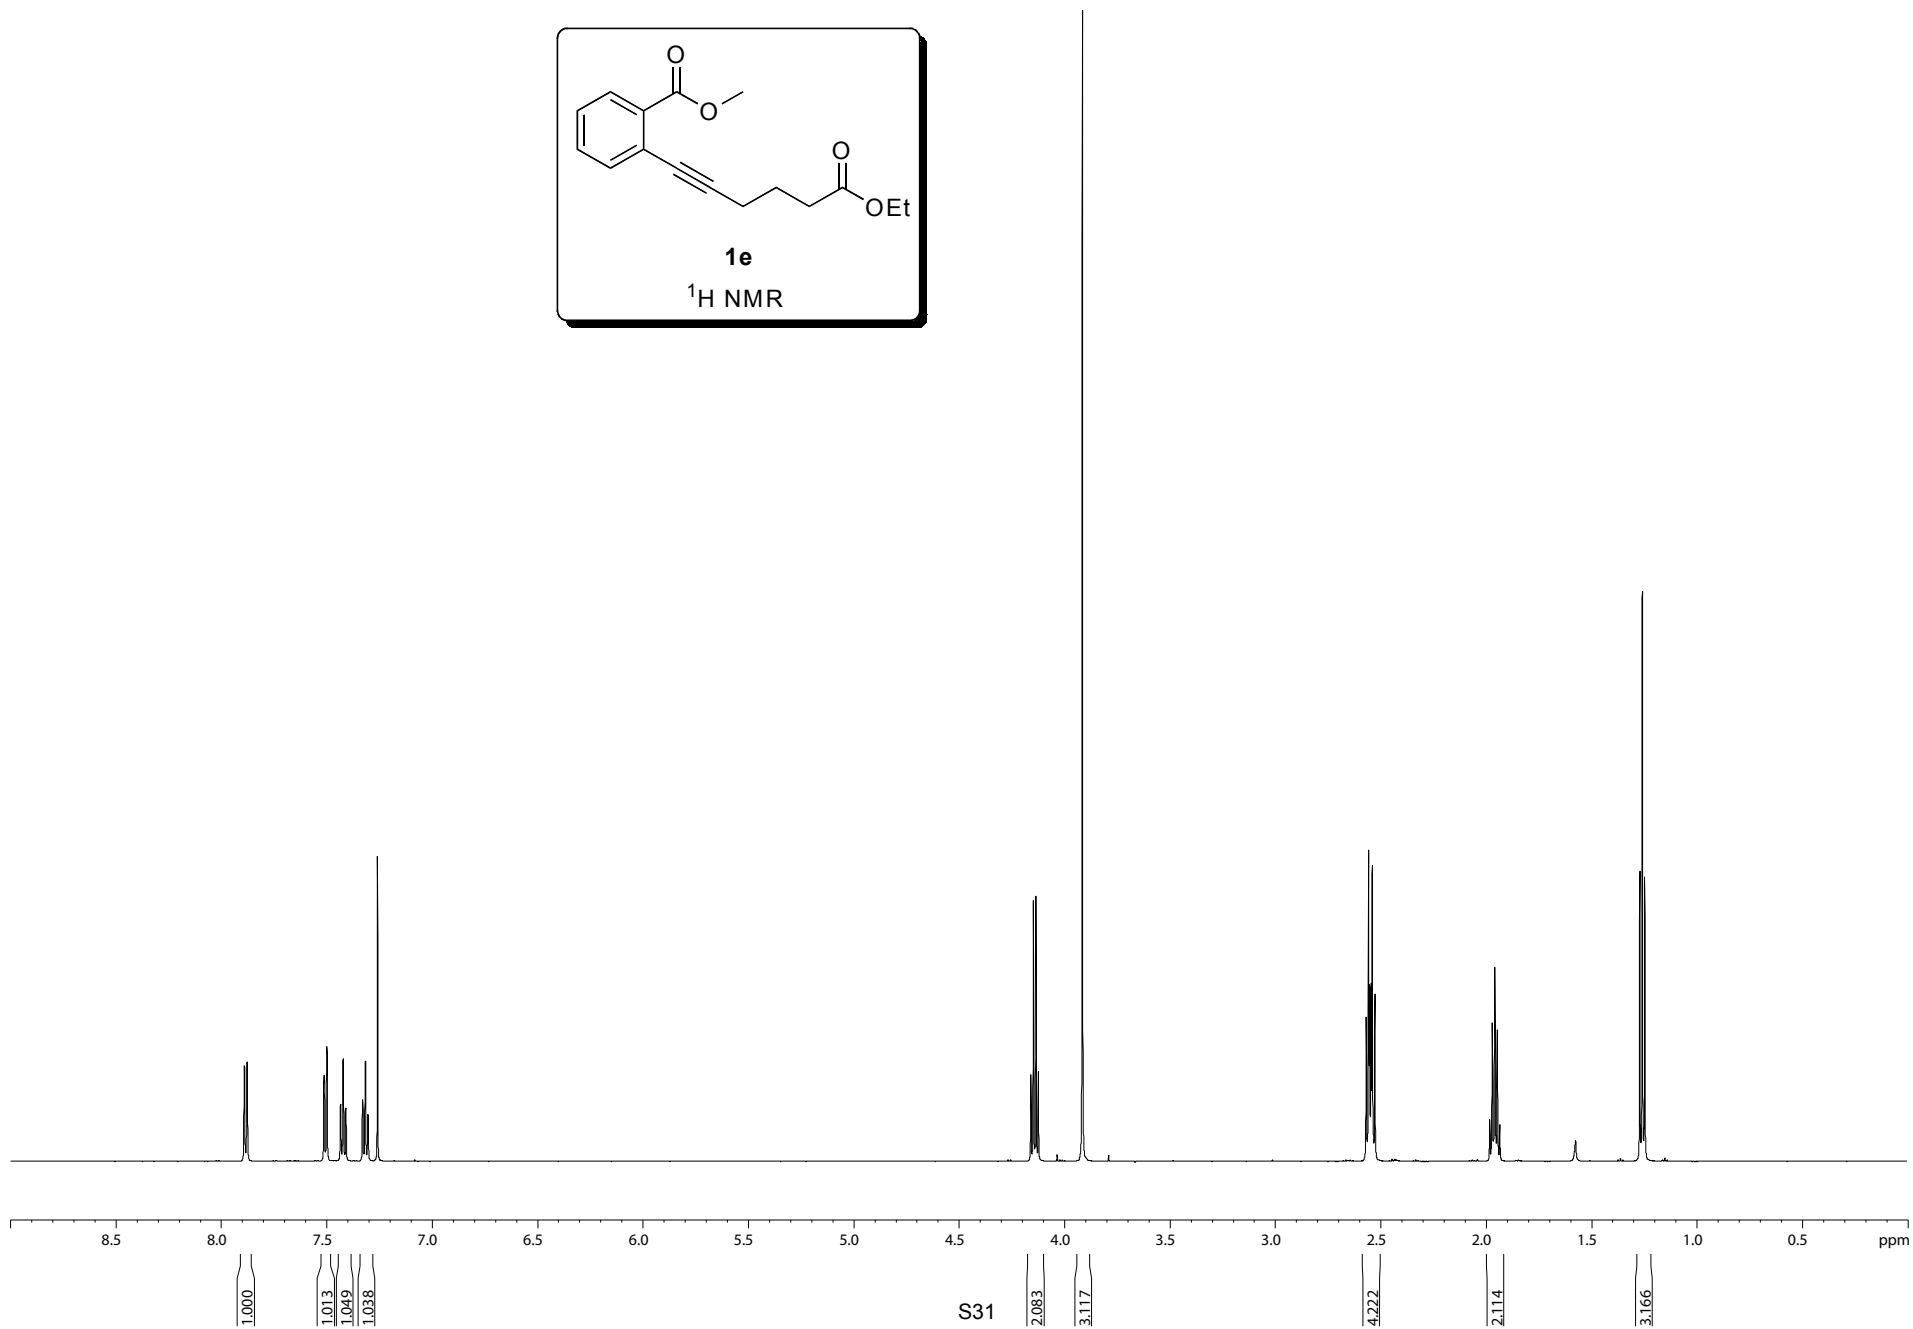

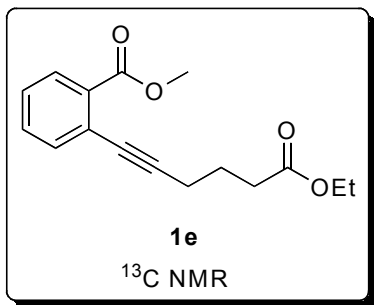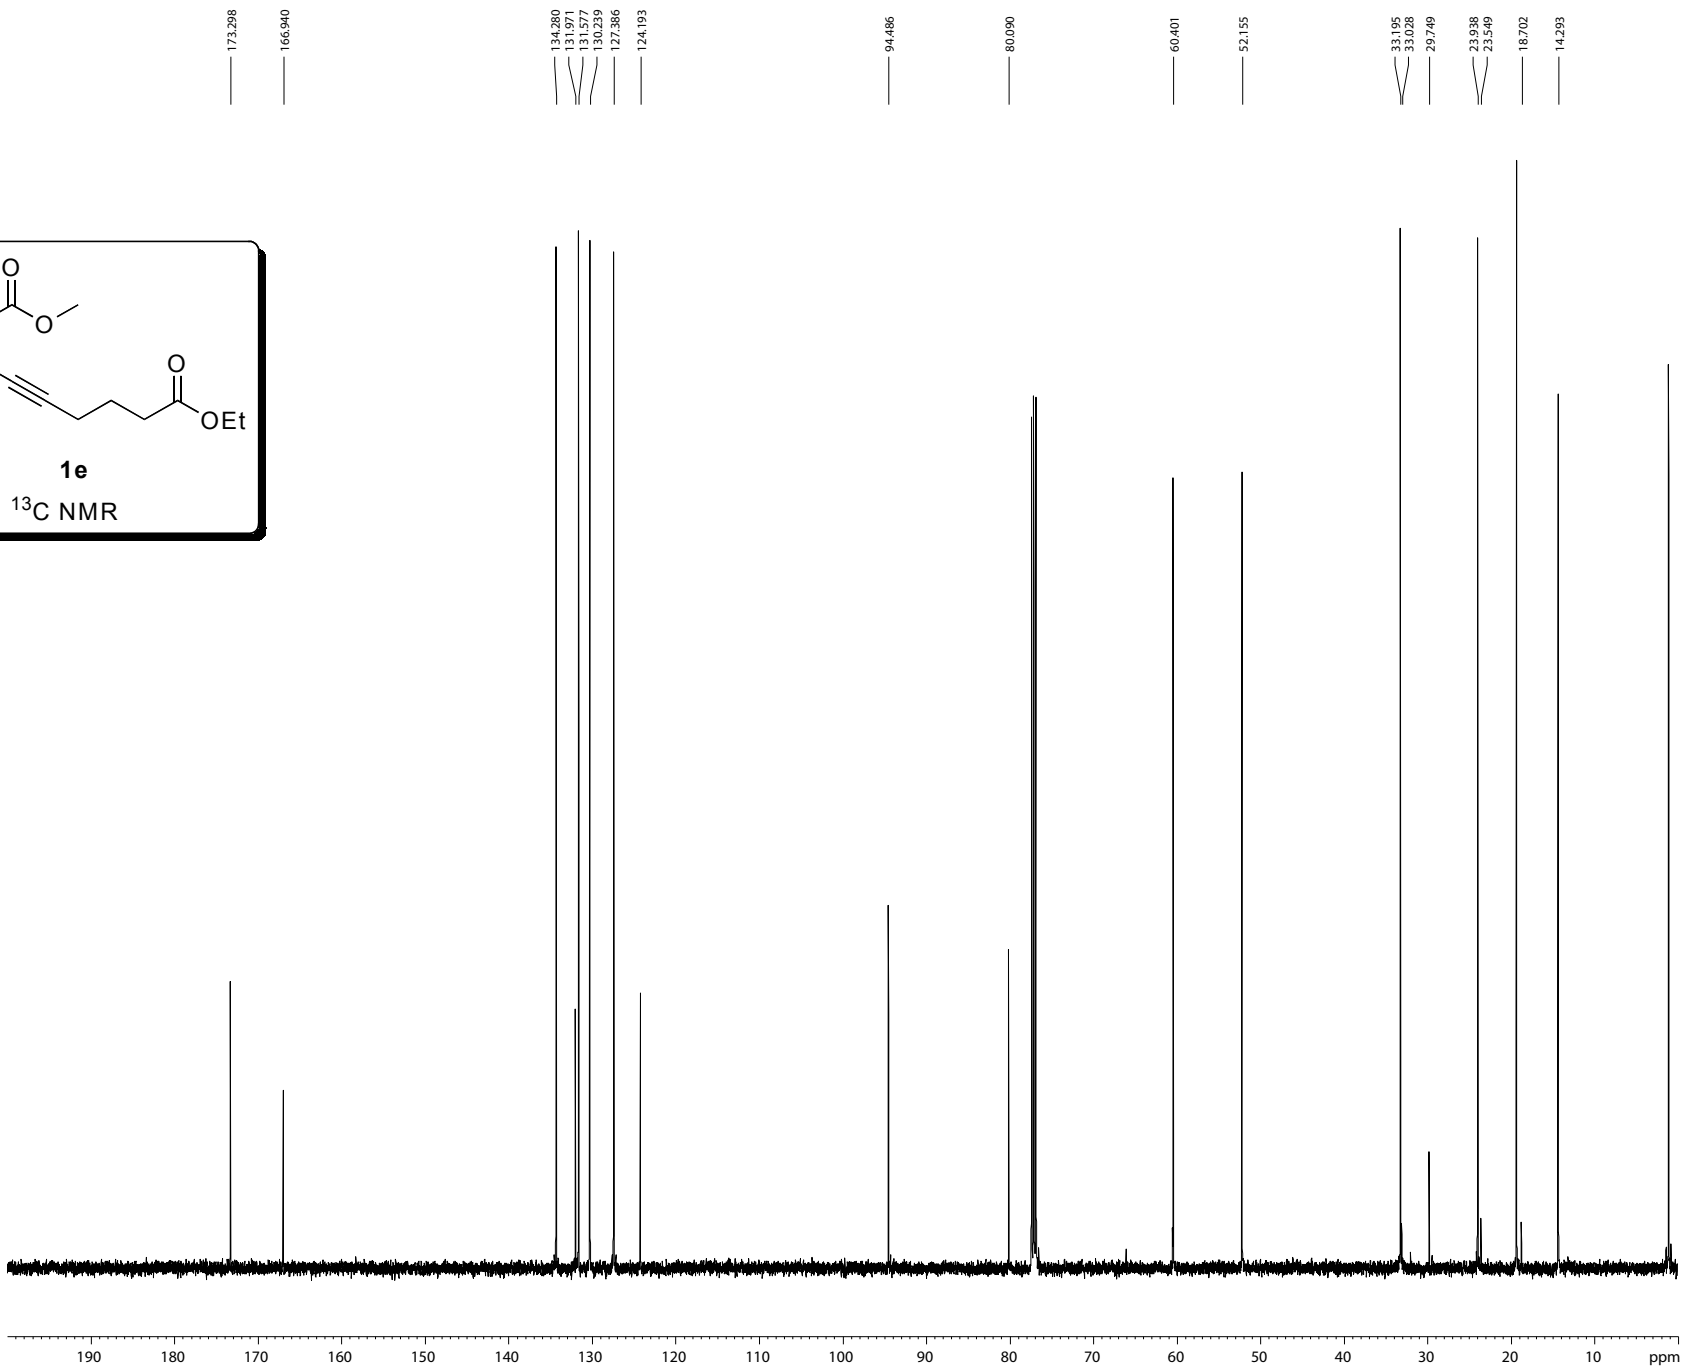



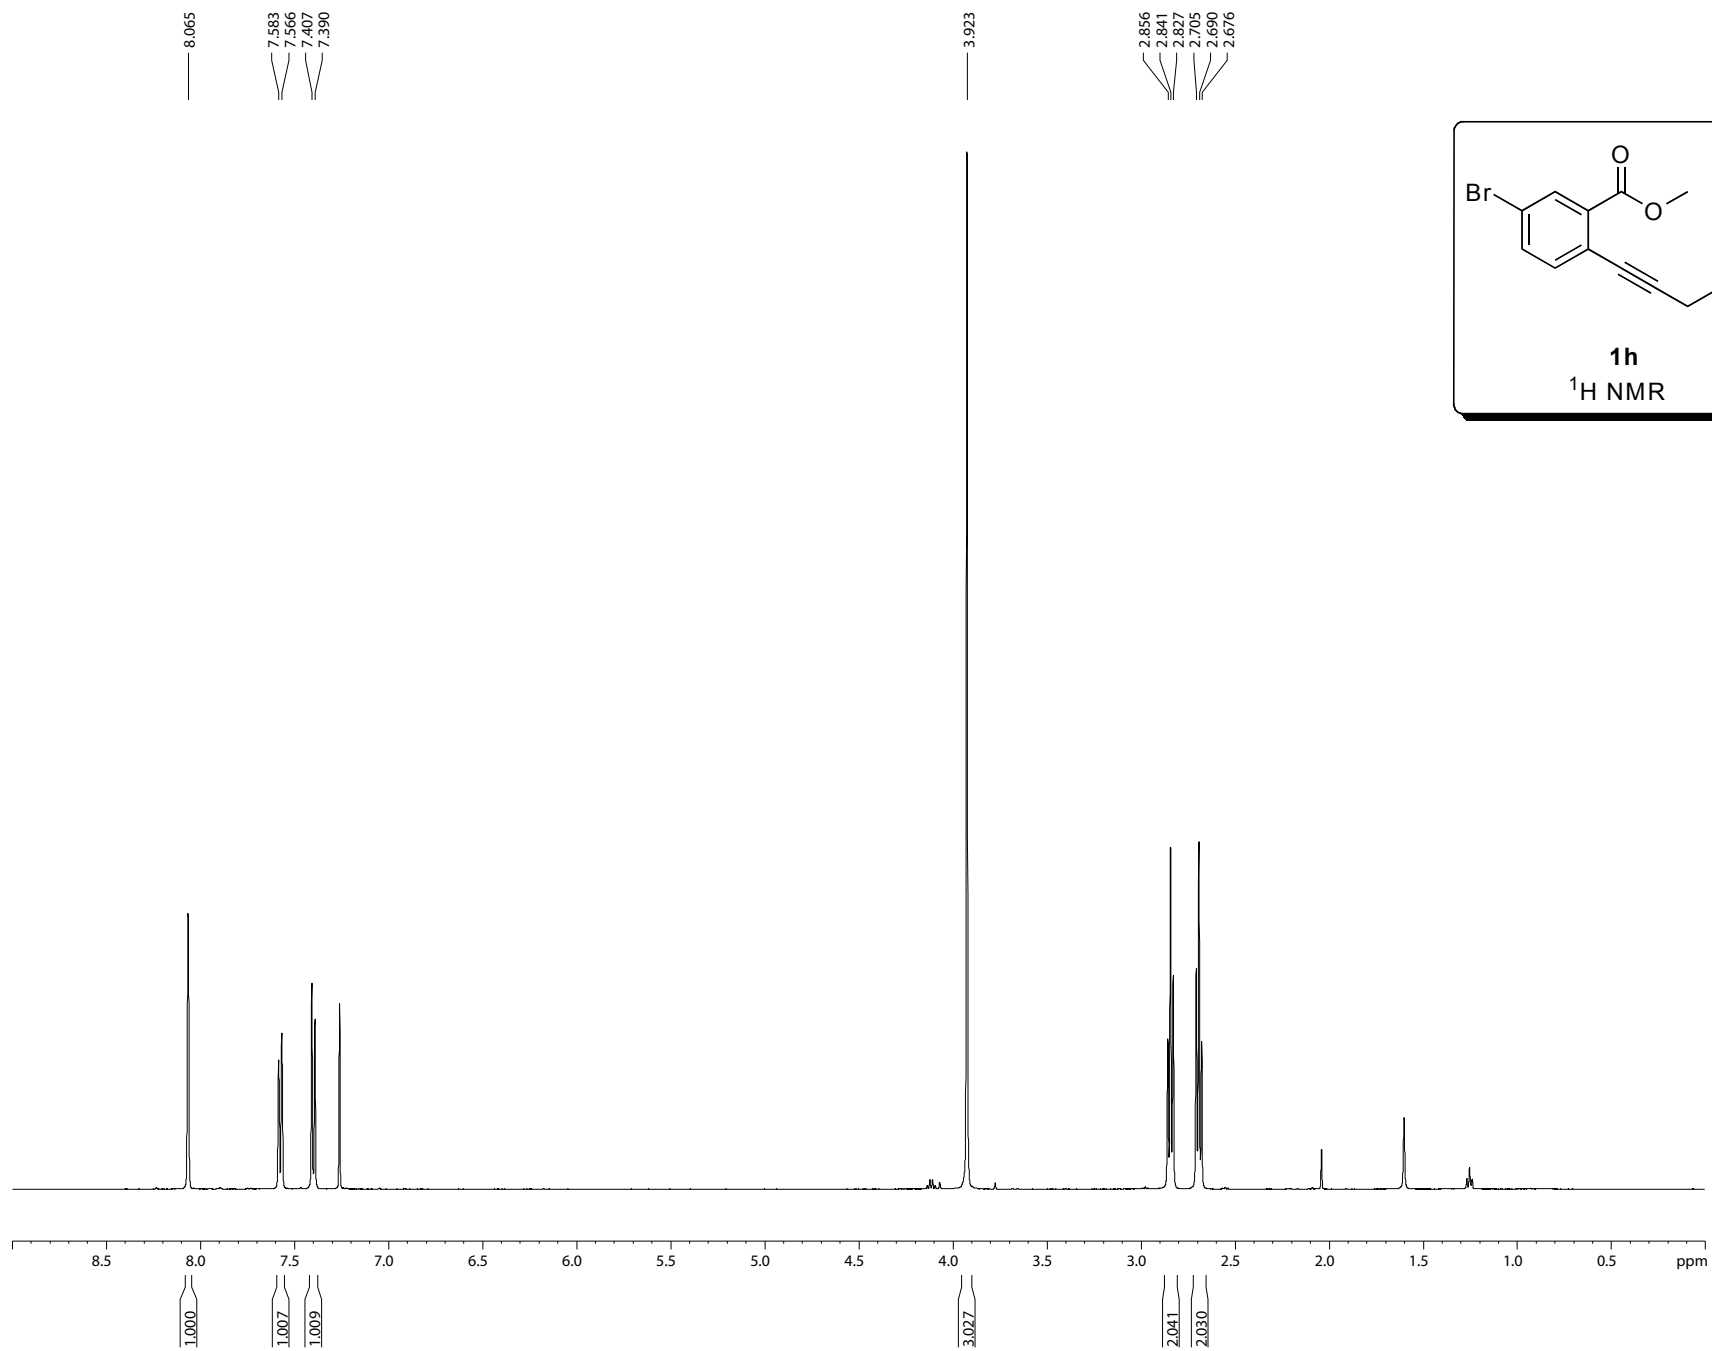

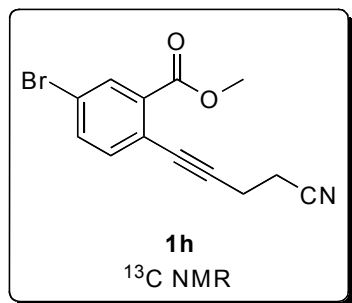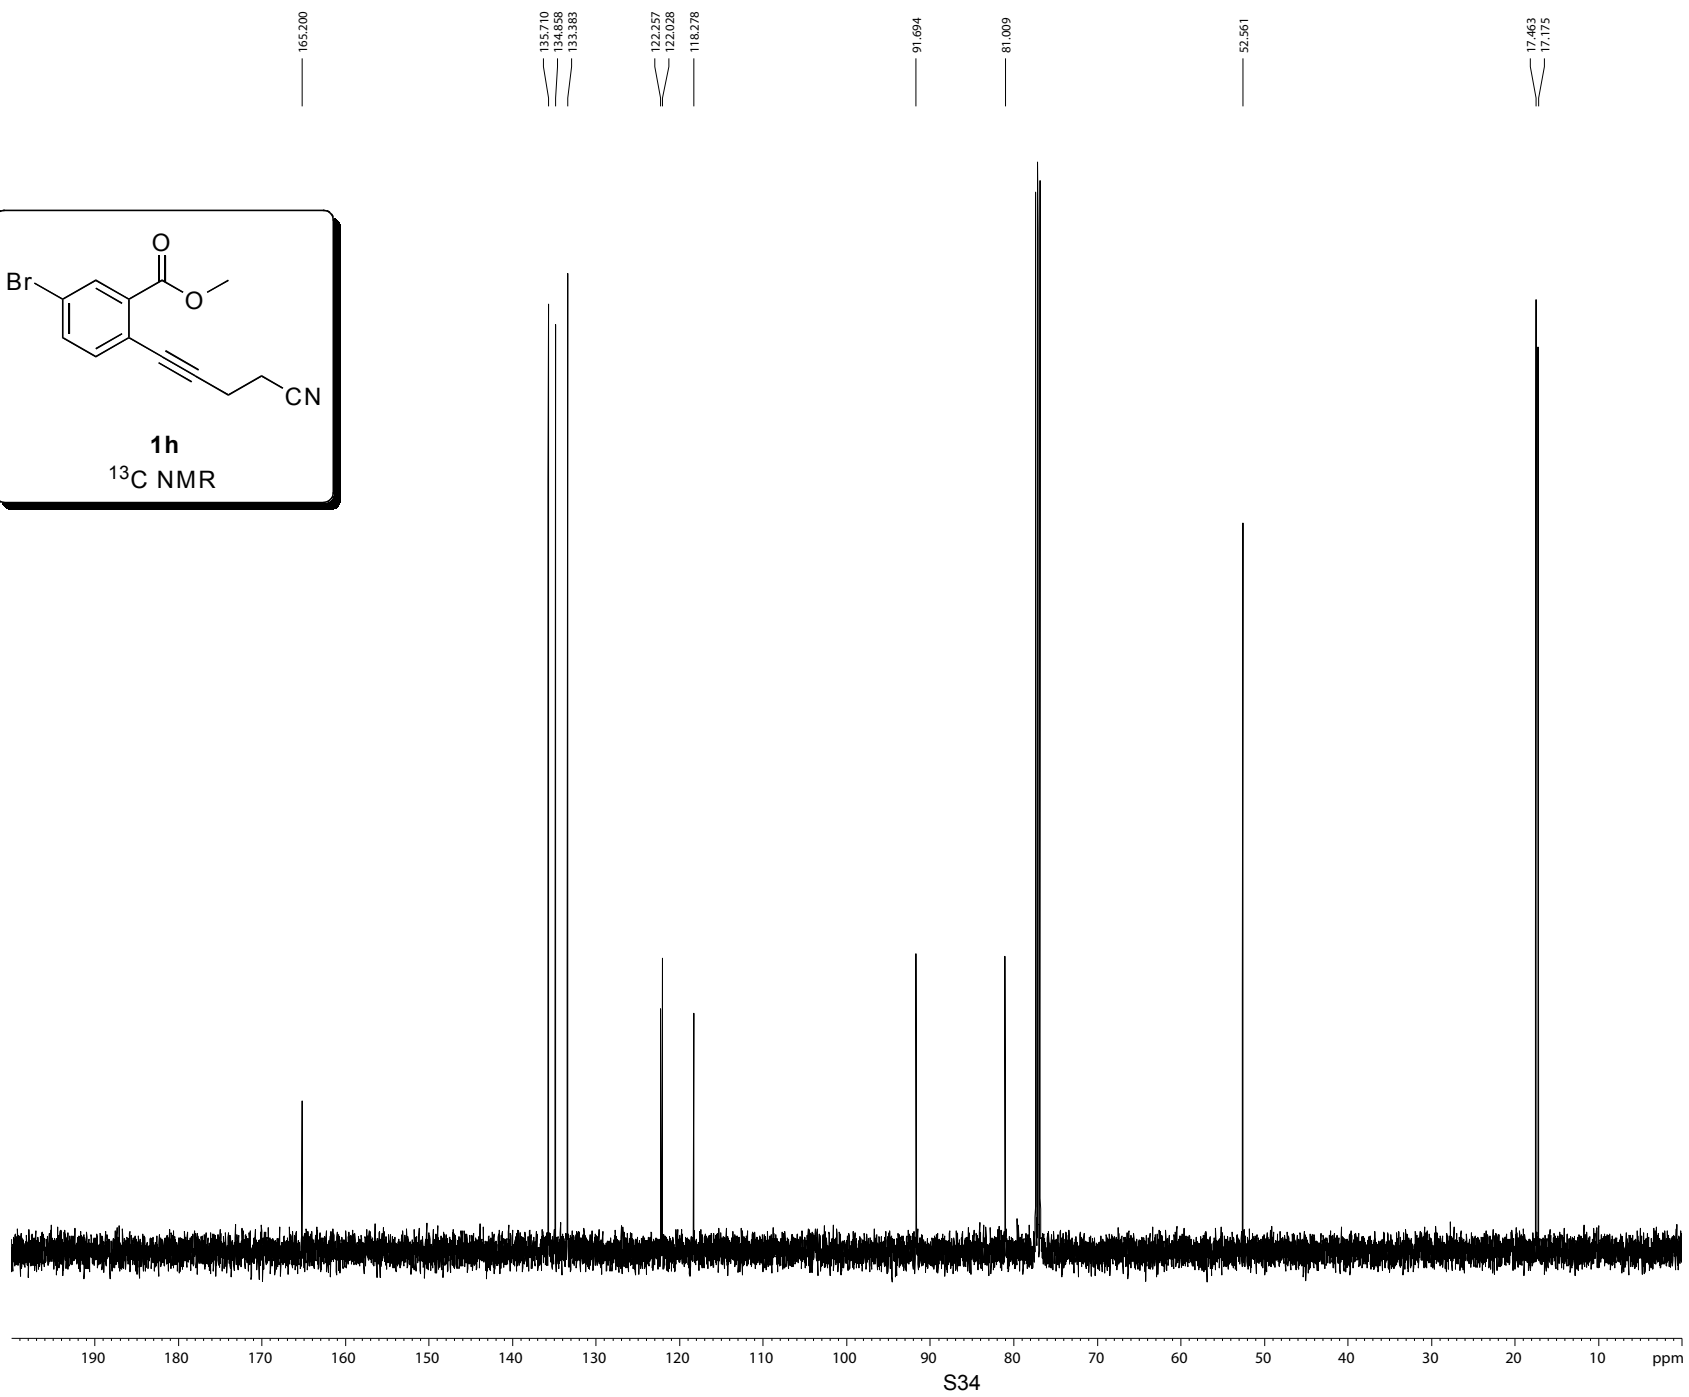

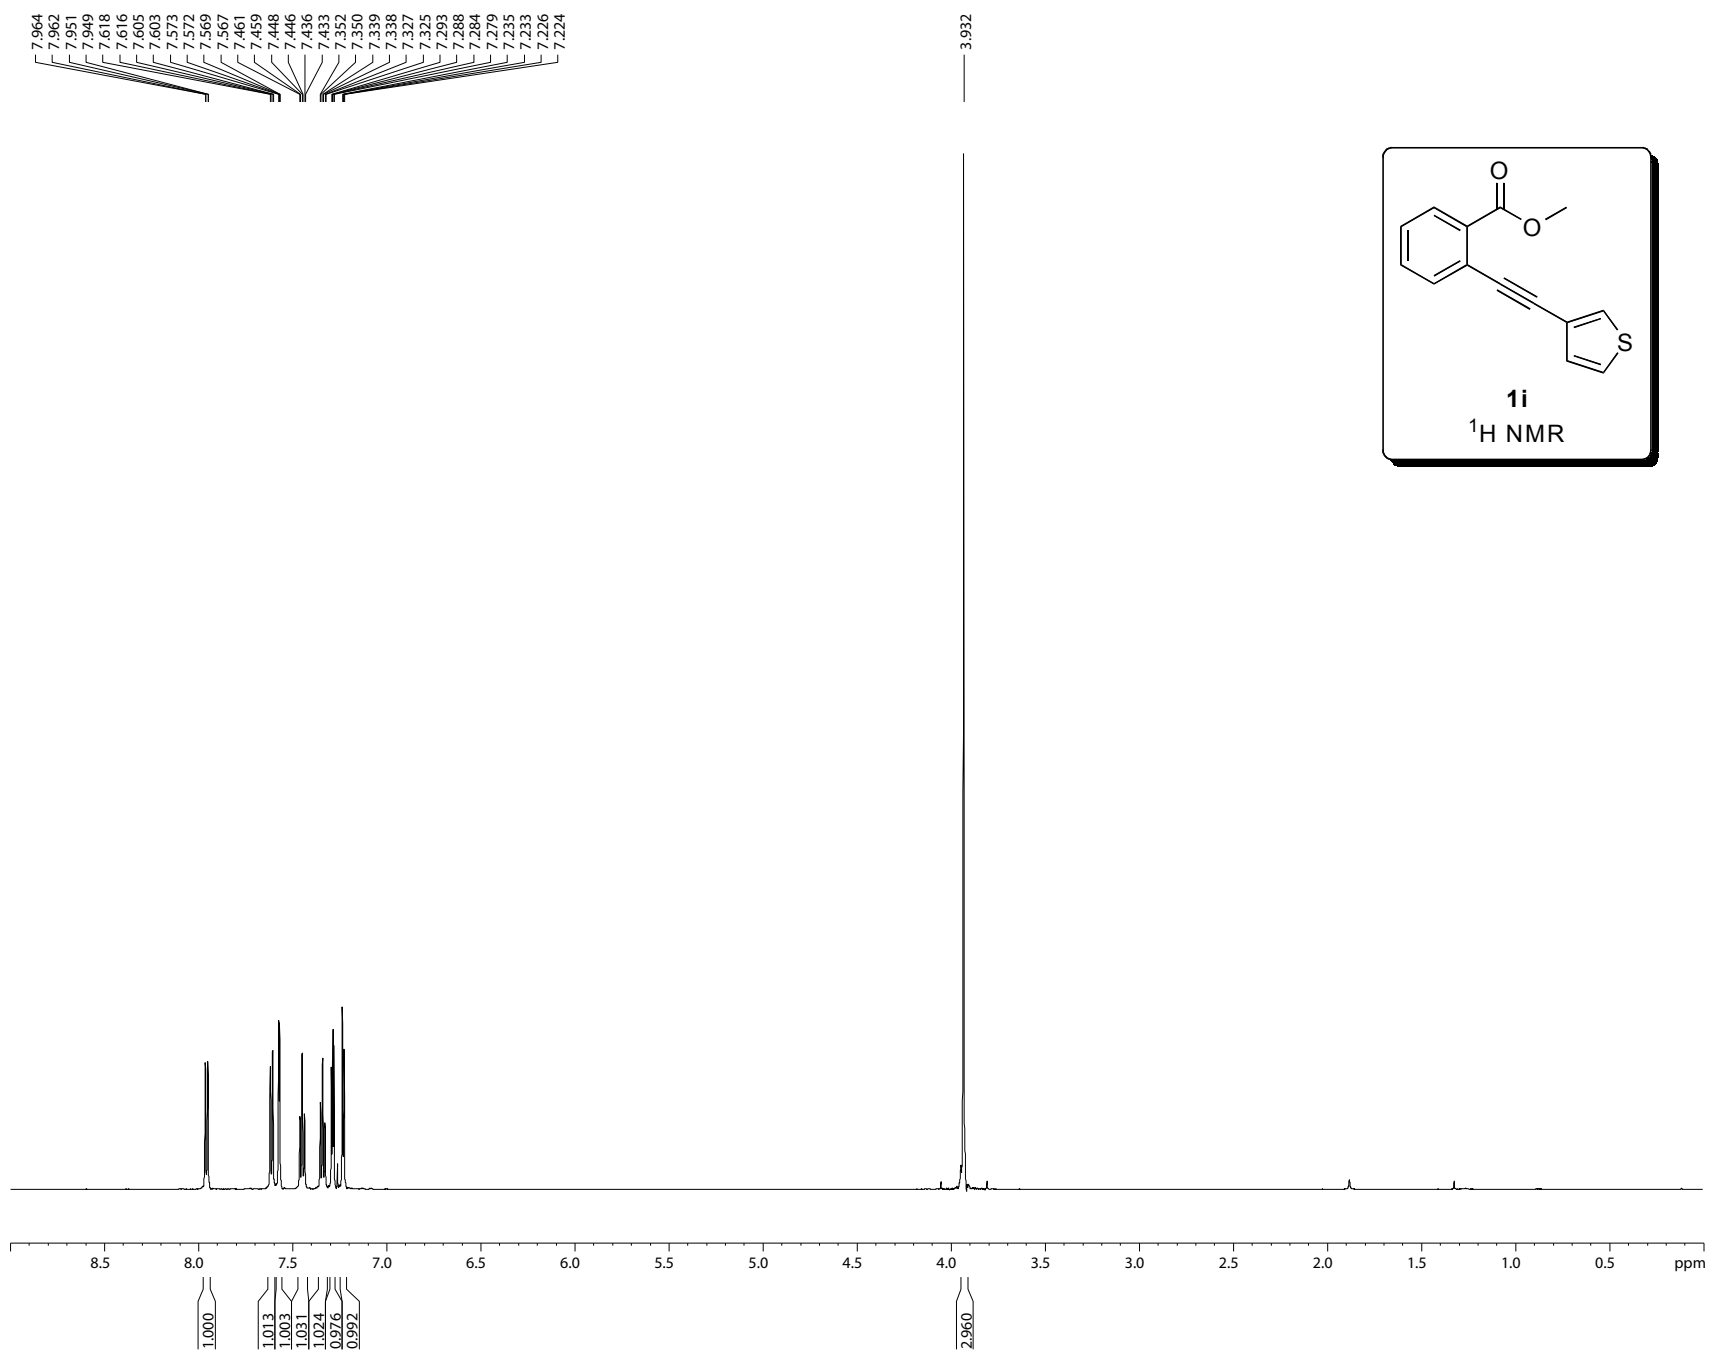

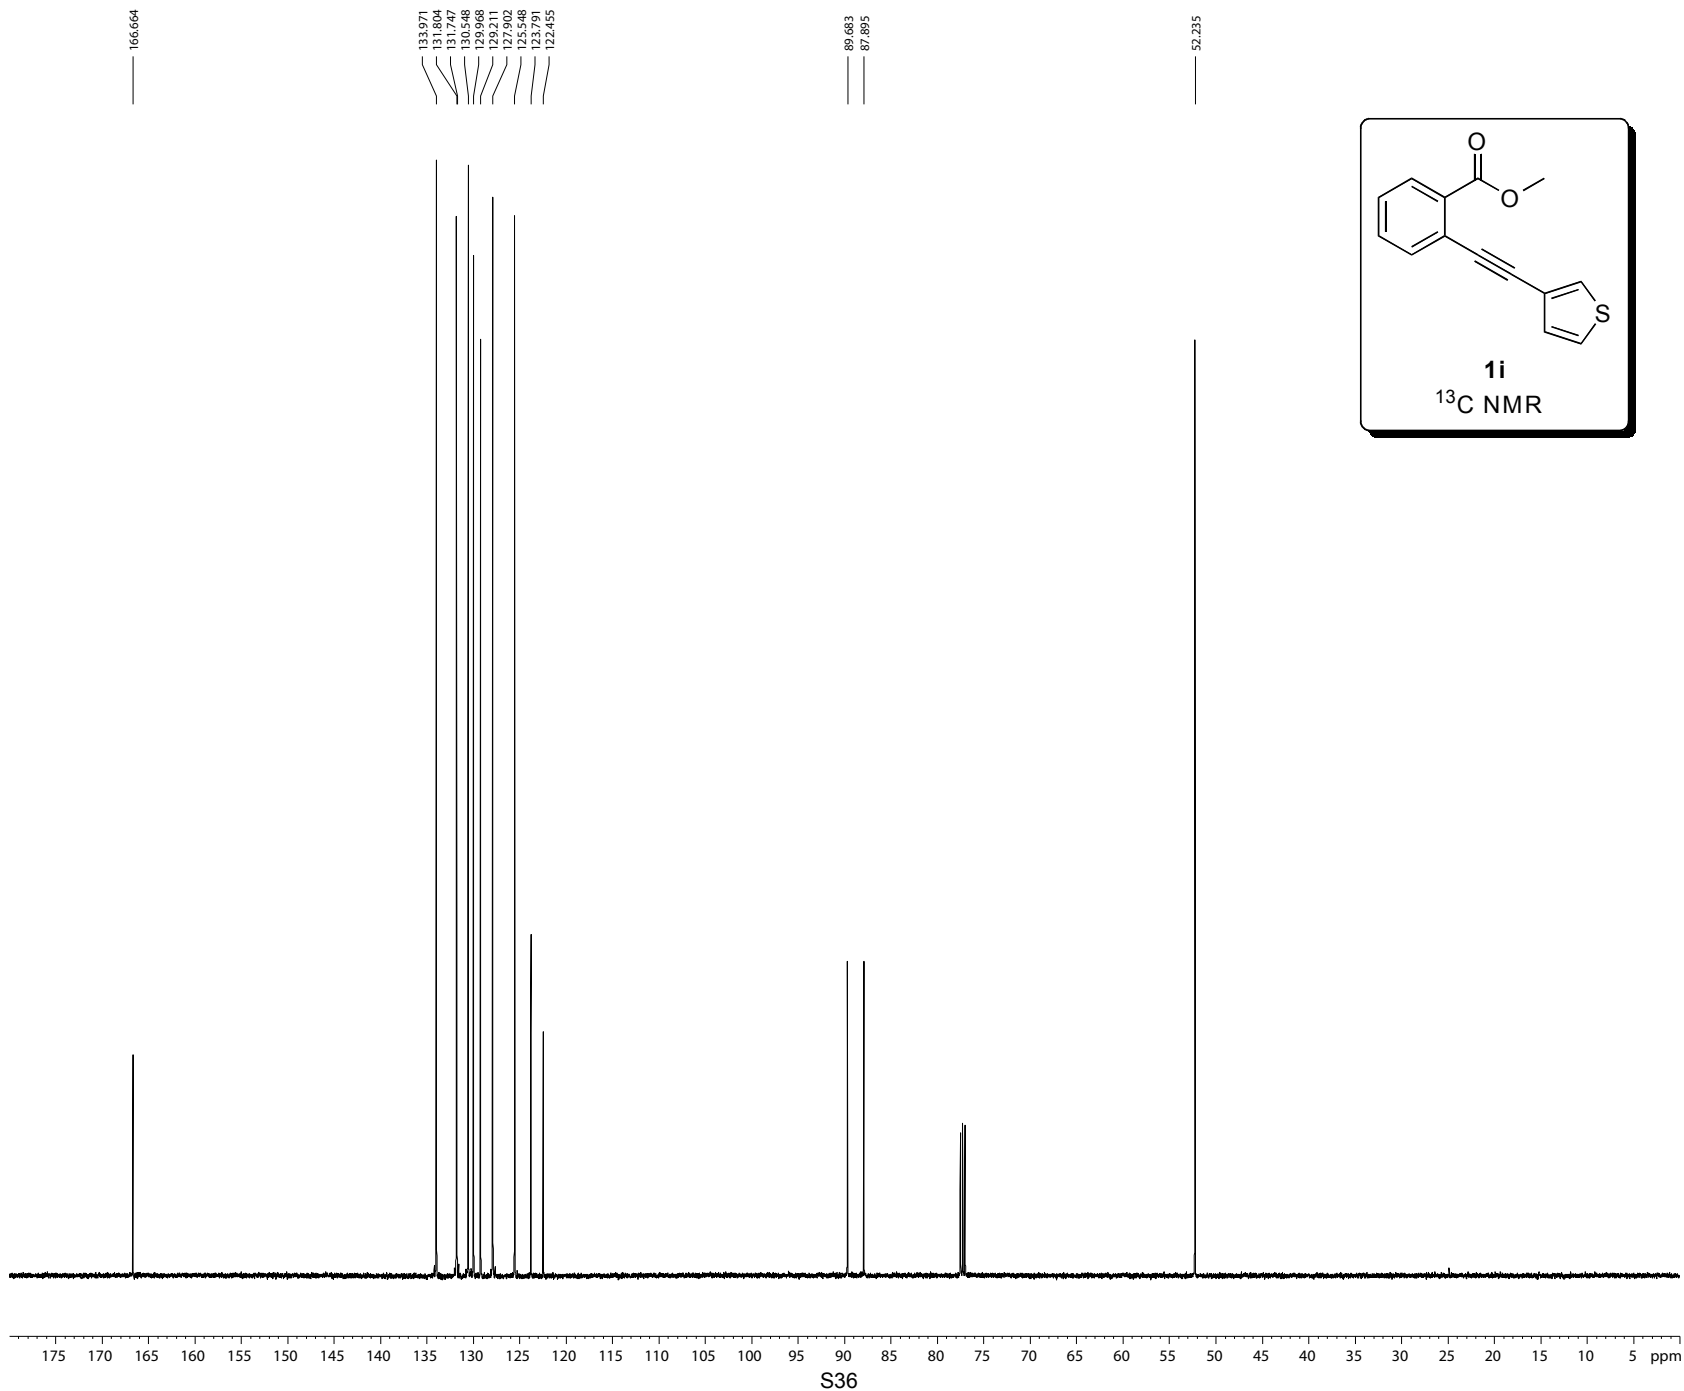

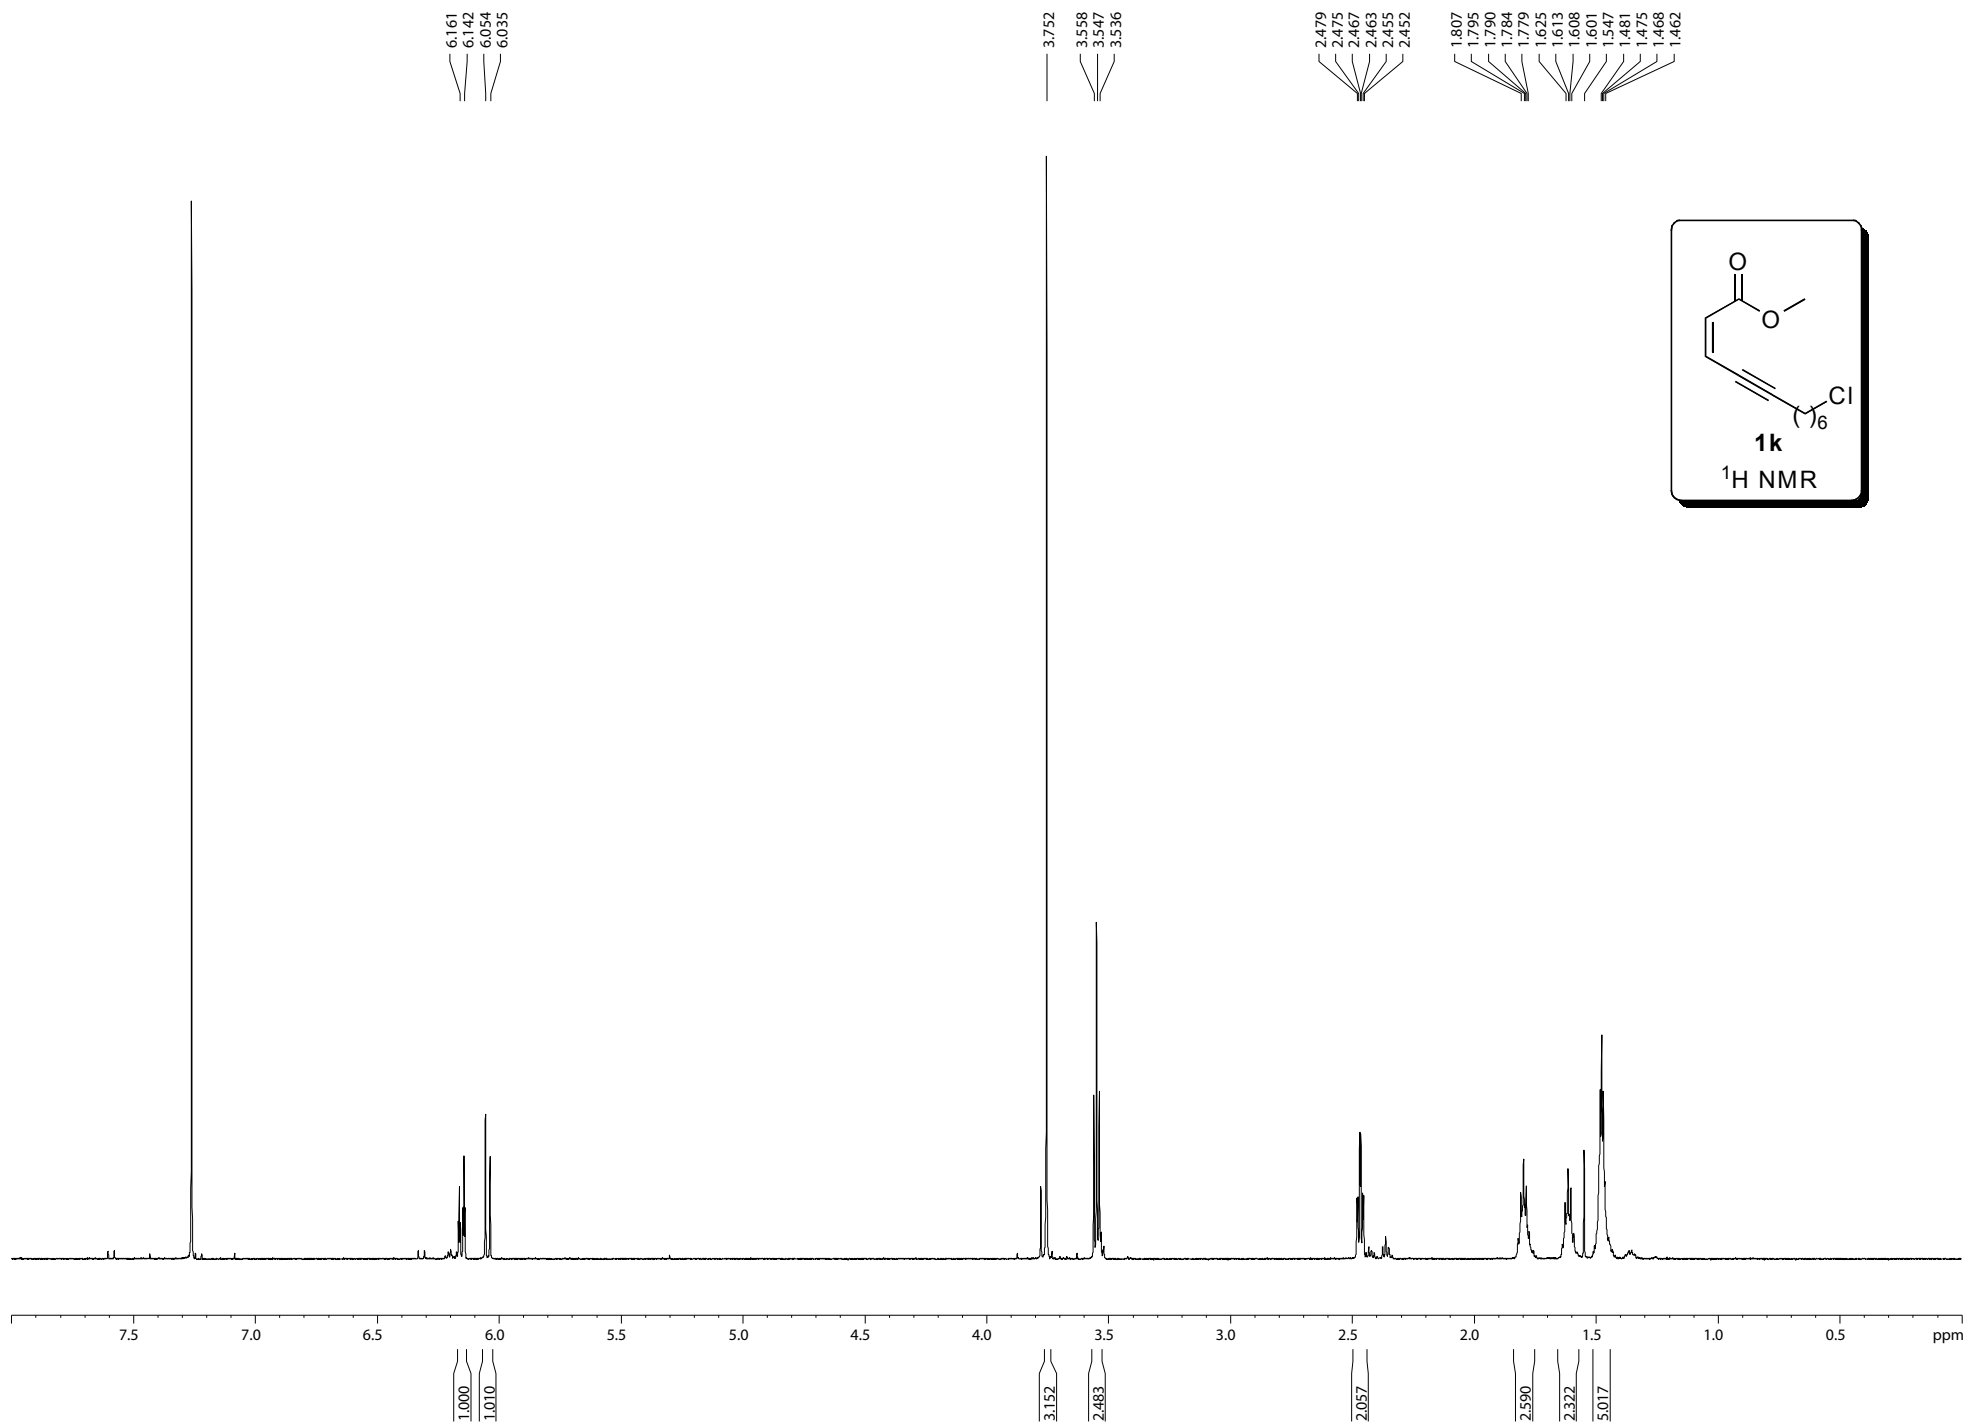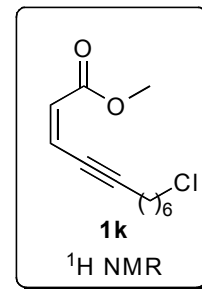

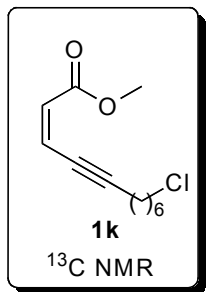

165.362

127.089

124.280

104.072

77.913

51.440

45.084

32.509

28.212

28.102

26.441

20.045

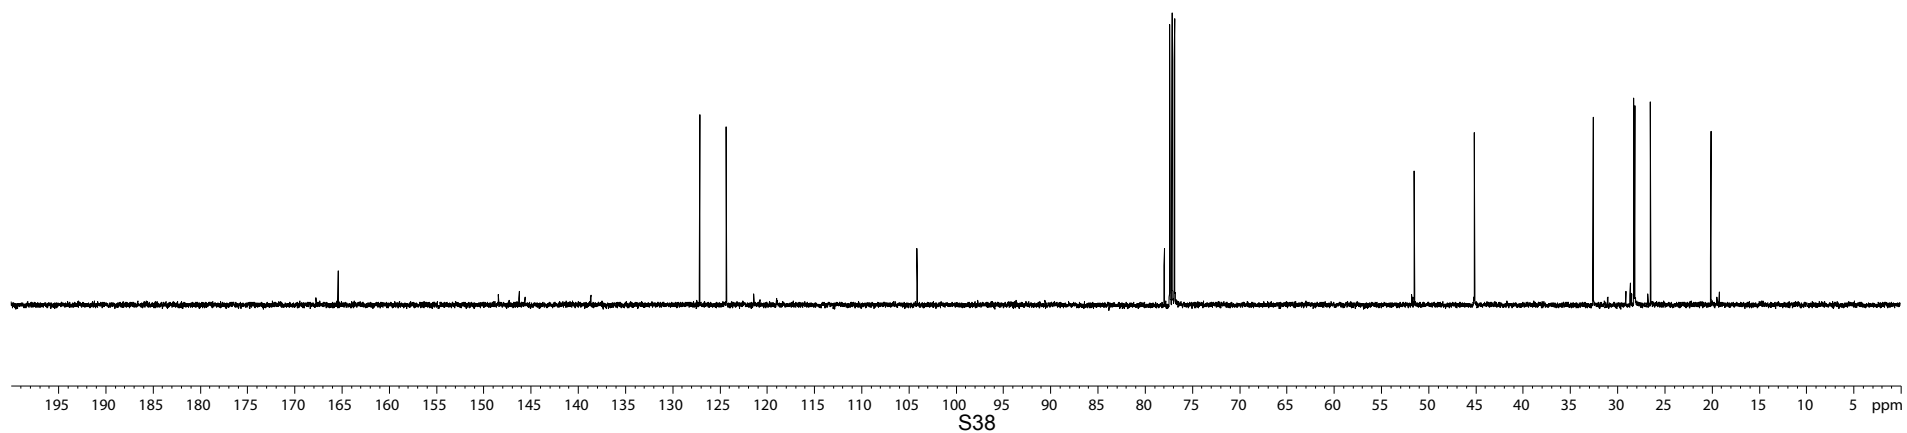

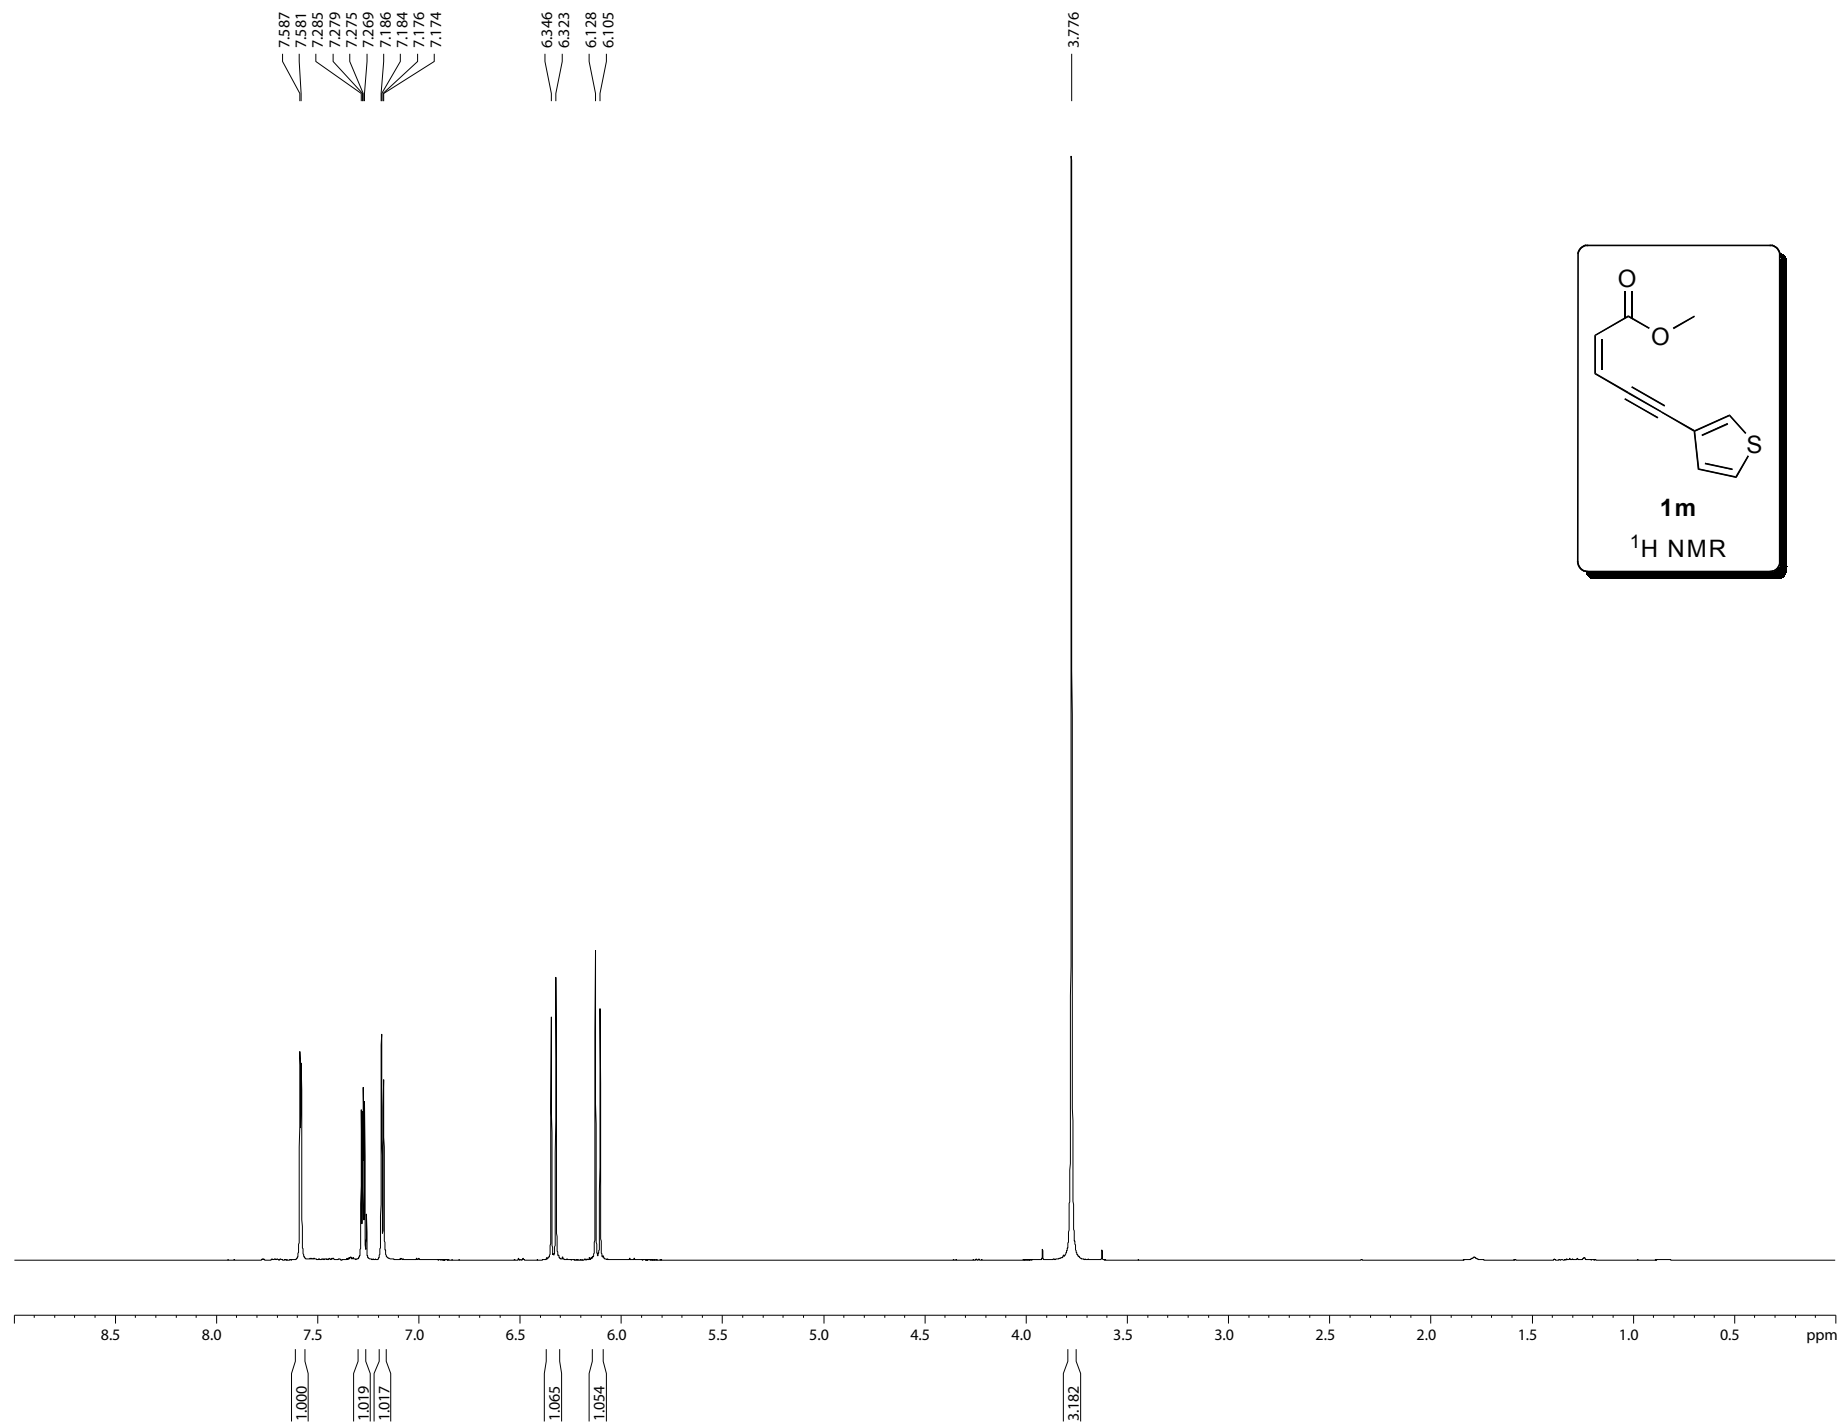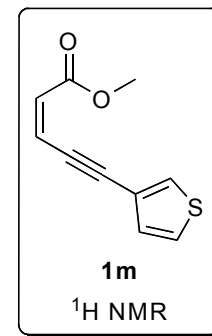

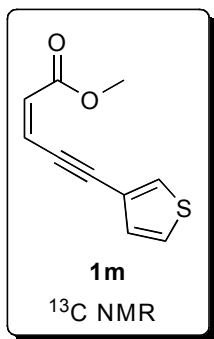

165.295

130.662  
129.986  
127.442  
125.666  
123.307  
121.823

96.768

86.246

51.563

195 190 185 180 175 170 165 160 155 150 145 140 135 130 125 120 115 110 105 100 95 90 85 80 75 70 65 60 55 50 45 40 35 30 25 20 15 10 5 ppm



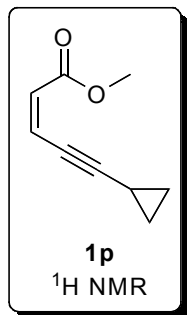

7.259

6.117  
6.113  
6.098  
6.094  
6.014  
5.995

3.738

1.503  
1.498  
1.494  
1.489  
1.485  
1.481  
1.476  
1.471  
0.930  
0.926  
0.919  
0.917  
0.912  
0.864  
0.862  
0.860  
0.856  
0.852

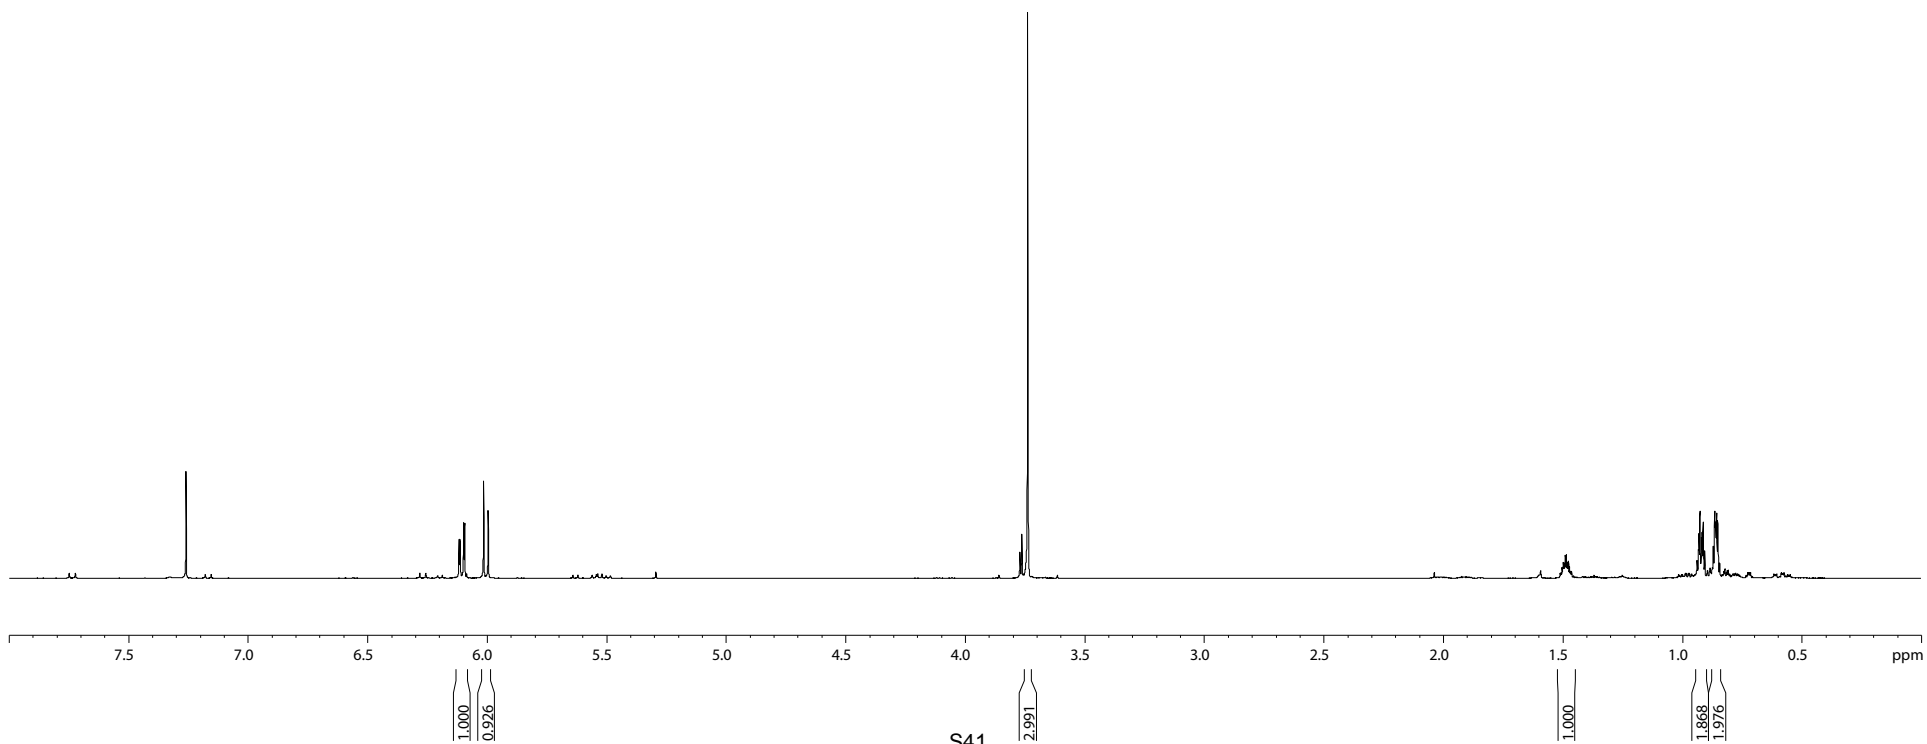

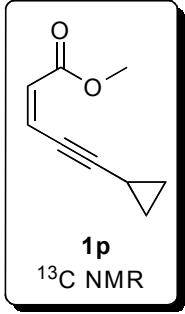

165.453

126.588

124.383

108.219

73.520

51.375

9.592

0.984

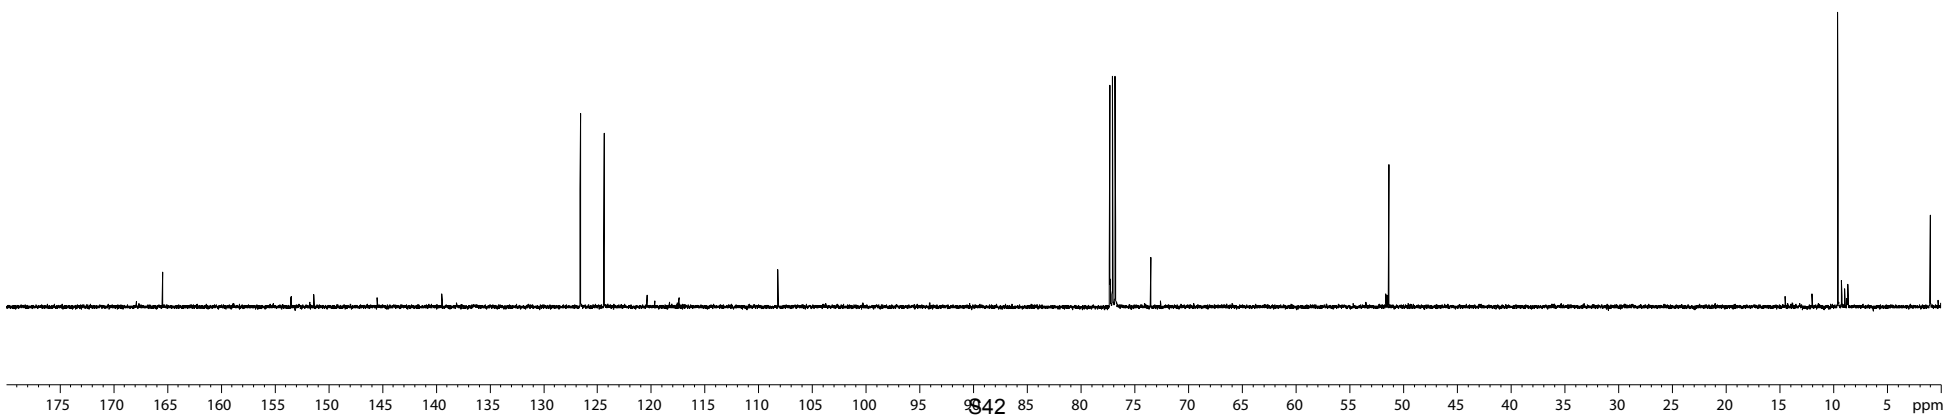

7.930  
7.929  
7.917  
7.916  
7.911  
7.910  
7.909  
7.908  
7.905  
7.905  
7.286  
7.283  
7.274  
7.272  
7.271  
7.270  
7.260  
7.258  
7.115  
7.113  
7.108  
7.103  
7.099  
7.094  
7.091  
7.089  
7.087  
7.081  
7.077  
7.075  
7.068  
7.065  
7.062  
7.056  
7.054  
7.051  
7.015  
7.013  
7.005  
7.002  
7.001  
7.000  
6.989  
6.987  
6.968  
6.967  
6.965

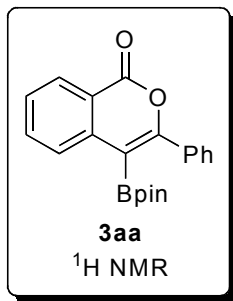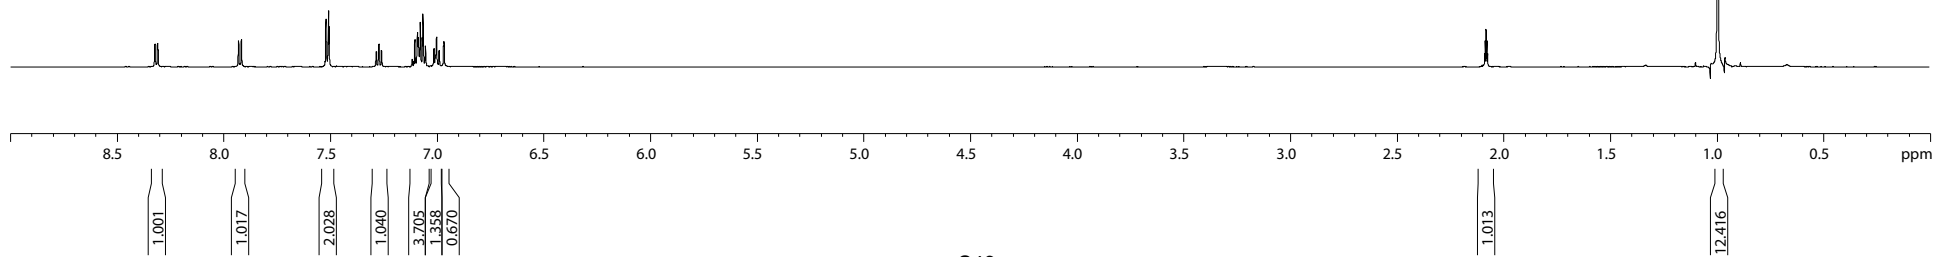

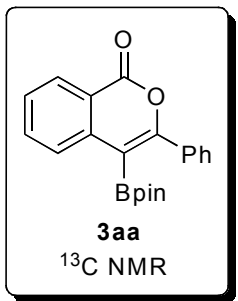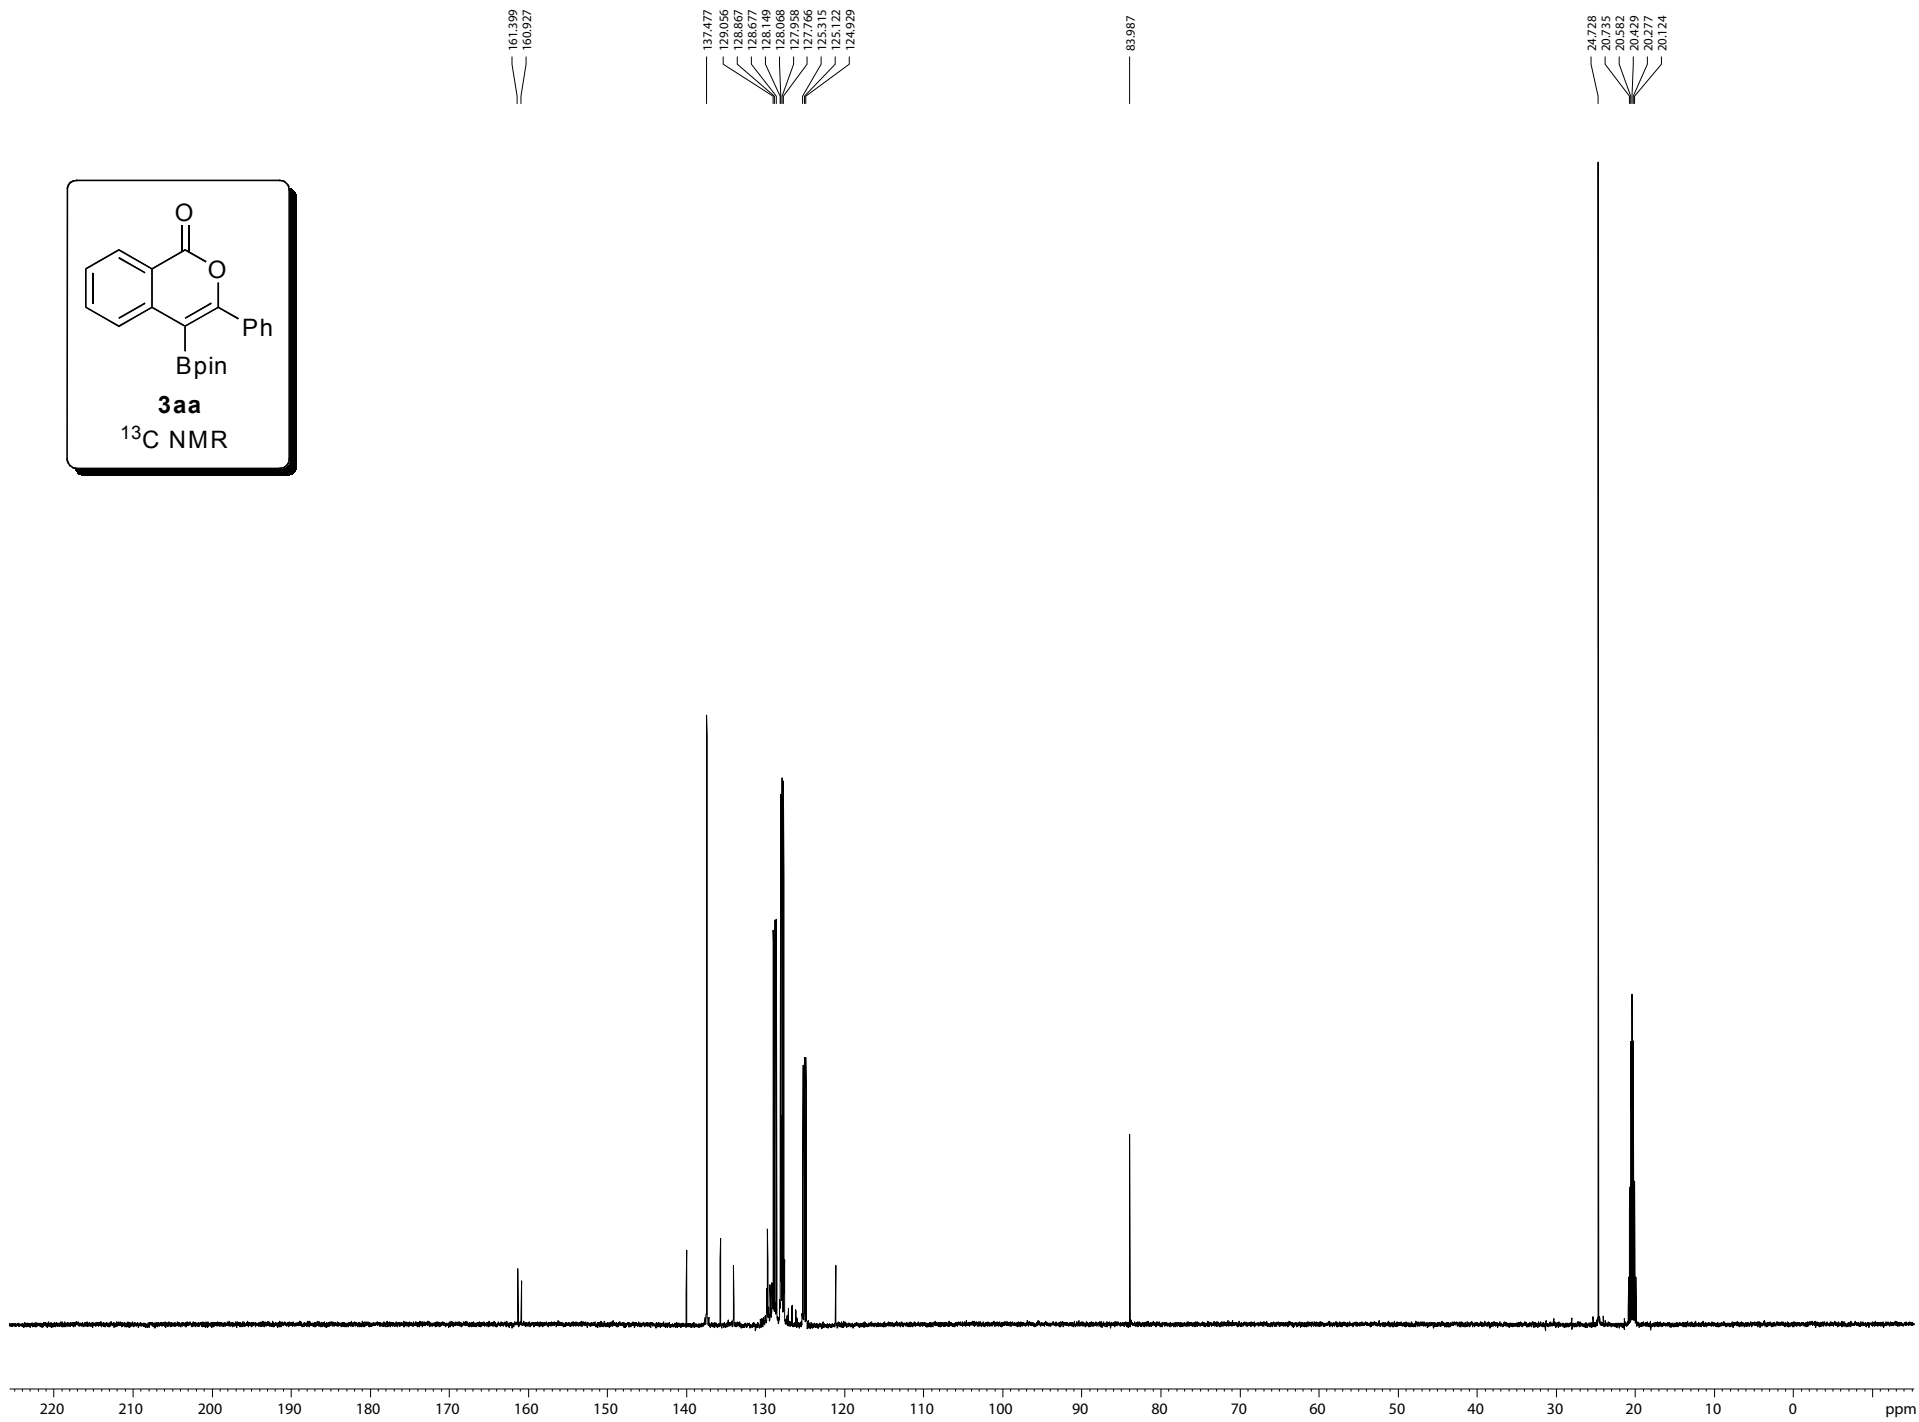

31.454

—

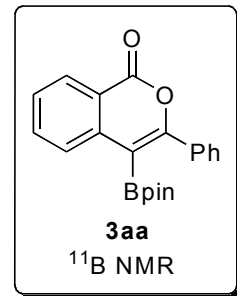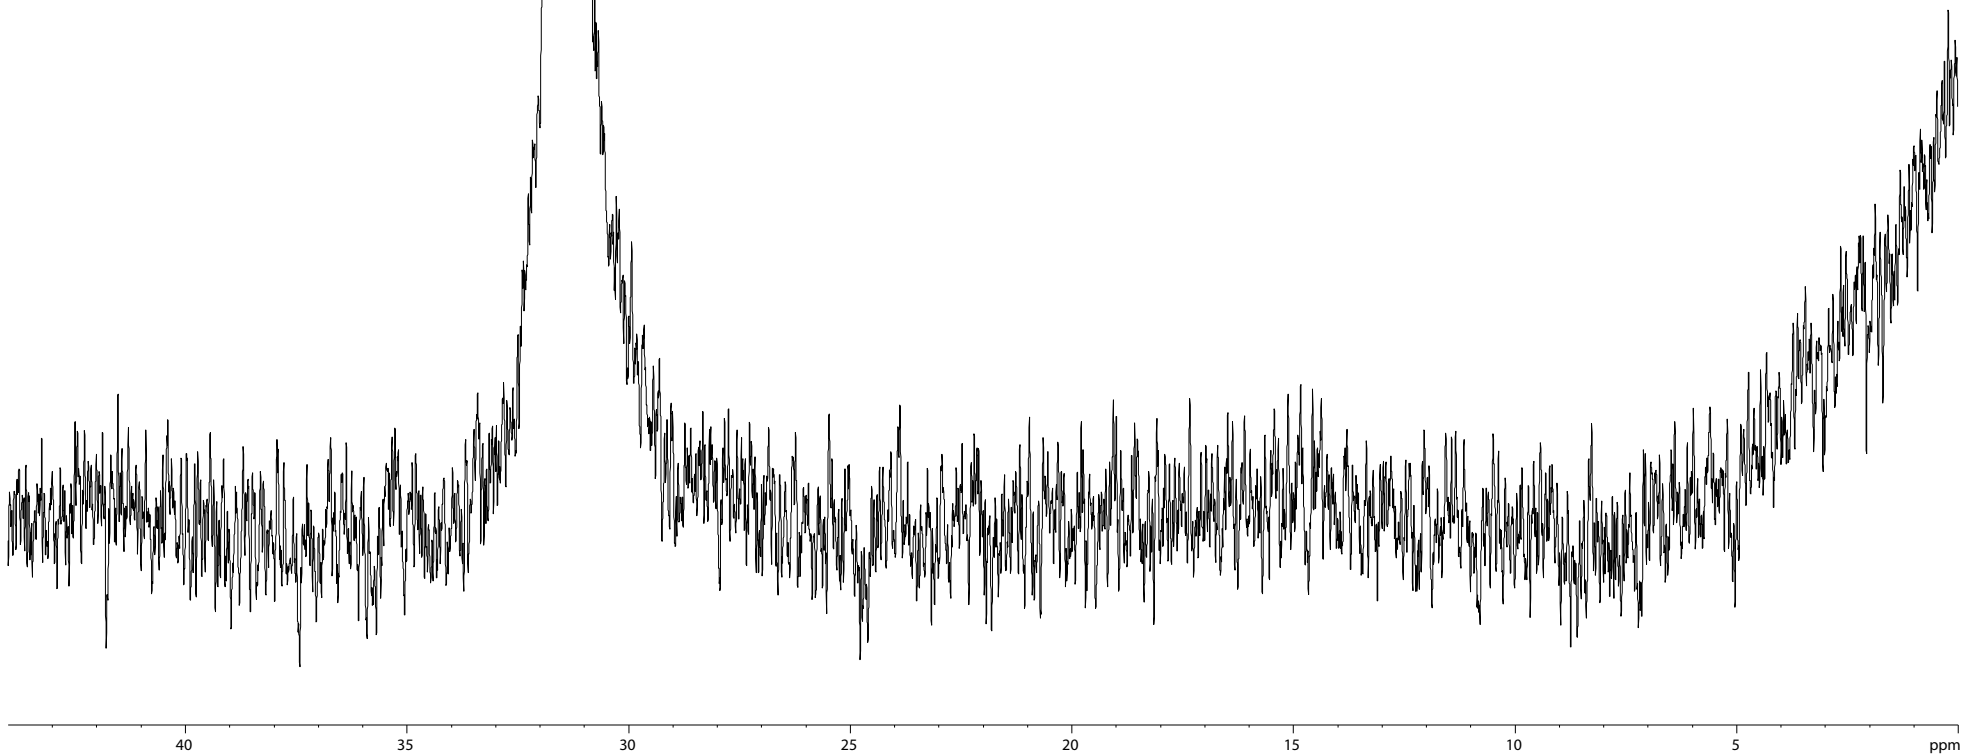

8.282  
8.280  
8.268  
8.267  
7.826  
7.823  
7.813  
7.812  
7.811  
7.810  
7.800  
7.798  
7.764  
7.759  
7.756  
7.751  
7.747  
7.657  
7.644  
7.586  
7.585  
7.573  
7.561  
7.559  
7.512  
7.508  
7.503  
7.500  
6.509

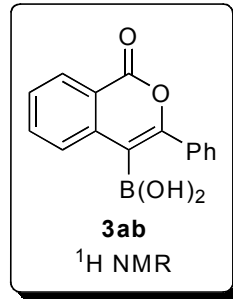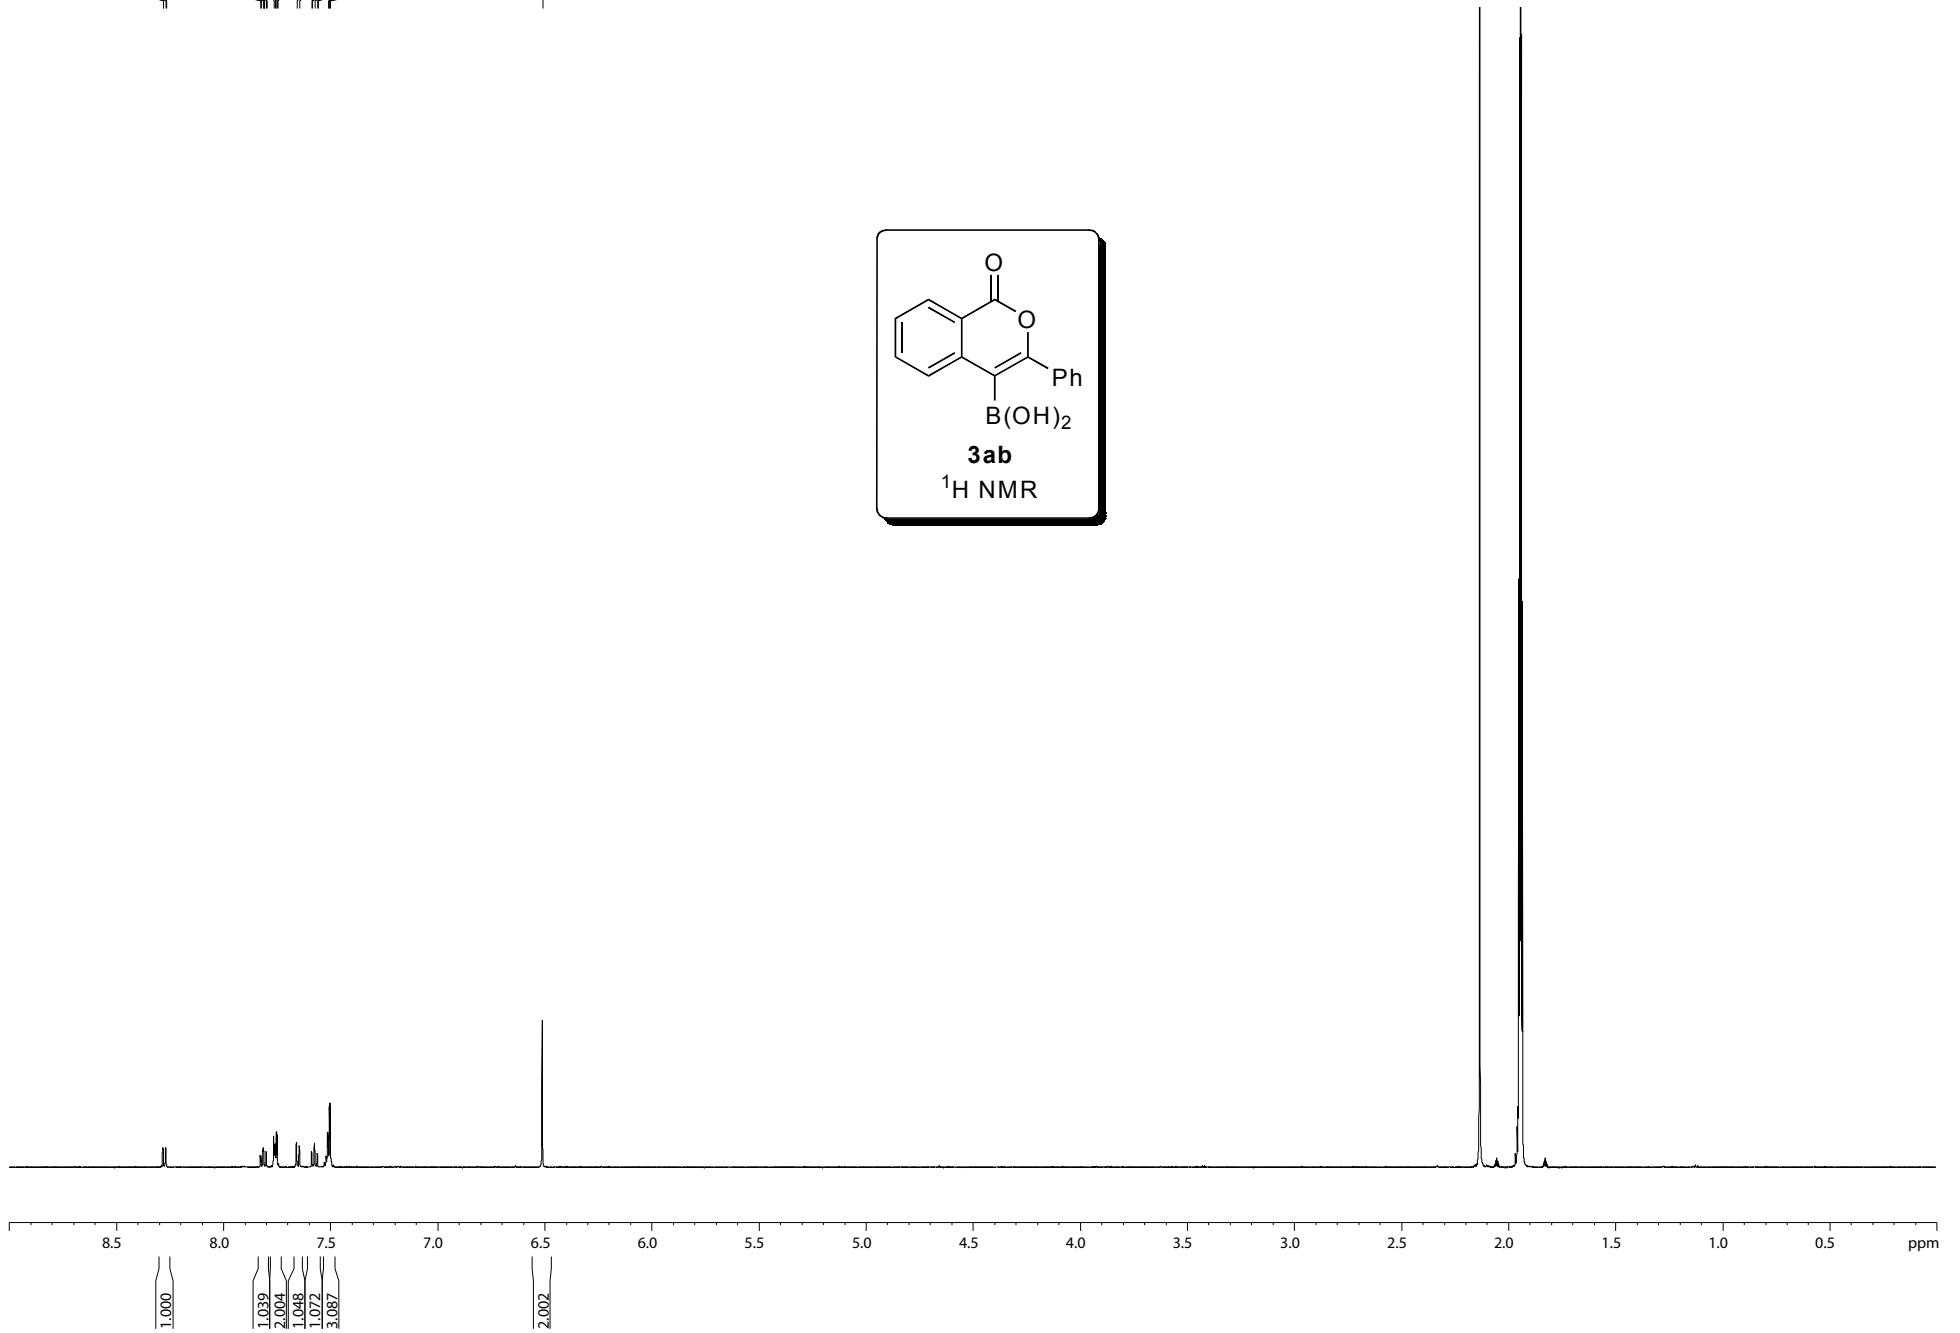

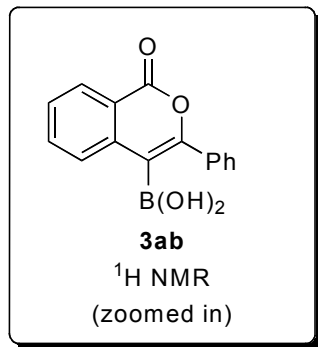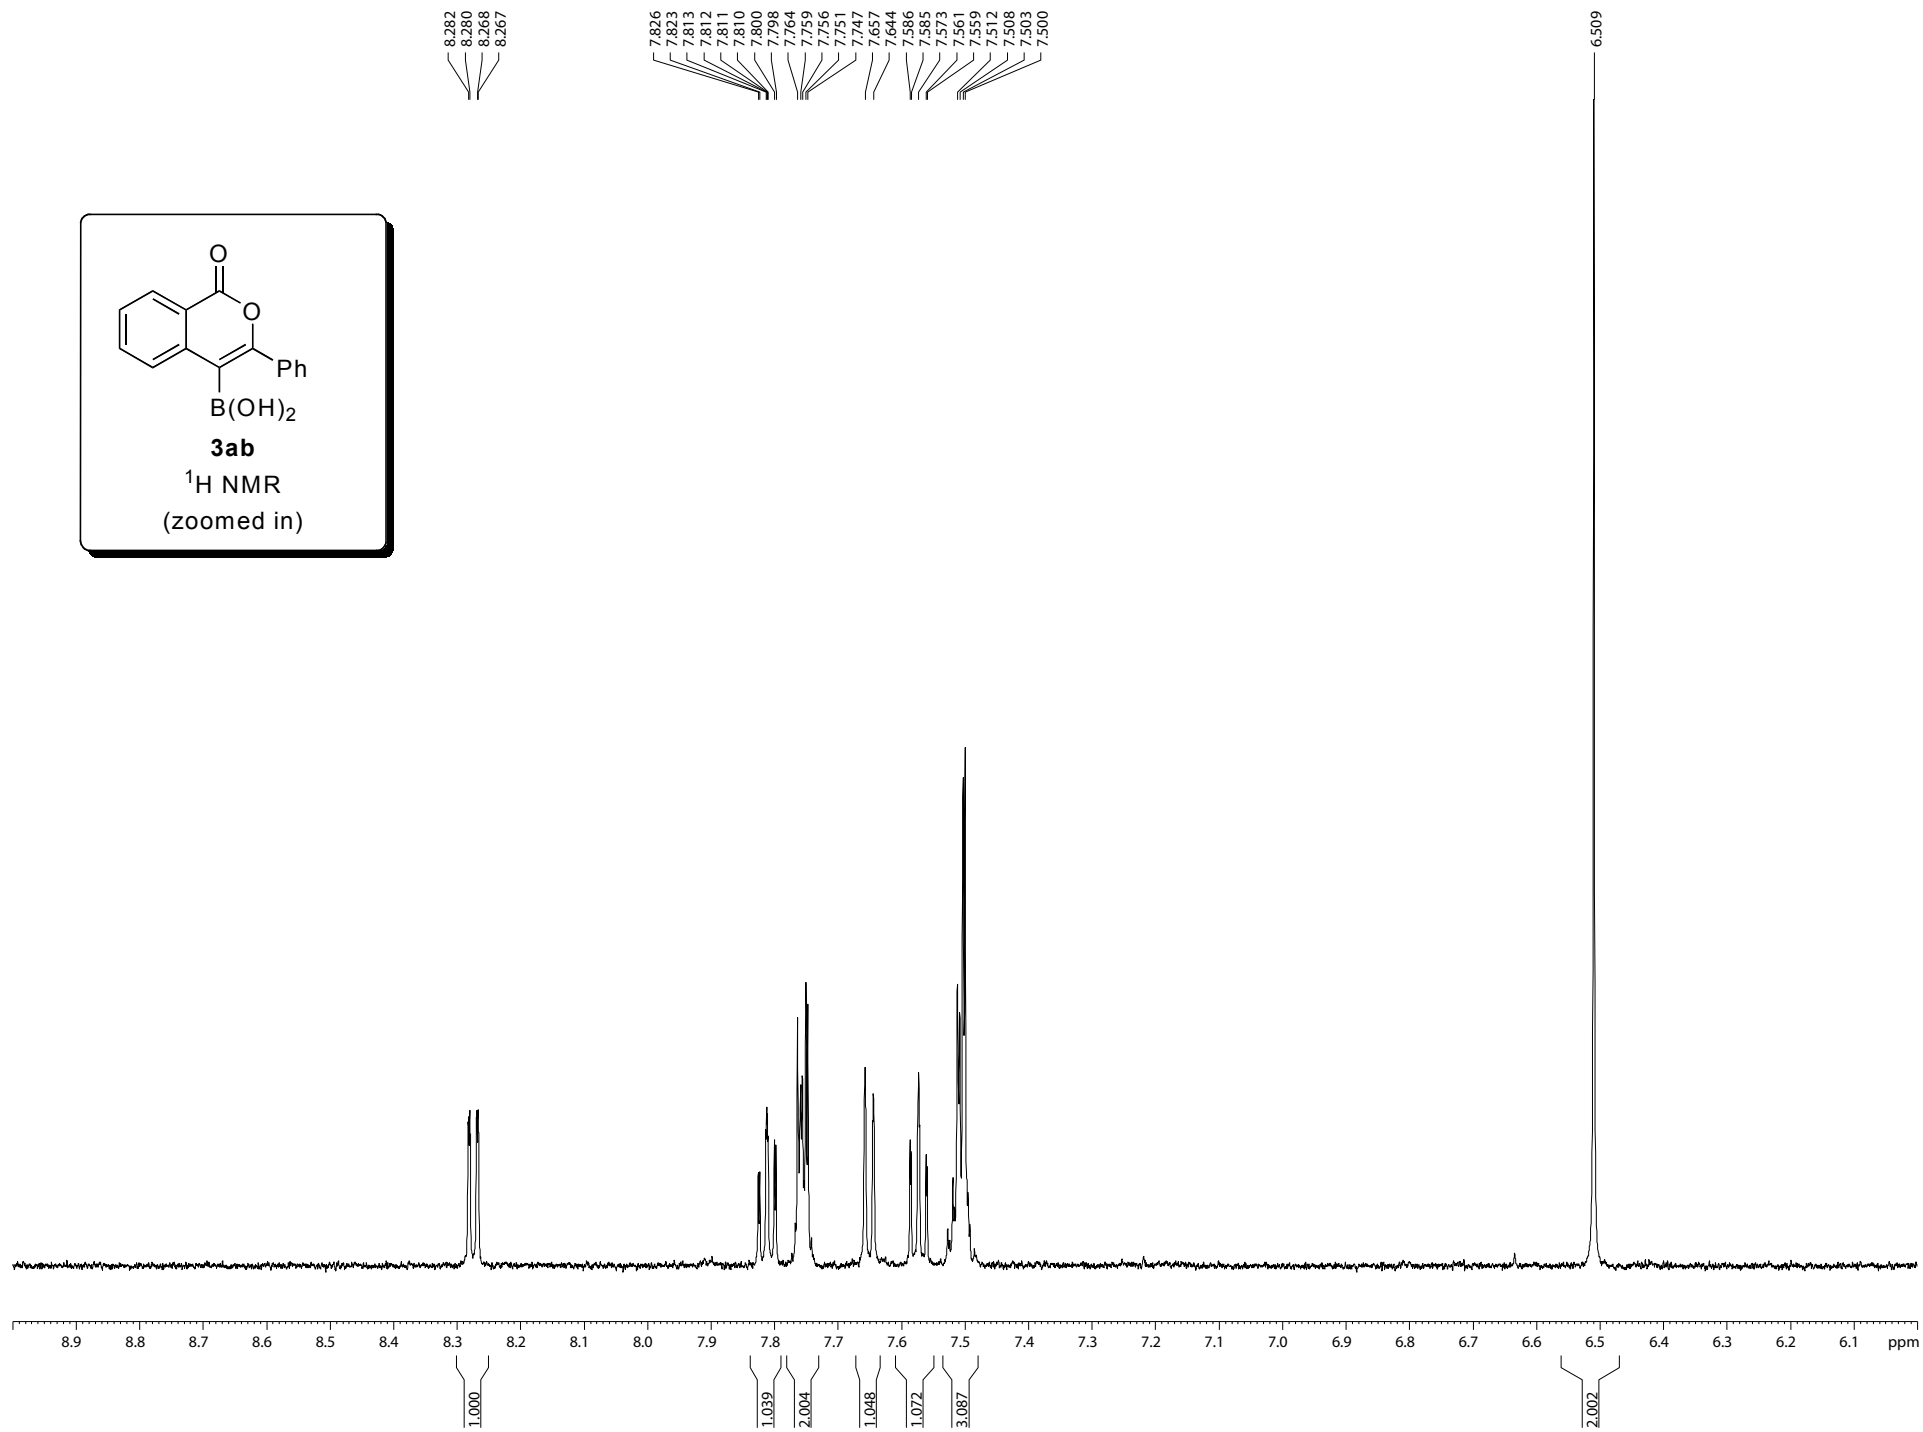

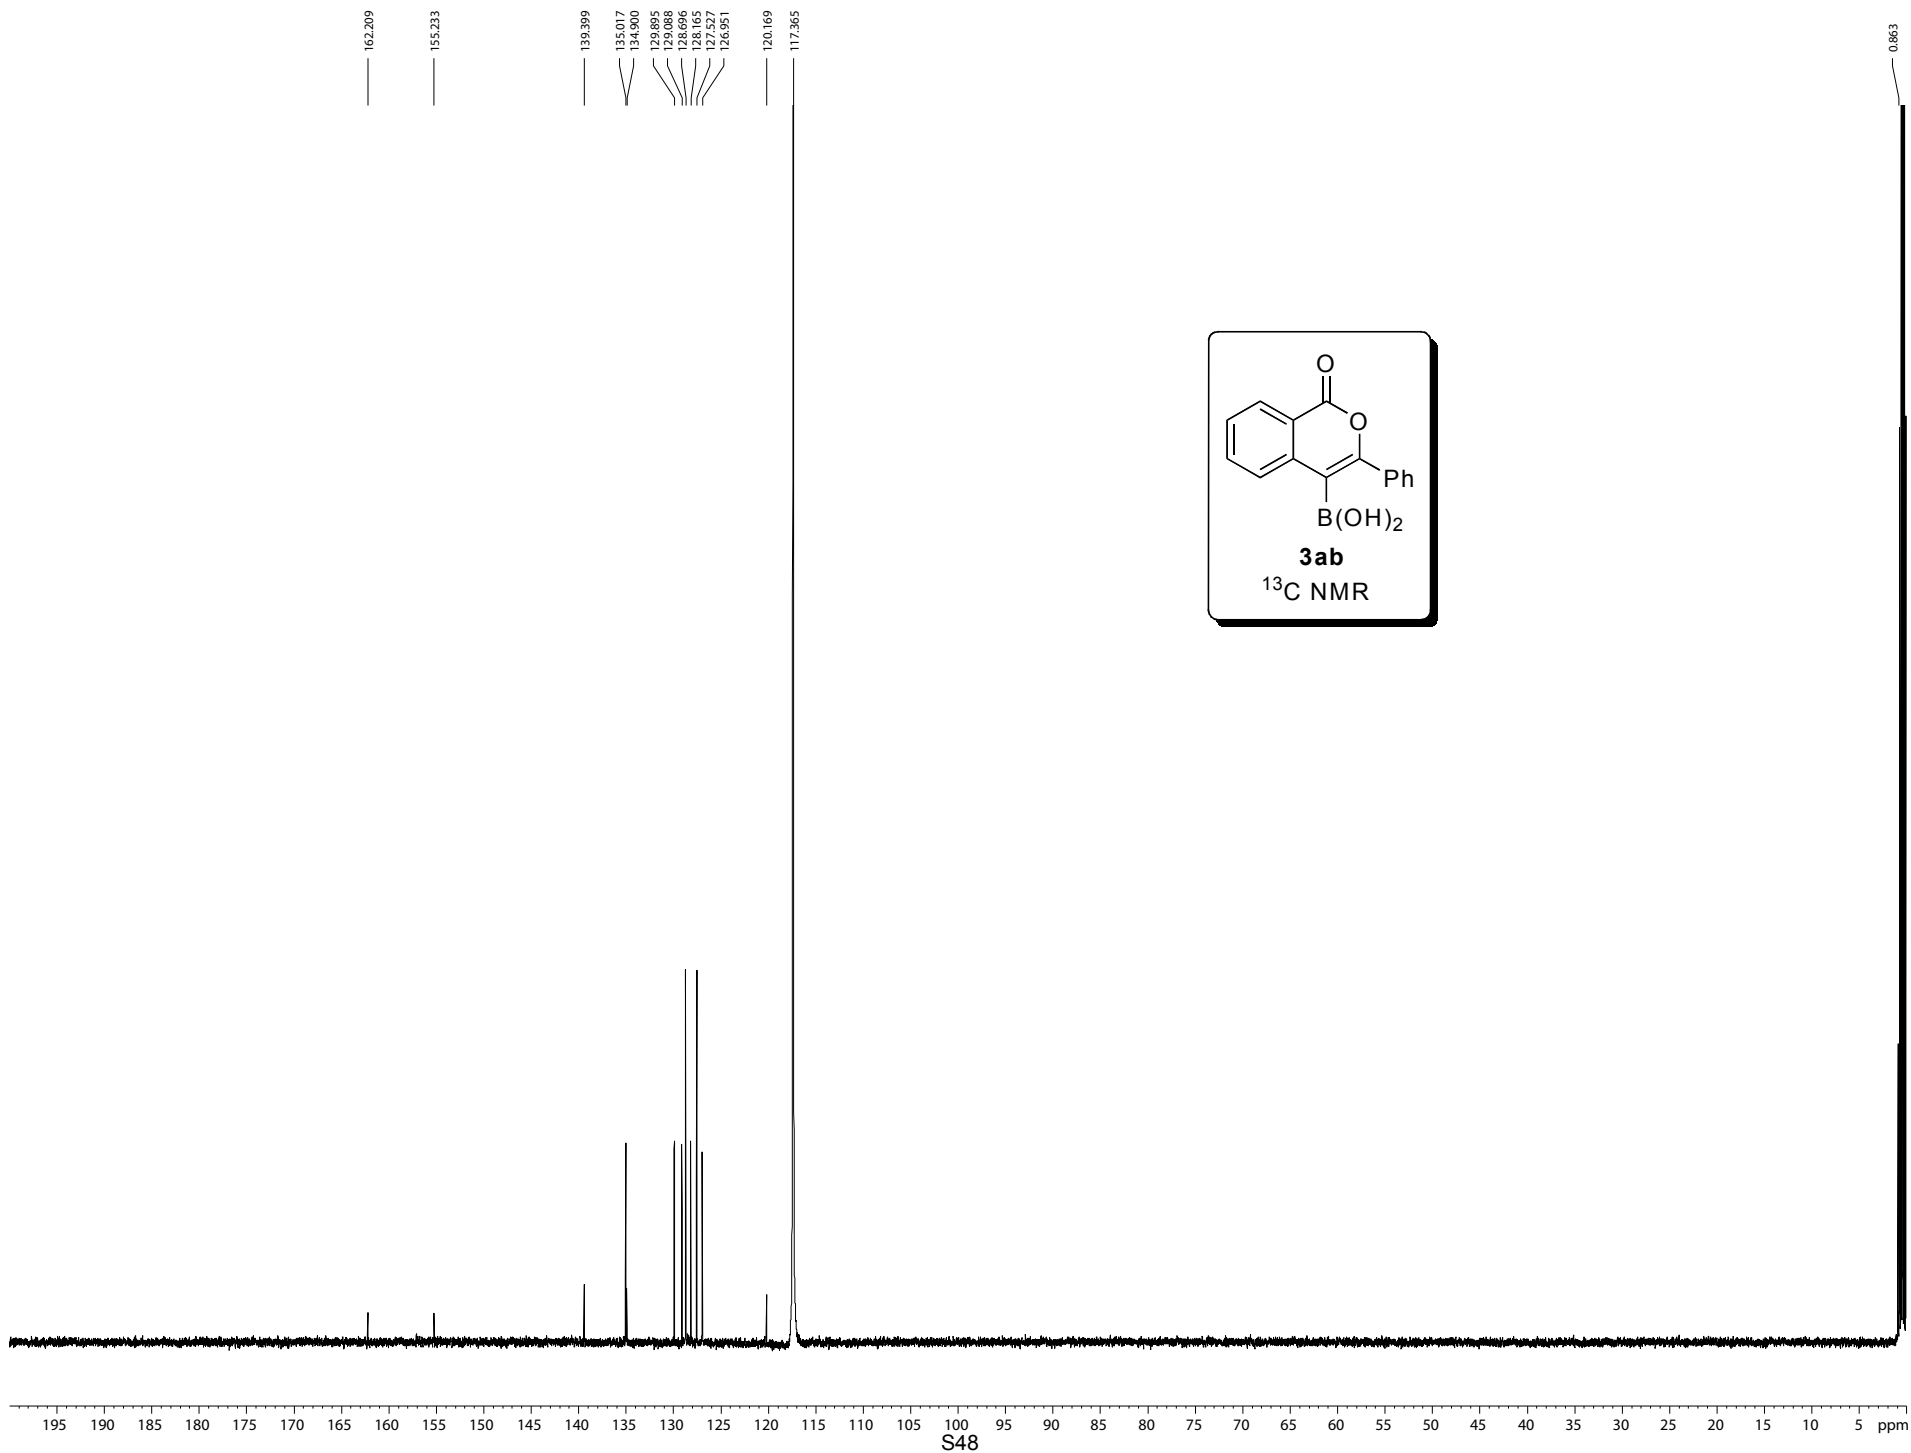



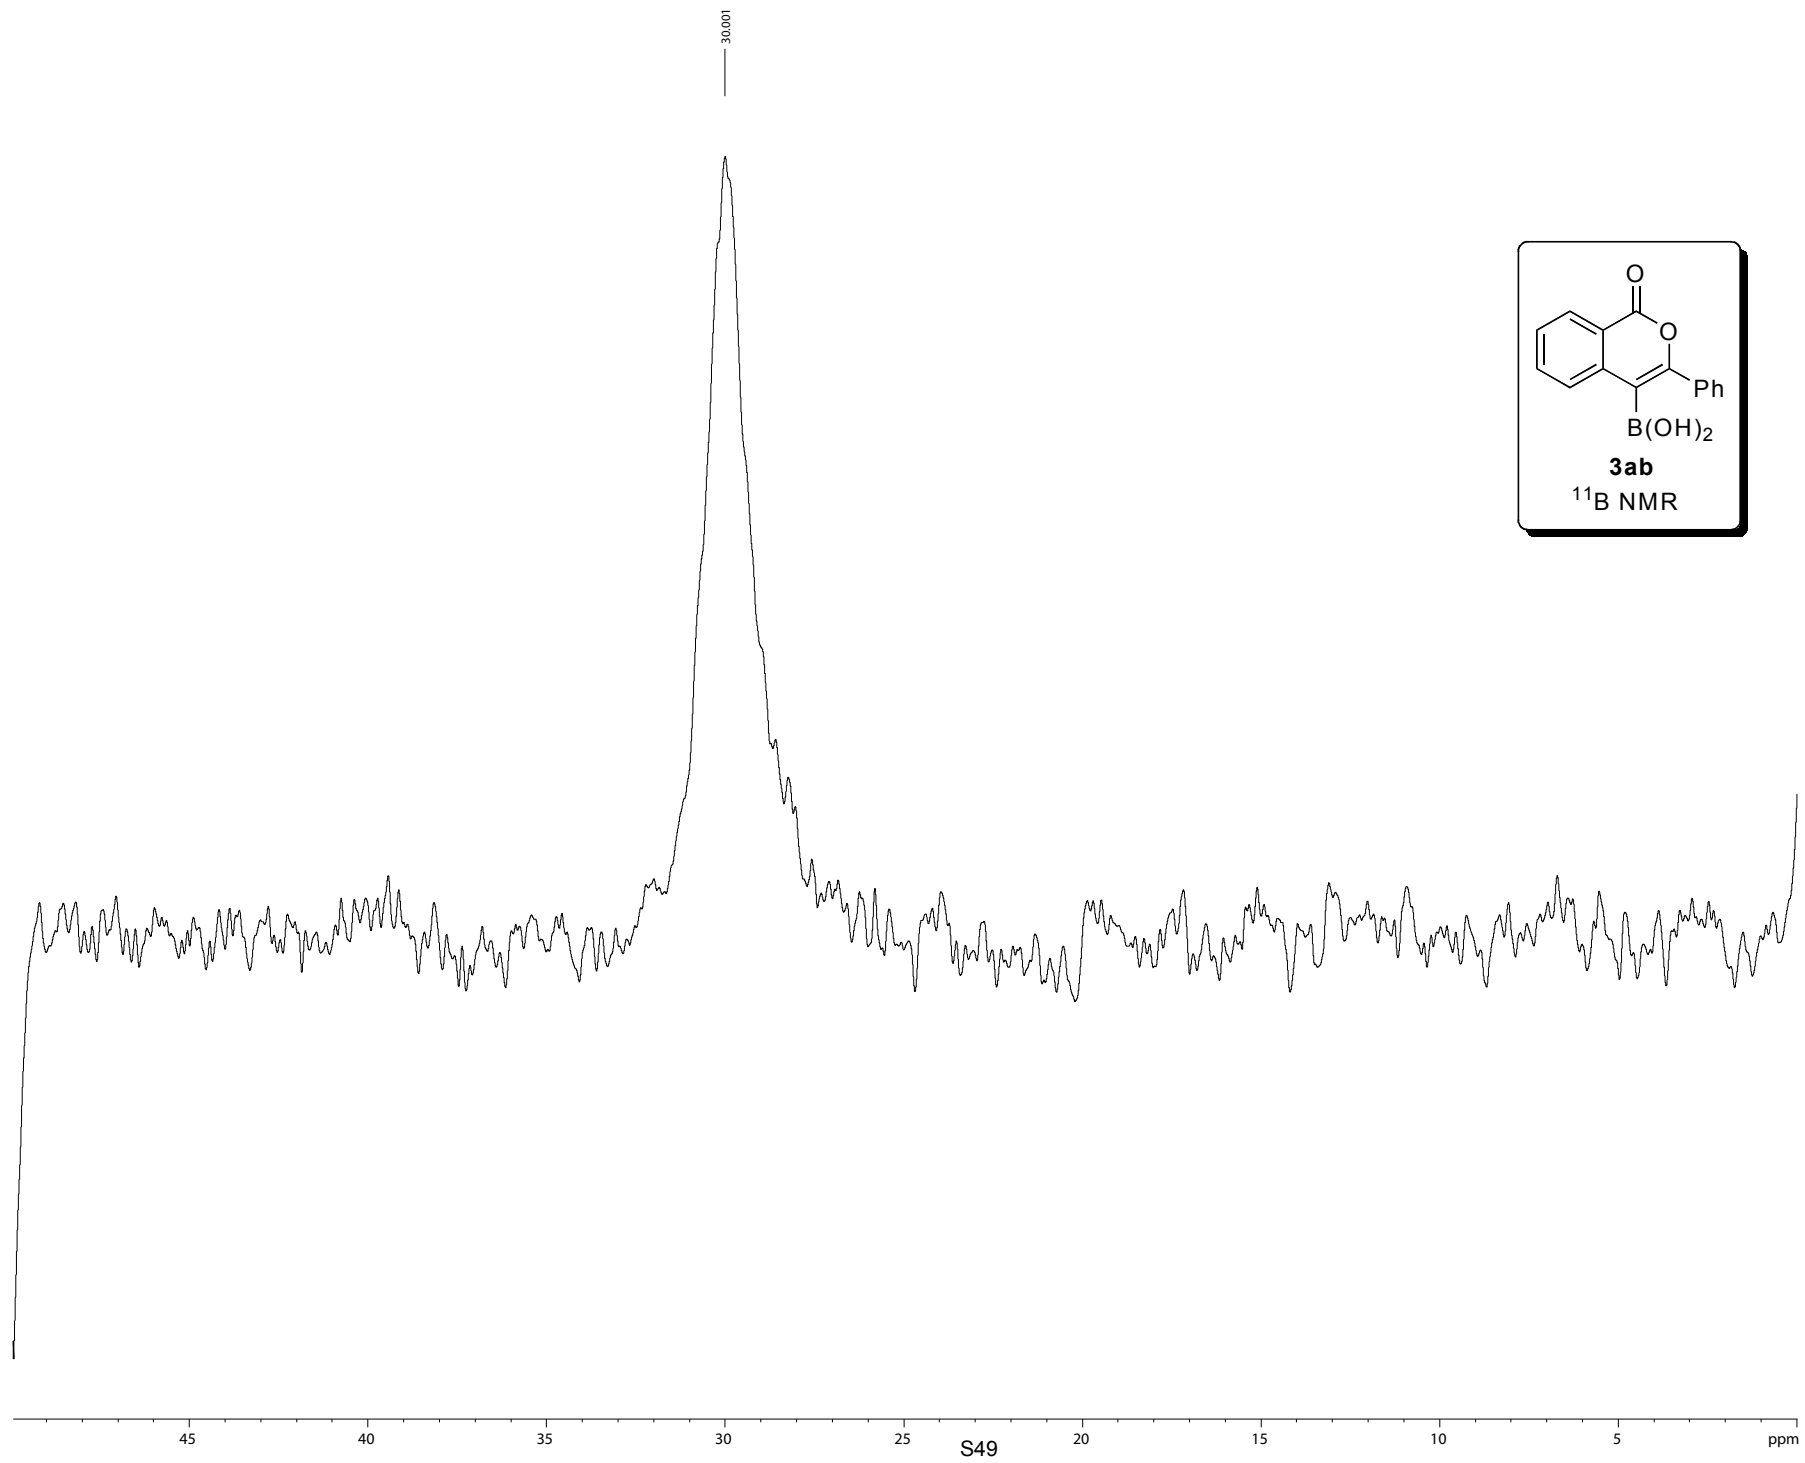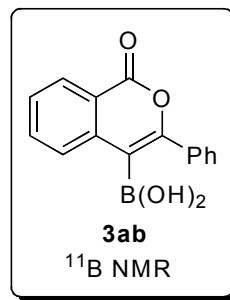

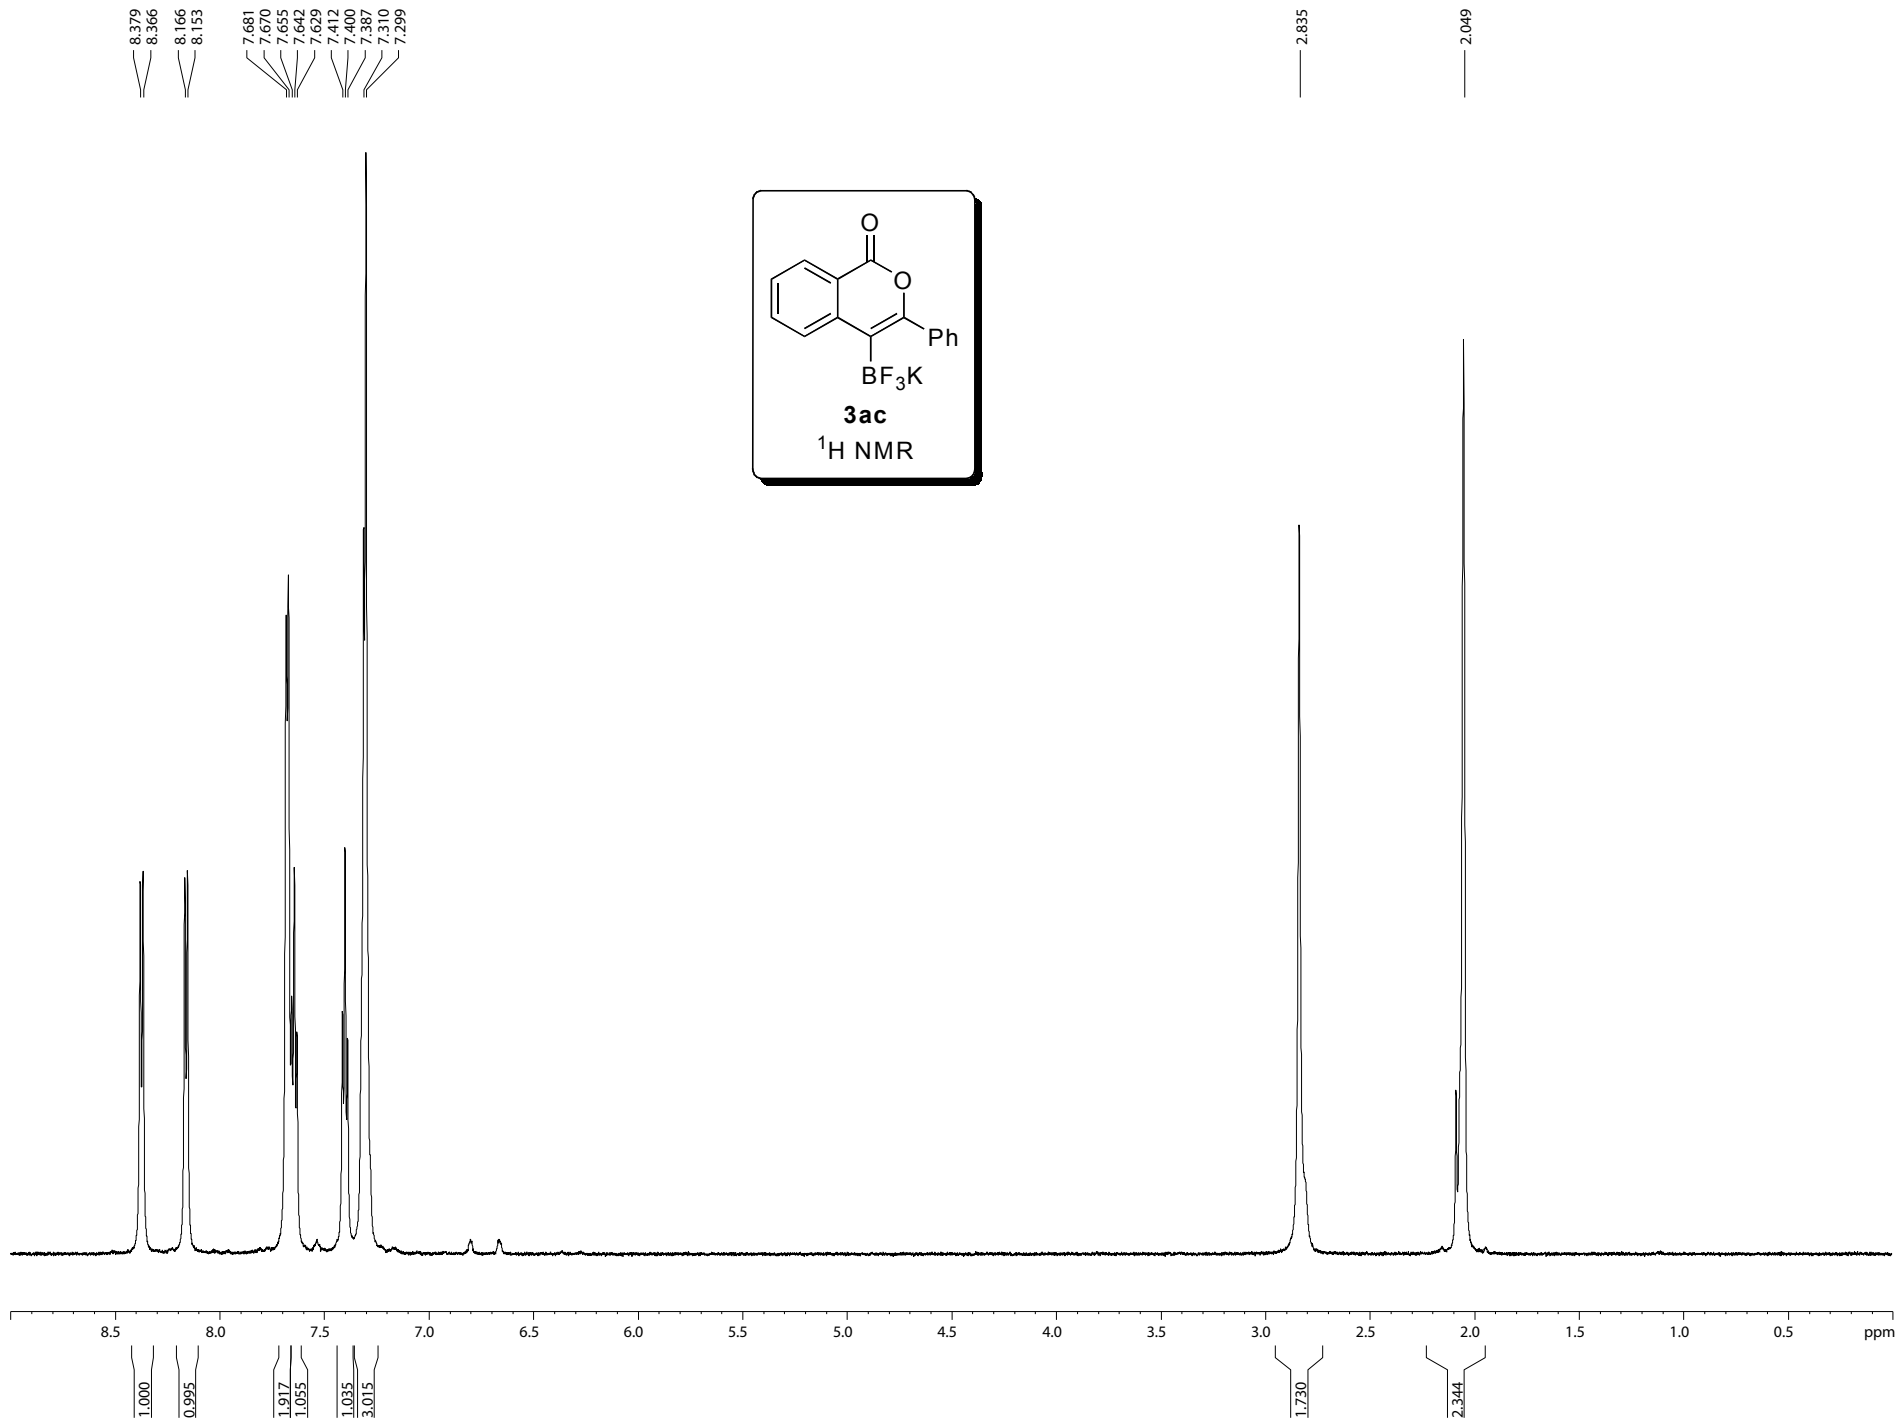

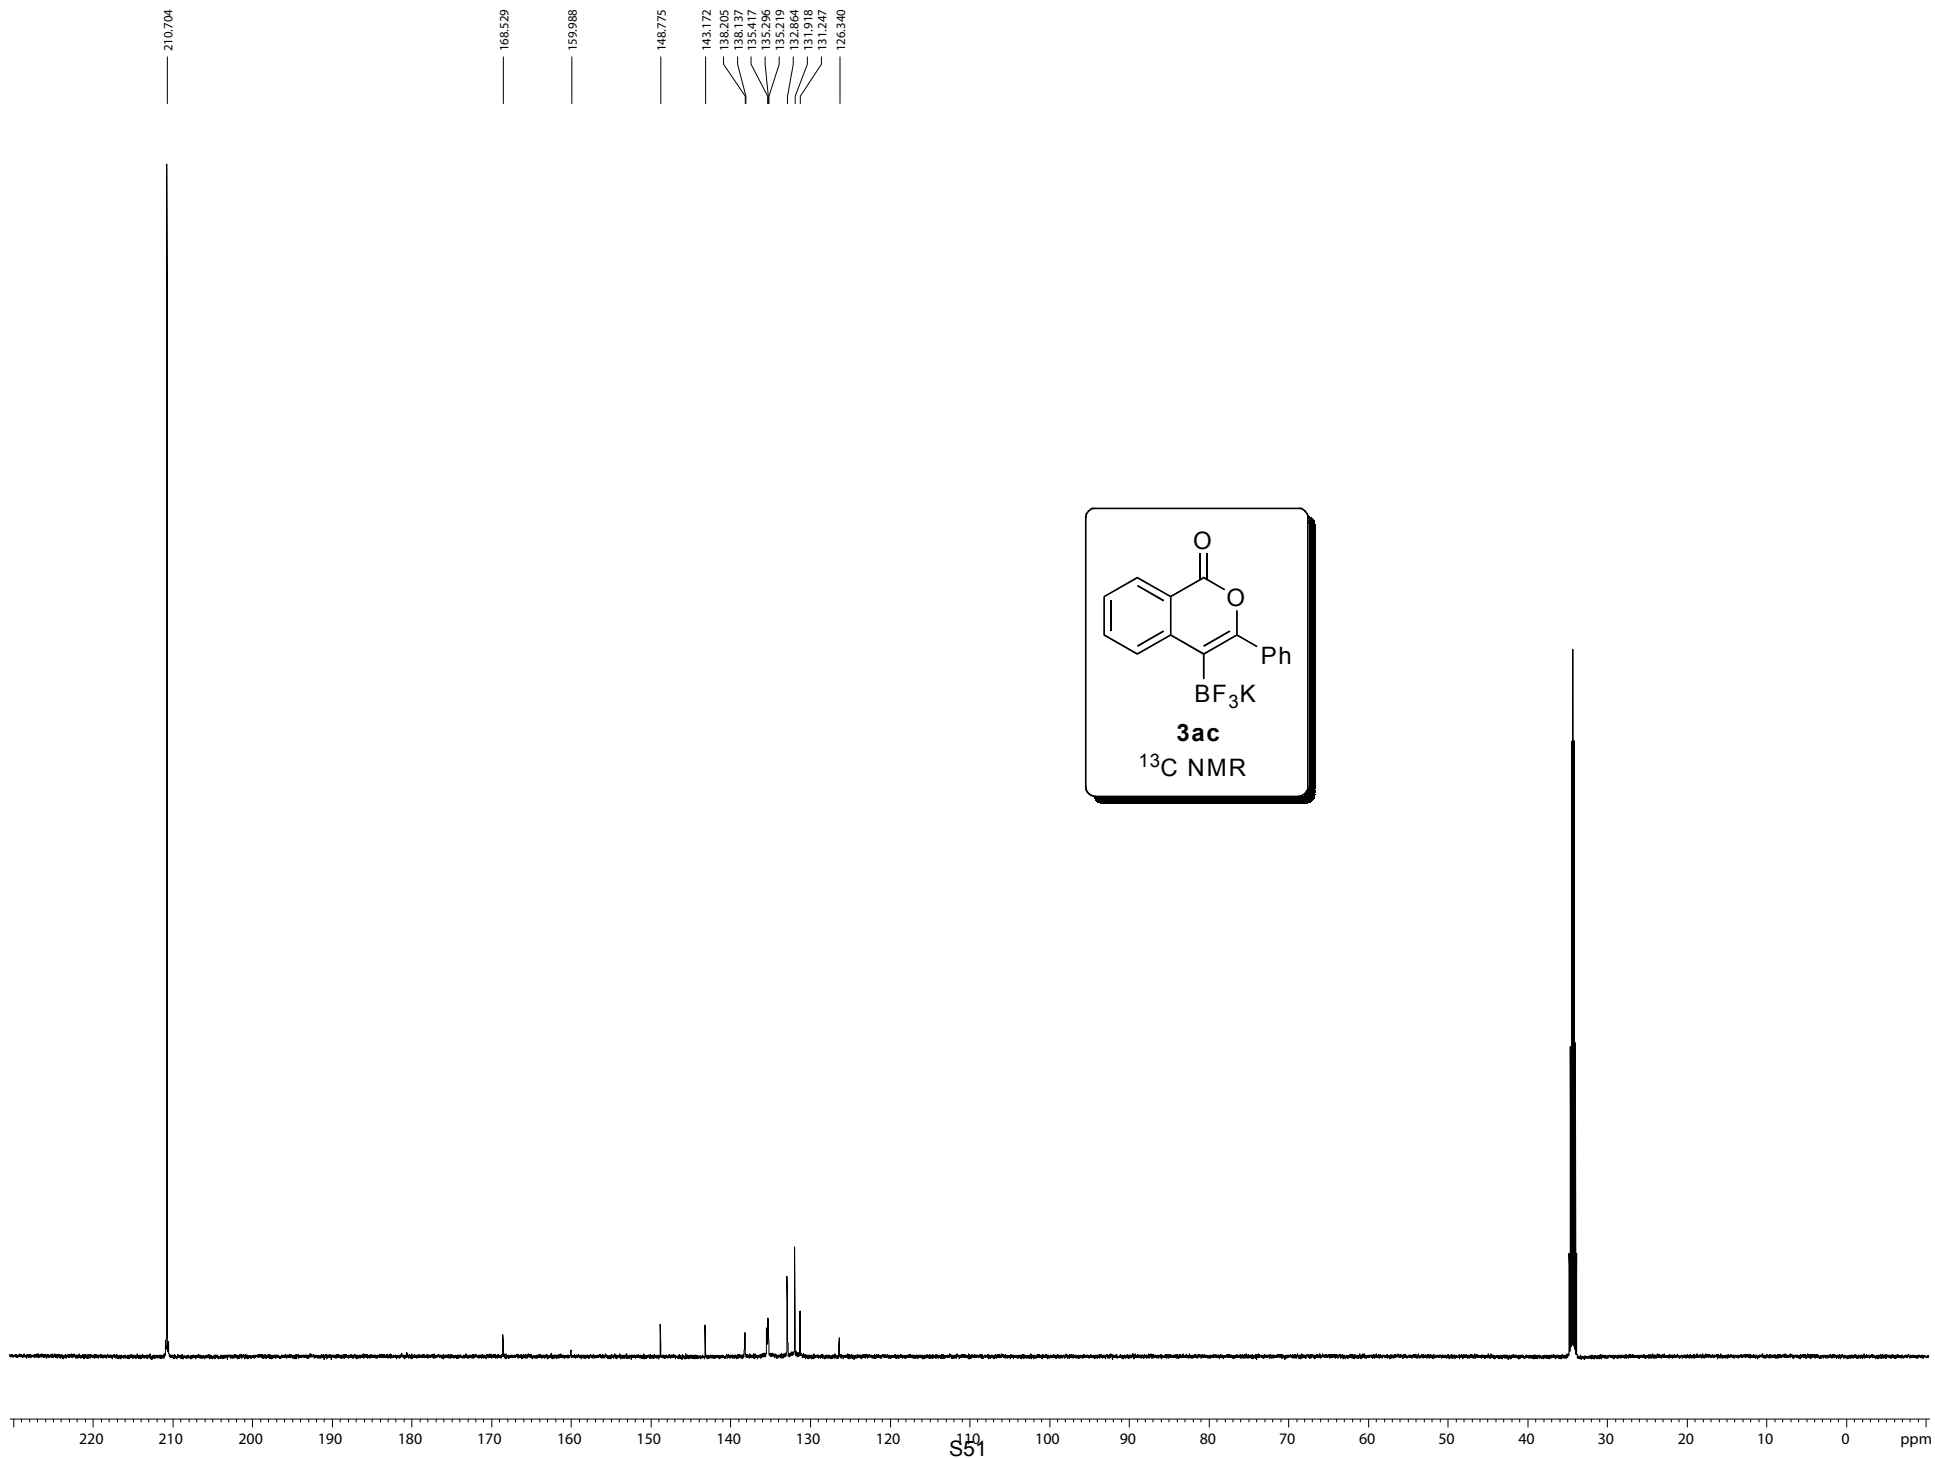

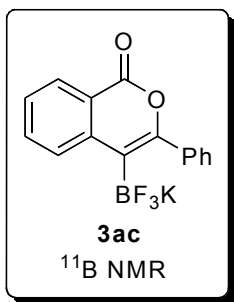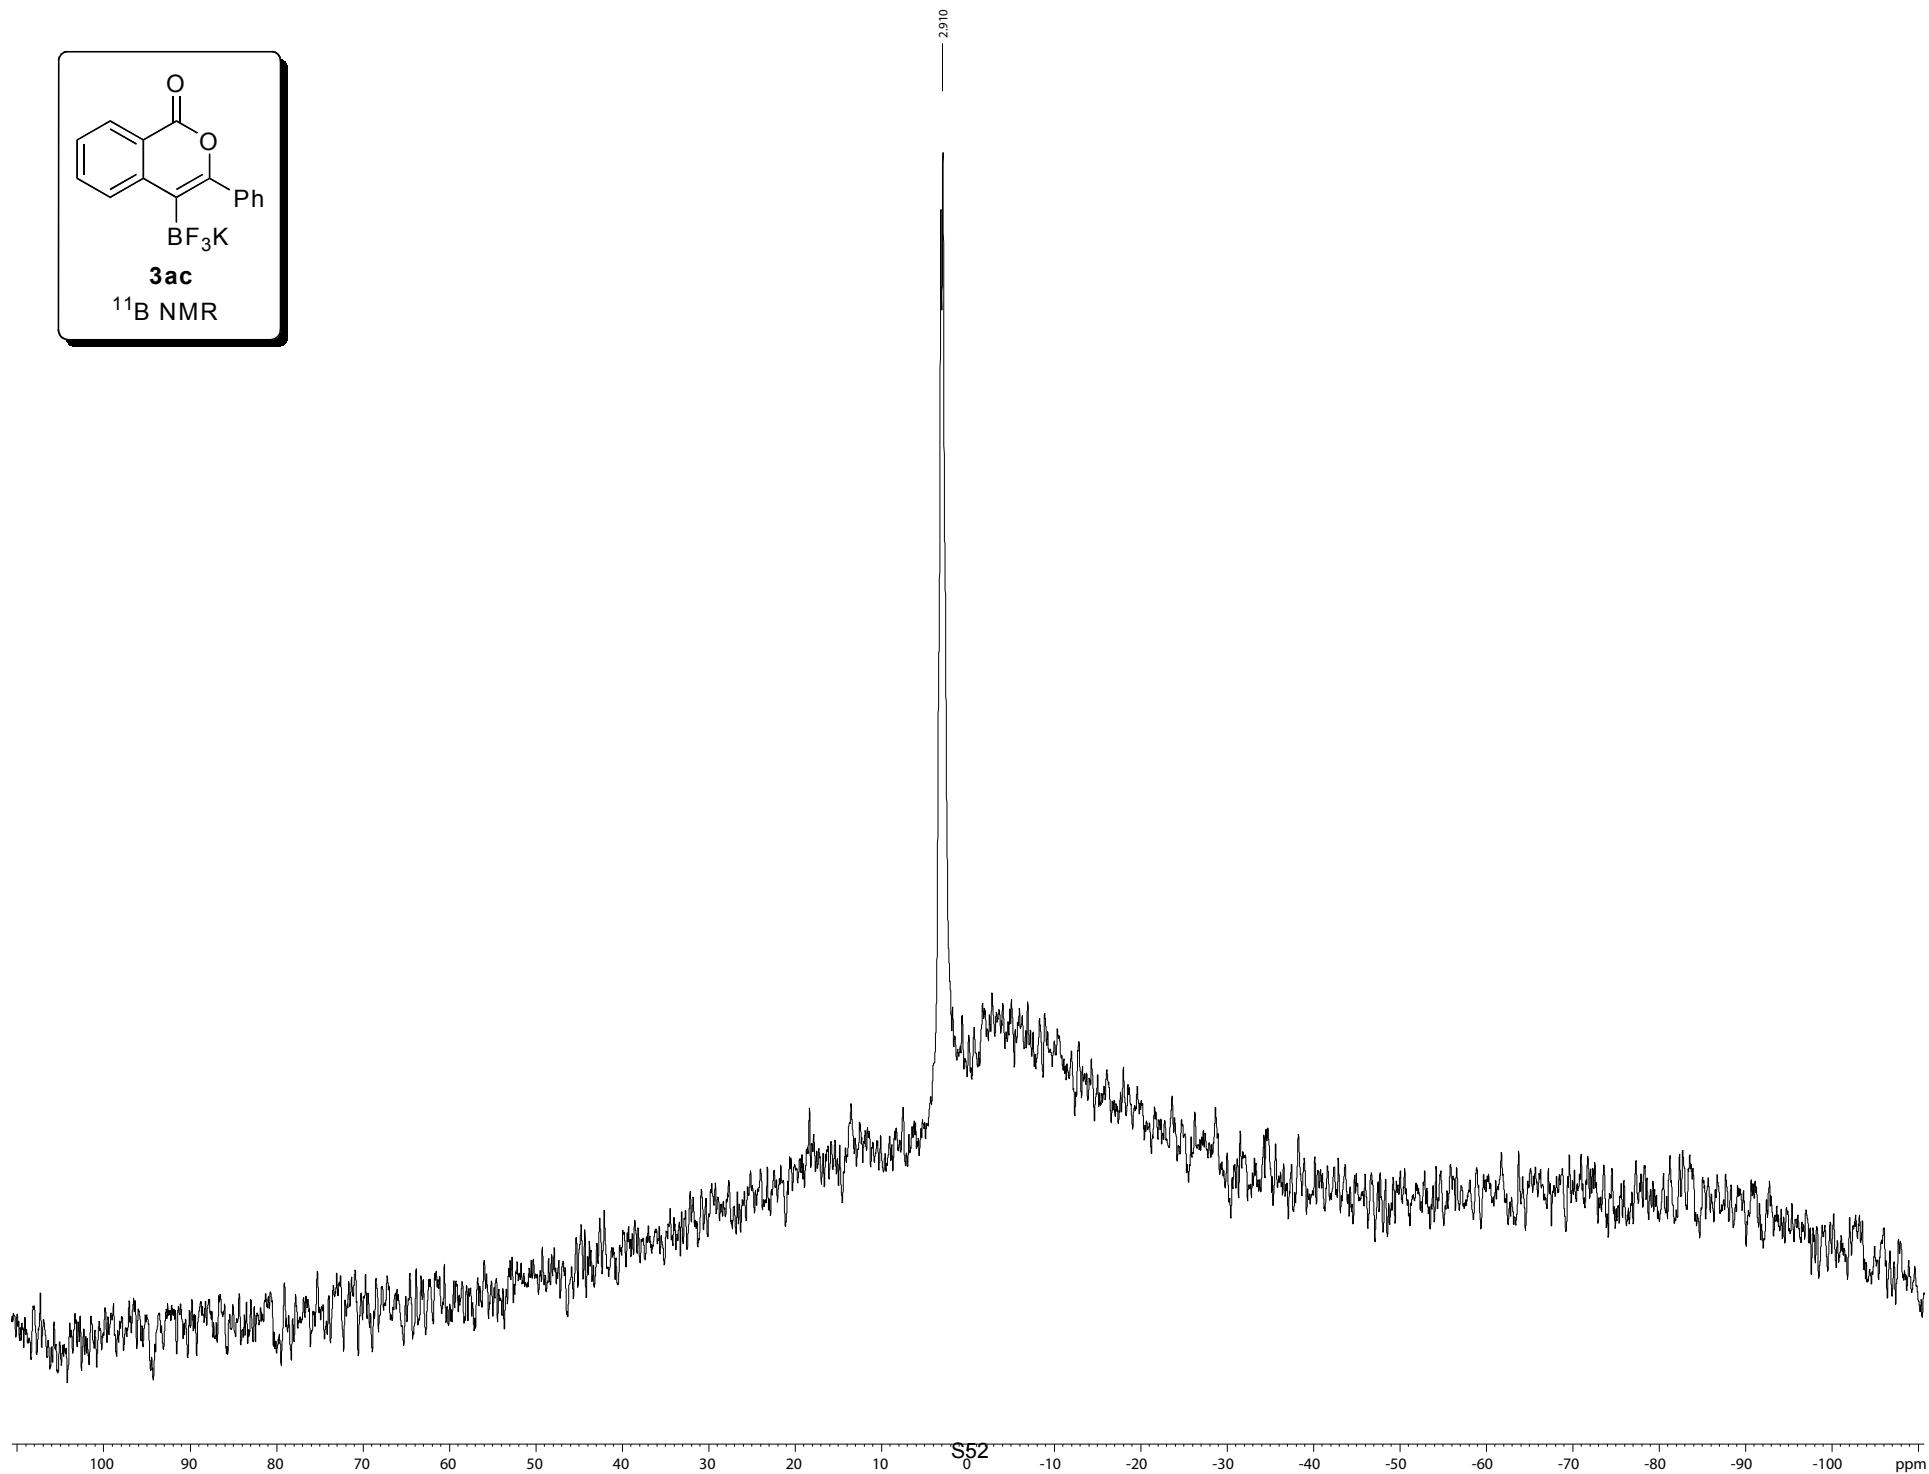

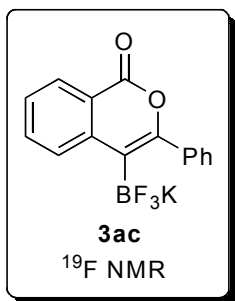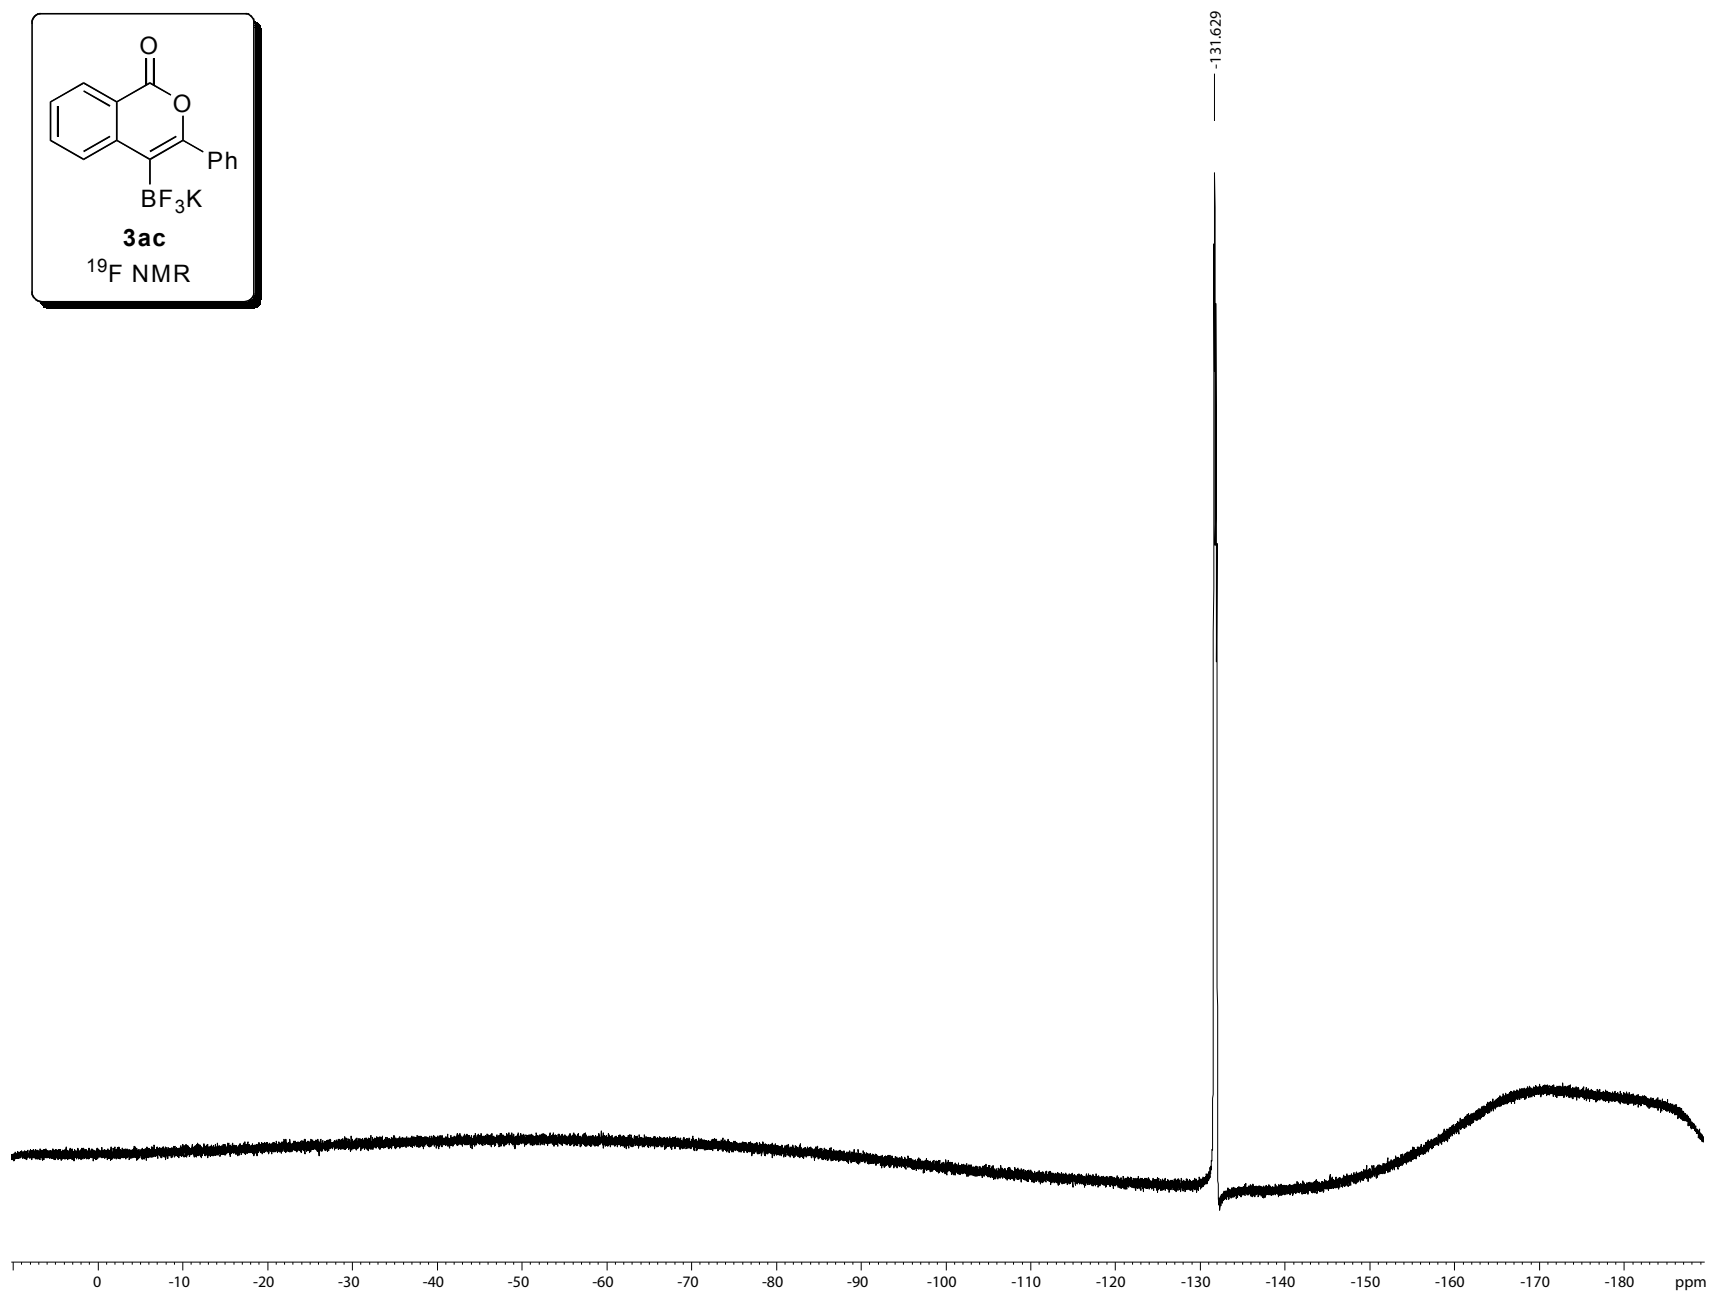

8.250  
8.234  
8.053  
8.037  
7.668  
7.665  
7.655  
7.651  
7.637  
7.634  
7.415  
7.400  
7.385

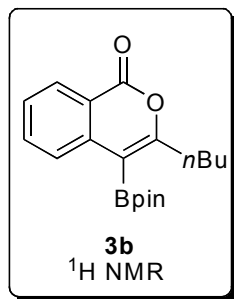

2.819  
2.804  
2.788

1.717  
1.702  
1.687  
1.672  
1.656  
1.387  
1.383

0.939  
0.924  
0.909

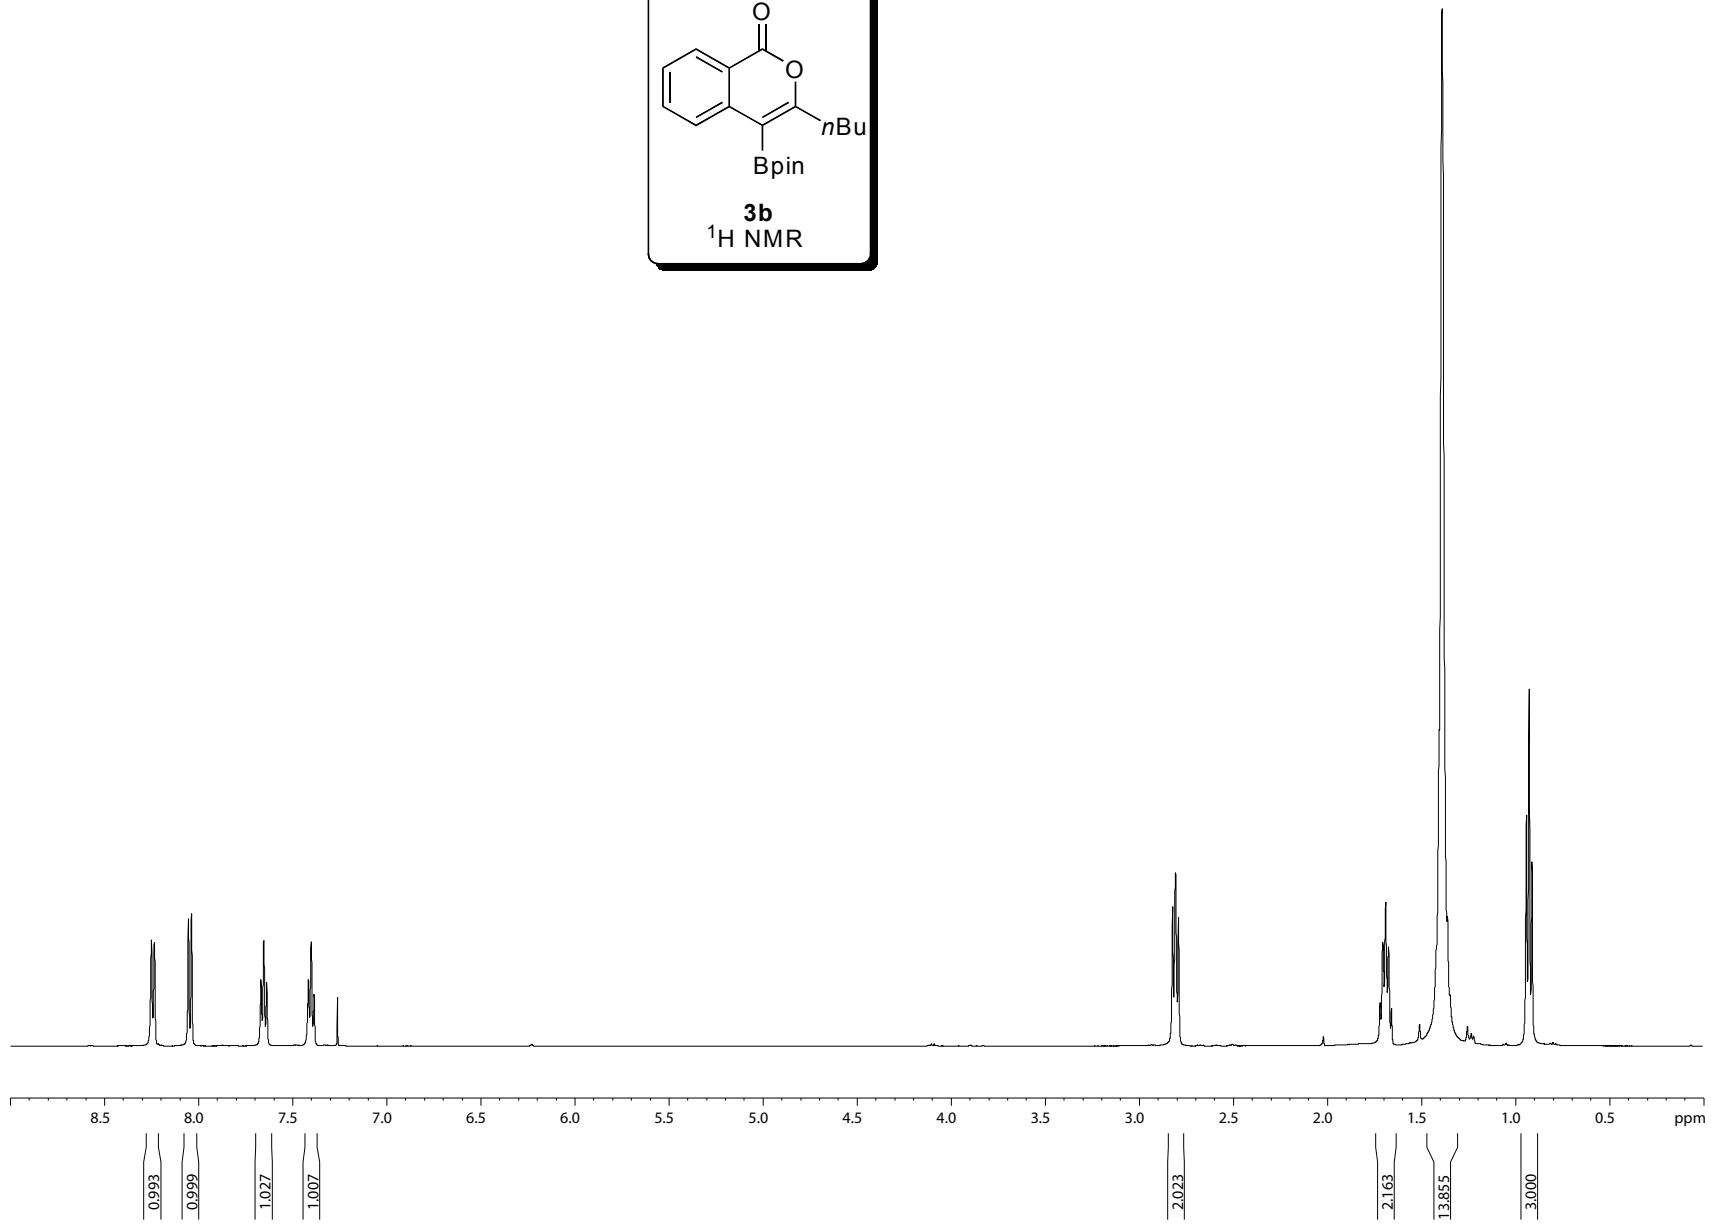

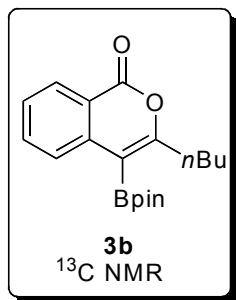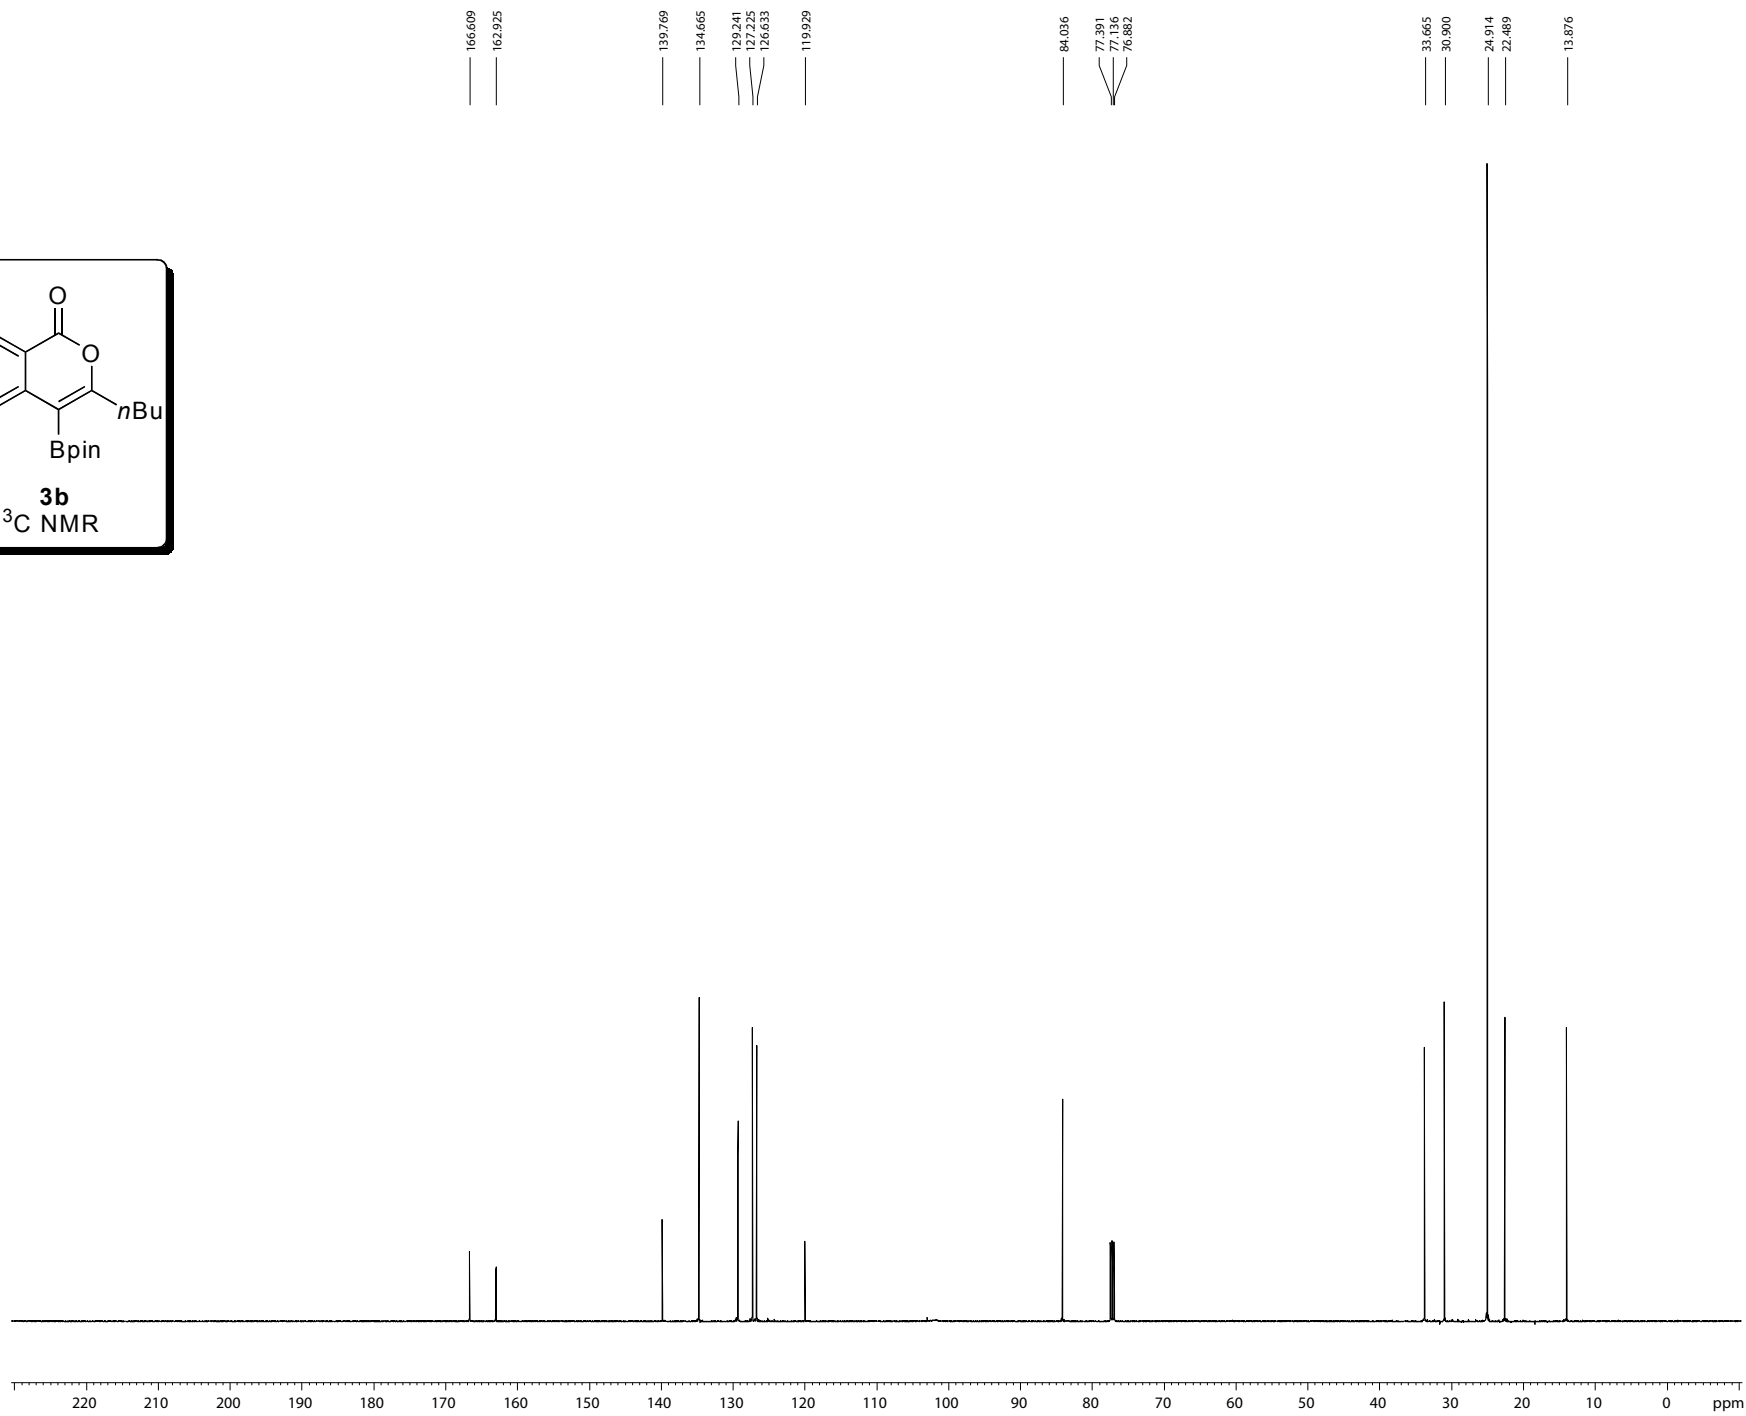

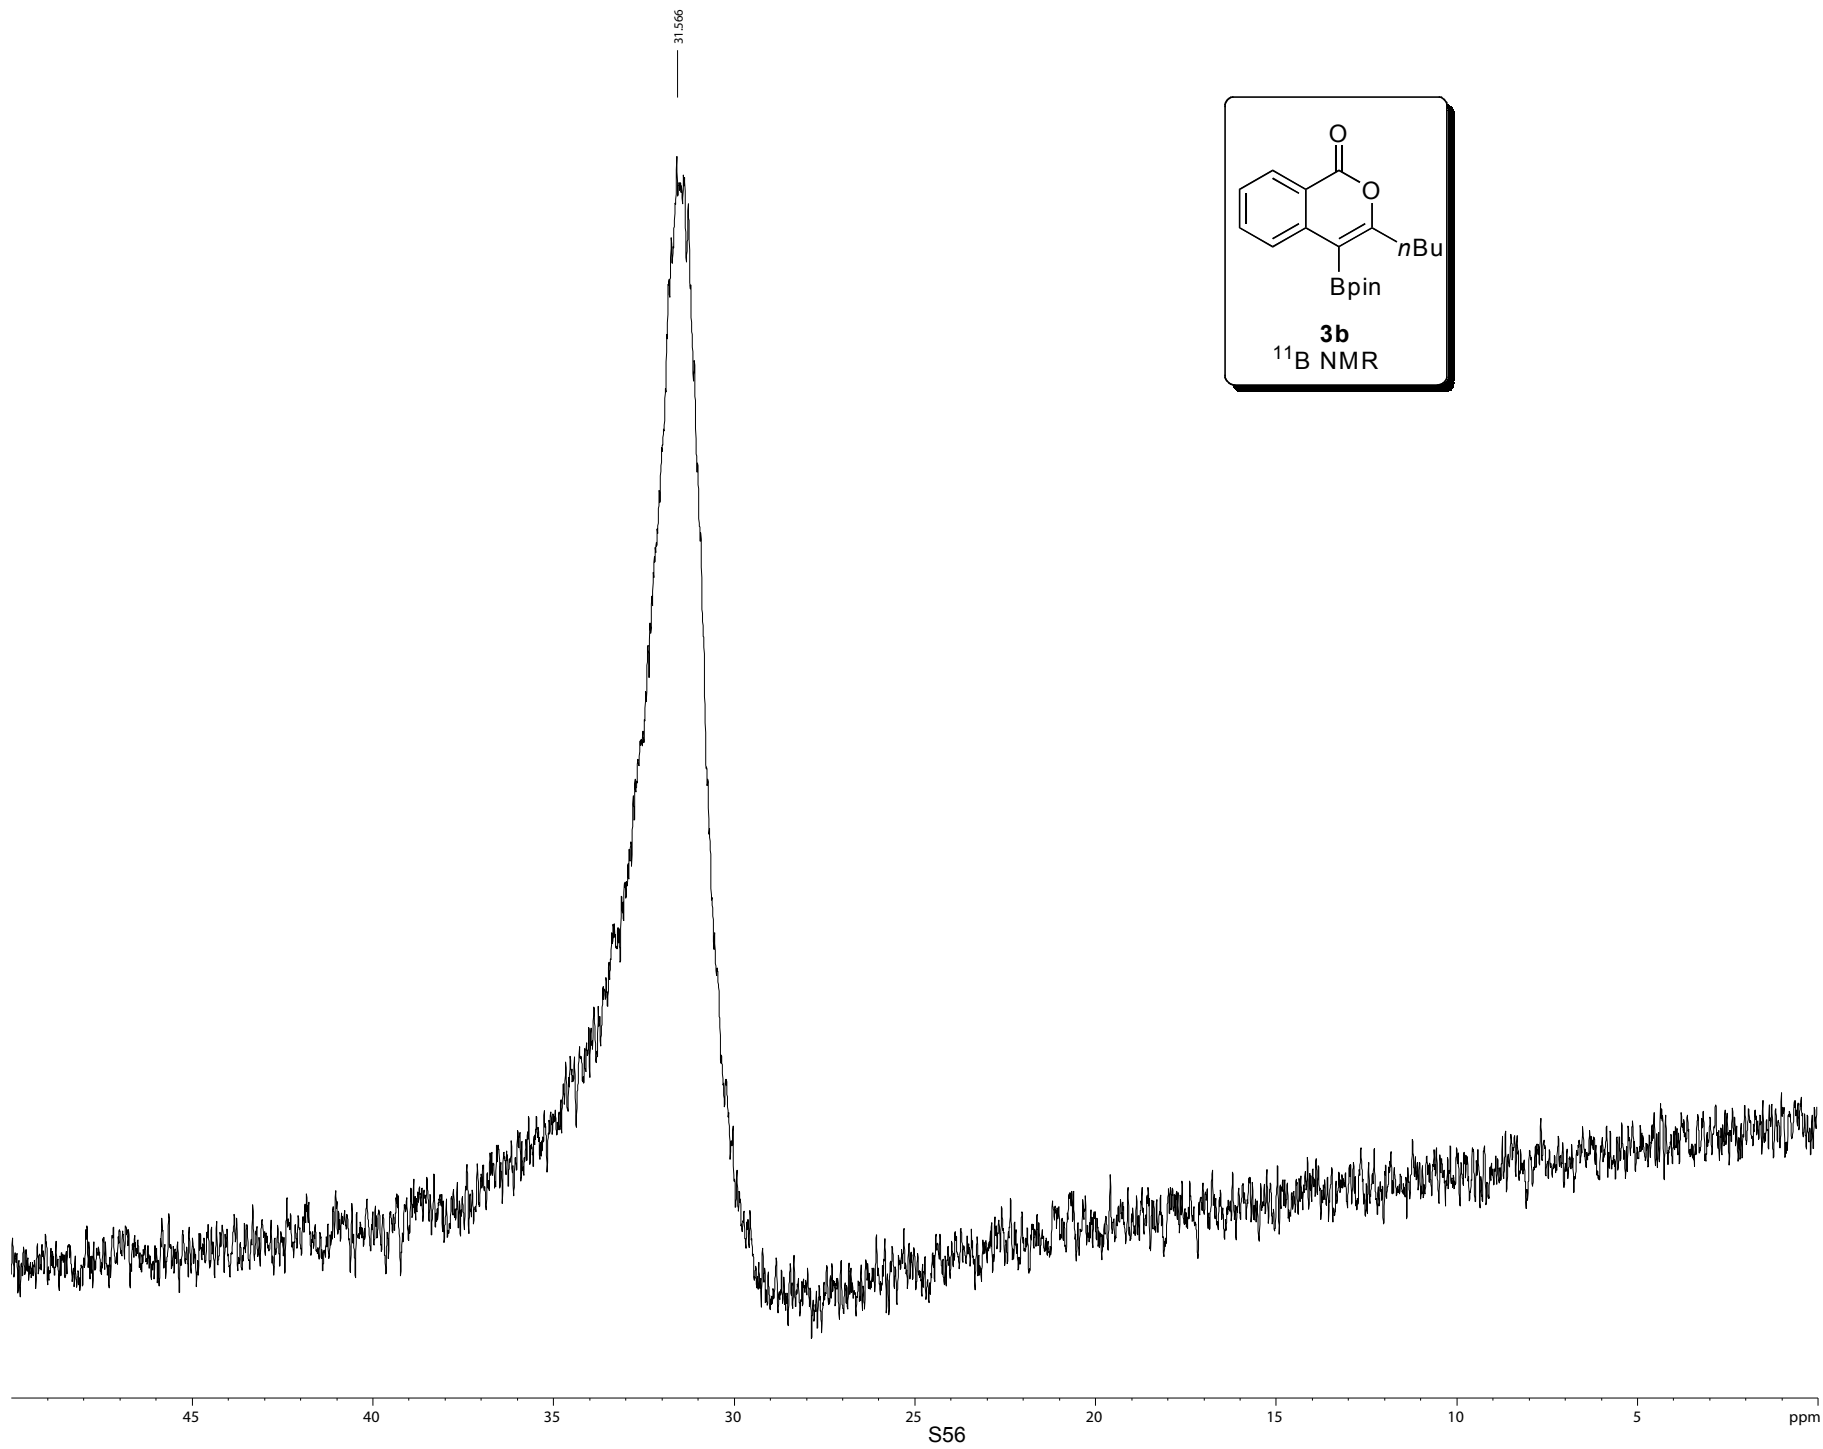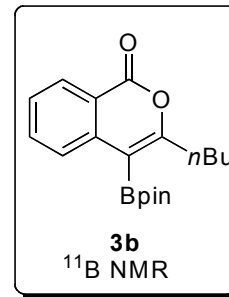



8.598  
8.596  
8.399  
8.383  
8.106  
8.103  
8.090  
8.087  
7.705  
7.703  
7.700  
7.689  
7.686  
7.489  
7.474  
7.469  
7.463  
7.460  
7.457  
7.449  
7.437  
7.434  
7.424  
7.421  
7.417

3.980

1.339

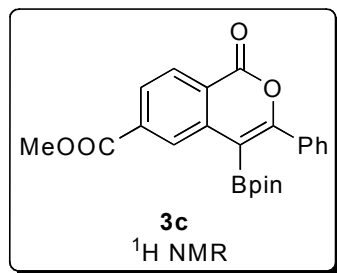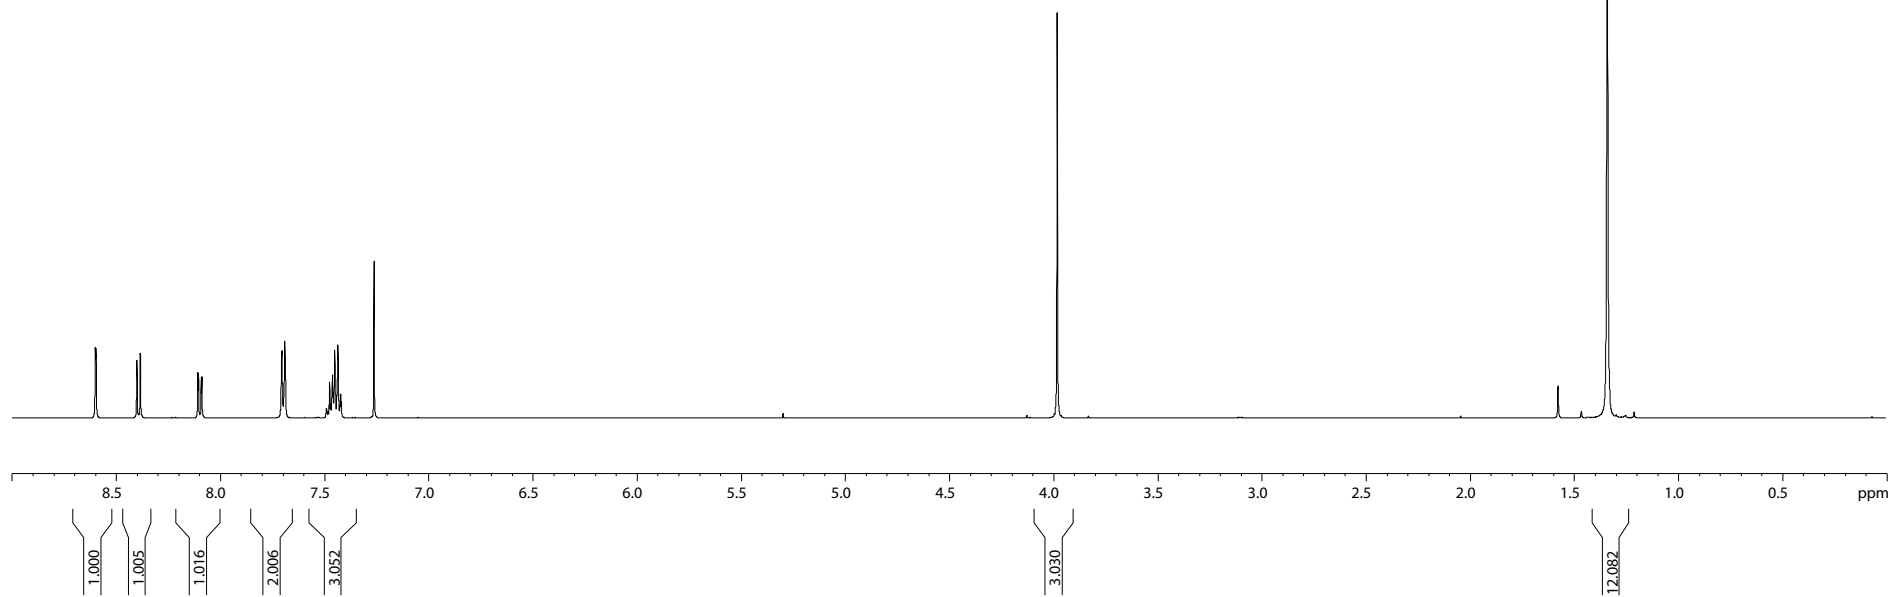

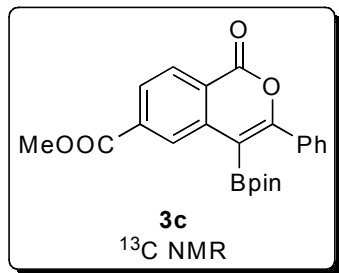

166.049  
161.784  
160.309  
139.695  
135.415  
134.231  
132.899  
129.891  
128.824  
128.395  
128.323  
128.059  
123.094

84.810

52.708

24.847

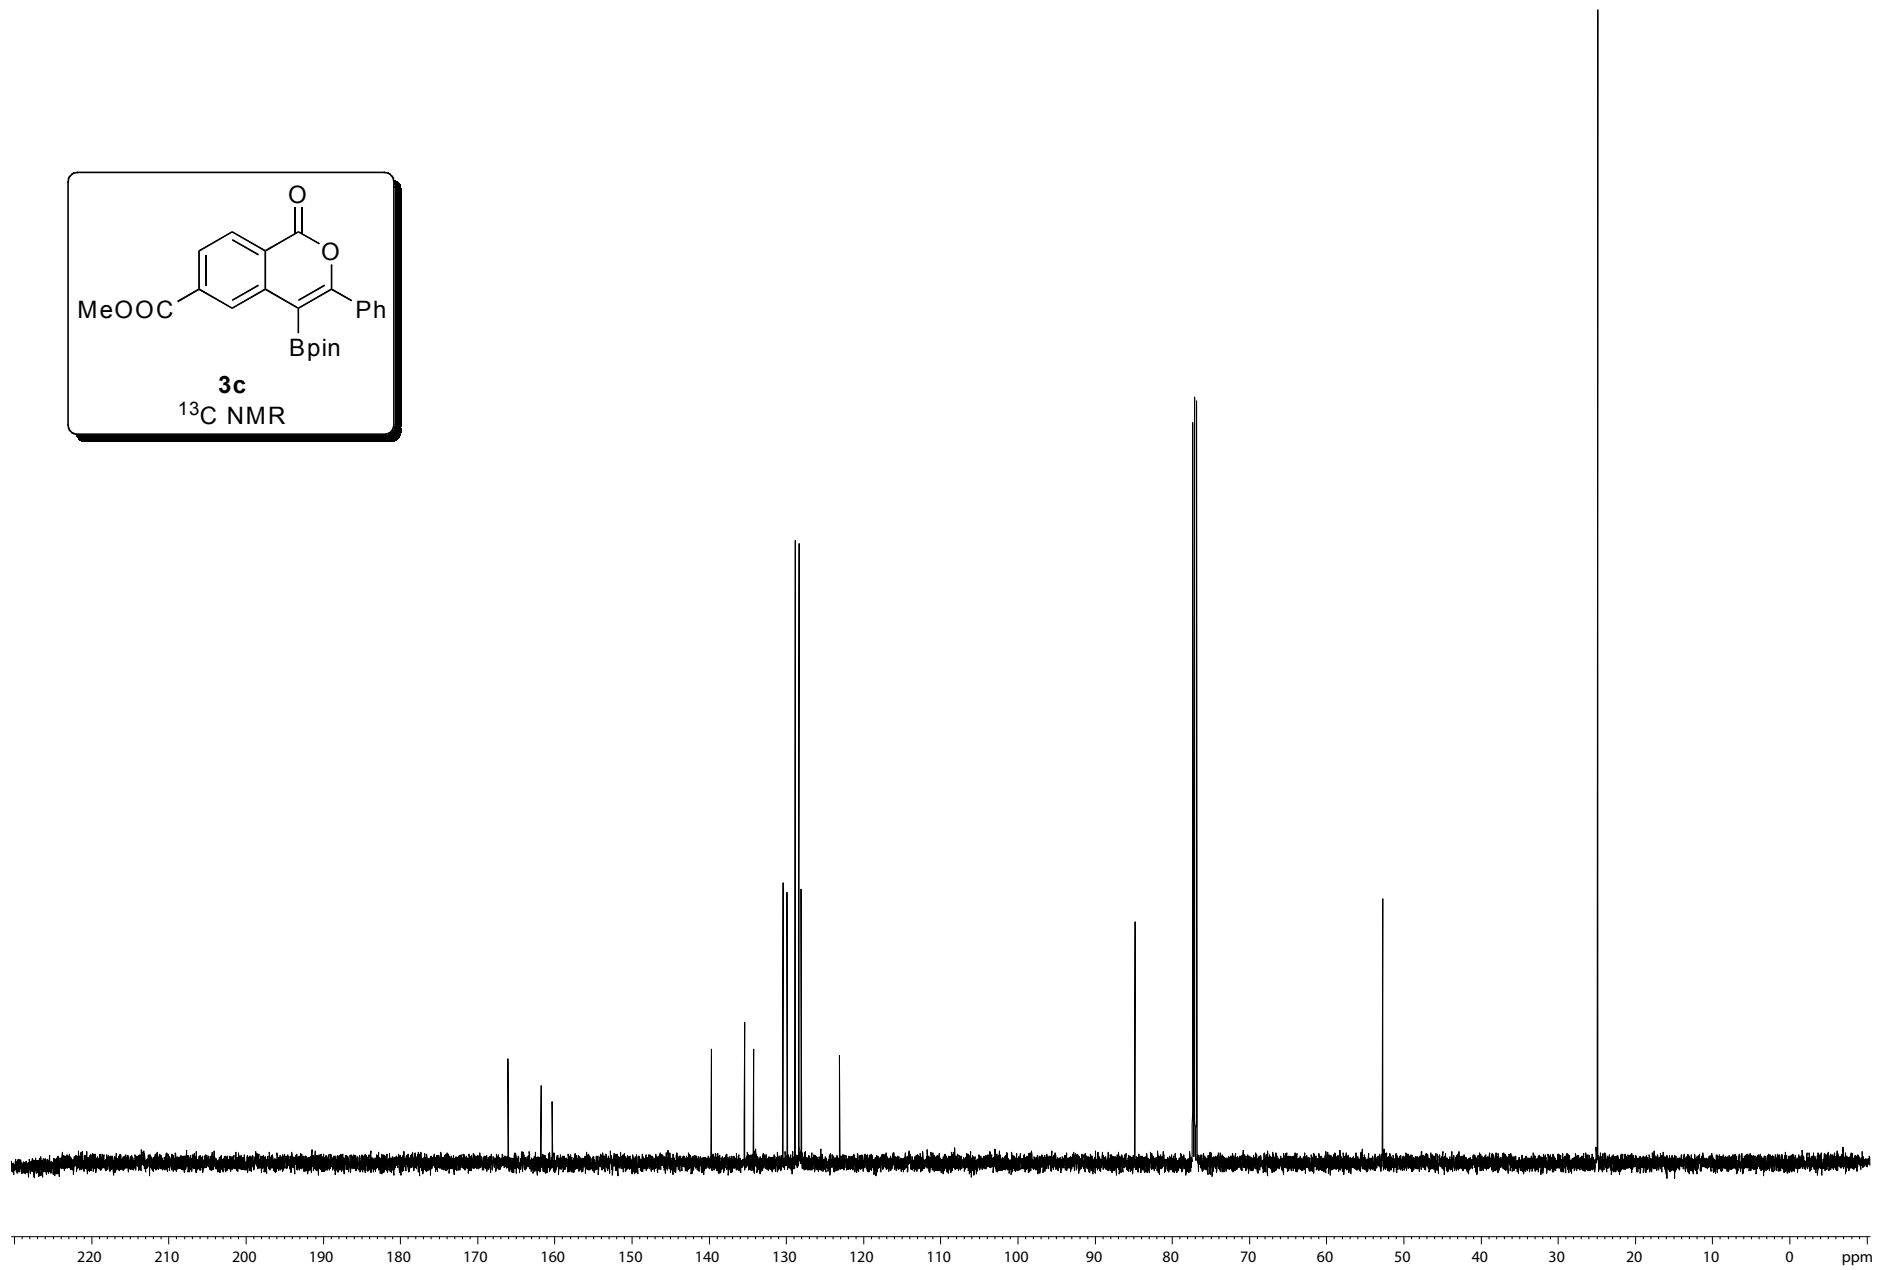

— 31.671

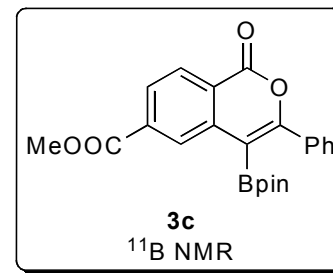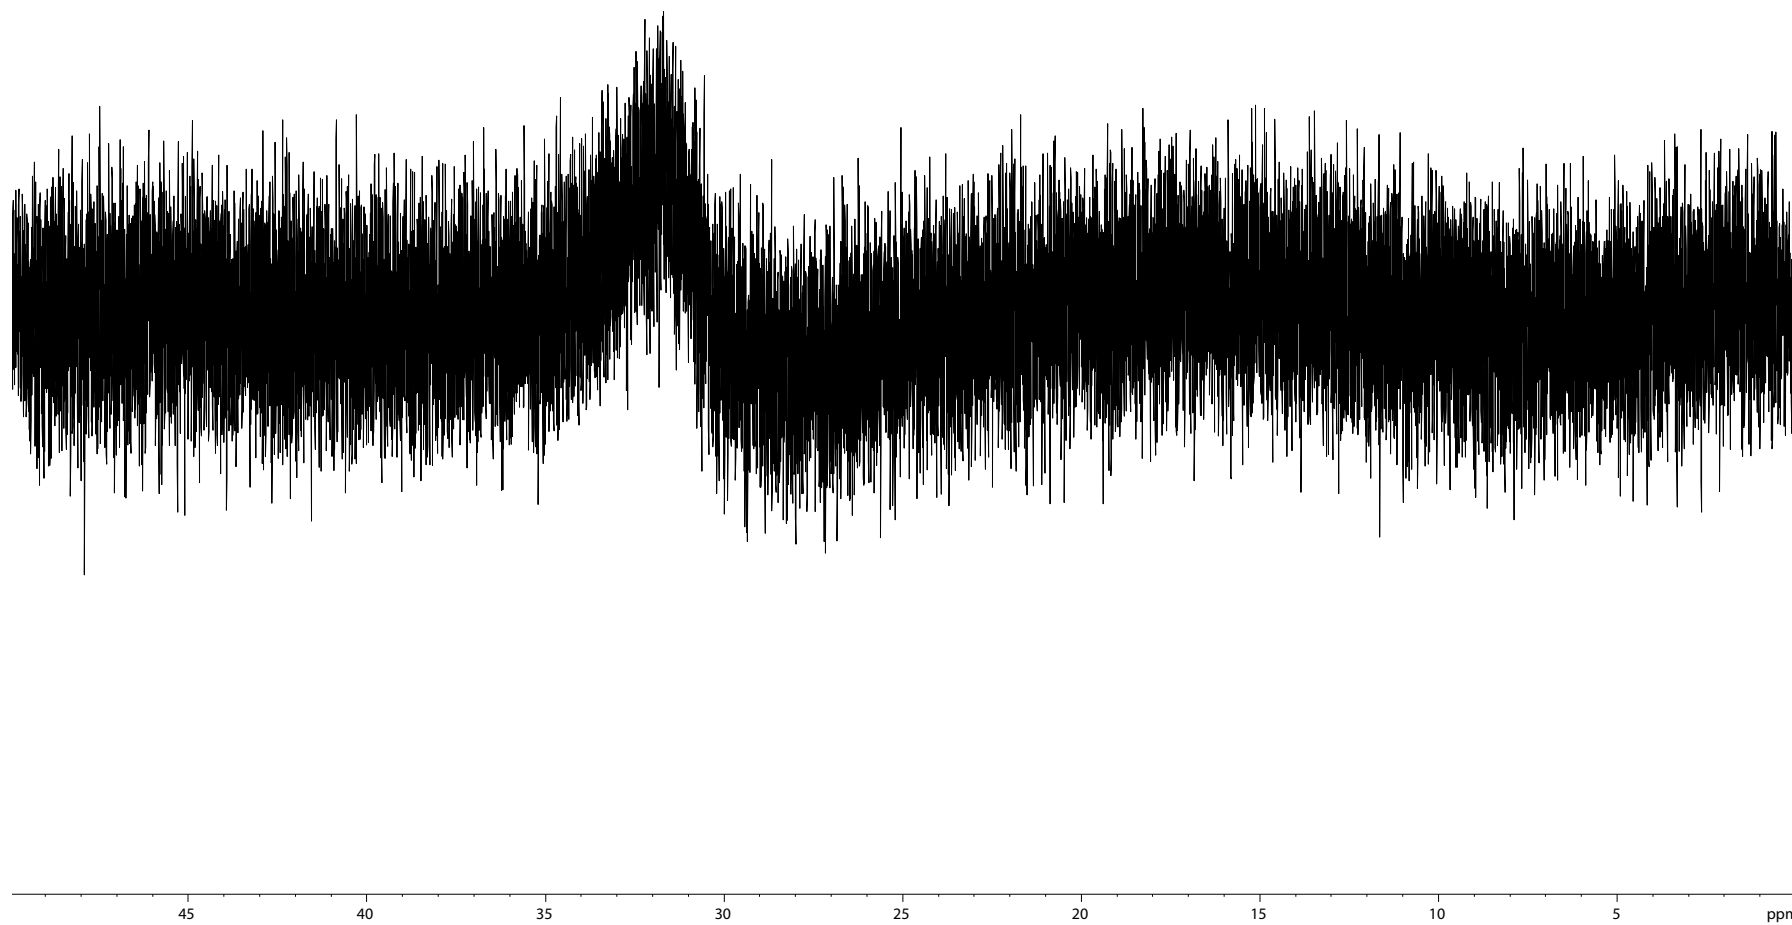

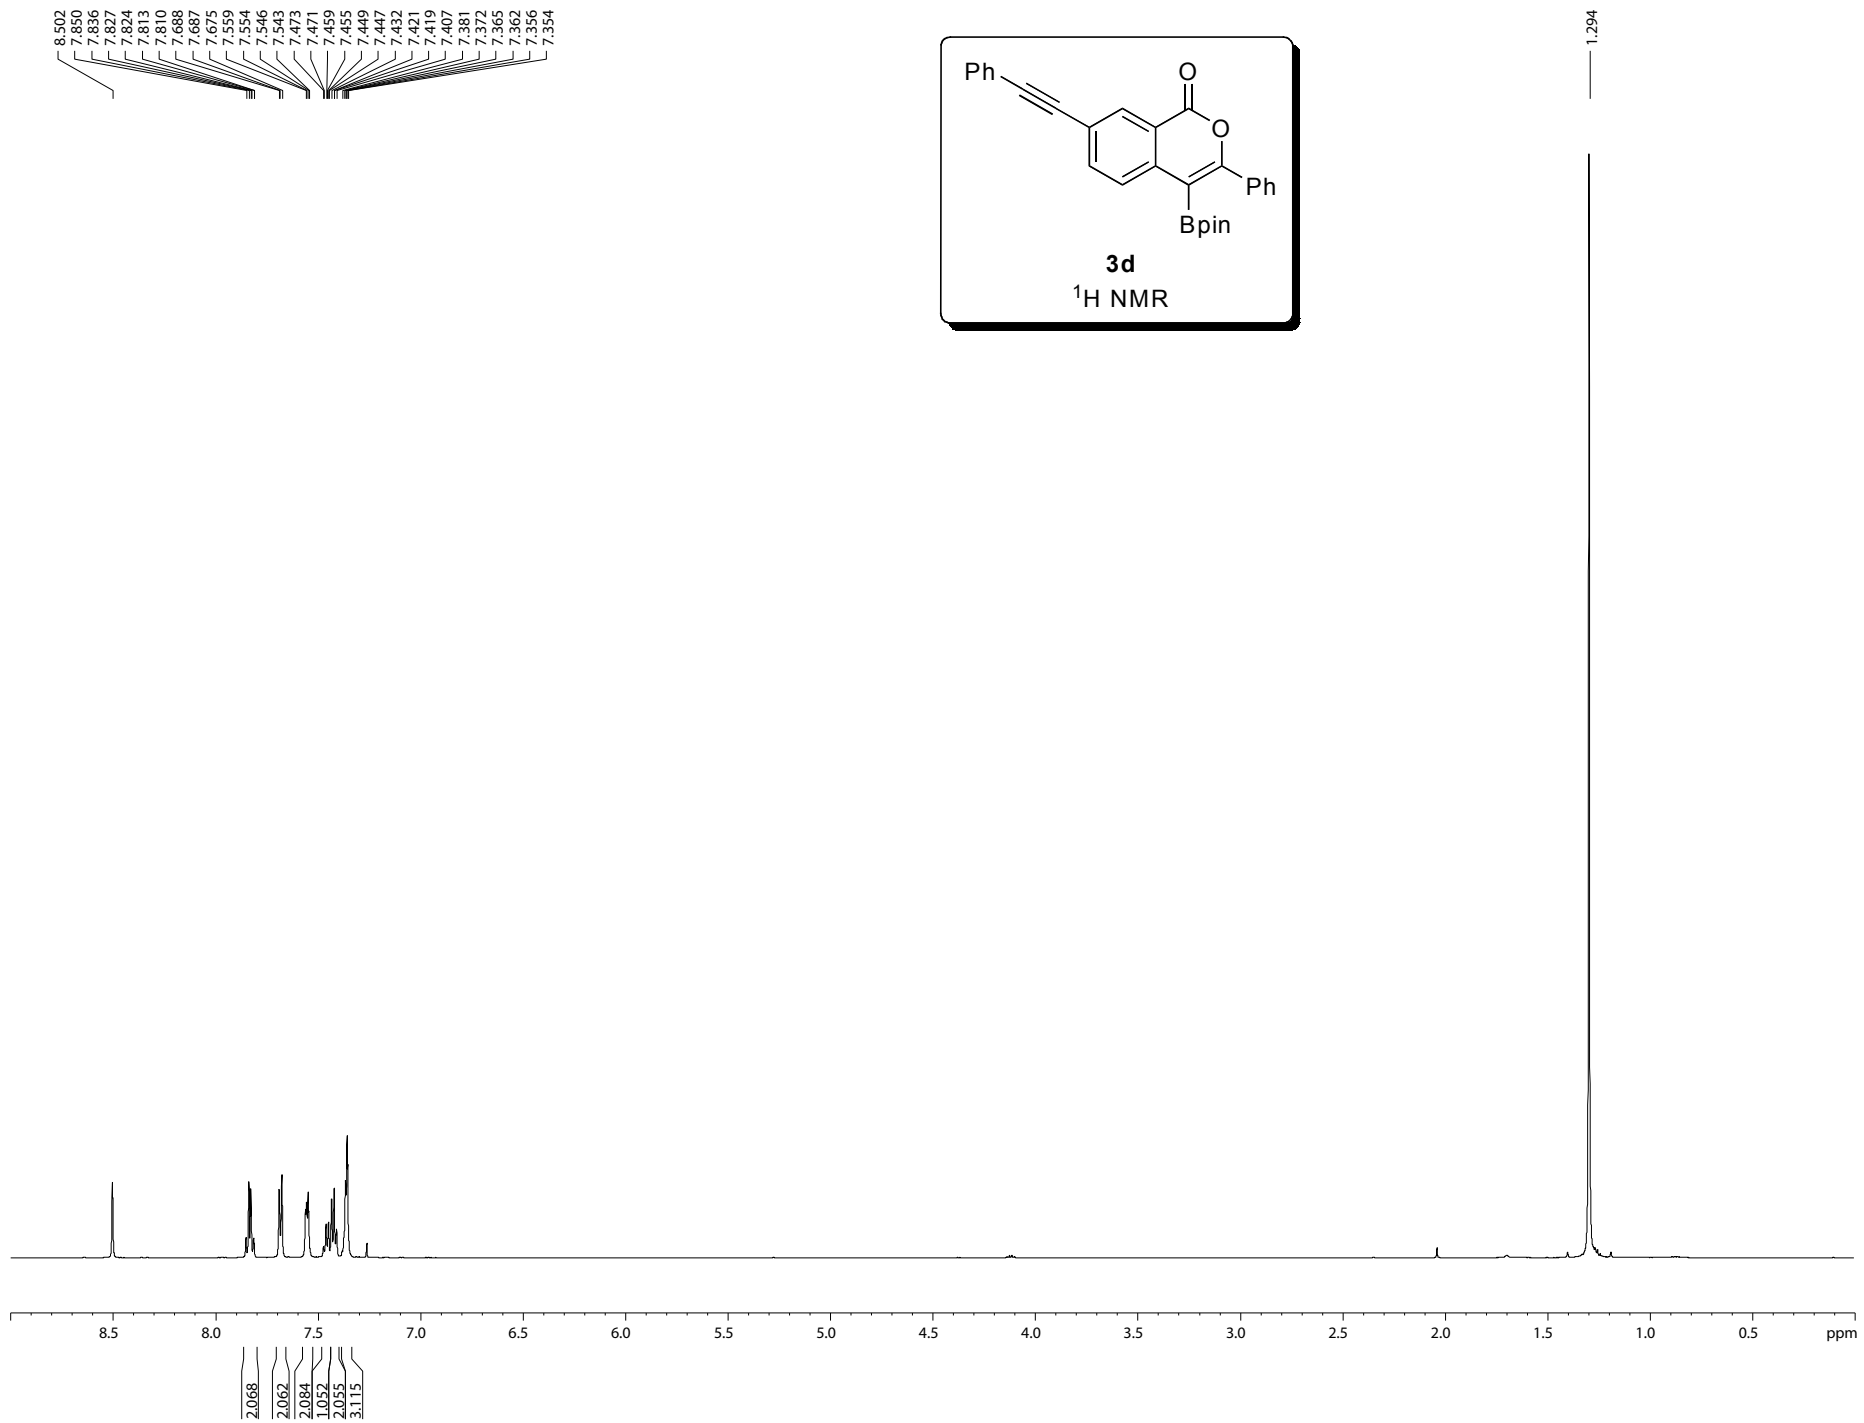

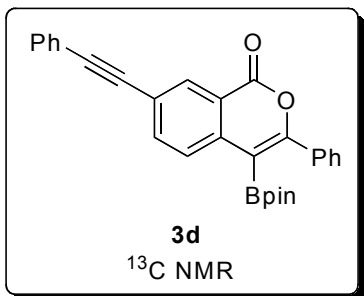

161.724  
160.341

139.151  
137.465  
134.486  
132.741  
131.774  
130.333  
128.940  
128.753  
128.509  
128.411  
128.321  
123.107  
122.786  
120.284

91.509  
88.280  
84.639

24.911

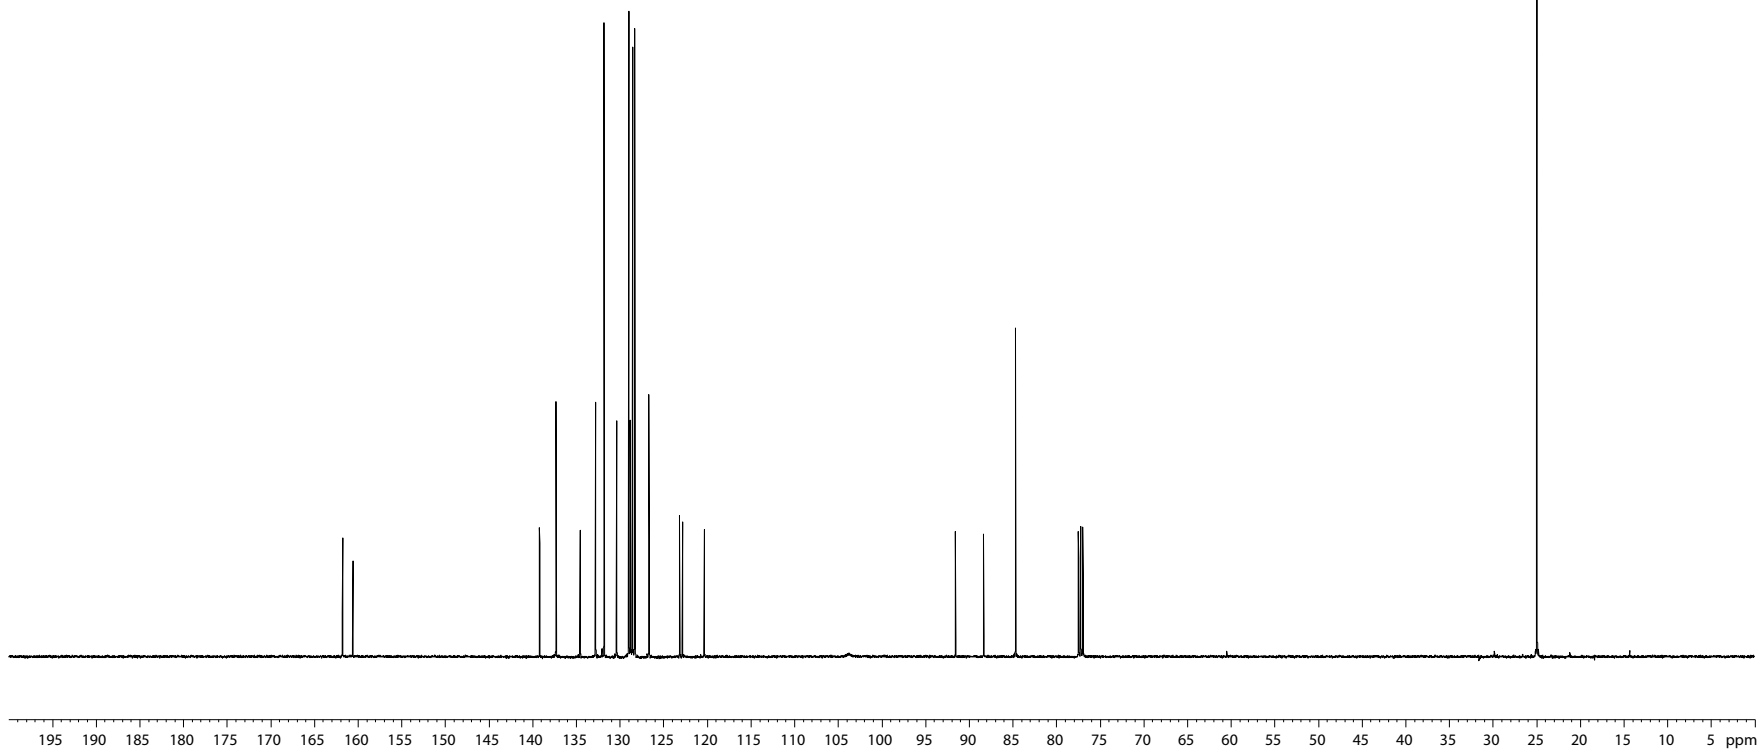

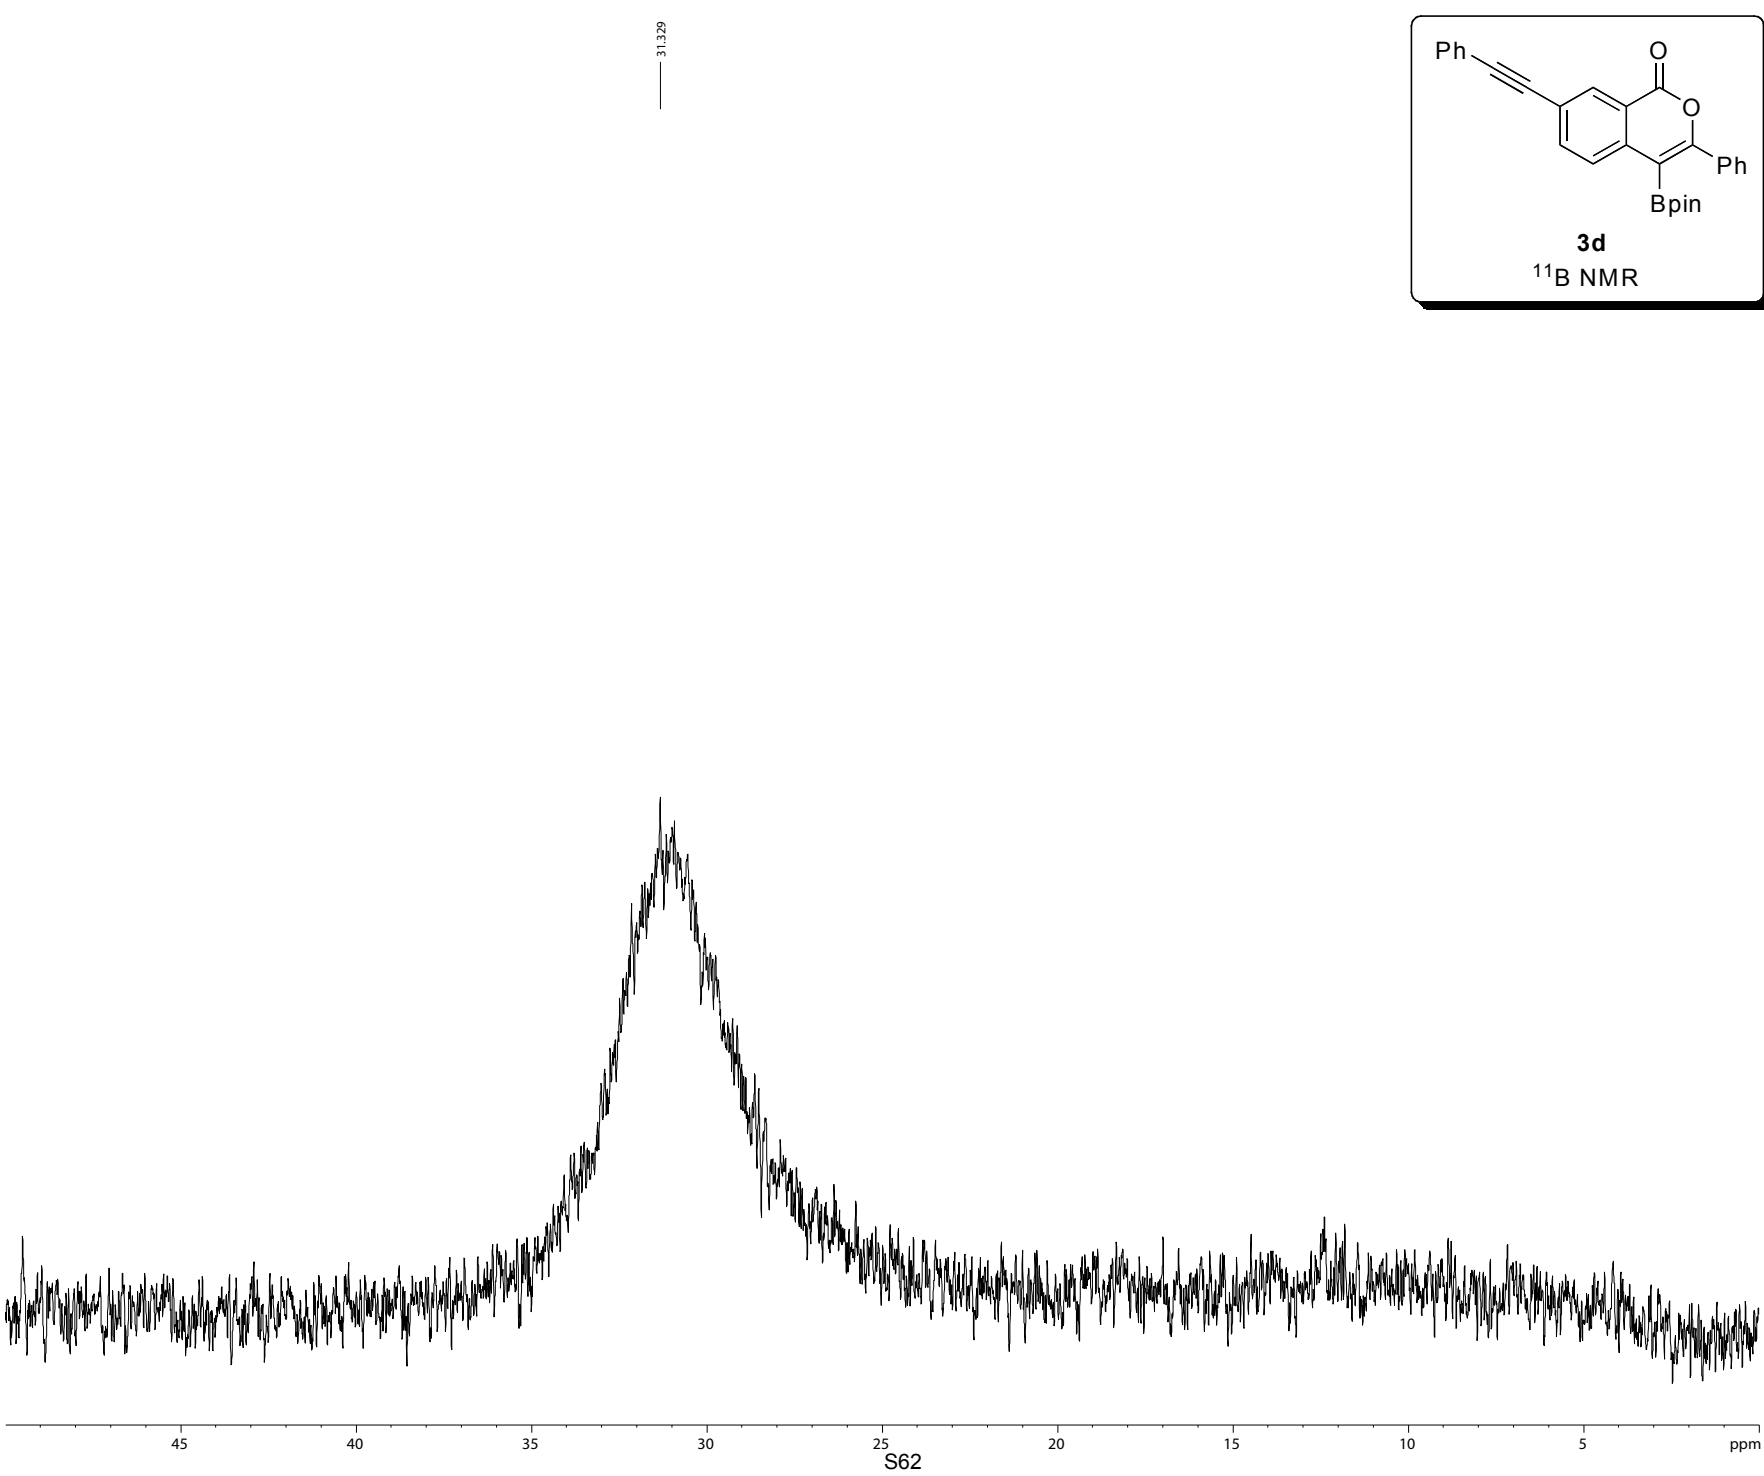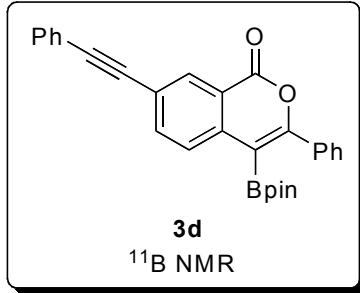

8.254  
8.241  
8.085  
8.071

4.106  
4.094  
4.082  
4.070

2.887  
2.874  
2.862

2.376  
2.364  
2.351  
2.077  
2.064  
2.052  
2.040  
2.027

1.384  
1.254  
1.222  
1.210

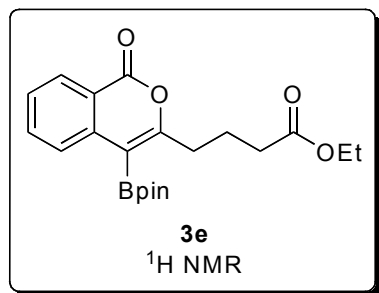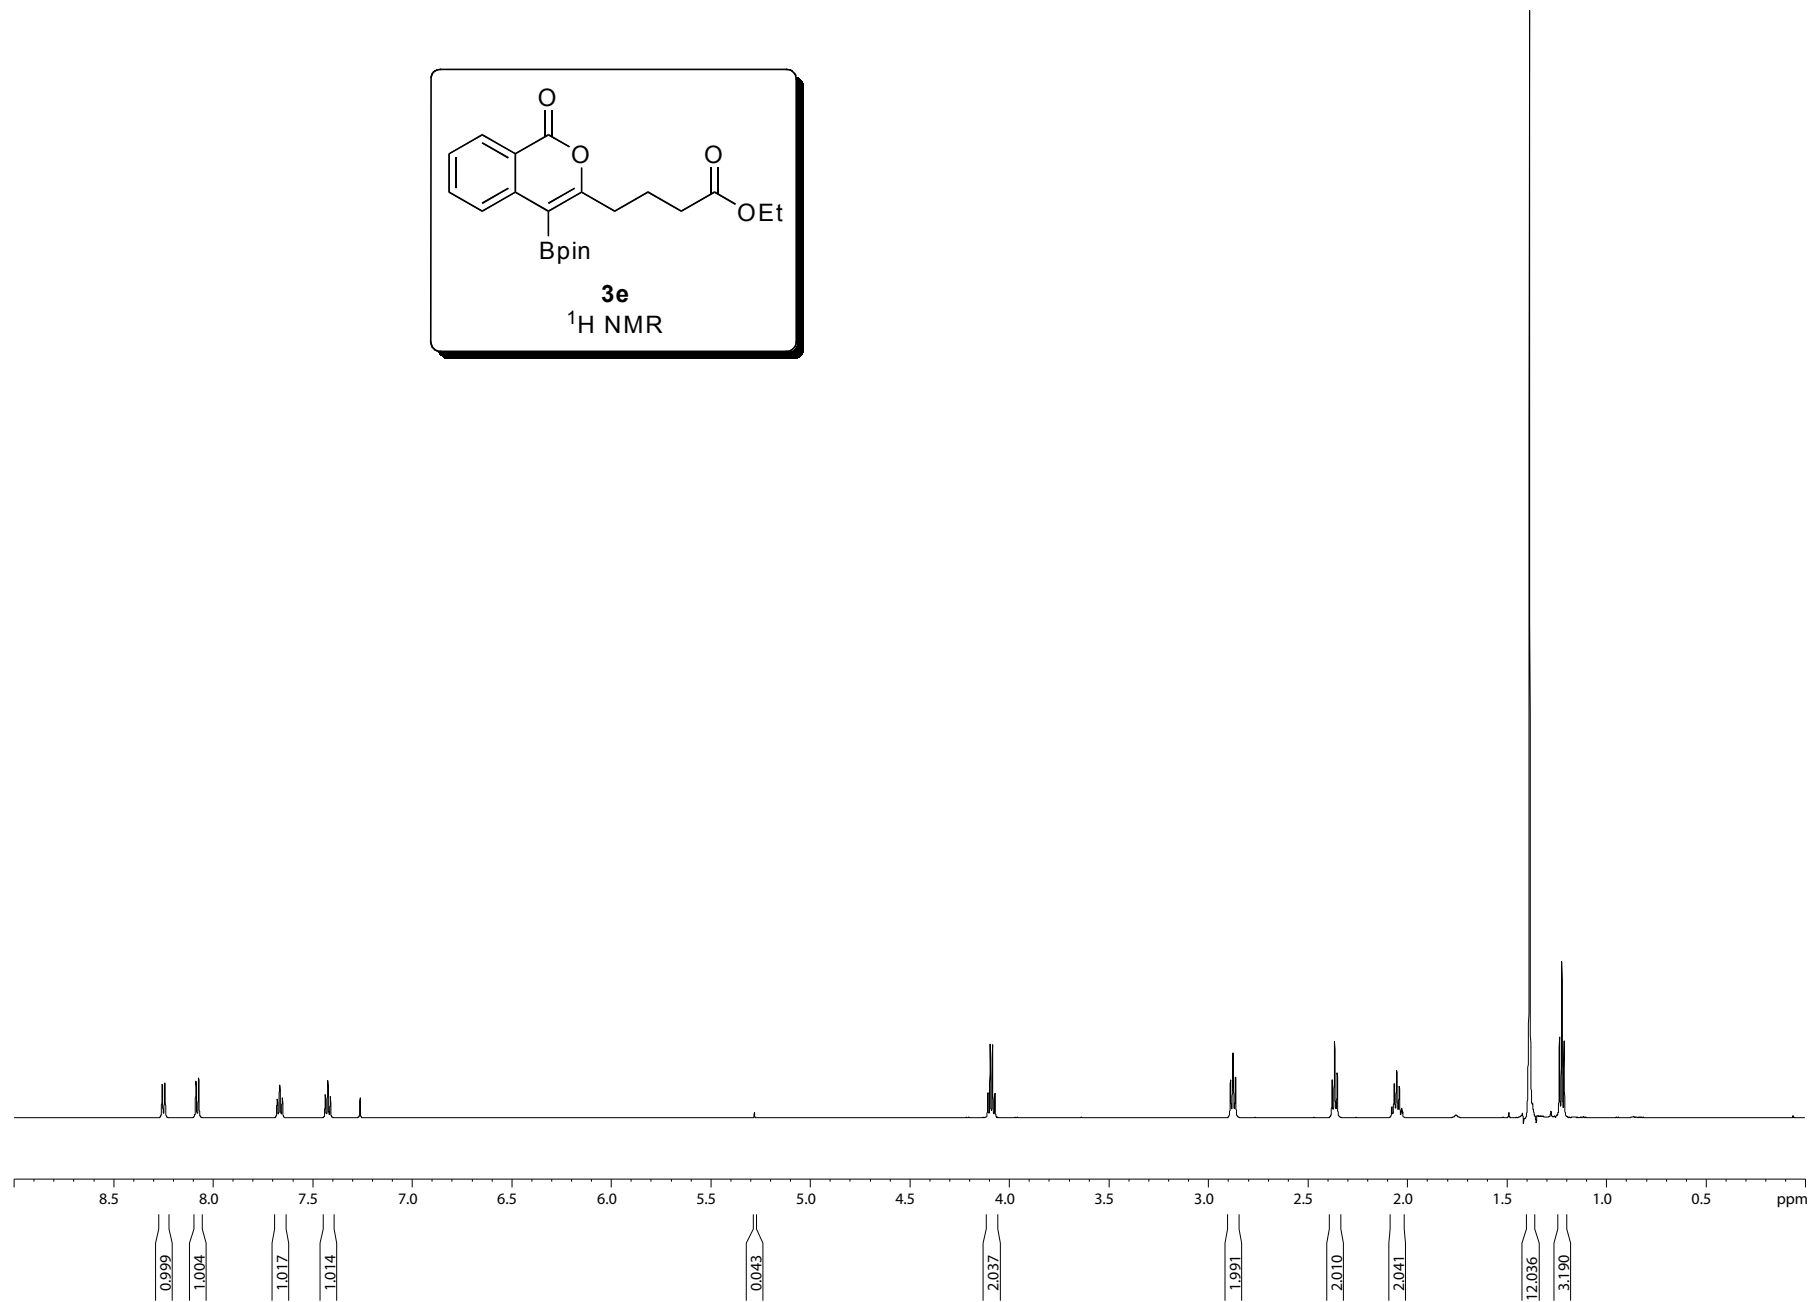

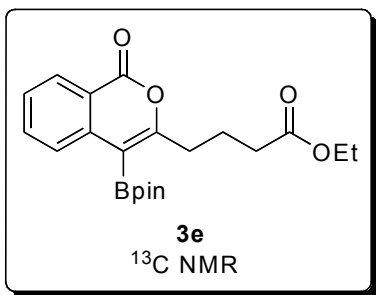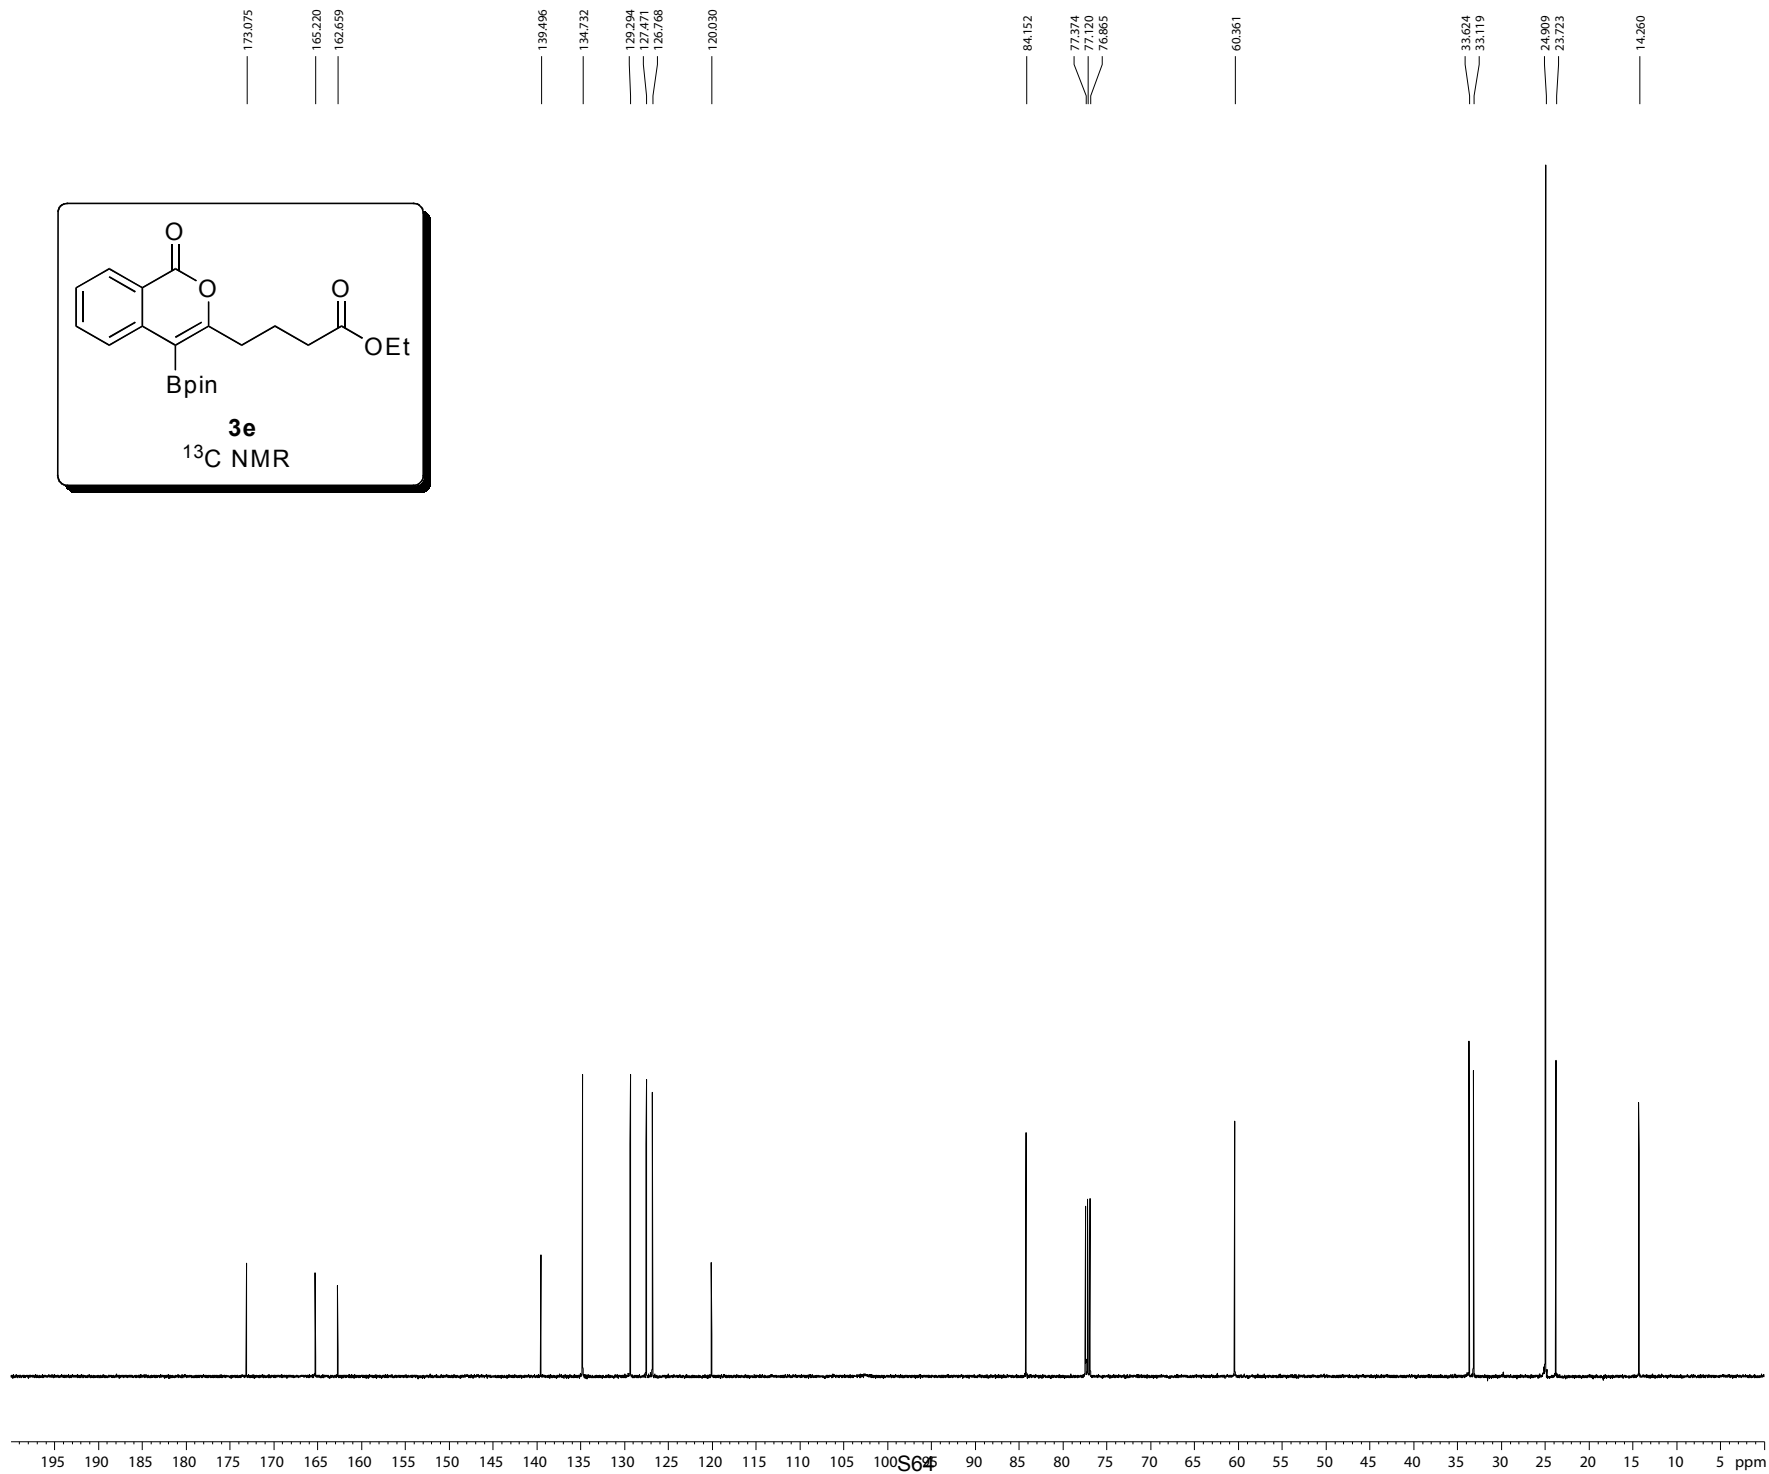



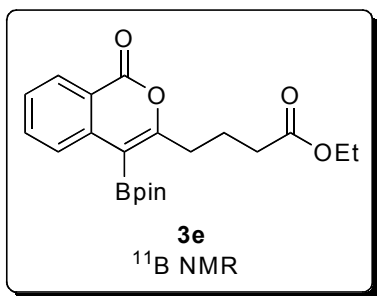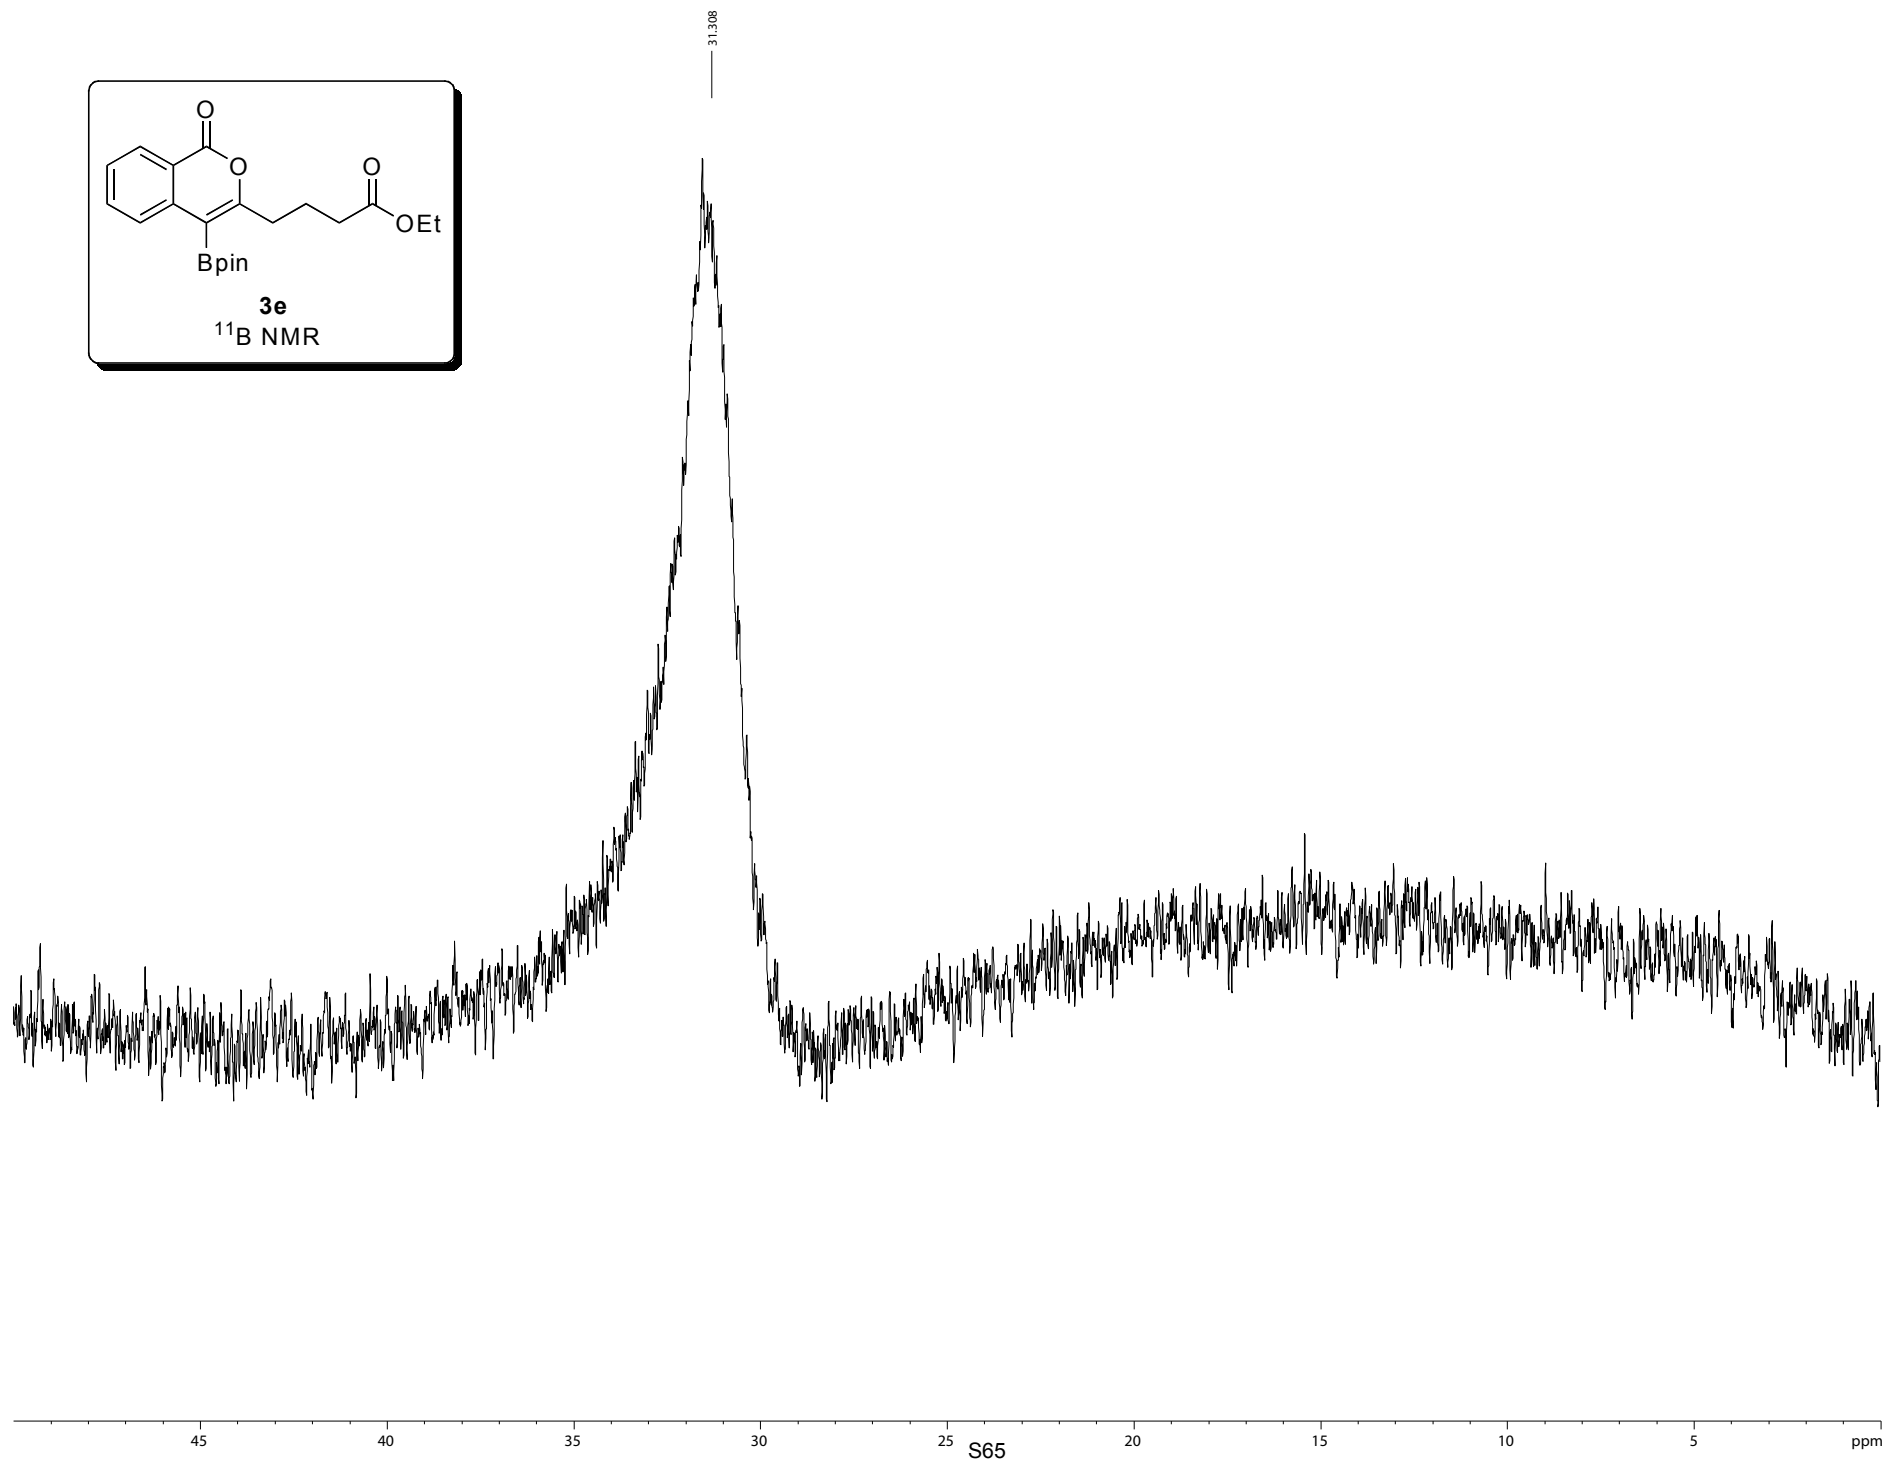

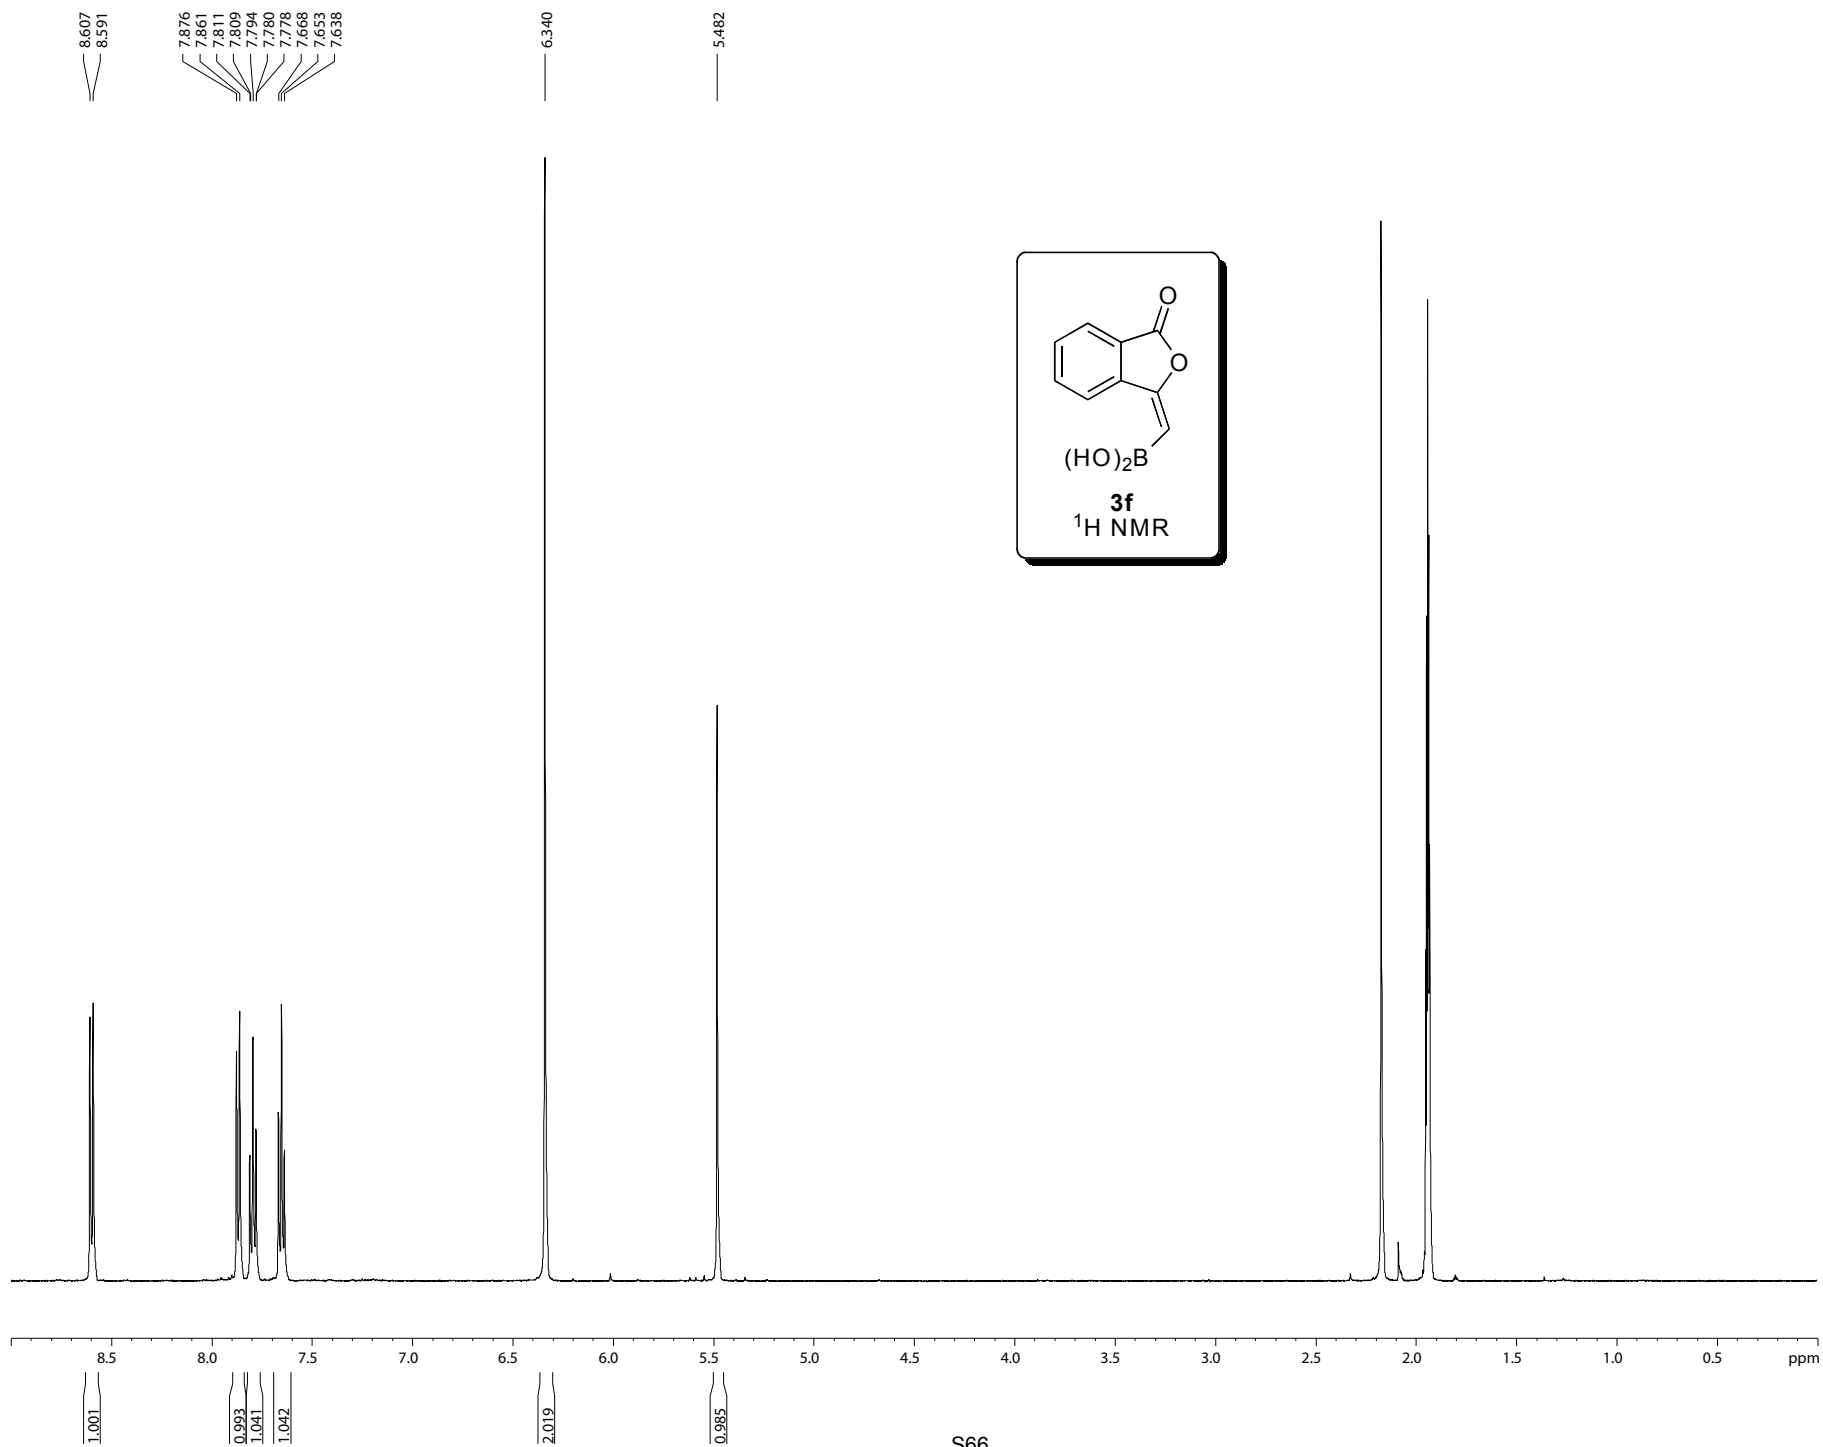

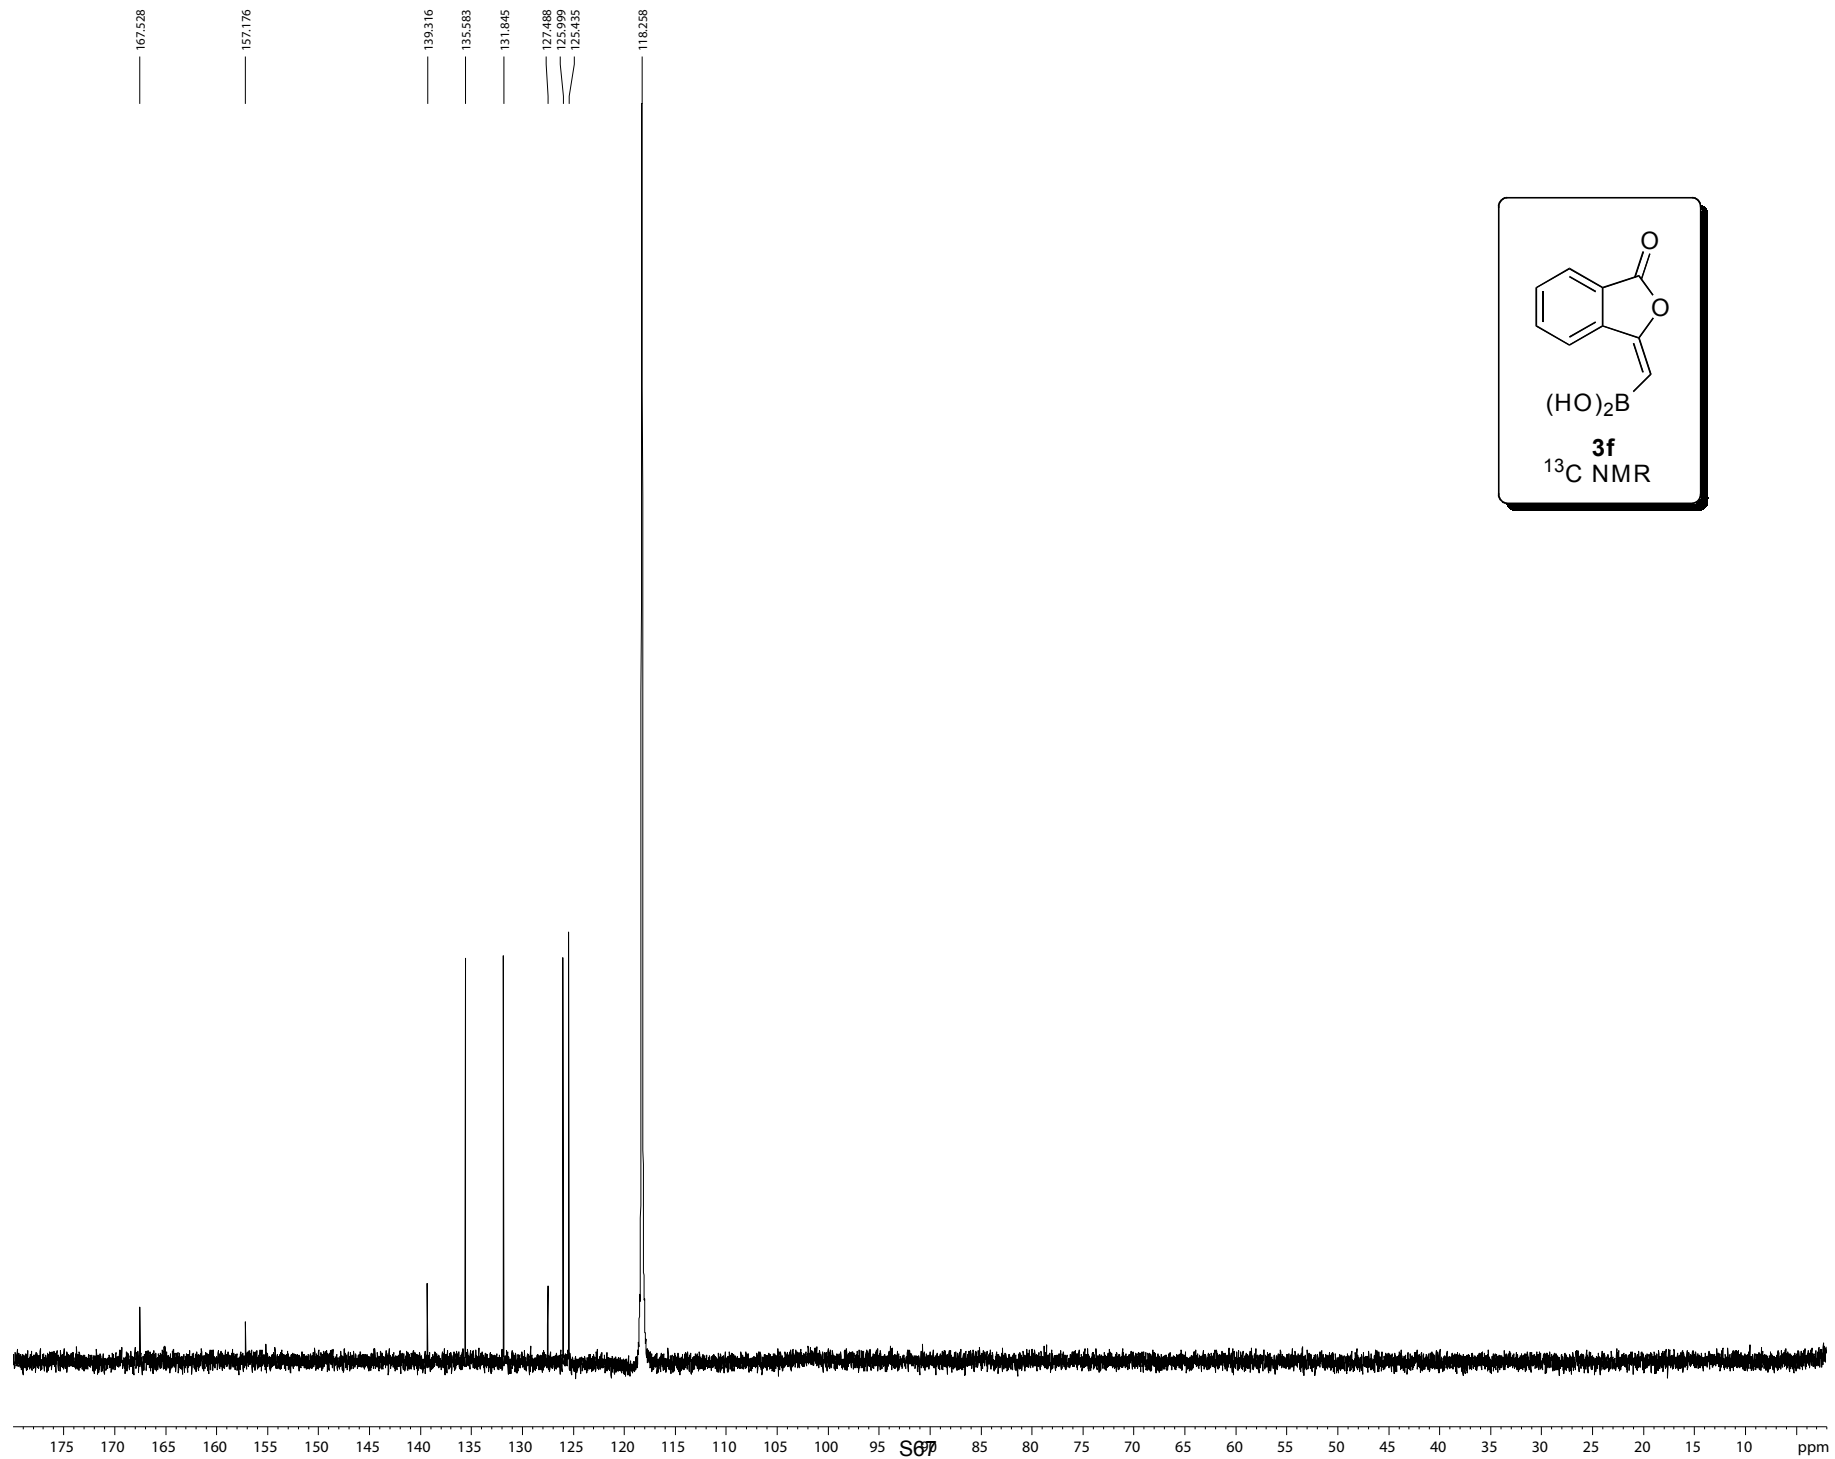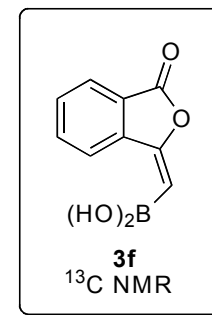

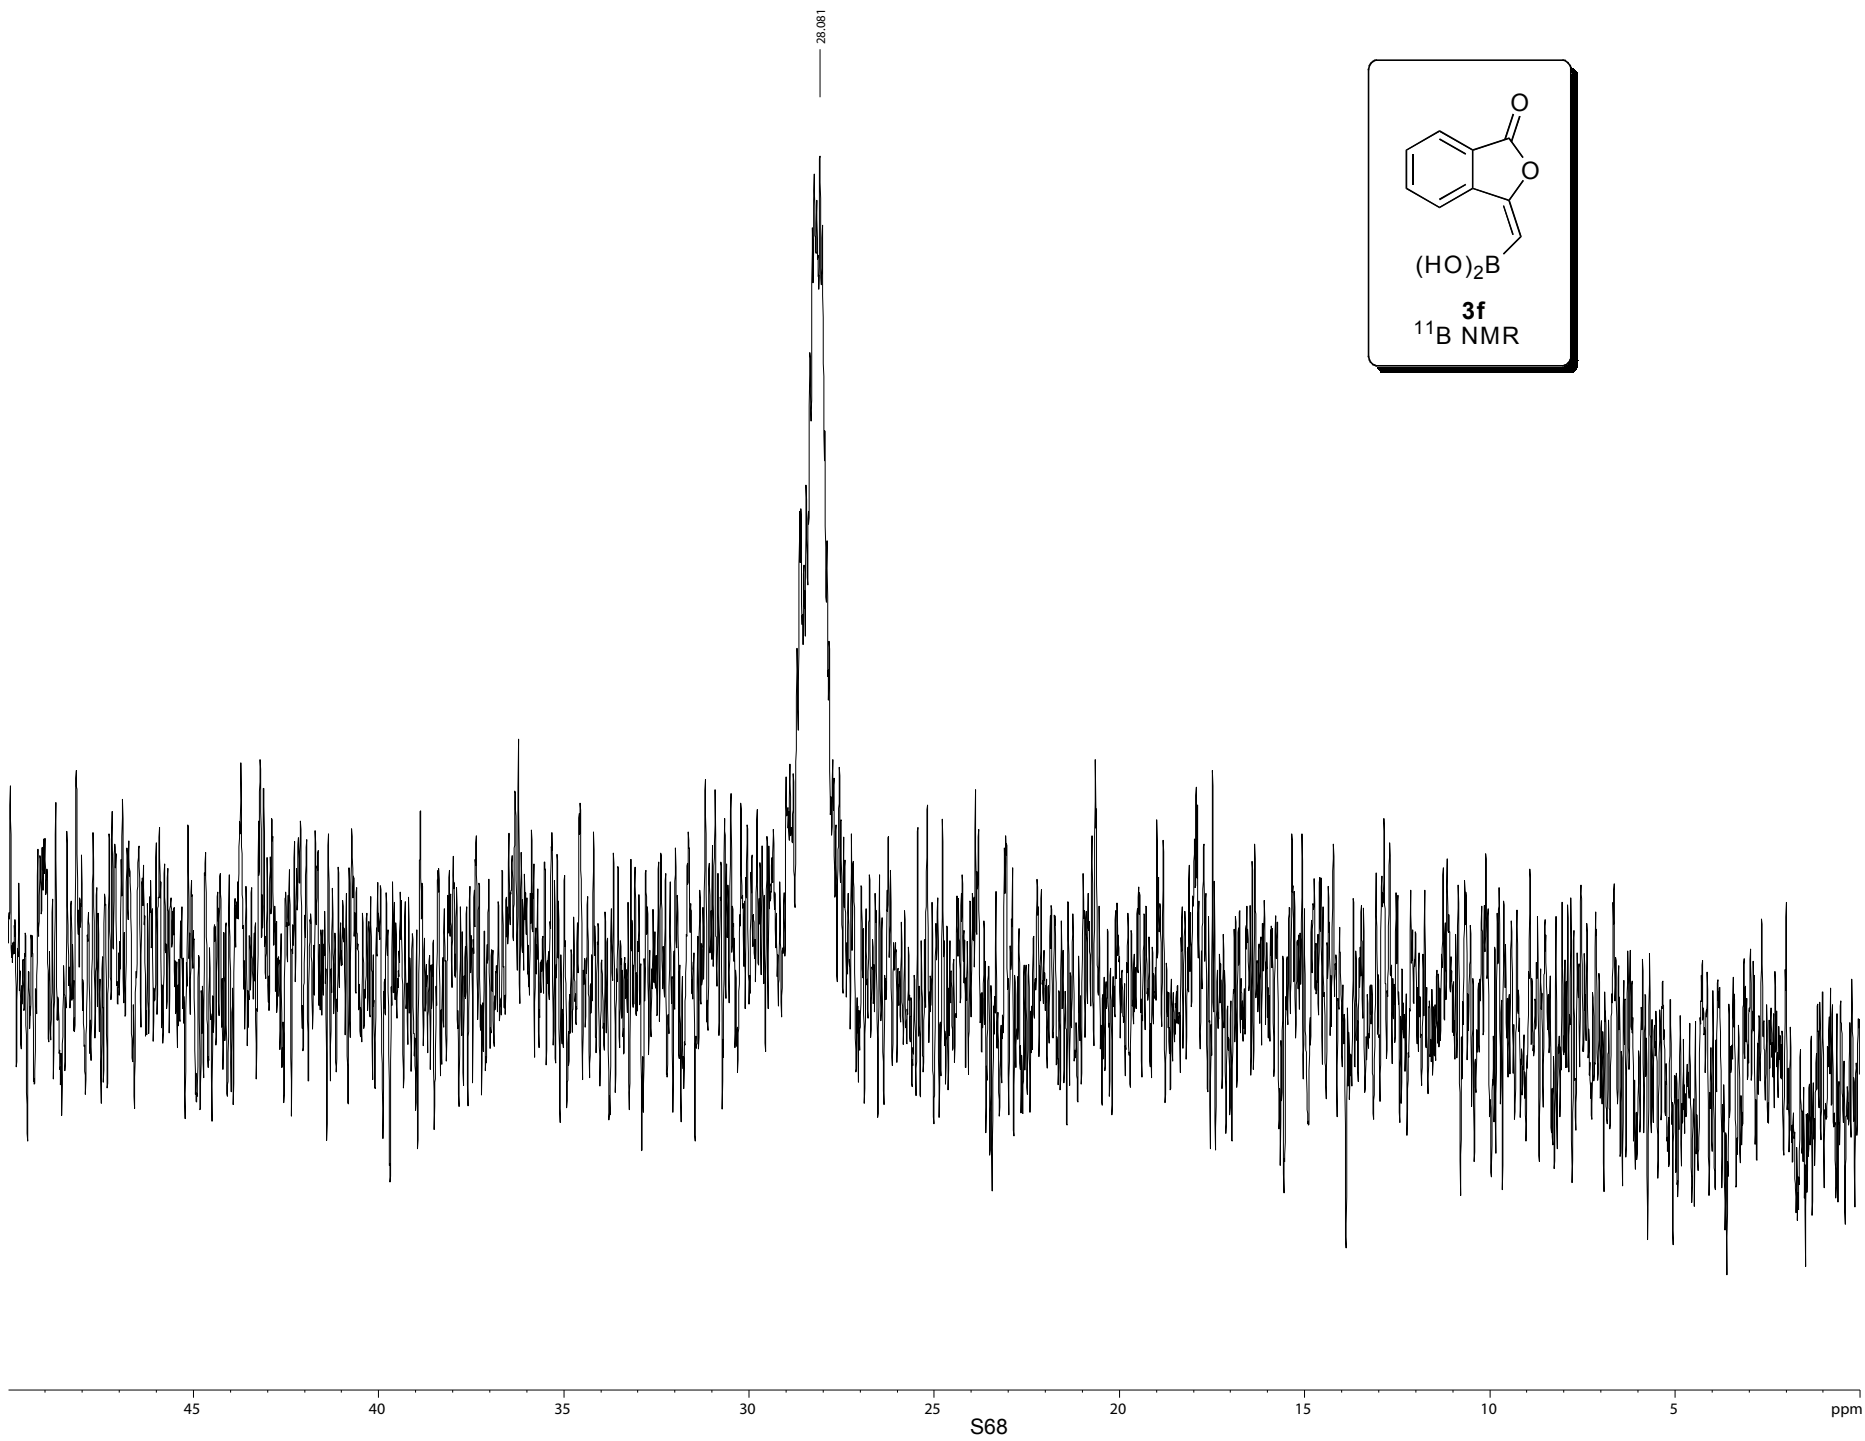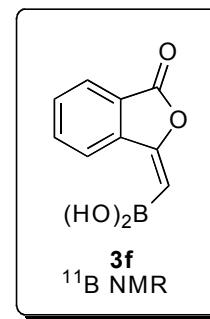

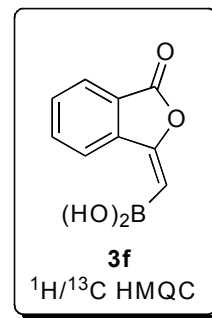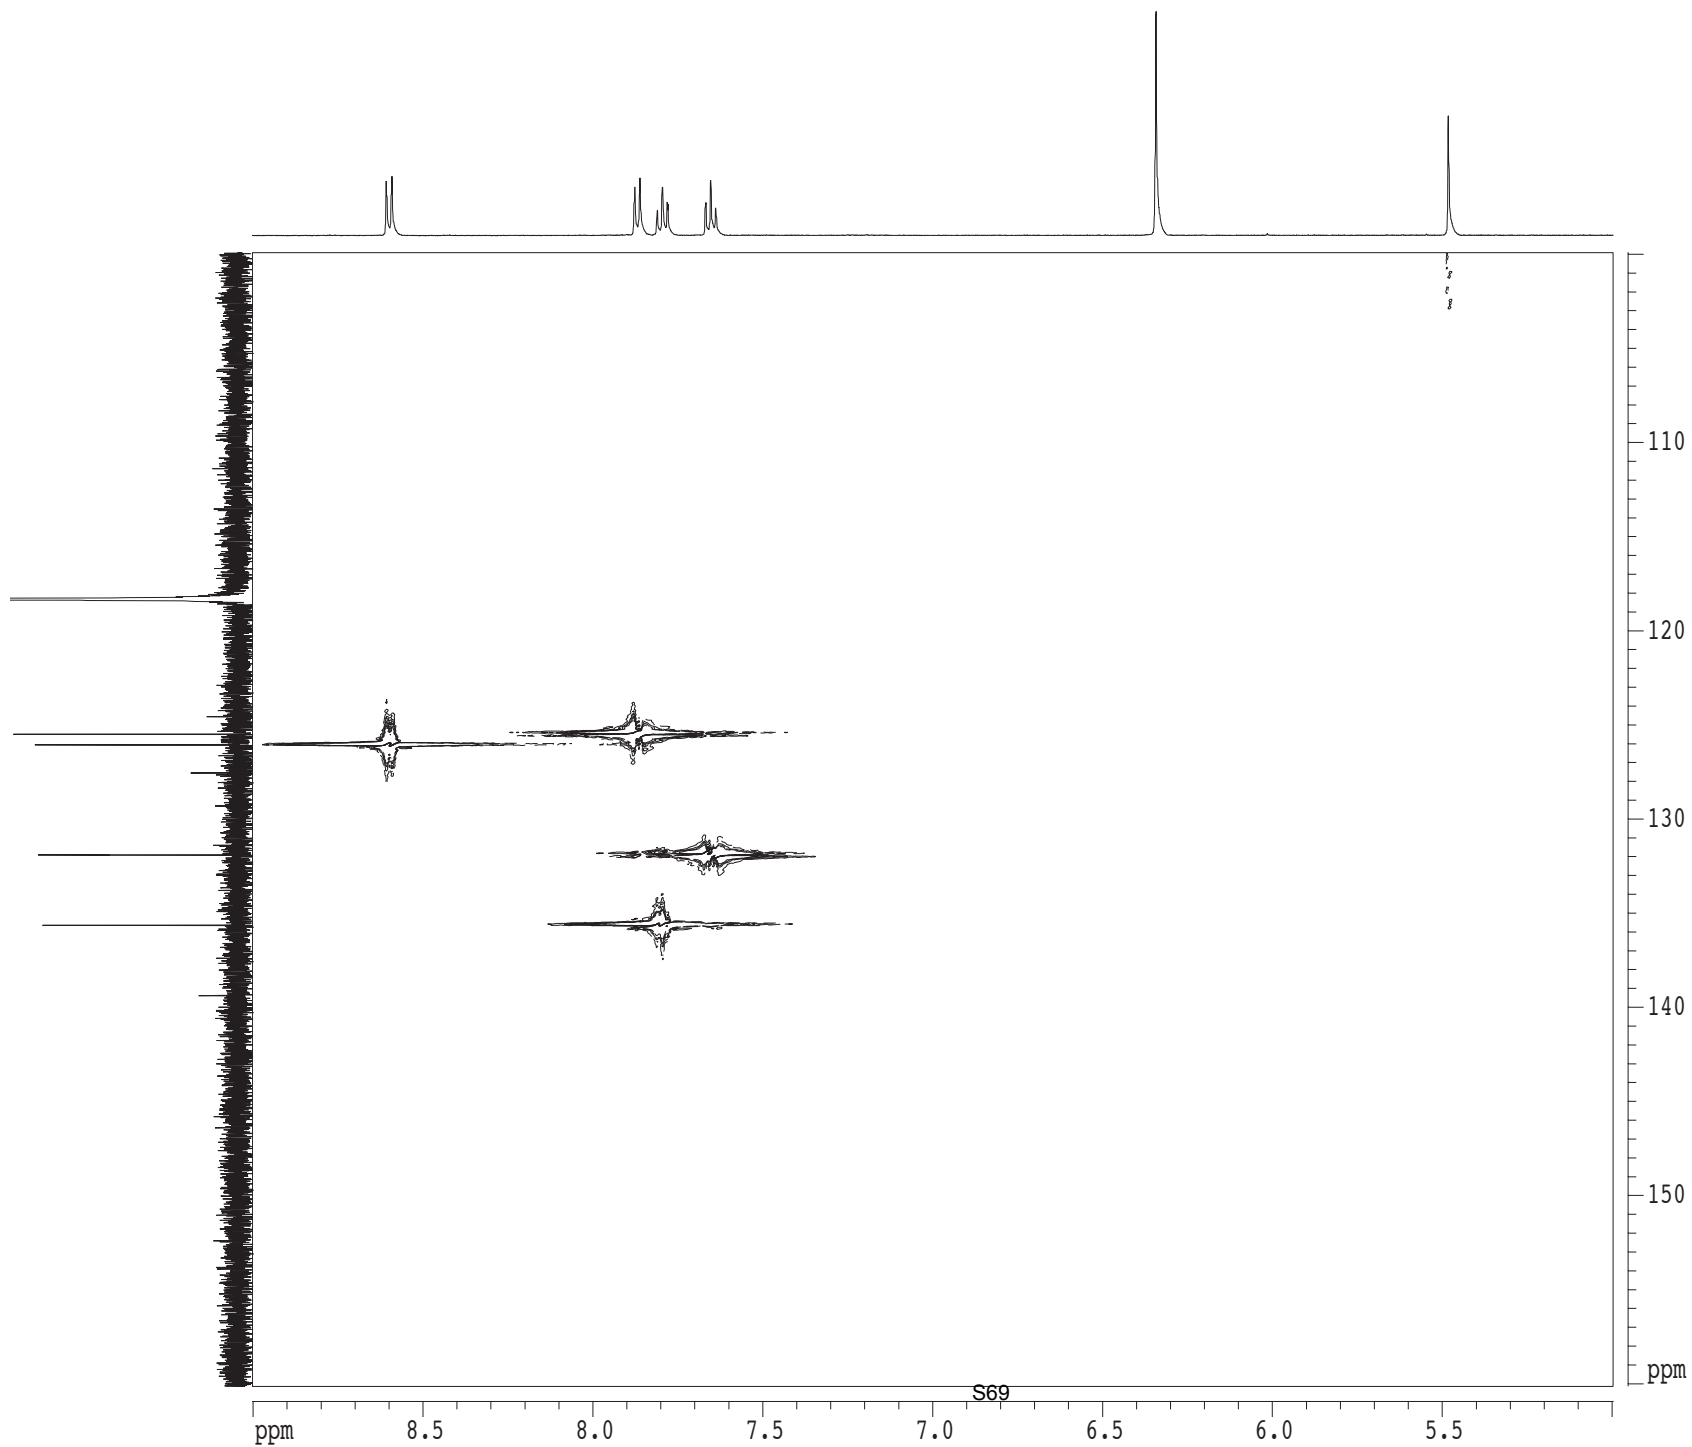

ppm

8.65804  
8.64225

5.53106  
5.52430  
5.51775  
5.51383

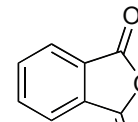

(HO)<sub>2</sub>B  
**3f**  
1D NOE Data

Integral

1.000

S70

2.987

ppm

8.5

8.0

7.5

7.0

6.5

6.0

5.5

8.350  
8.349  
8.337  
8.336  
7.874  
7.861  
7.748  
7.746  
7.735  
7.734  
7.723  
7.721  
7.636  
7.632  
7.629  
7.621  
7.618  
7.531  
7.531  
7.530  
7.518  
7.506  
7.505  
7.415  
7.411  
7.407  
7.400  
7.396

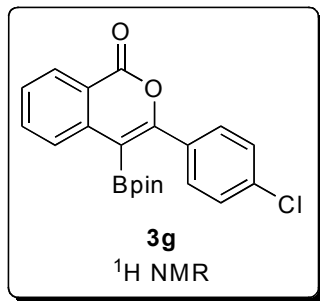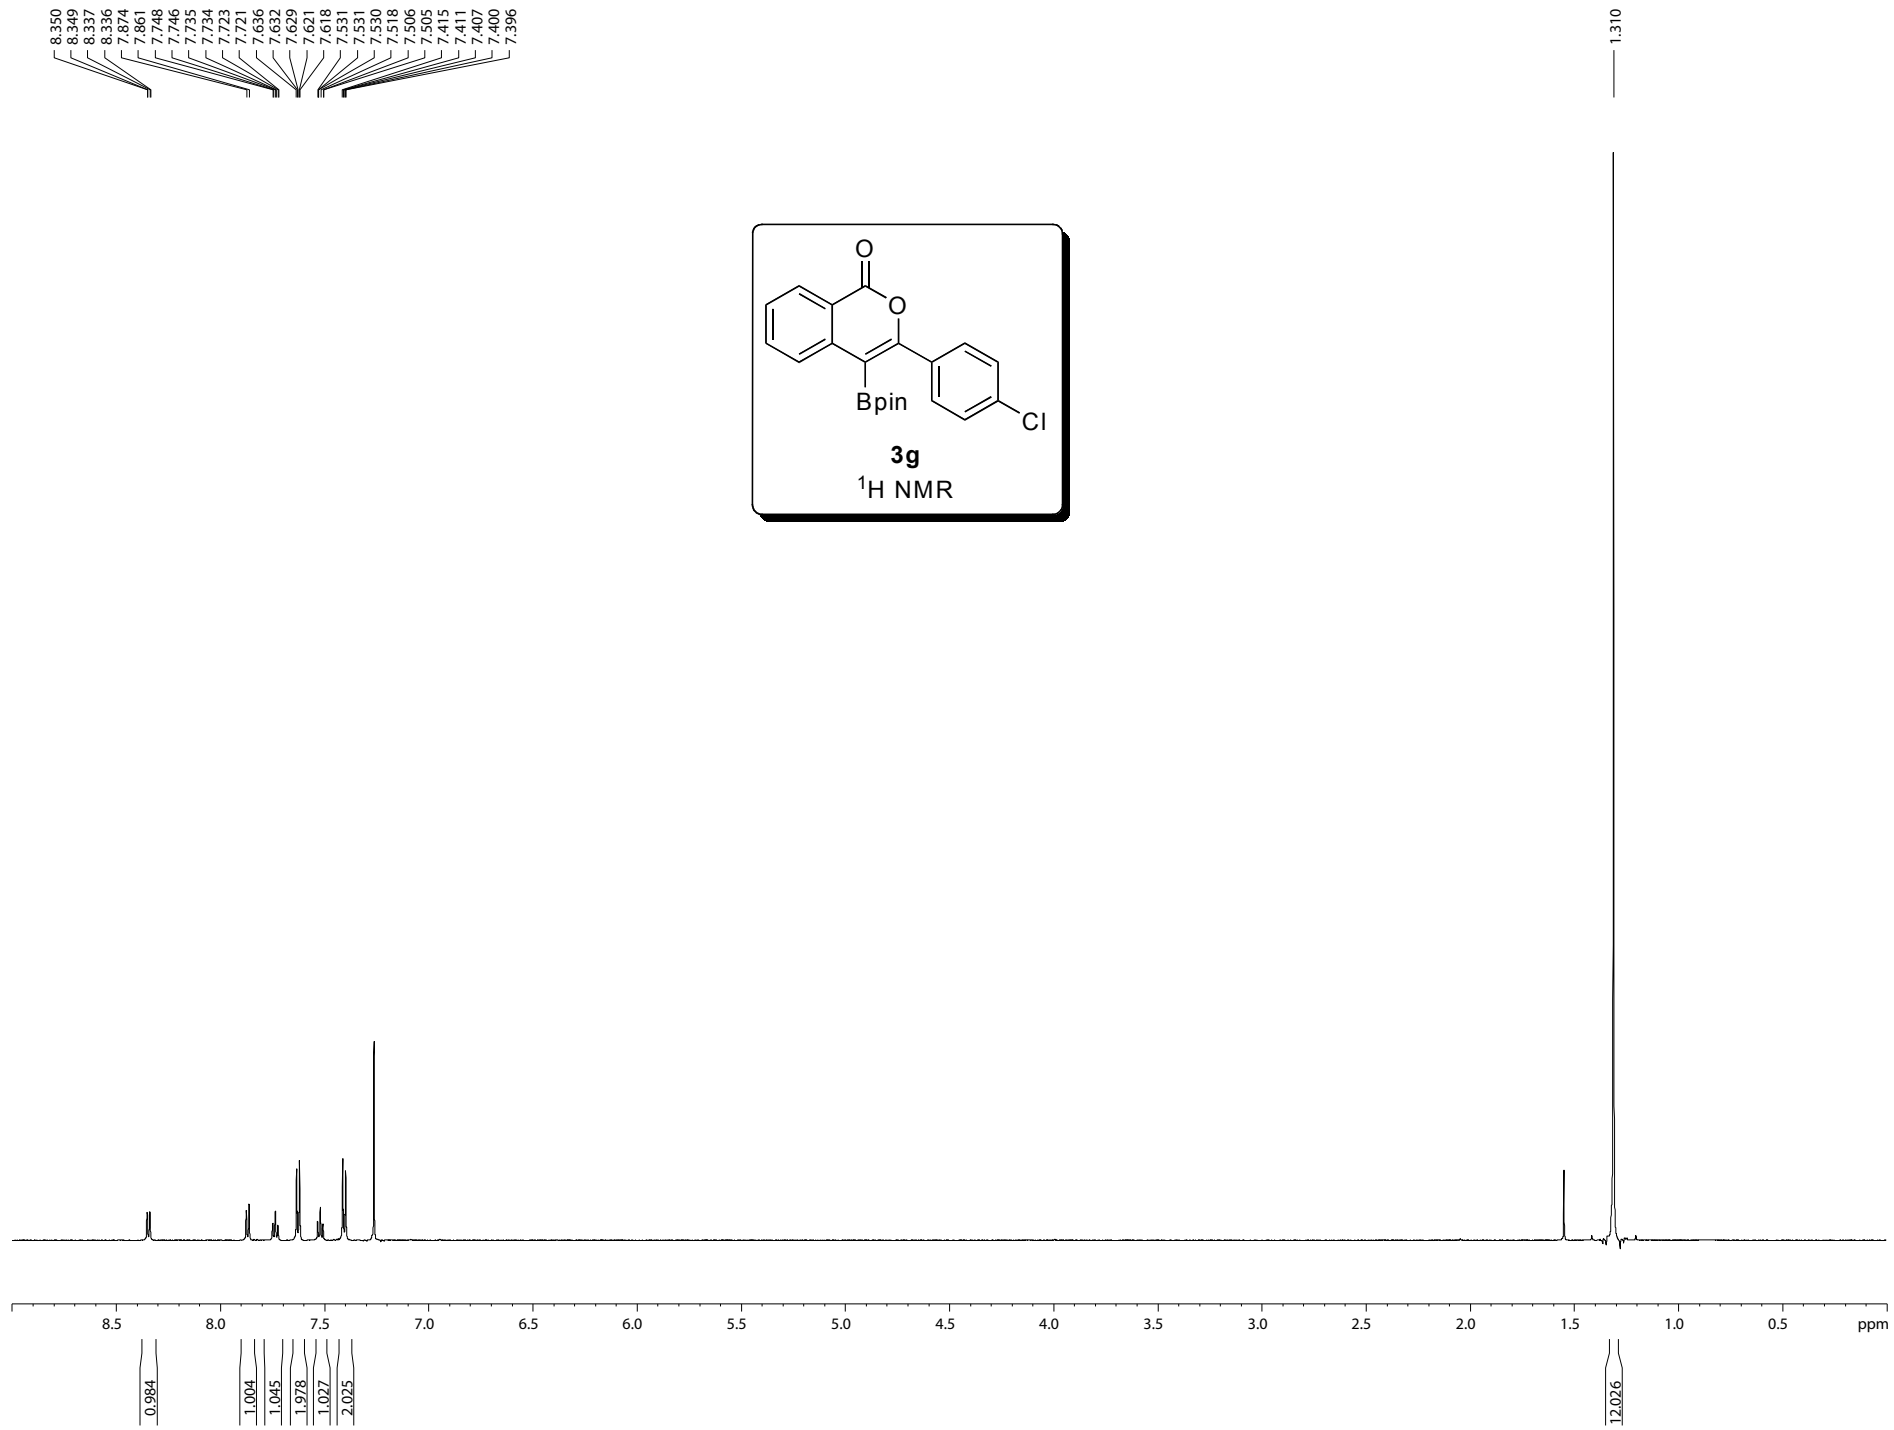

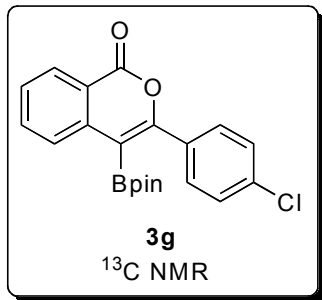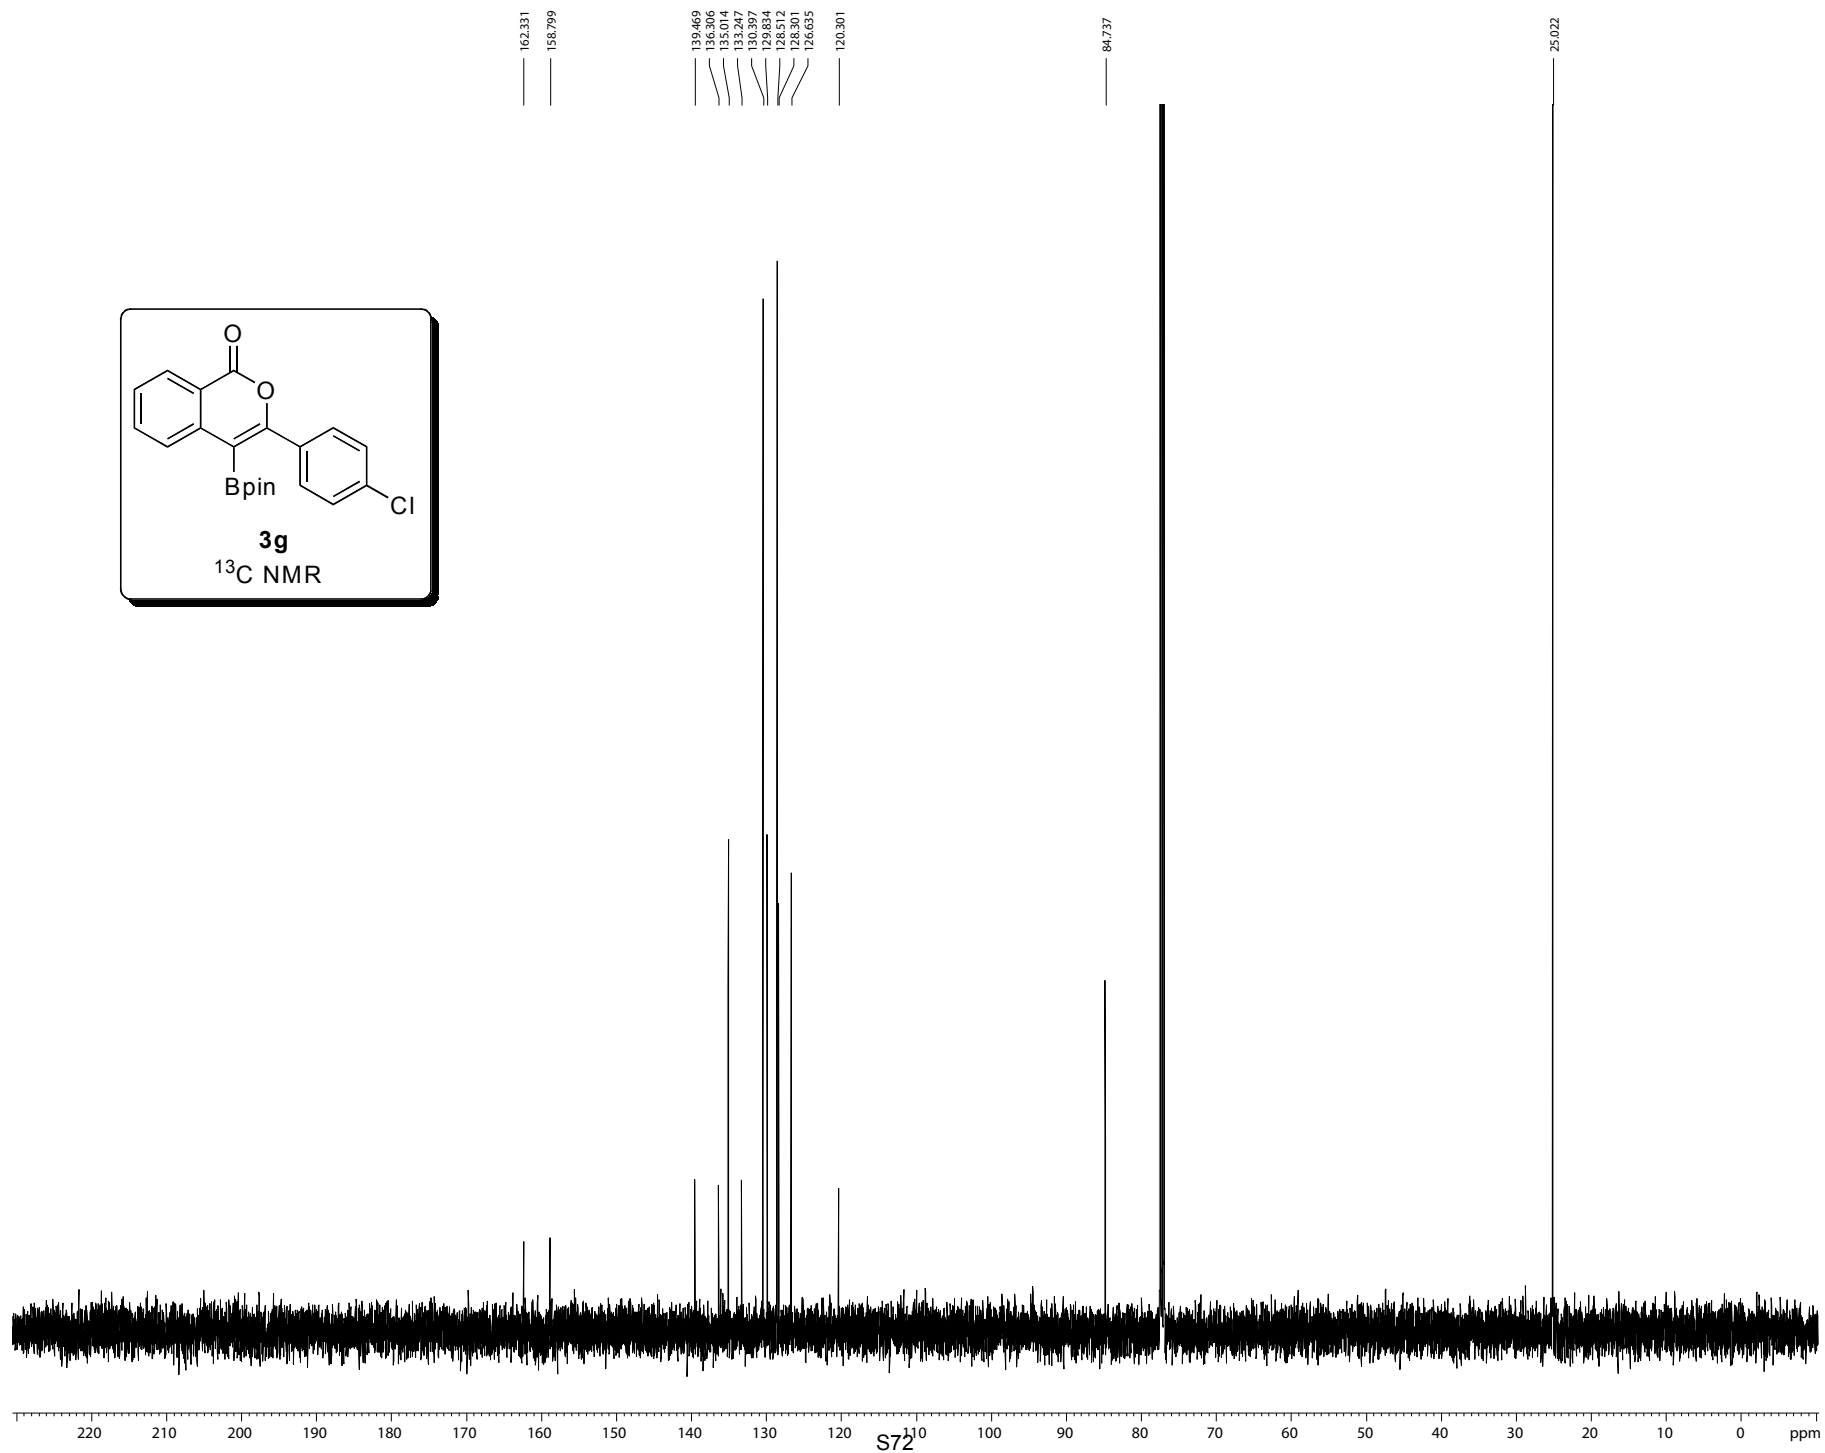



31419

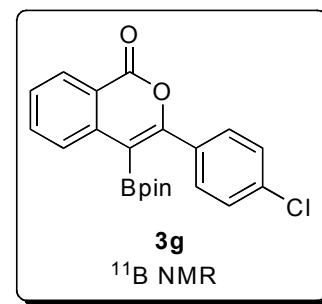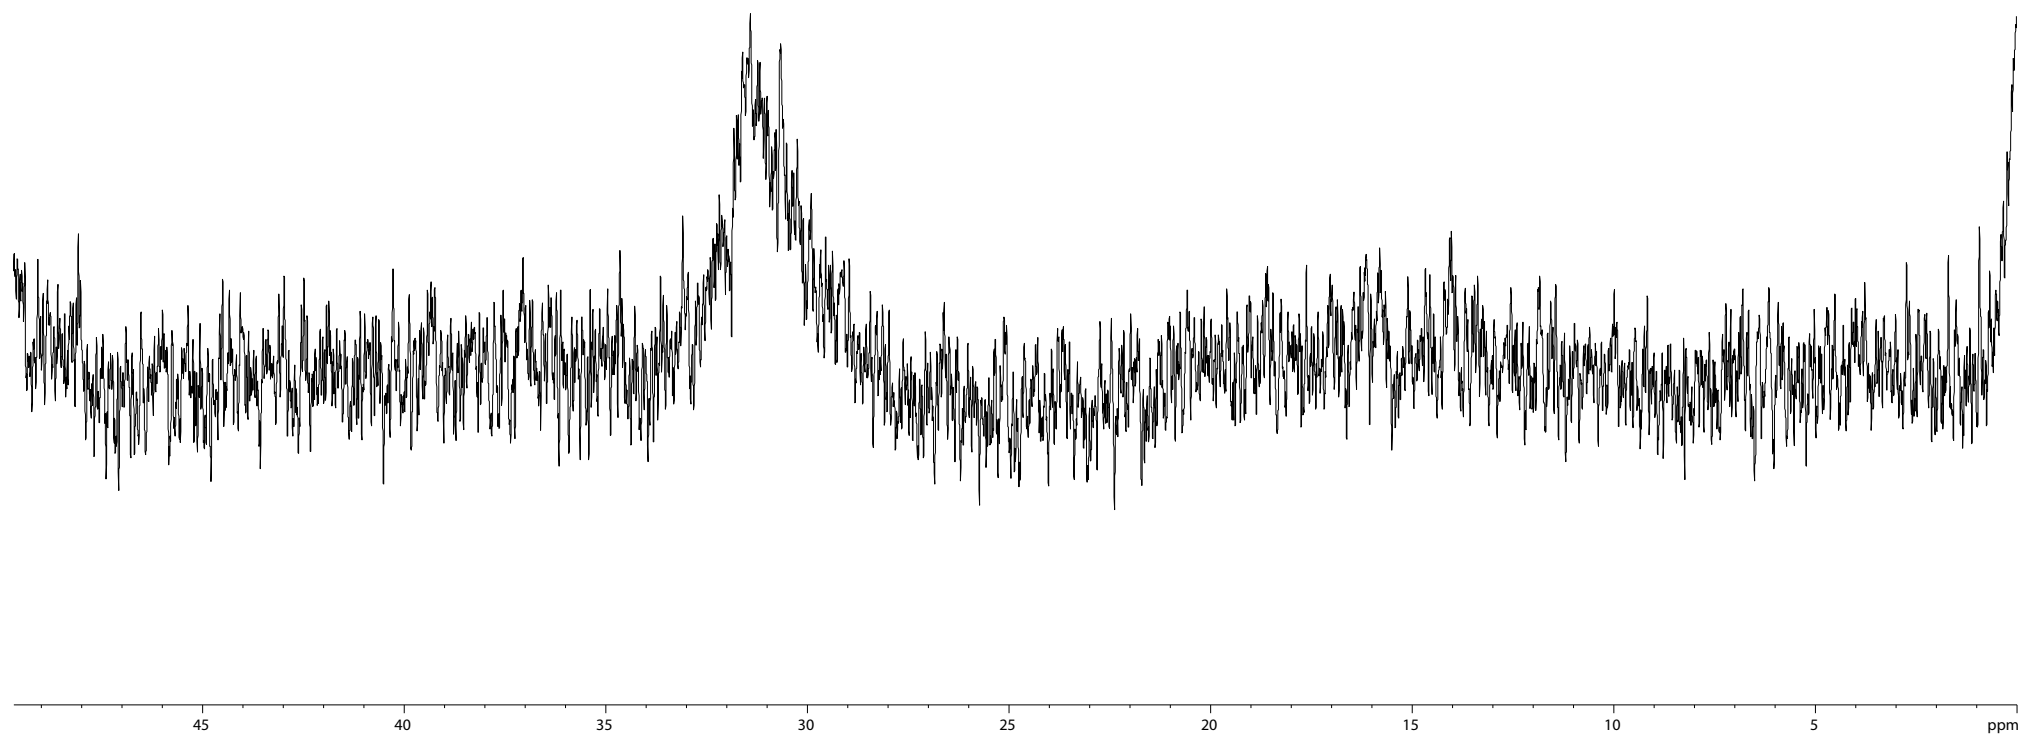

8.370  
8.366  
8.188  
8.173

7.791  
7.788  
7.777  
7.773

3.270  
3.258  
3.245

2.776  
2.764  
2.751

1.397

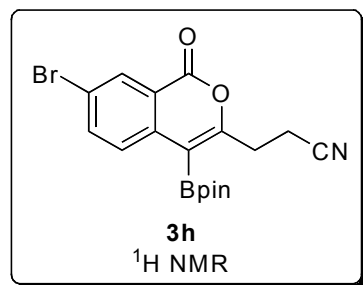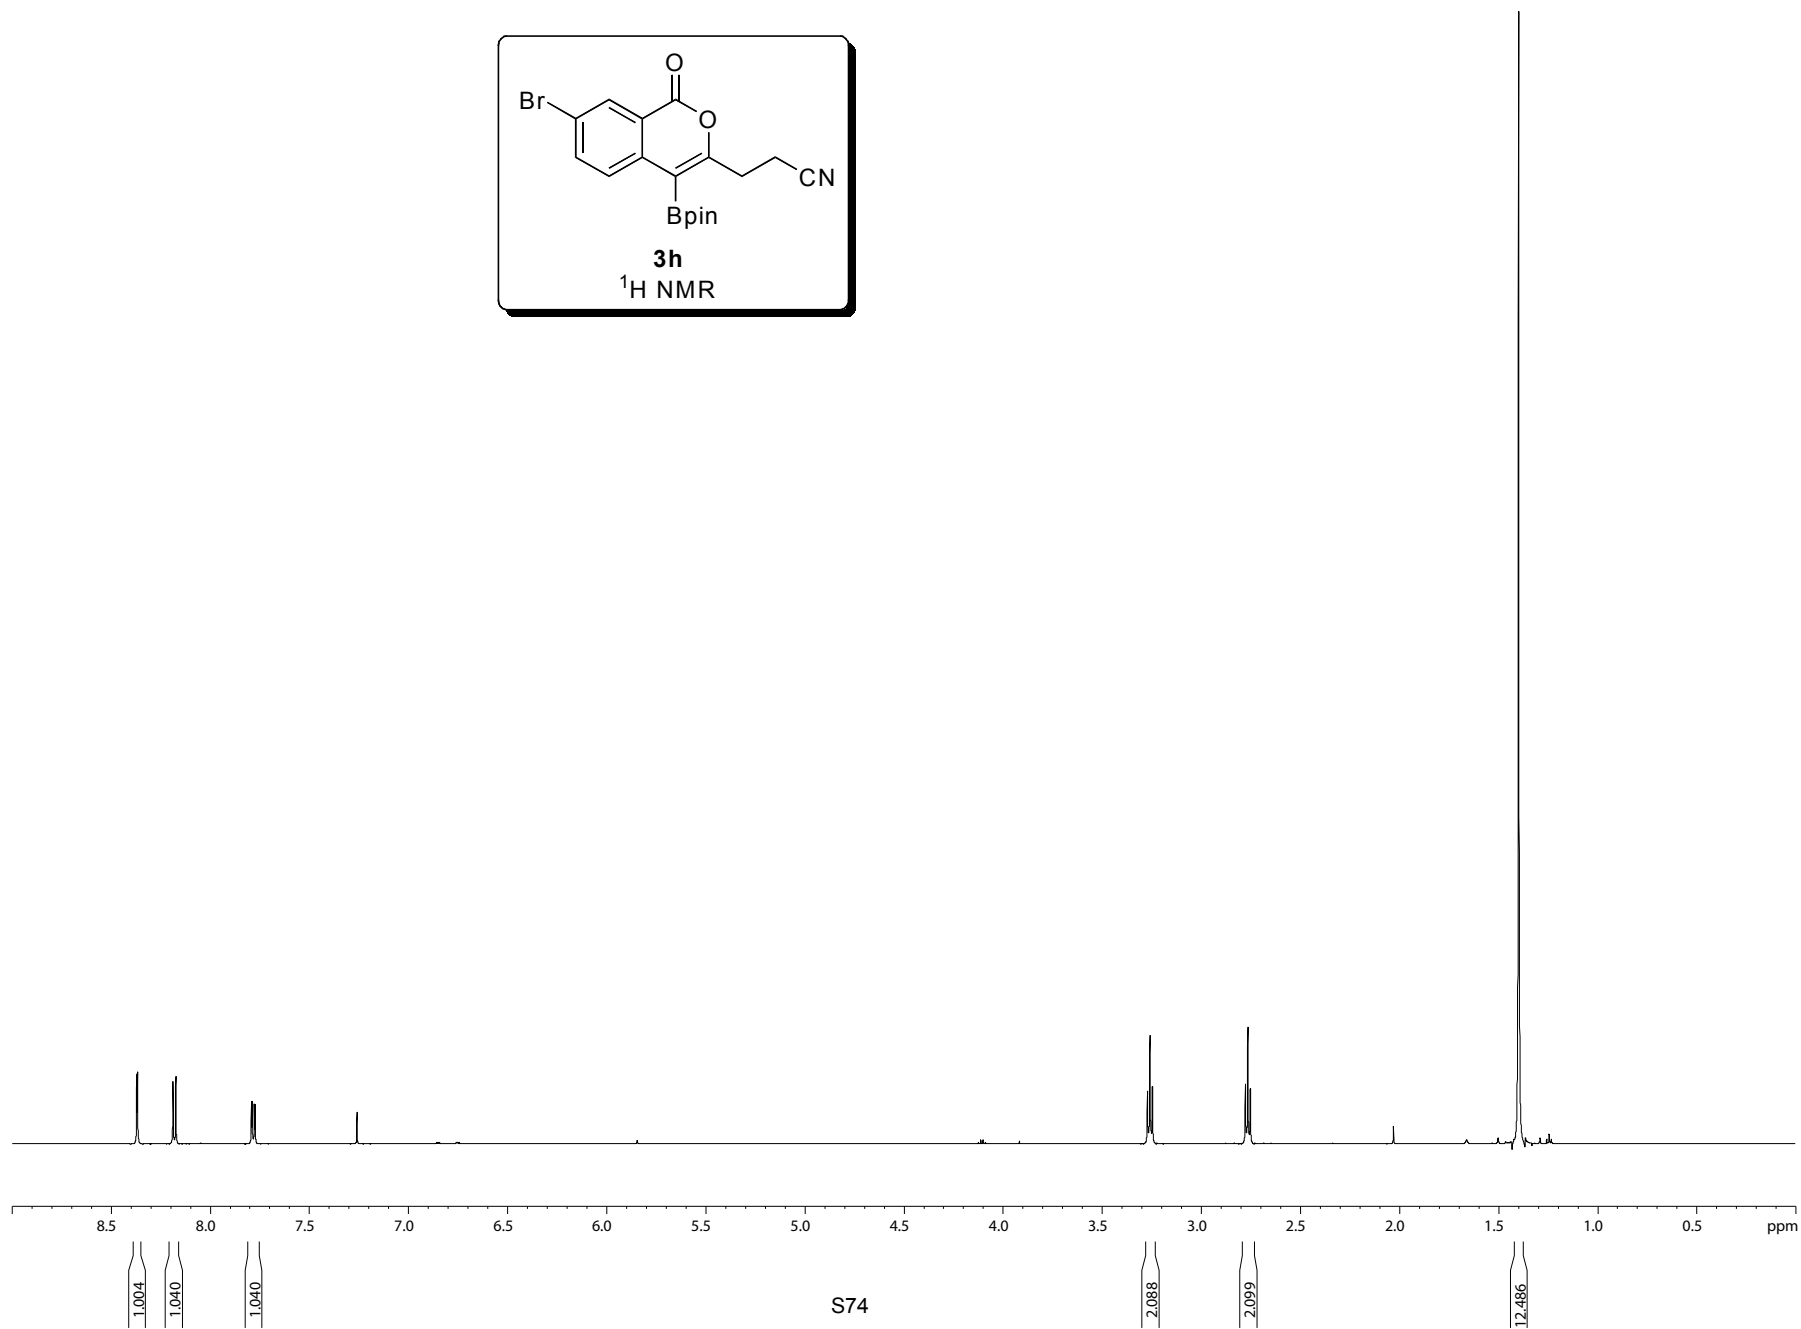

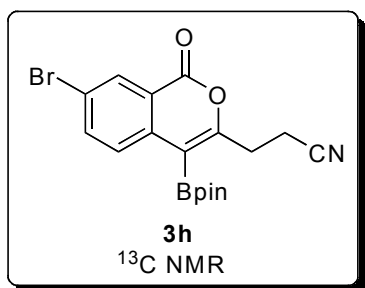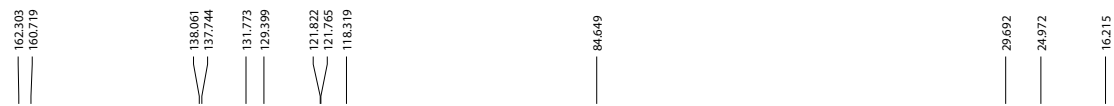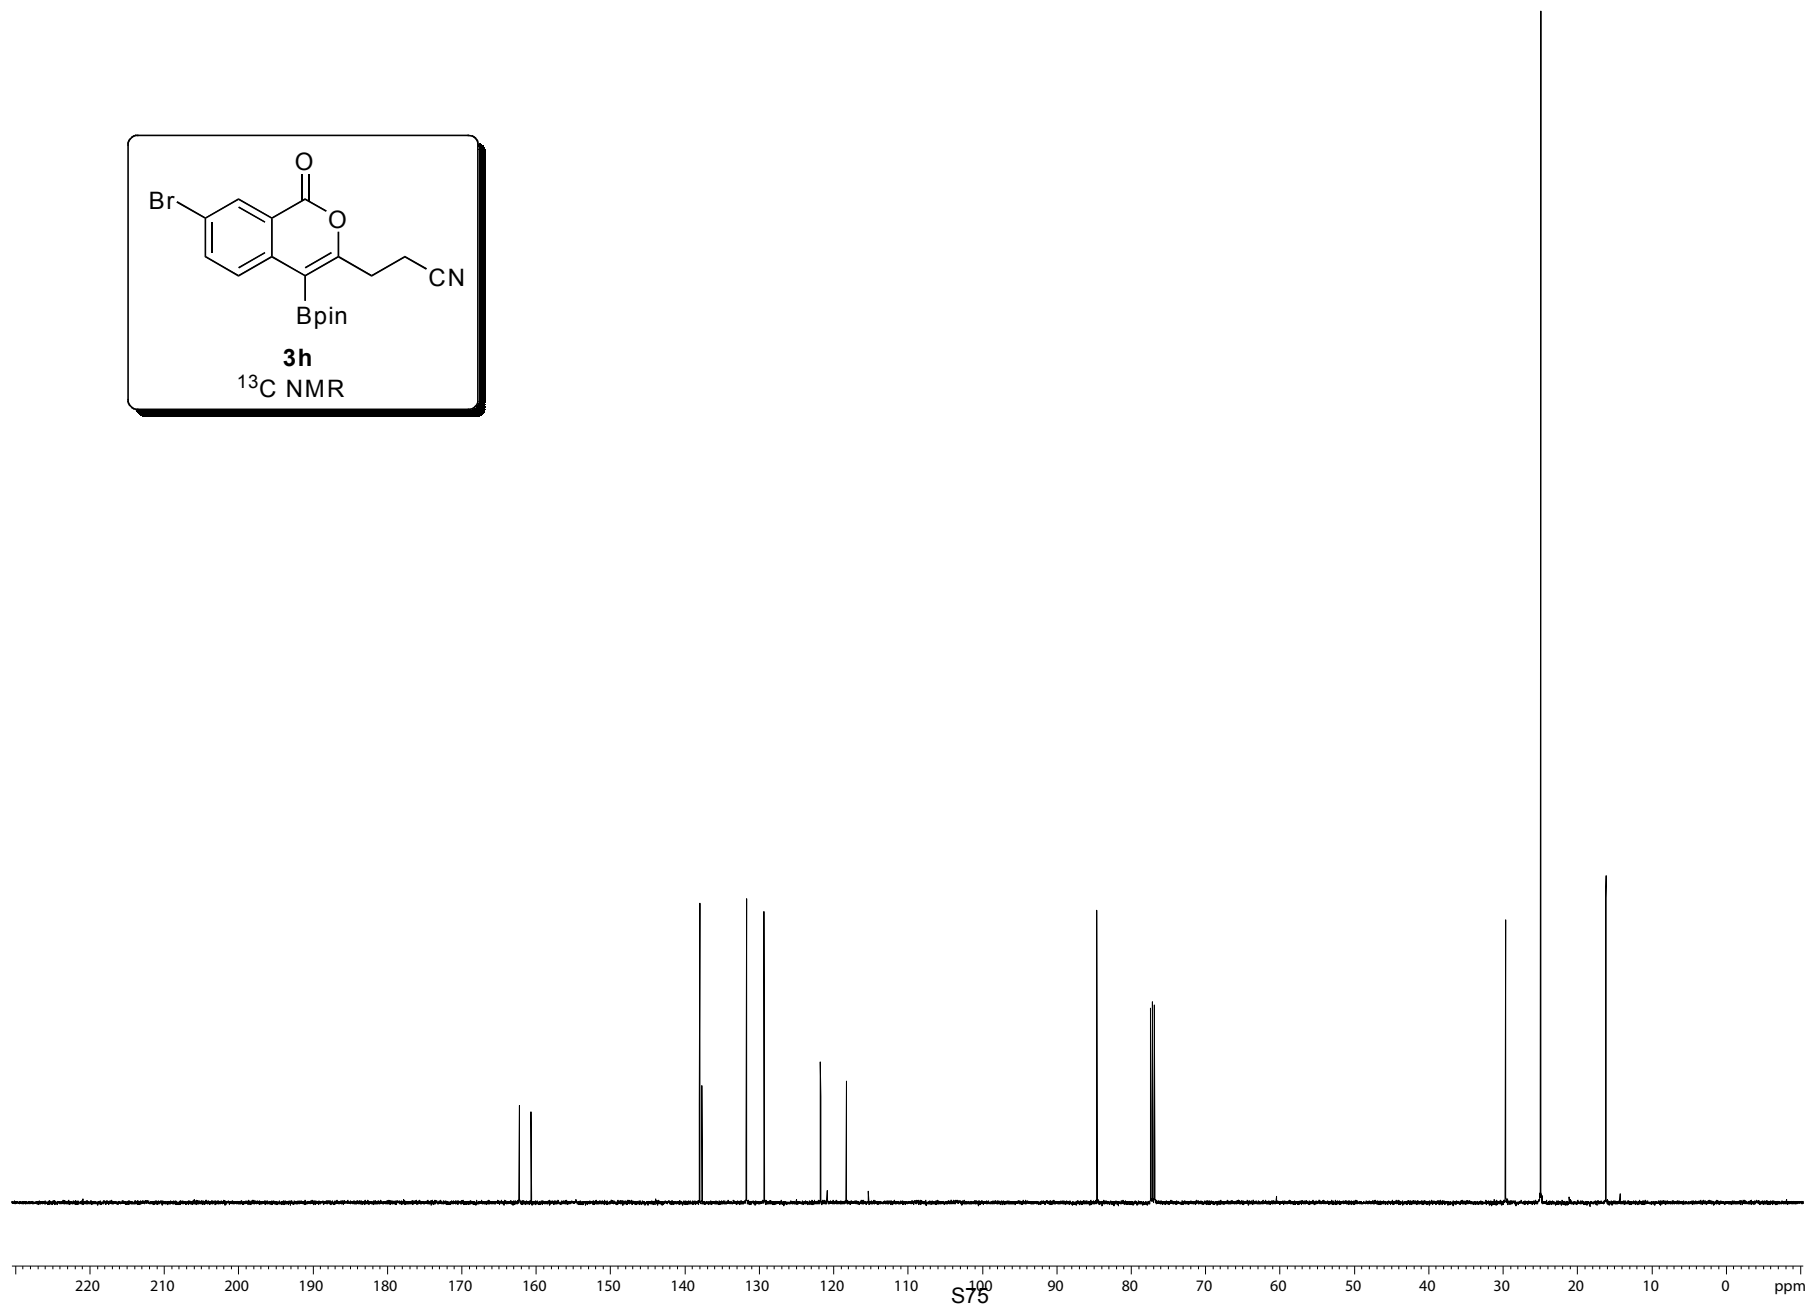

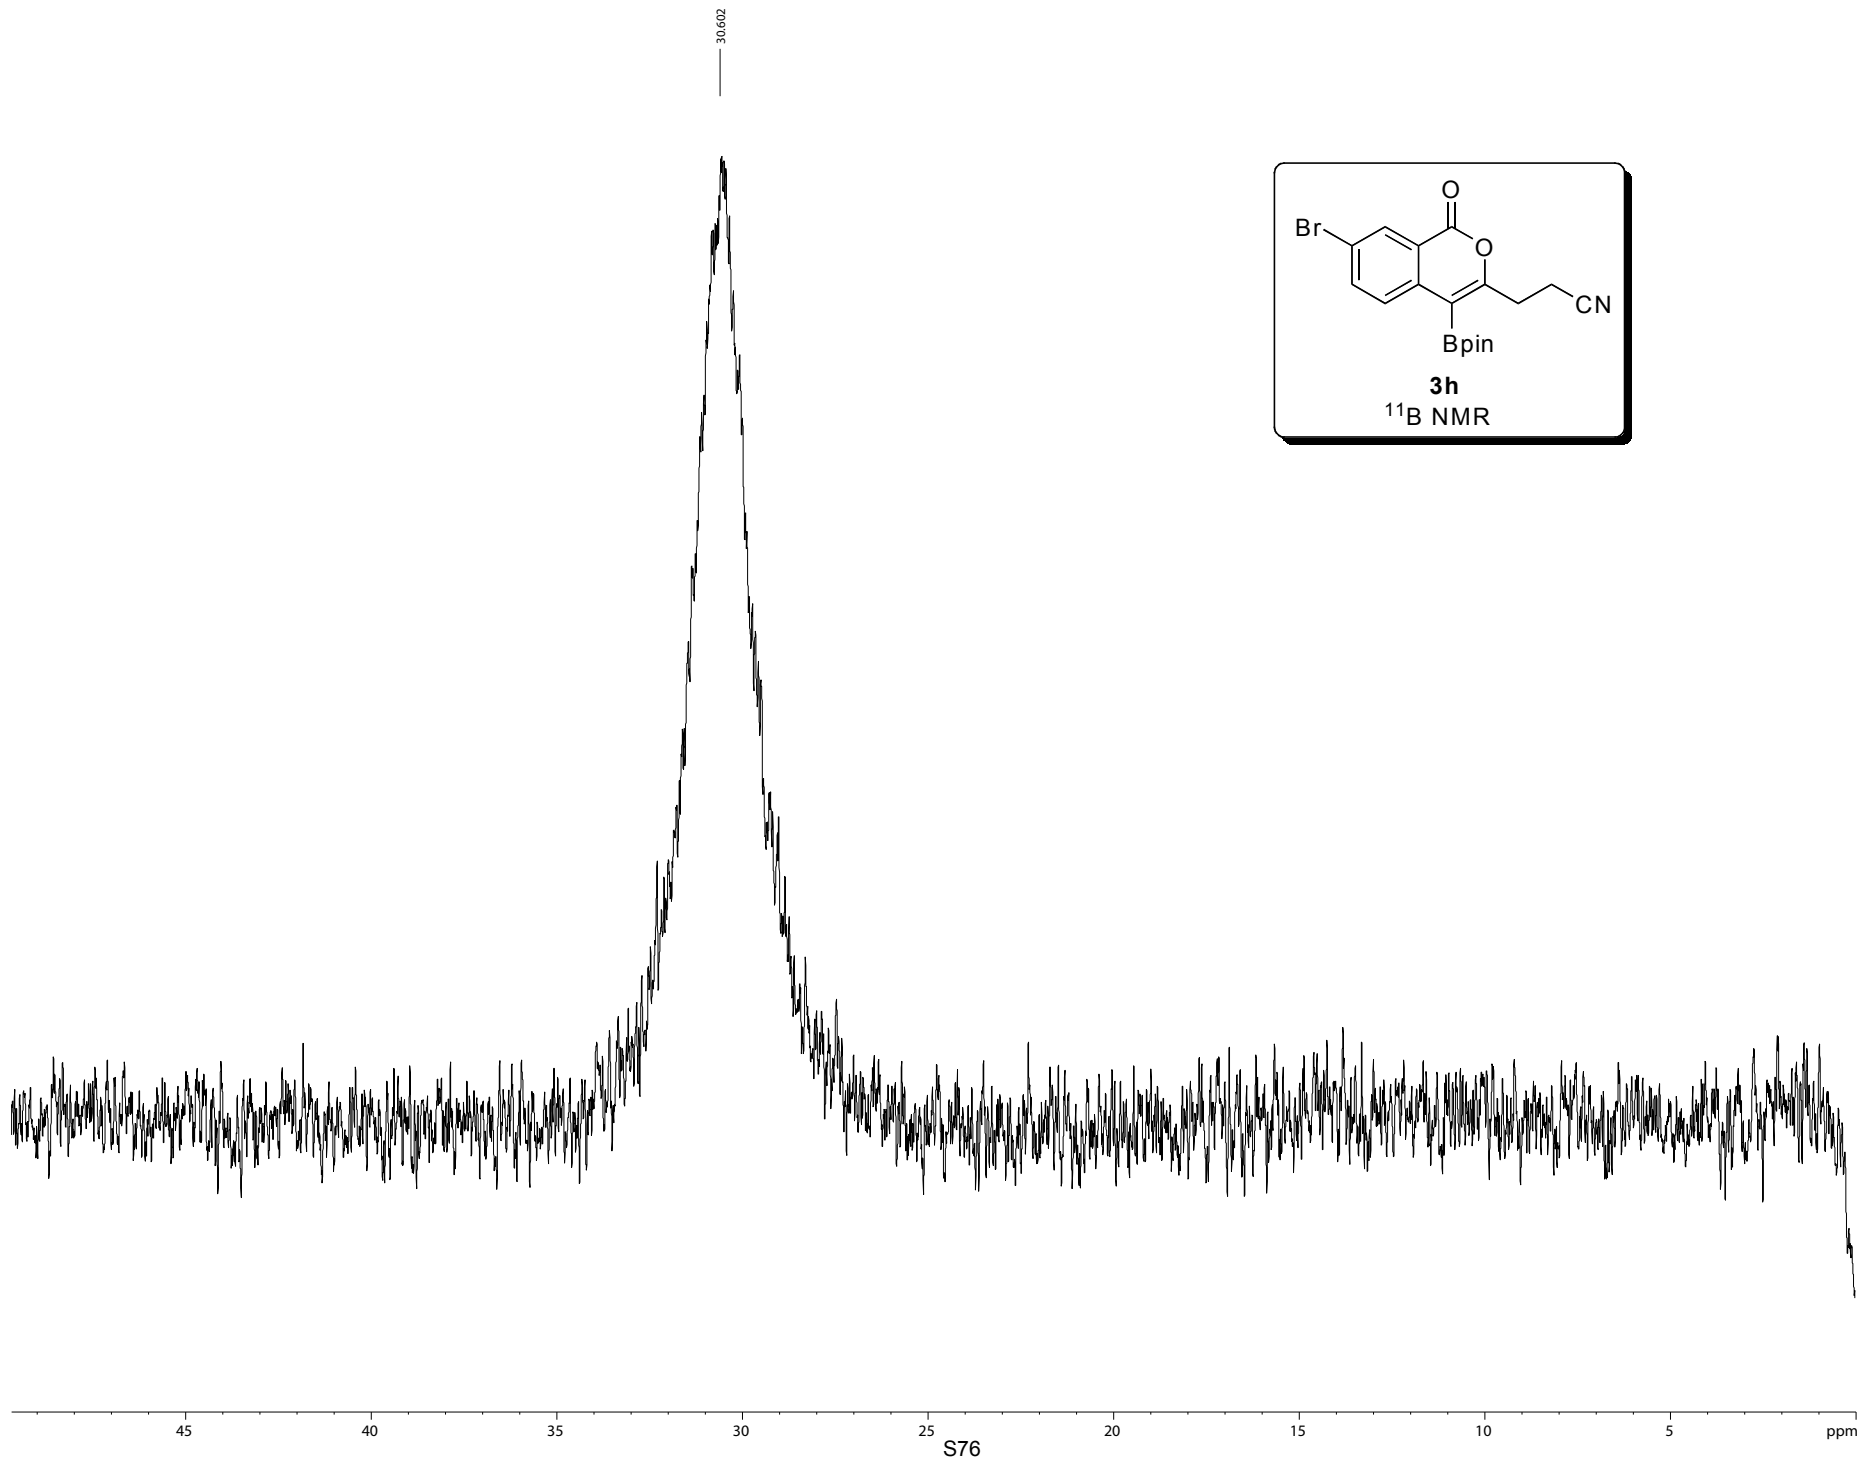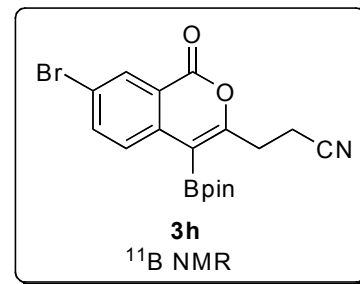

8.314  
8.300  
7.777  
7.775  
7.772  
7.770  
7.746  
7.733  
7.733  
7.706  
7.703  
7.694  
7.692  
7.680  
7.678  
7.477  
7.475  
7.465  
7.464  
7.452  
7.450  
7.434  
7.432  
7.426  
7.424  
7.345  
7.343  
7.340  
7.338  
7.335  
7.332  
7.330

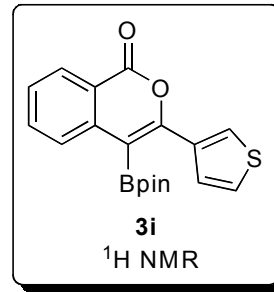

1.342  
1.340

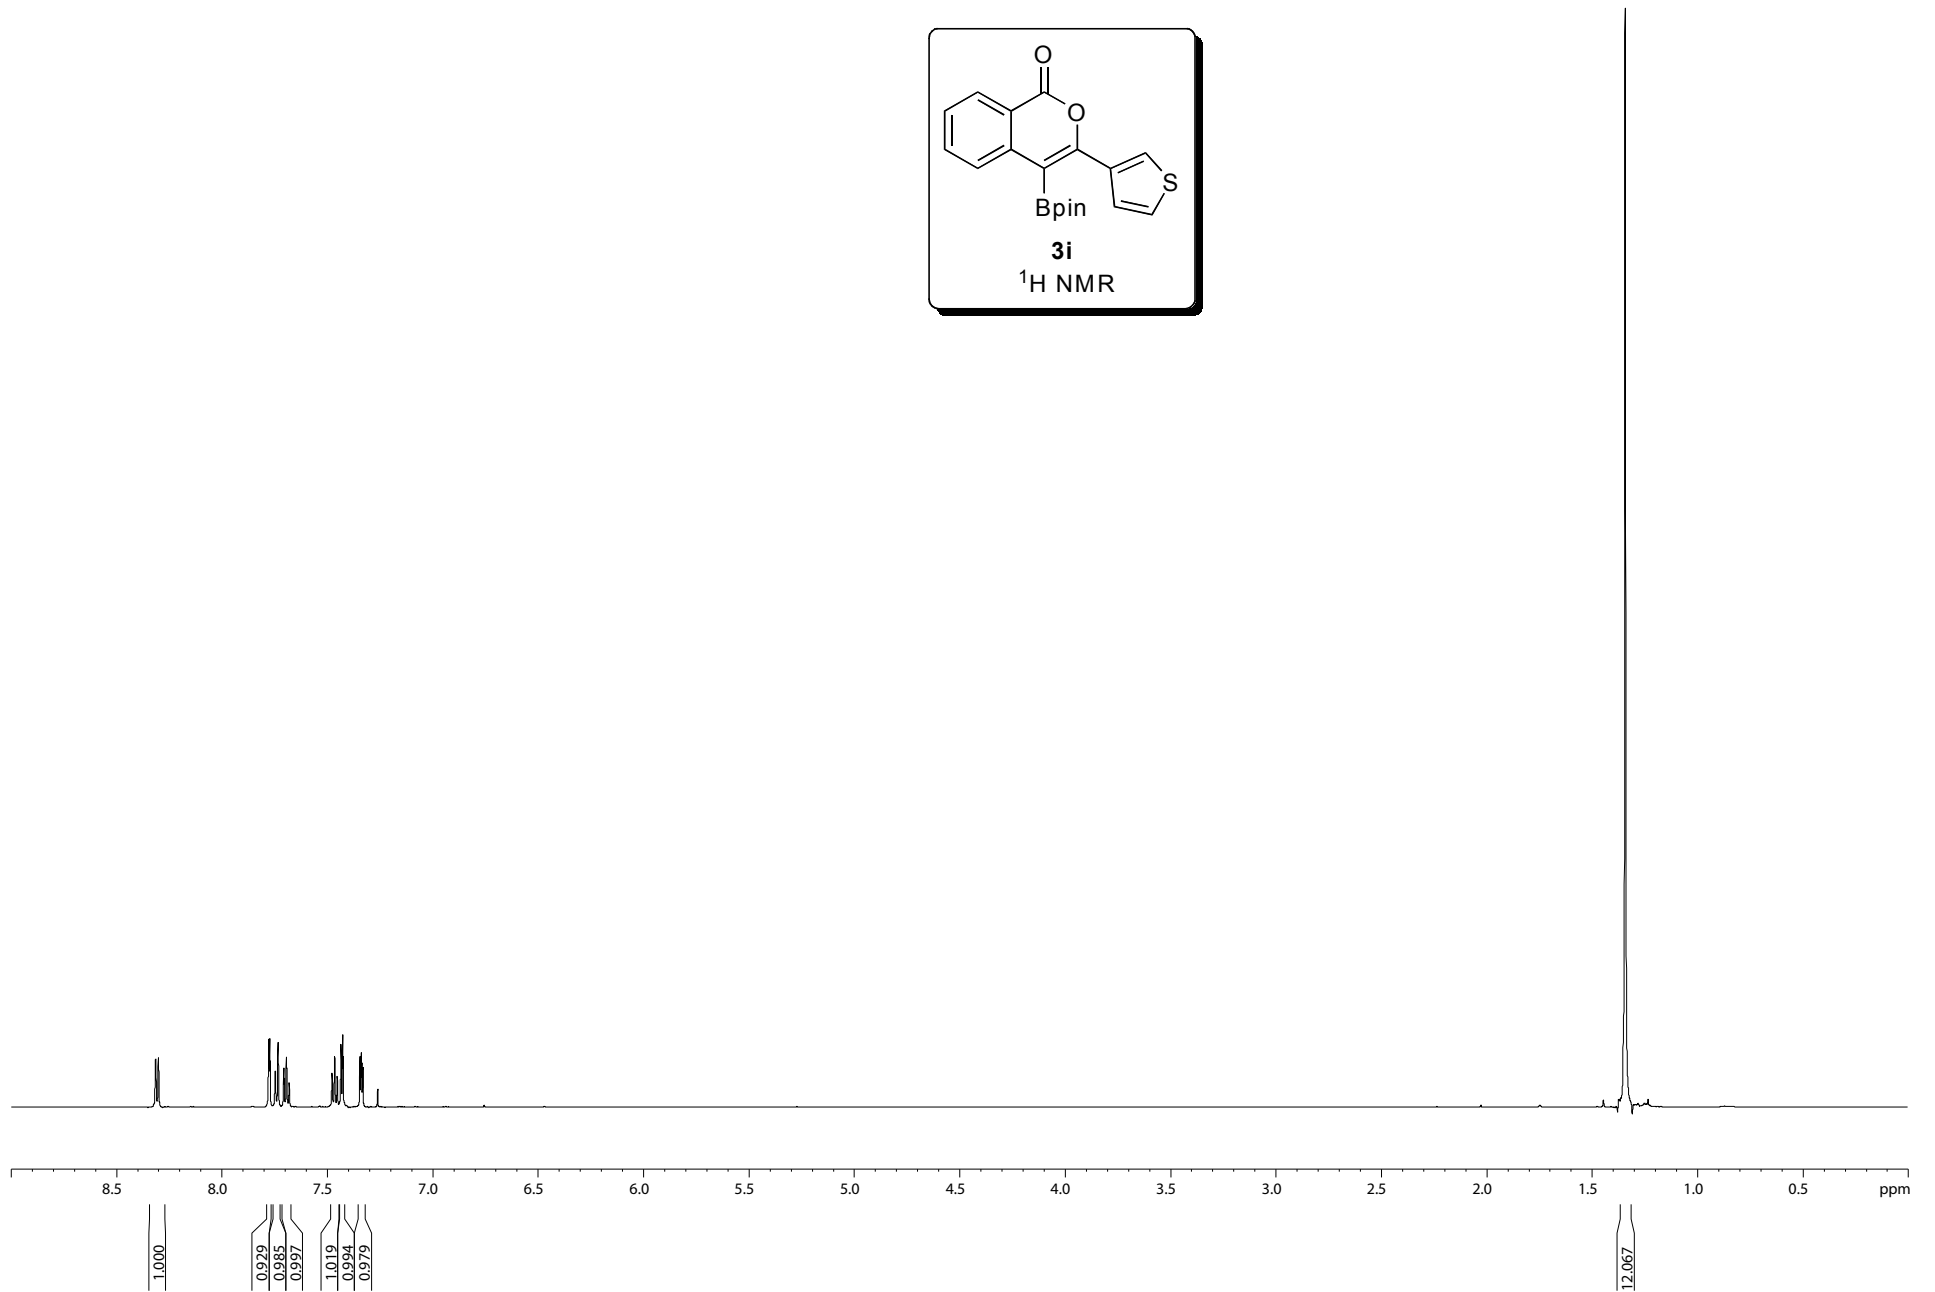

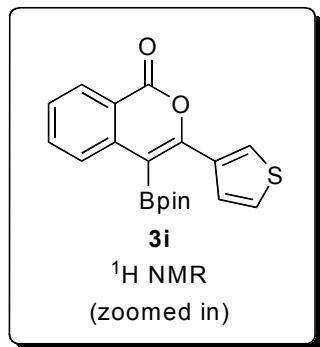

8.314  
8.300

7.777  
7.775  
7.772  
7.770  
7.746  
7.746  
7.733  
7.733  
7.706  
7.703  
7.694  
7.692  
7.680  
7.678

7.477  
7.475  
7.465  
7.464  
7.452  
7.450  
7.434  
7.432  
7.426  
7.424  
7.345  
7.343  
7.340  
7.338  
7.335  
7.332  
7.330

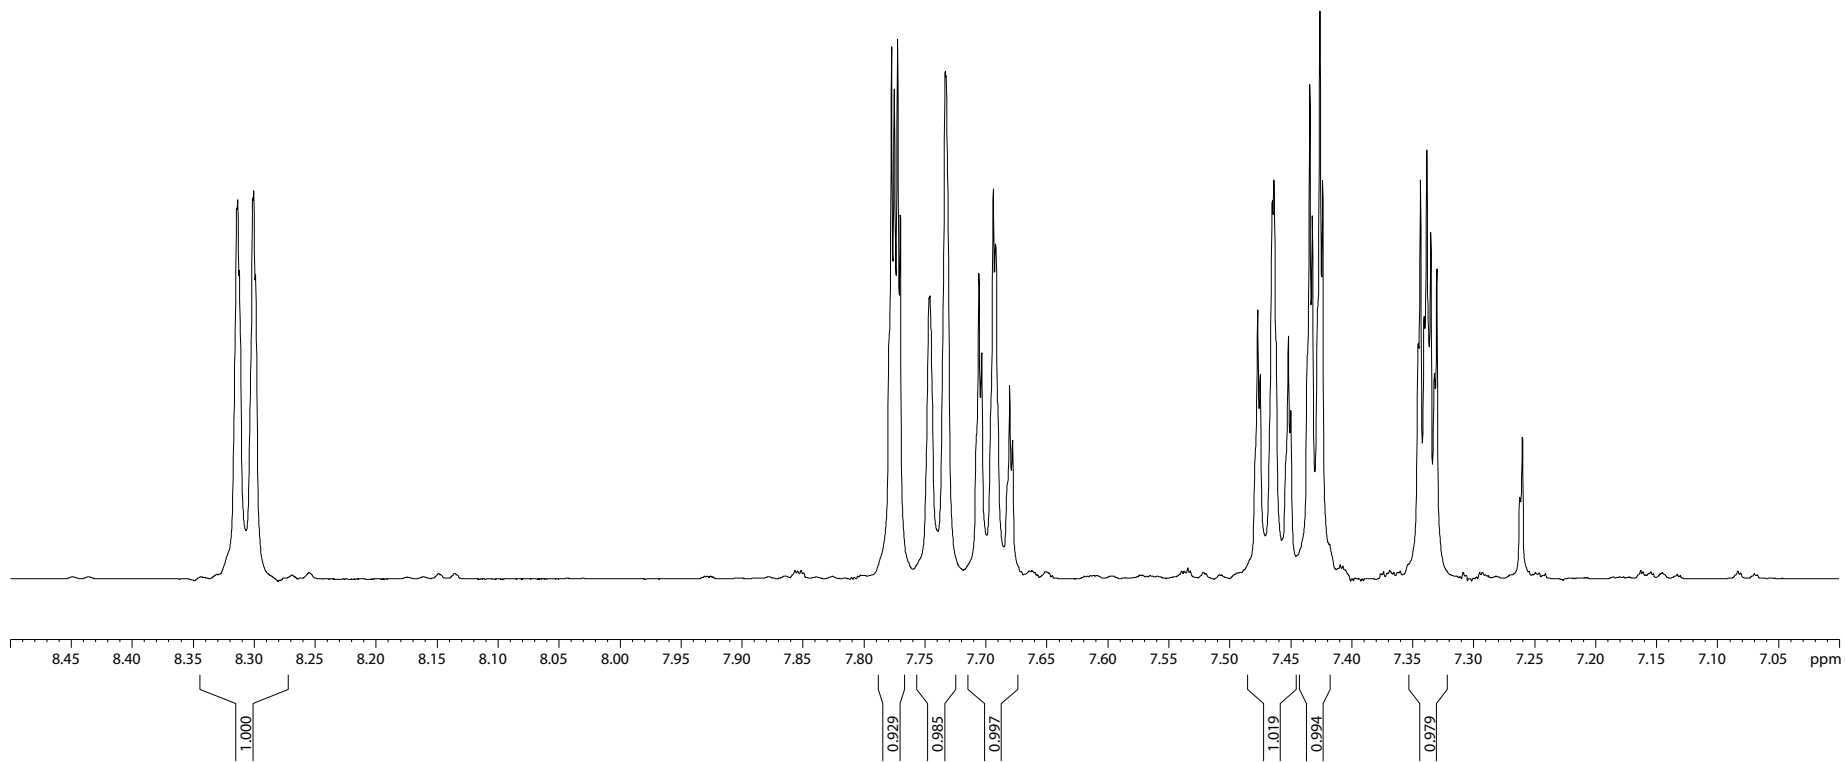

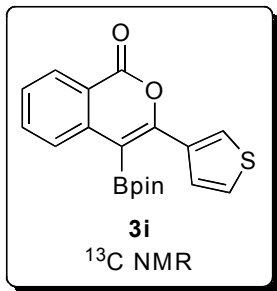

162.309  
154.542  
139.620  
135.891  
134.837  
129.684  
127.900  
127.713  
127.183  
126.372  
125.759  
120.235

84.699

25.082

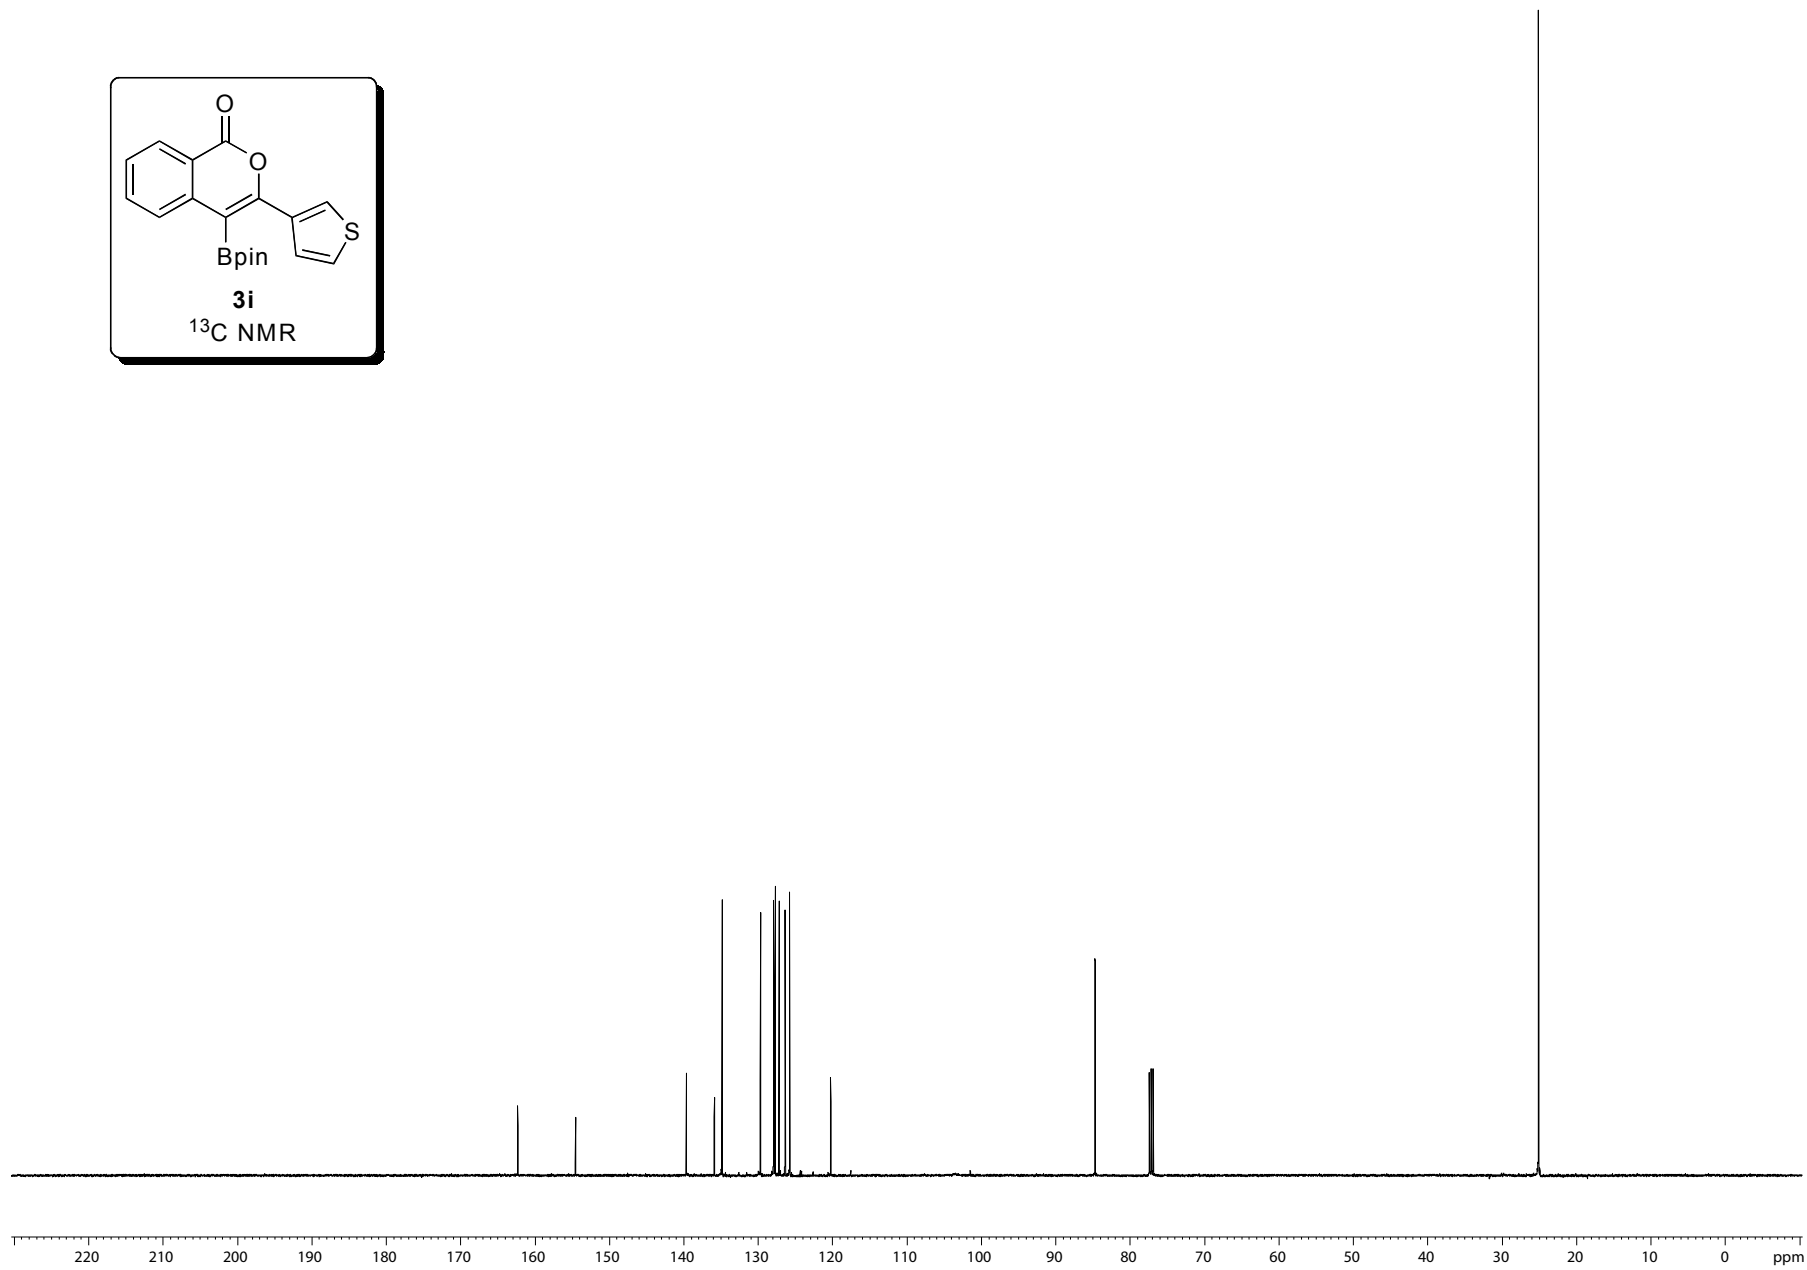

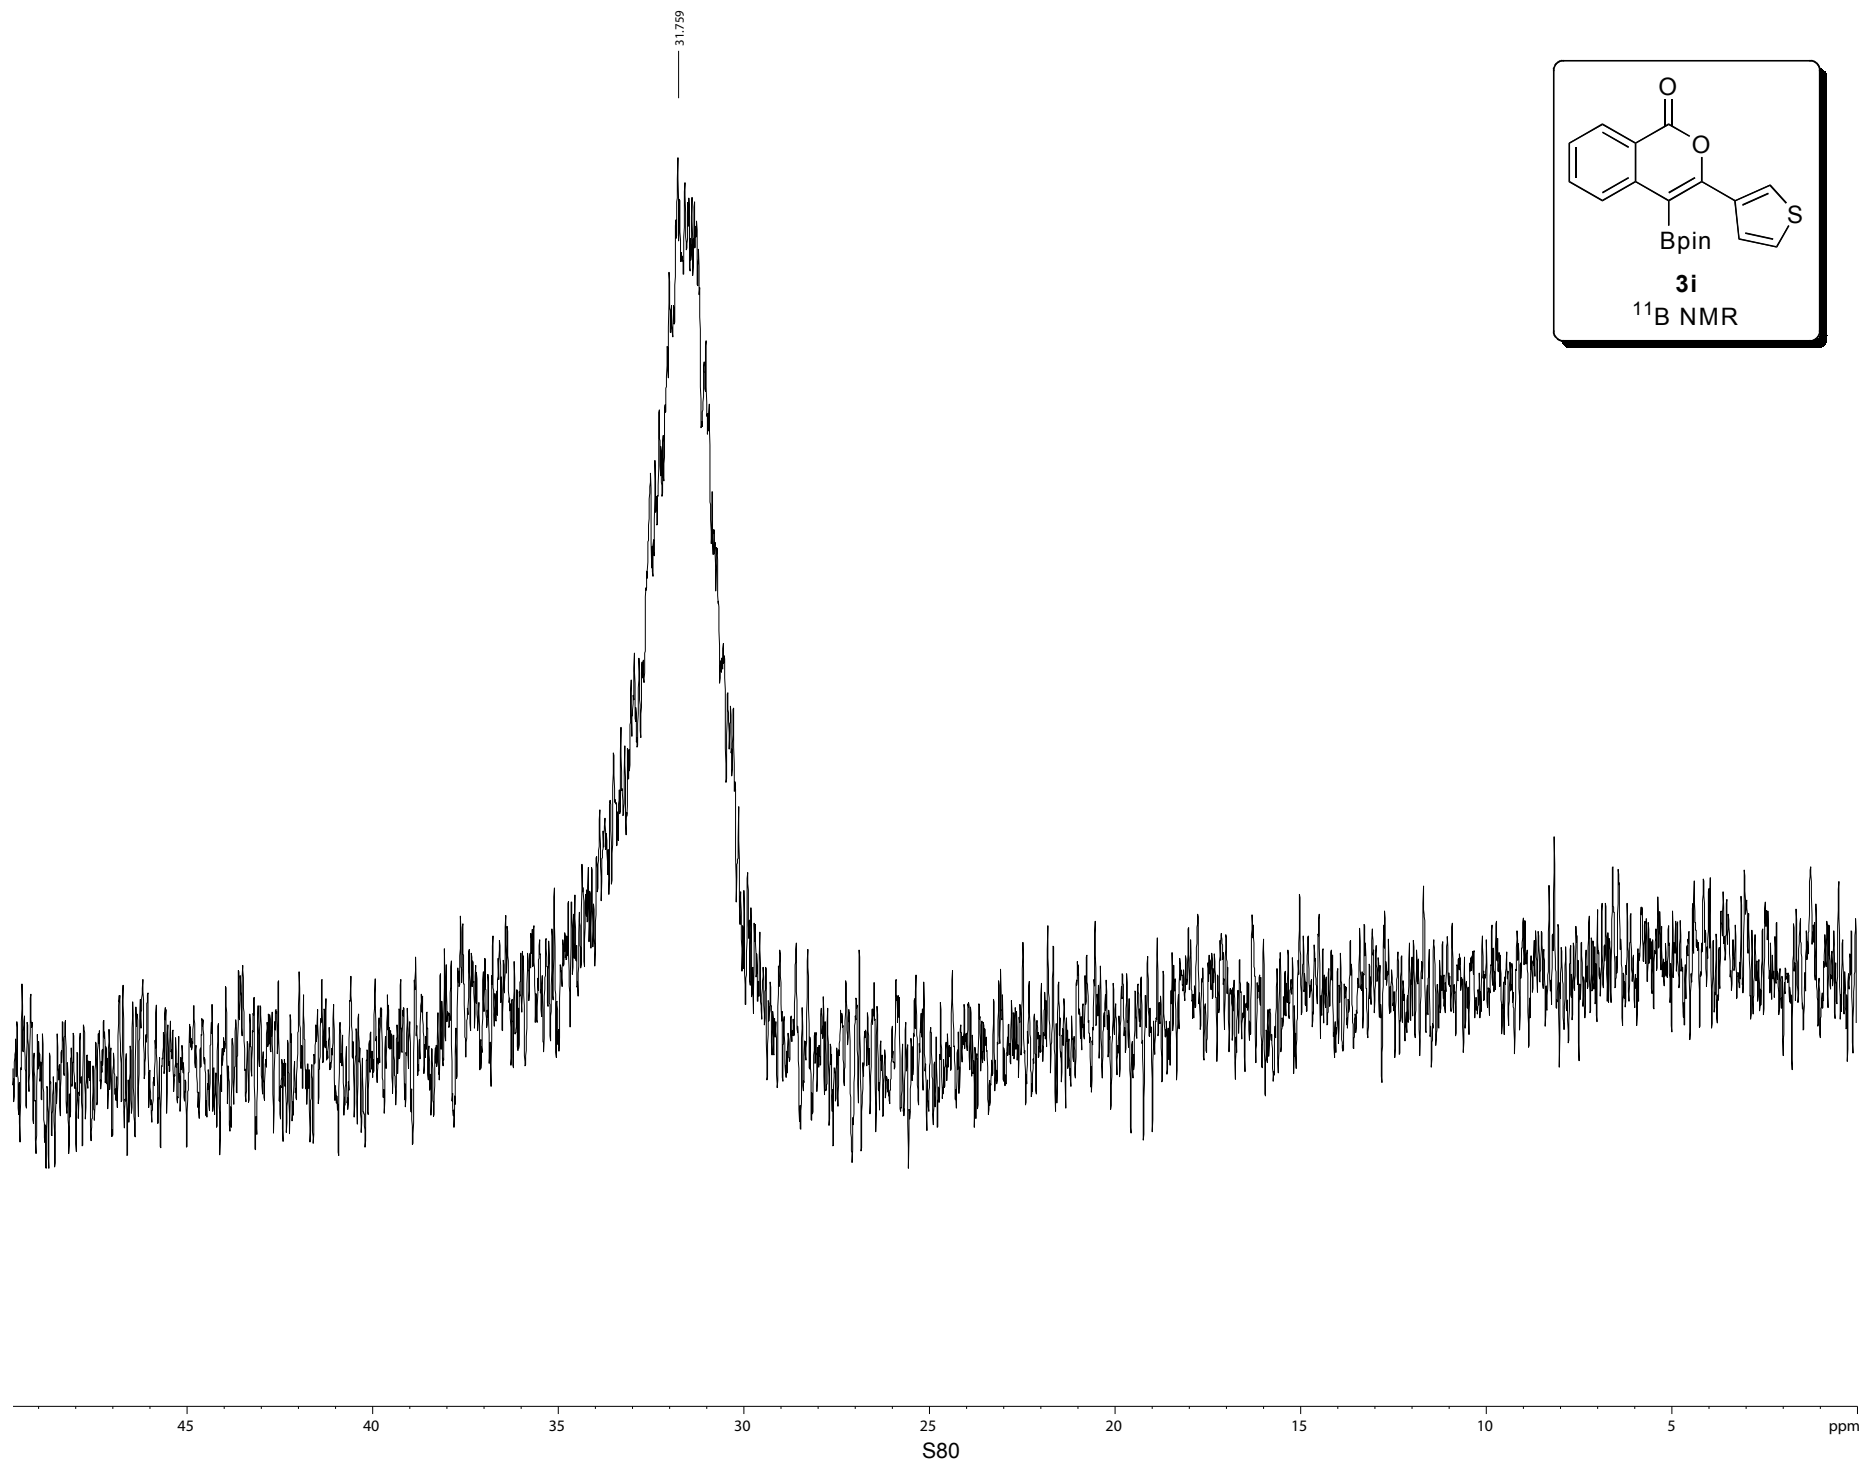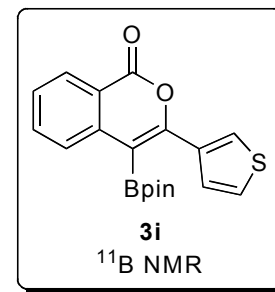



8.255  
8.253  
8.242  
8.241  
8.240  
7.725  
7.712  
7.655  
7.653  
7.643  
7.641  
7.630  
7.628  
7.421  
7.419  
7.407  
7.395  
7.394

6.061  
6.058  
6.055  
6.052  
6.049

2.411  
2.408  
2.402  
2.398  
2.388  
2.143  
2.137  
2.133  
2.127  
2.123  
1.735  
1.725  
1.720  
1.716  
1.710  
1.706  
1.700  
1.696  
1.652  
1.648  
1.642  
1.638  
1.632  
1.628  
1.623  
1.613  
1.348

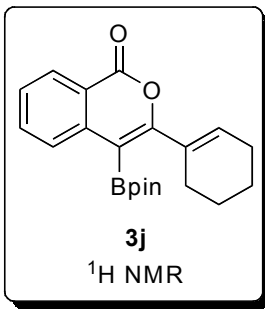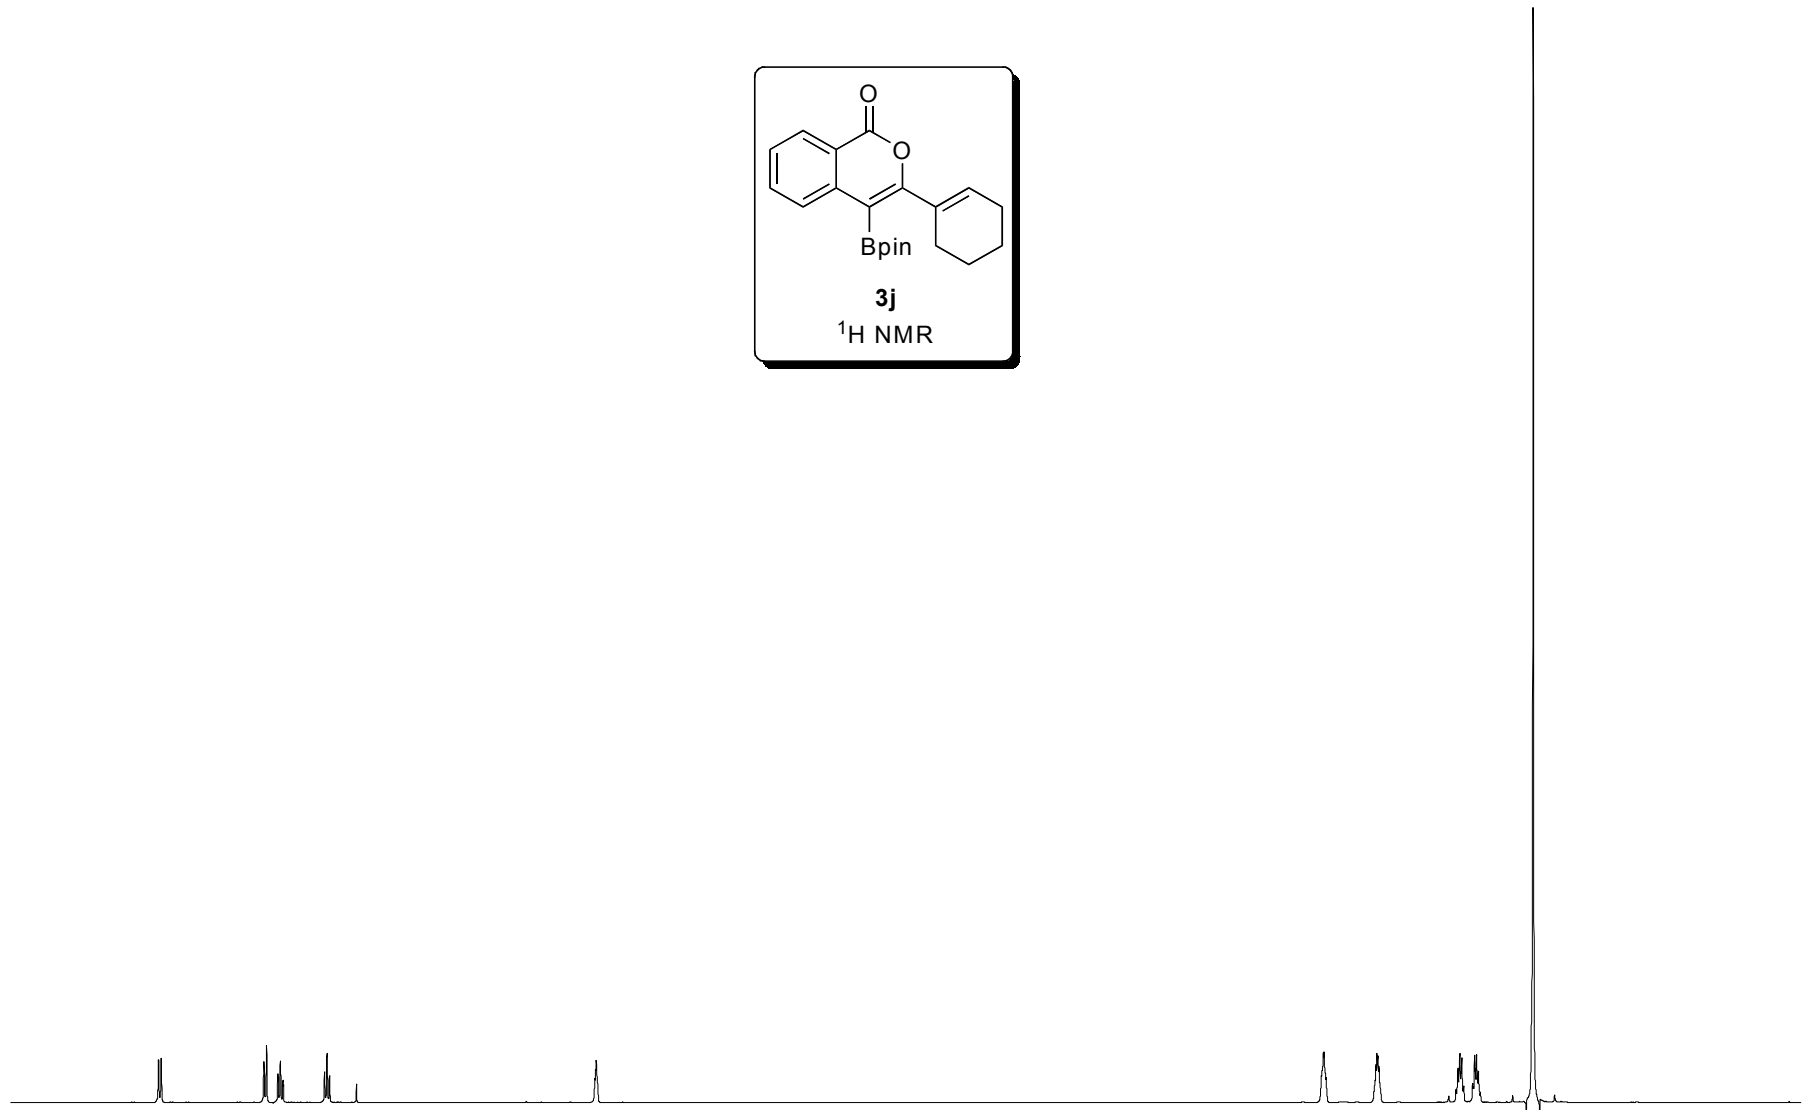

1.000

1.011  
1.022

1.022

1.005

2.021

2.028

2.042  
2.039

12.129

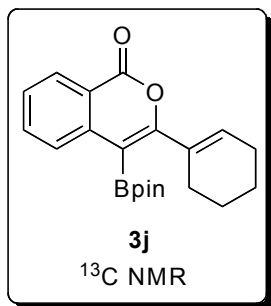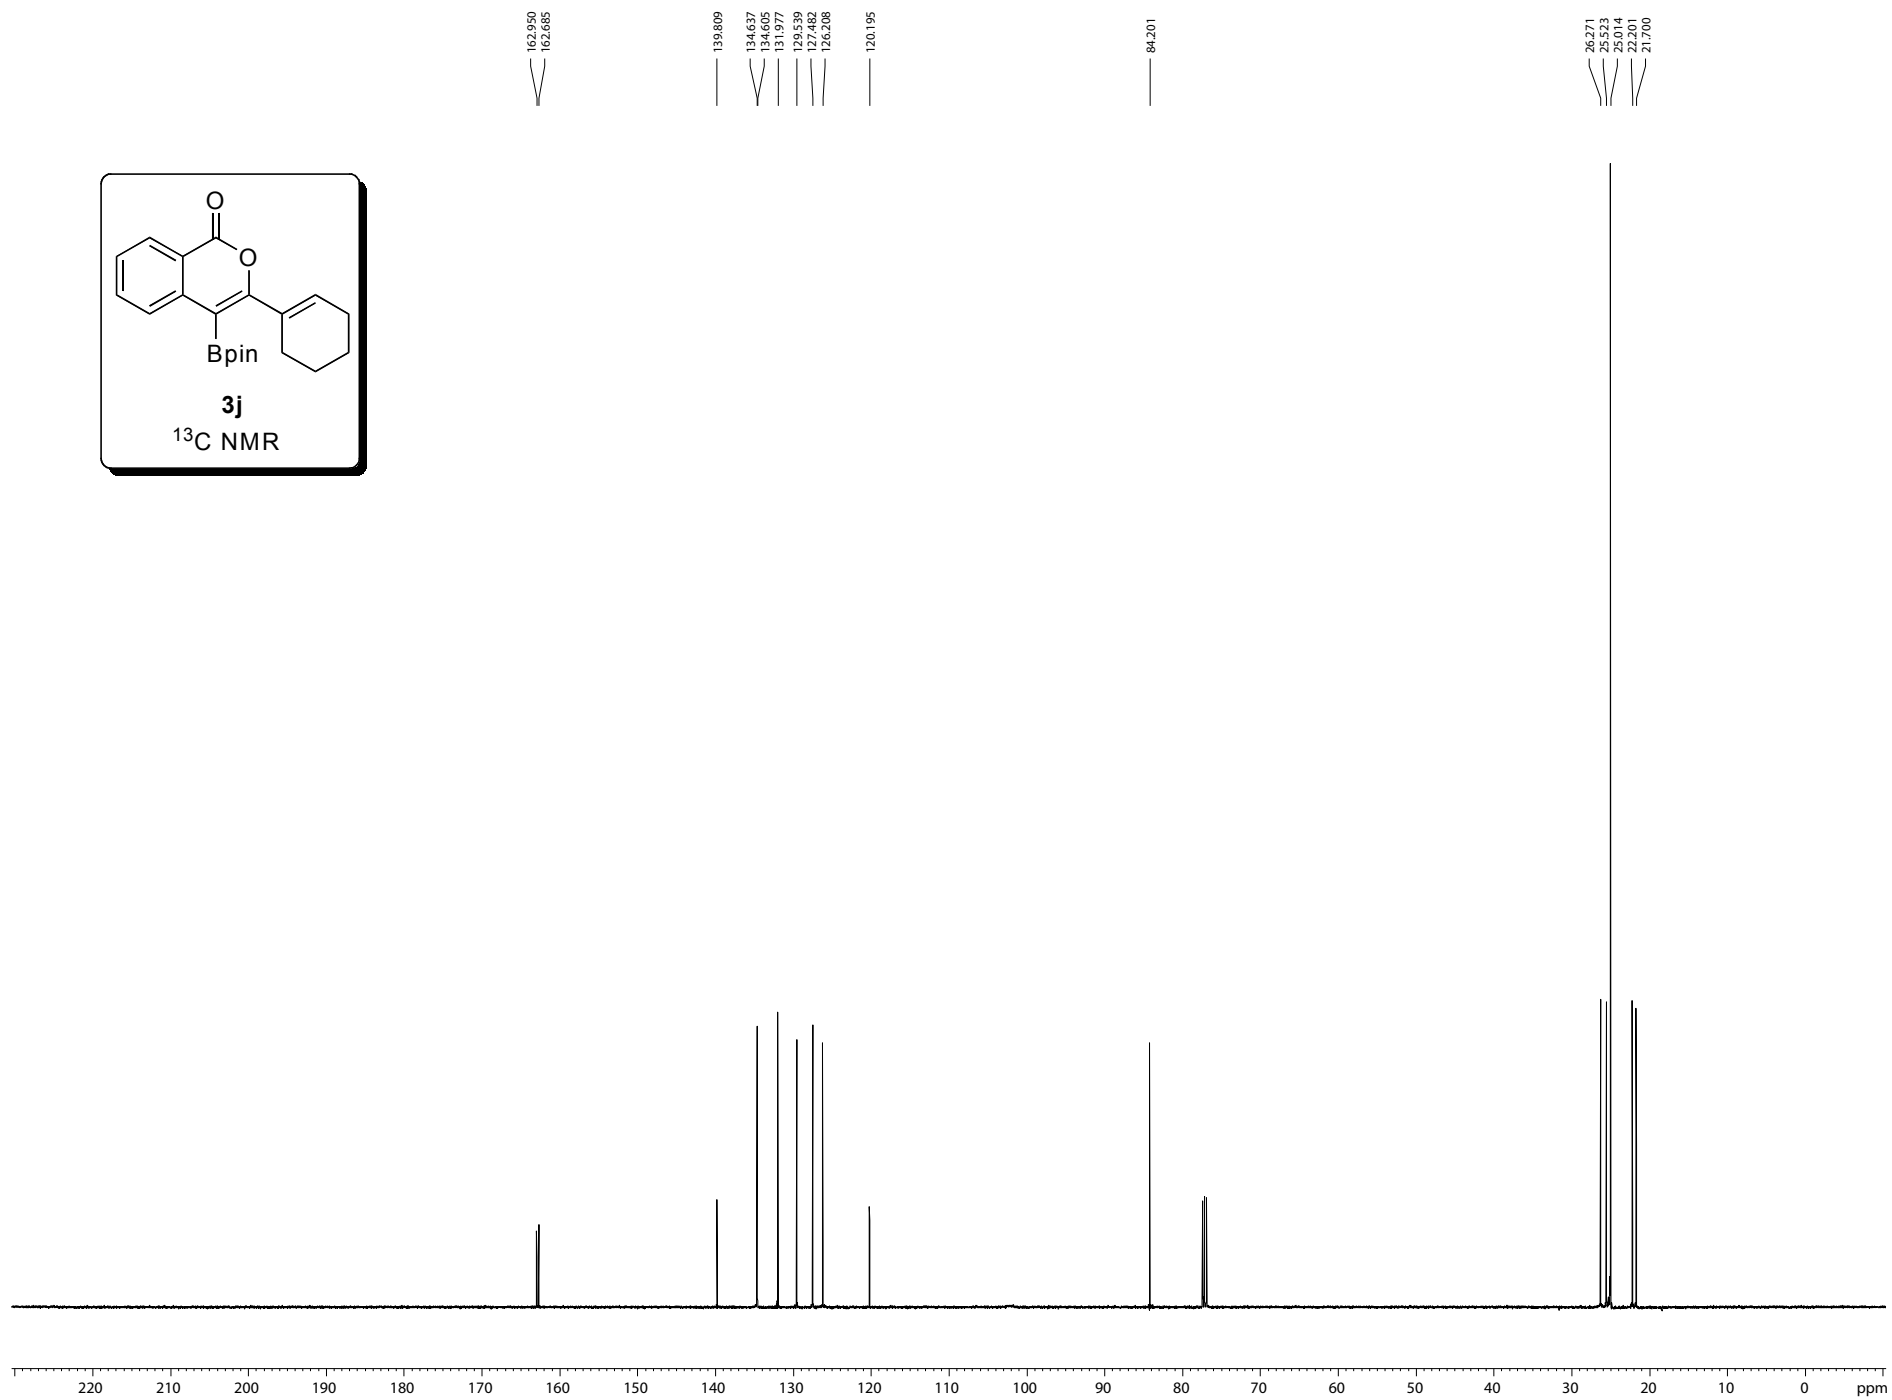

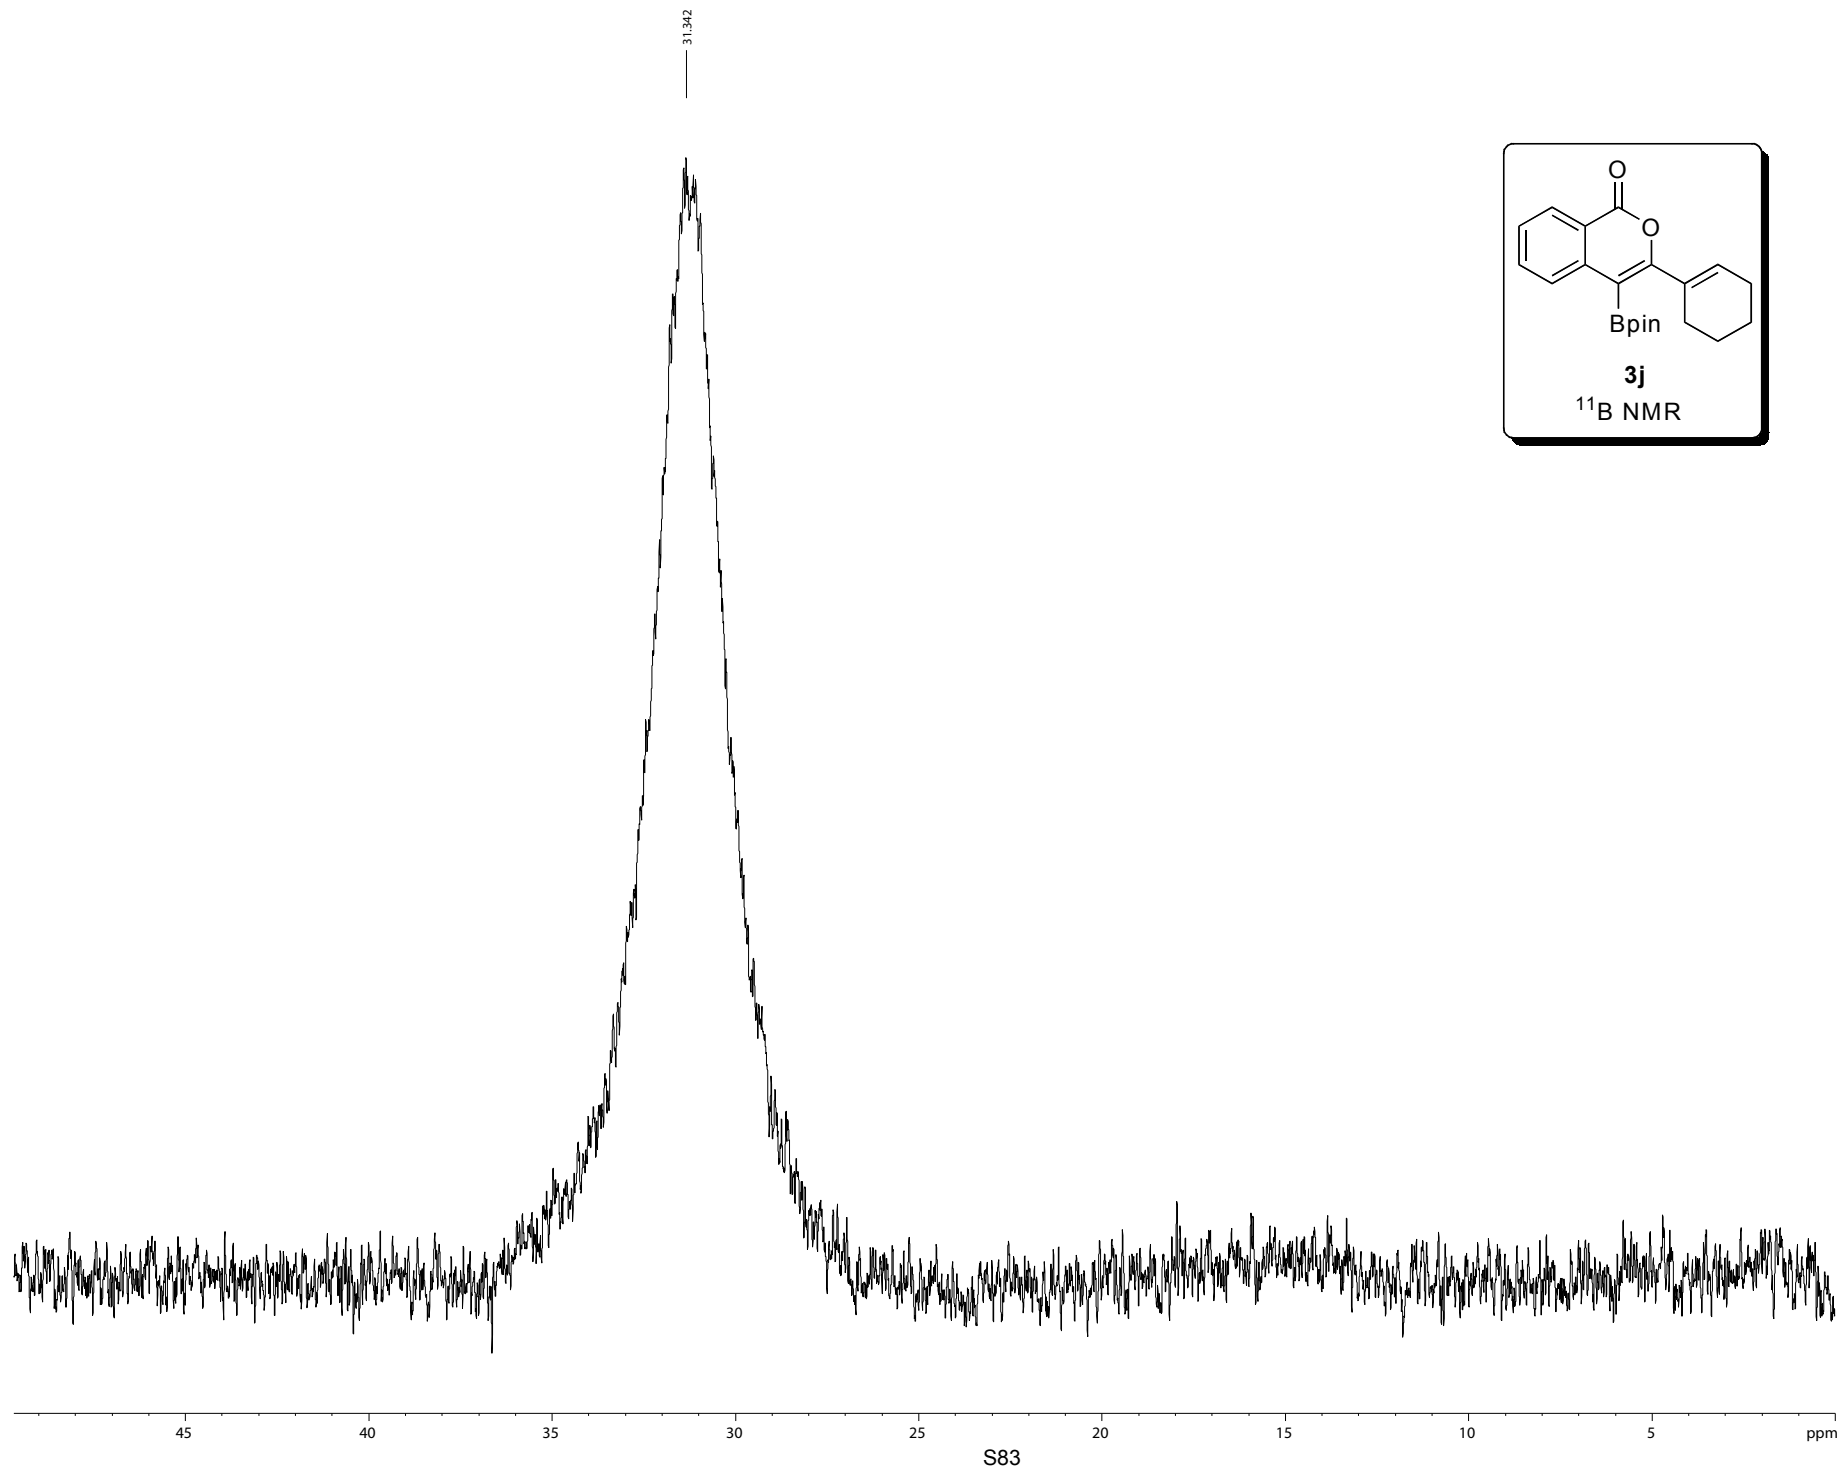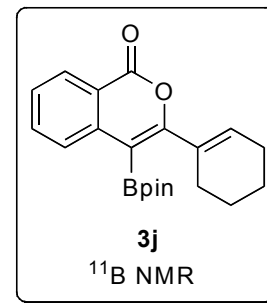

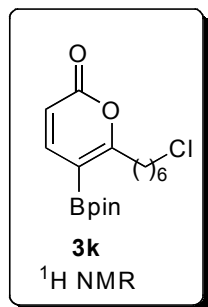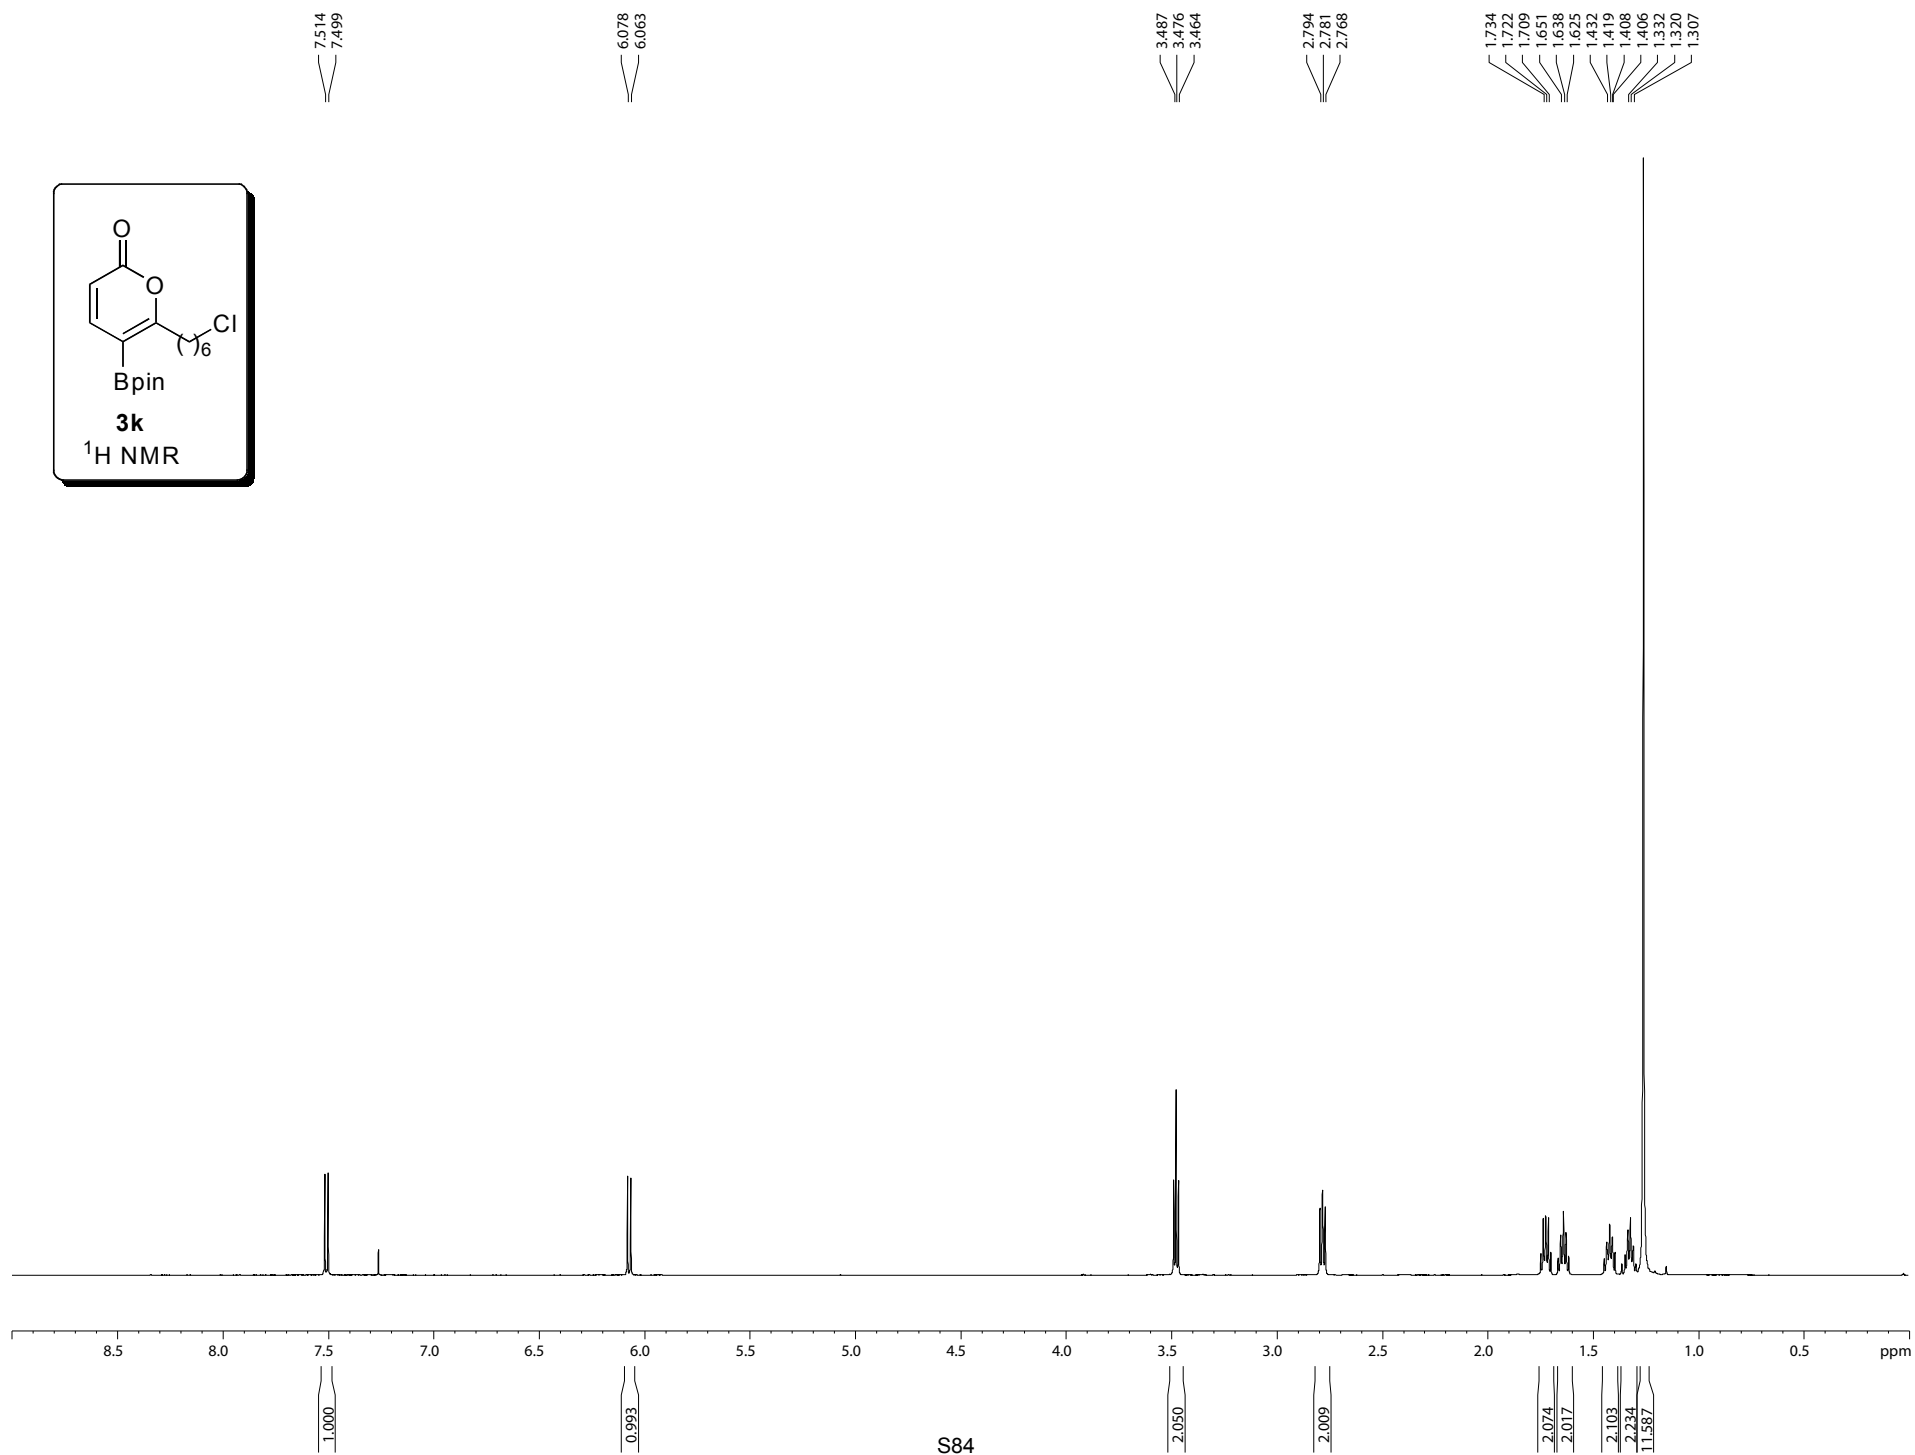

175.919

162.585

148.766

112.059

84.155

45.019

33.353

32.391

28.260

28.174

26.450

24.840

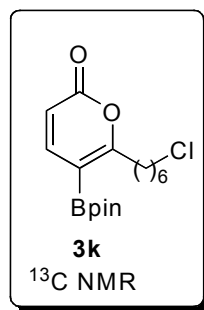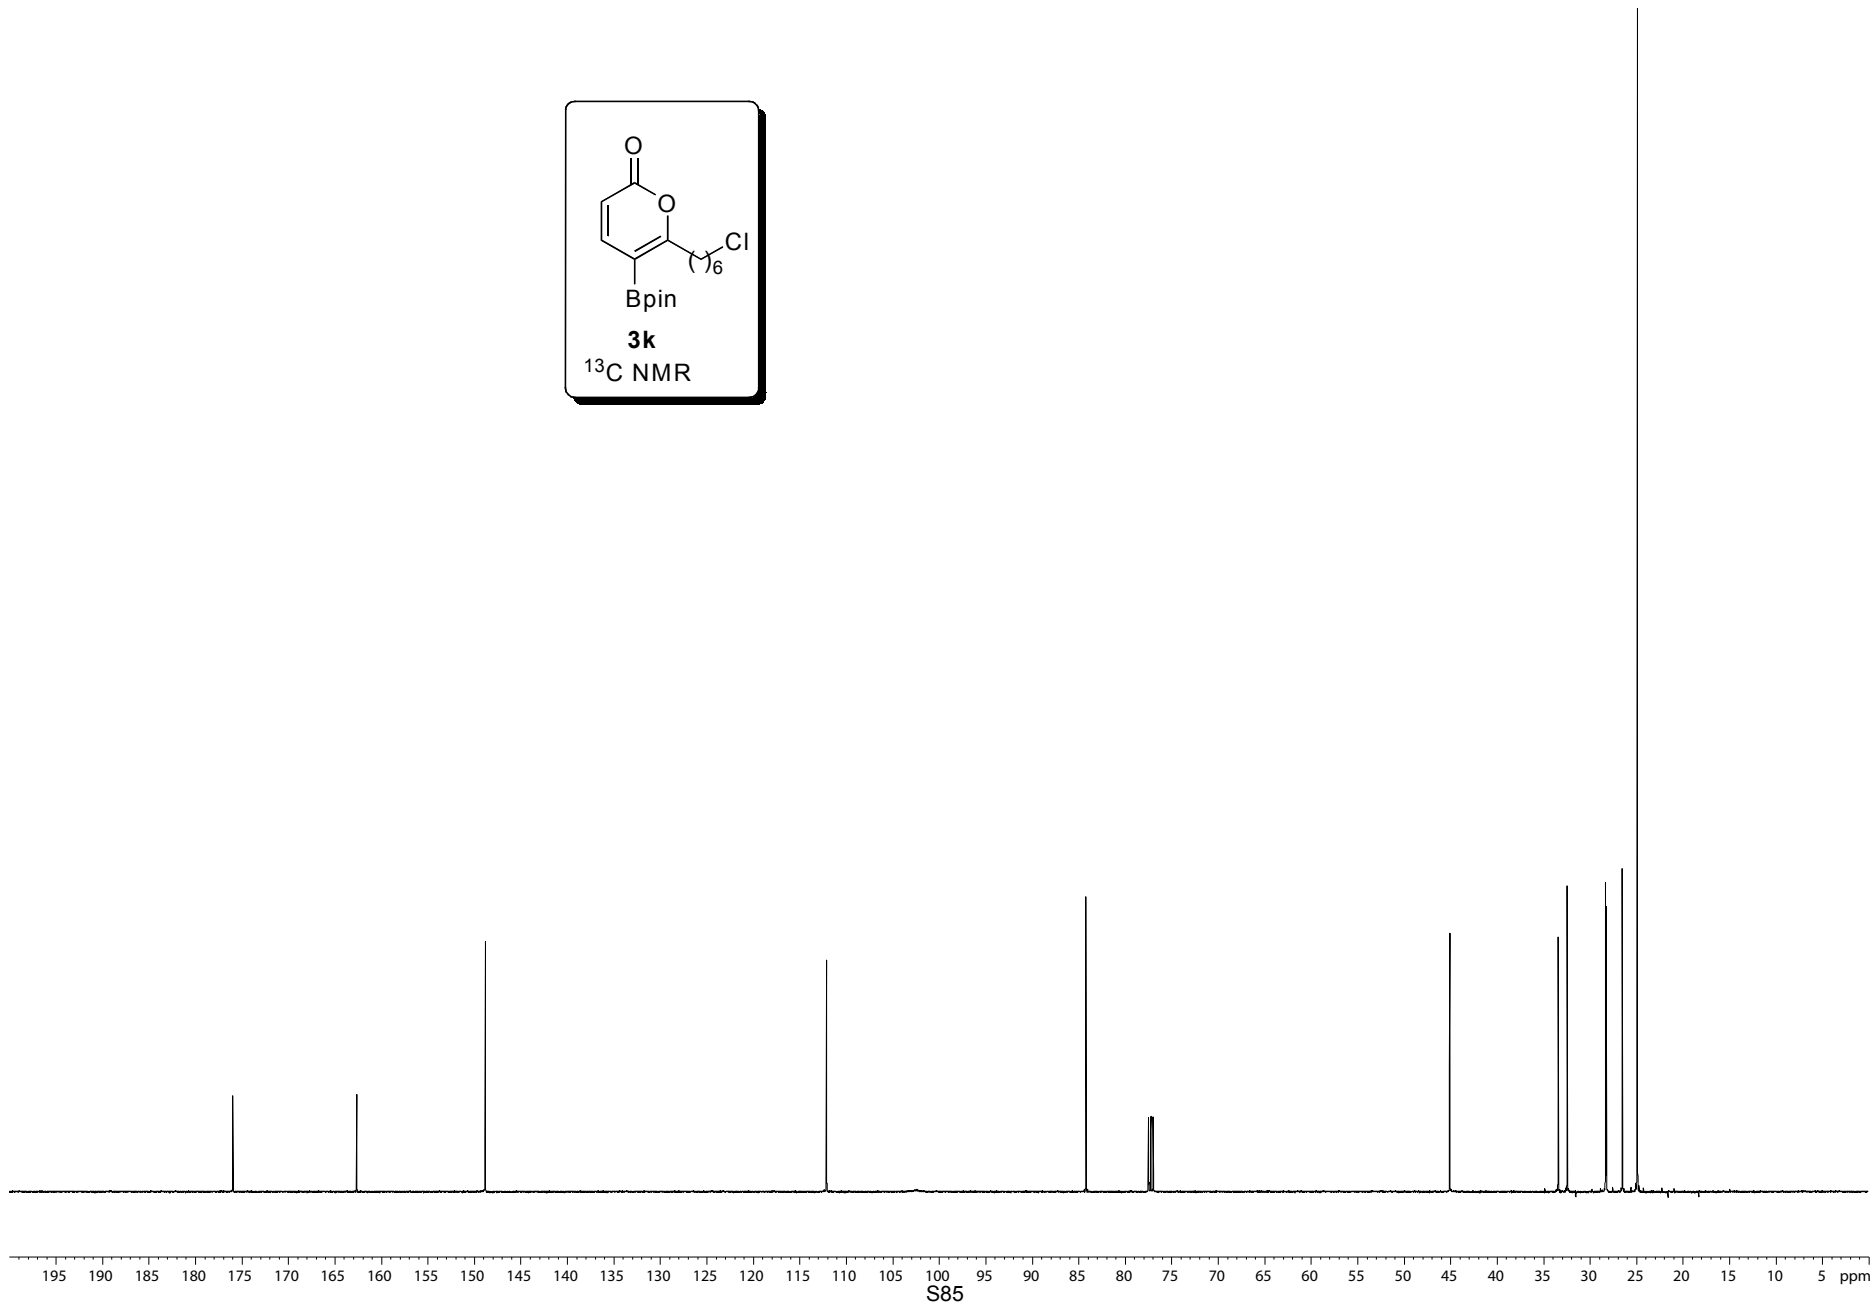

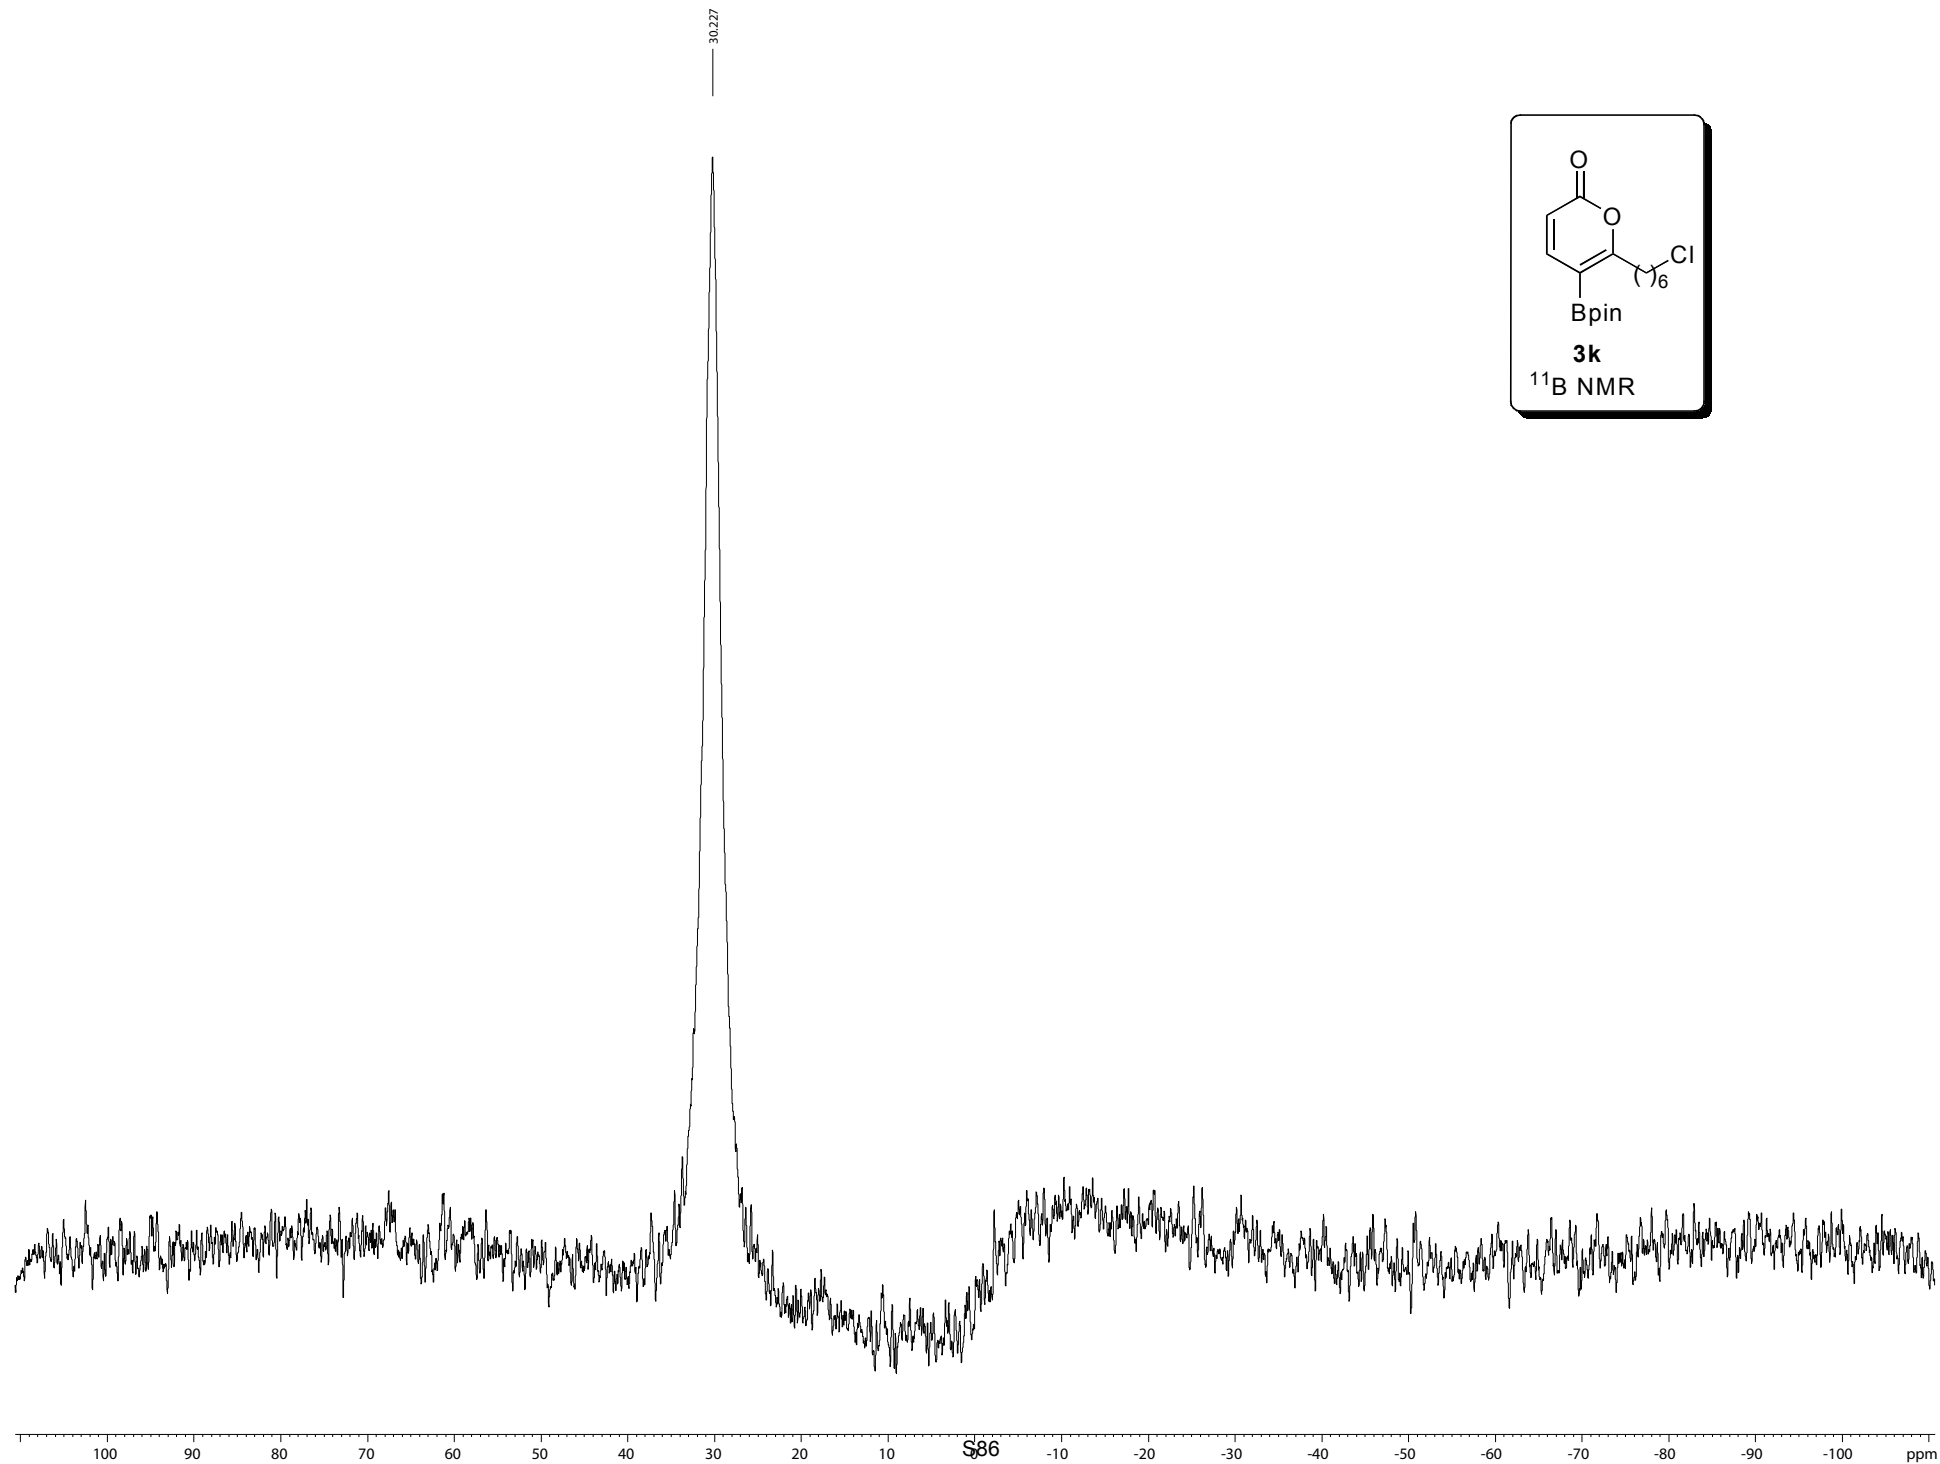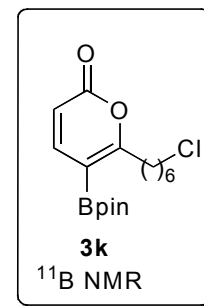

8.077  
8.075  
8.072  
8.070  
7.667  
7.651  
7.569  
7.567  
7.561  
7.539  
7.289  
7.284  
7.281  
7.275

6.206  
6.190

1.293

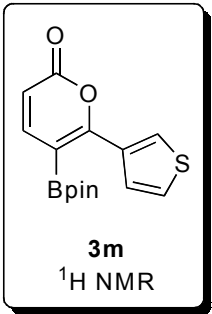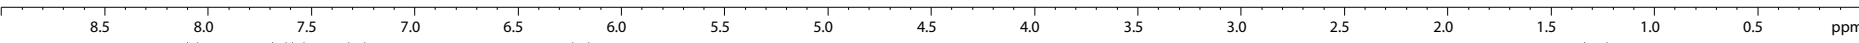

0.926

0.991  
0.956

1.083

0.971

12.000

164.143  
161.700

149.630

134.638

129.638

128.073

125.052

112.562

84.553

24.799

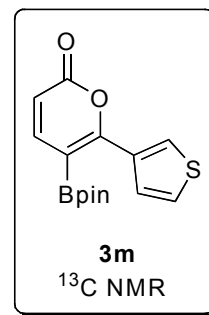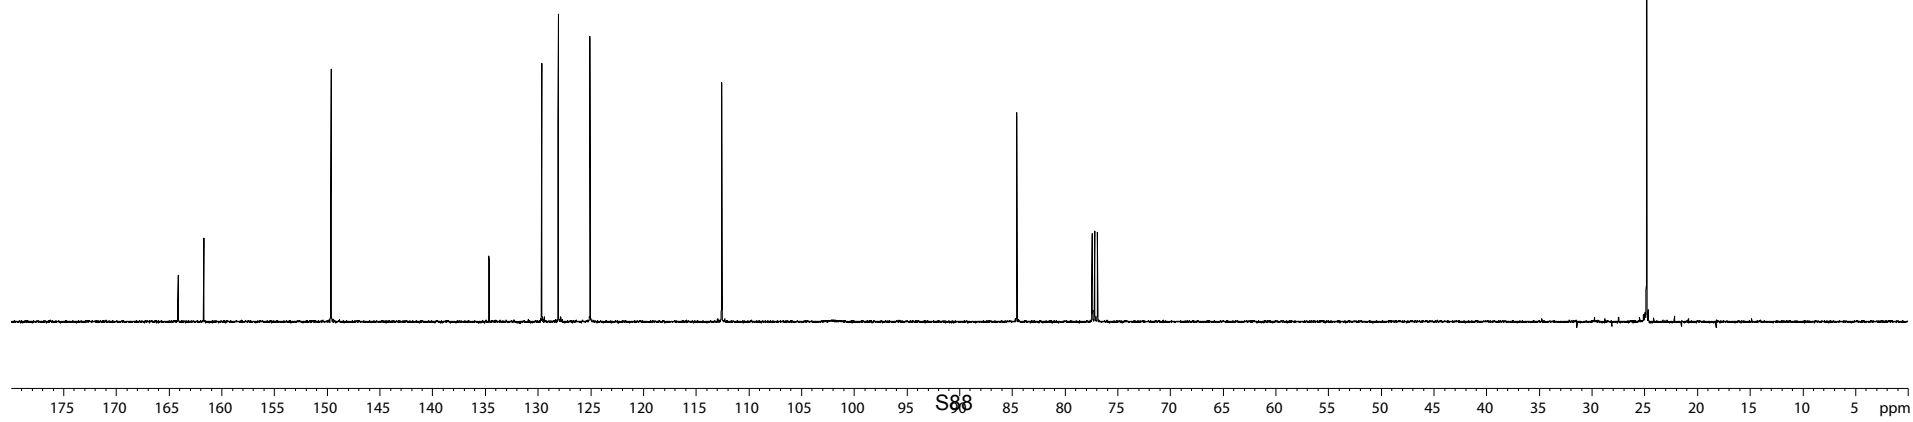



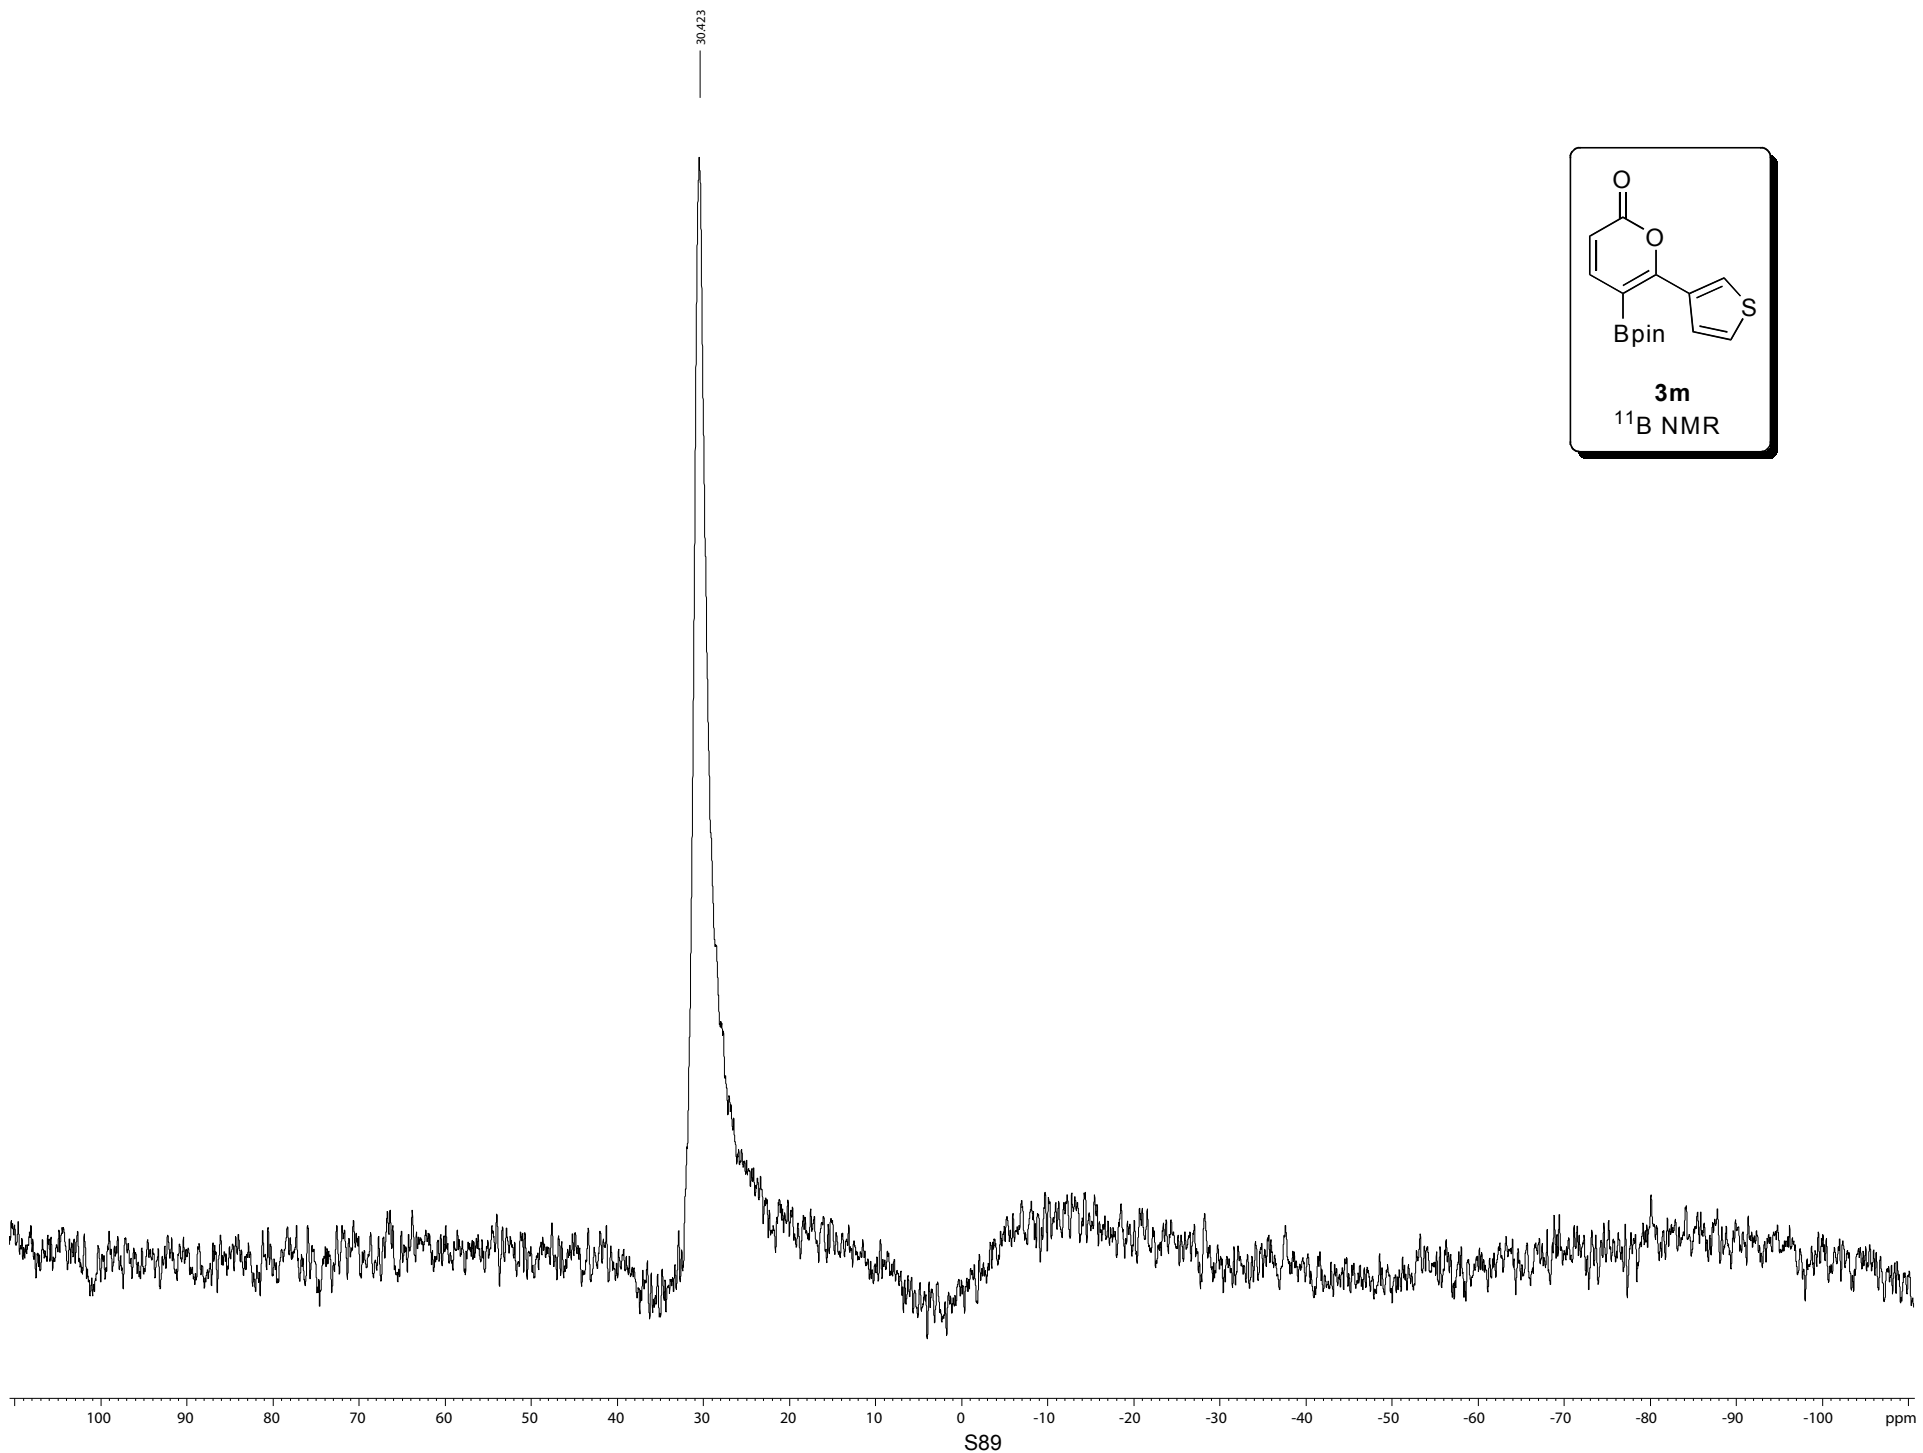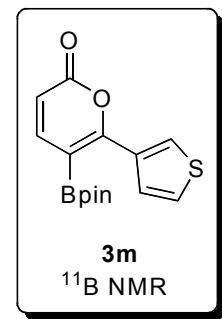

7.649  
7.637  
7.634  
7.480  
7.478  
7.468  
7.457  
7.455  
7.406  
7.393  
7.380  
7.260

6.274  
6.258

1.246

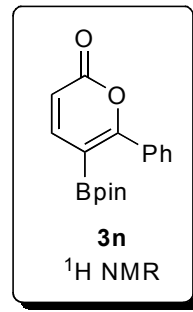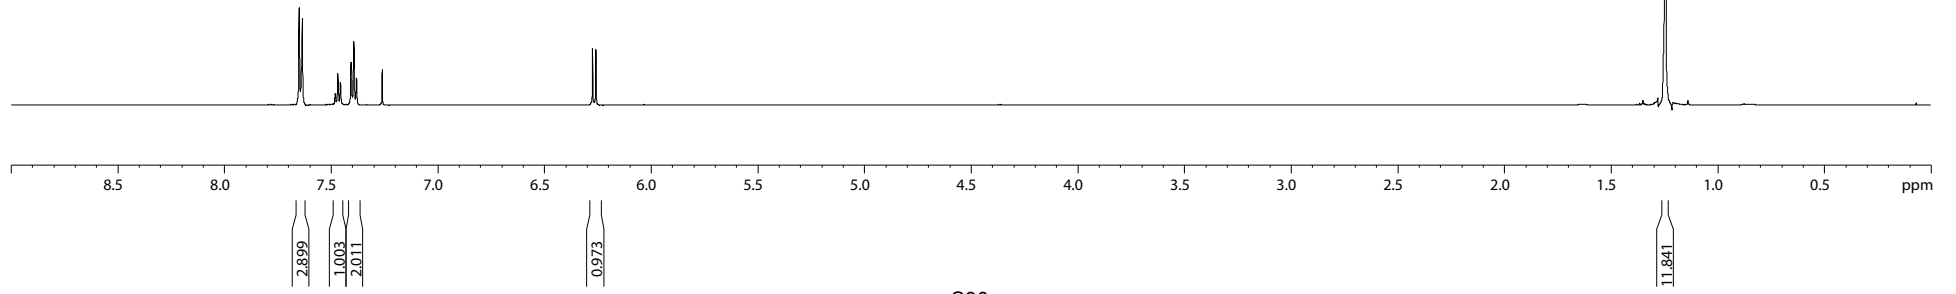

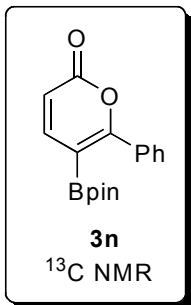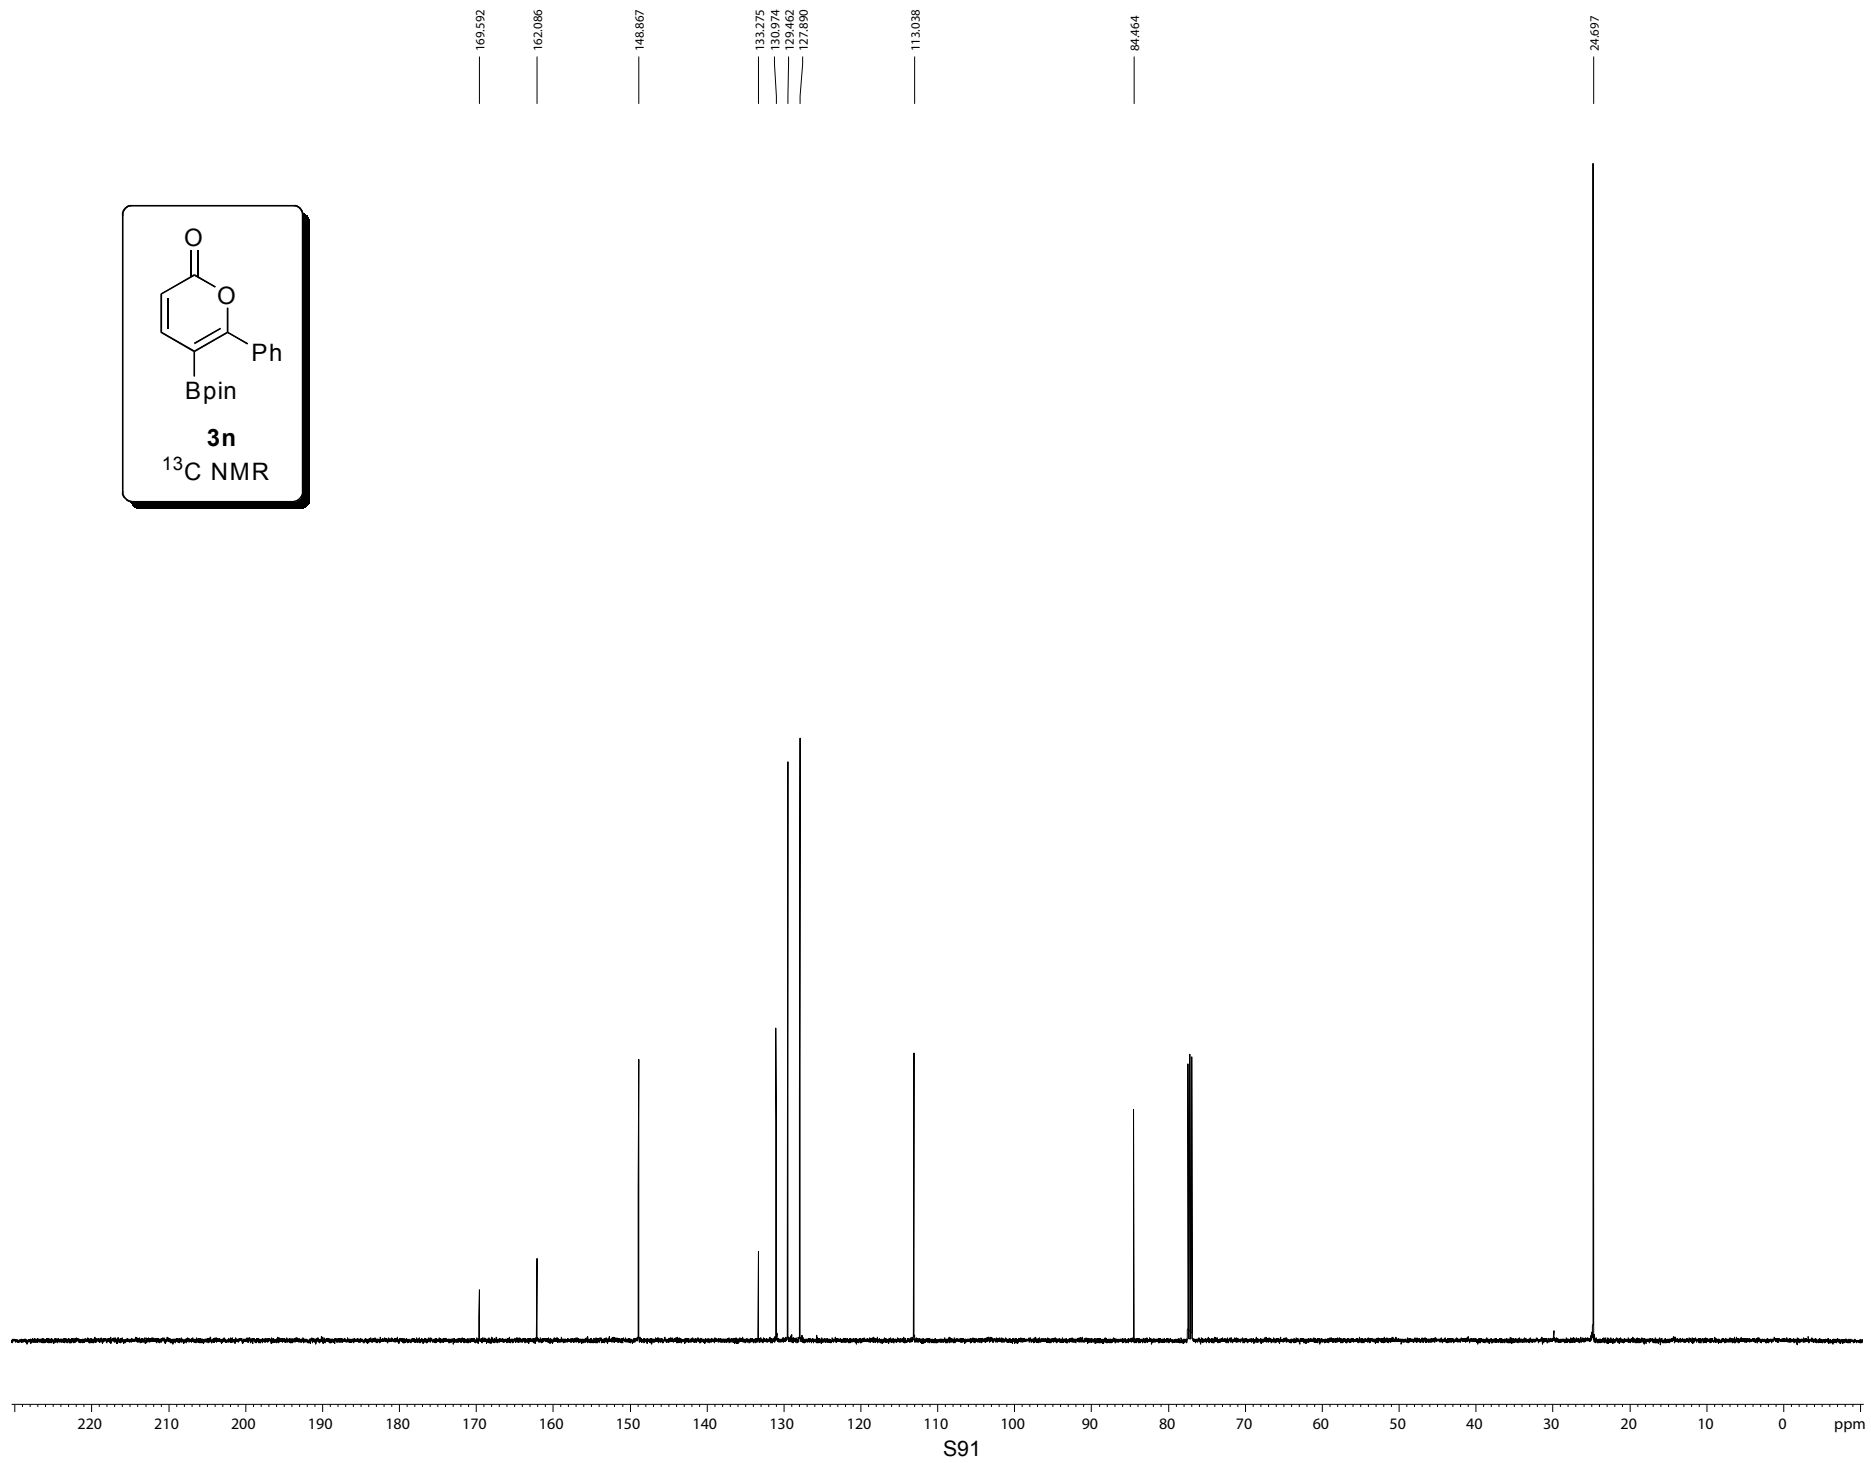

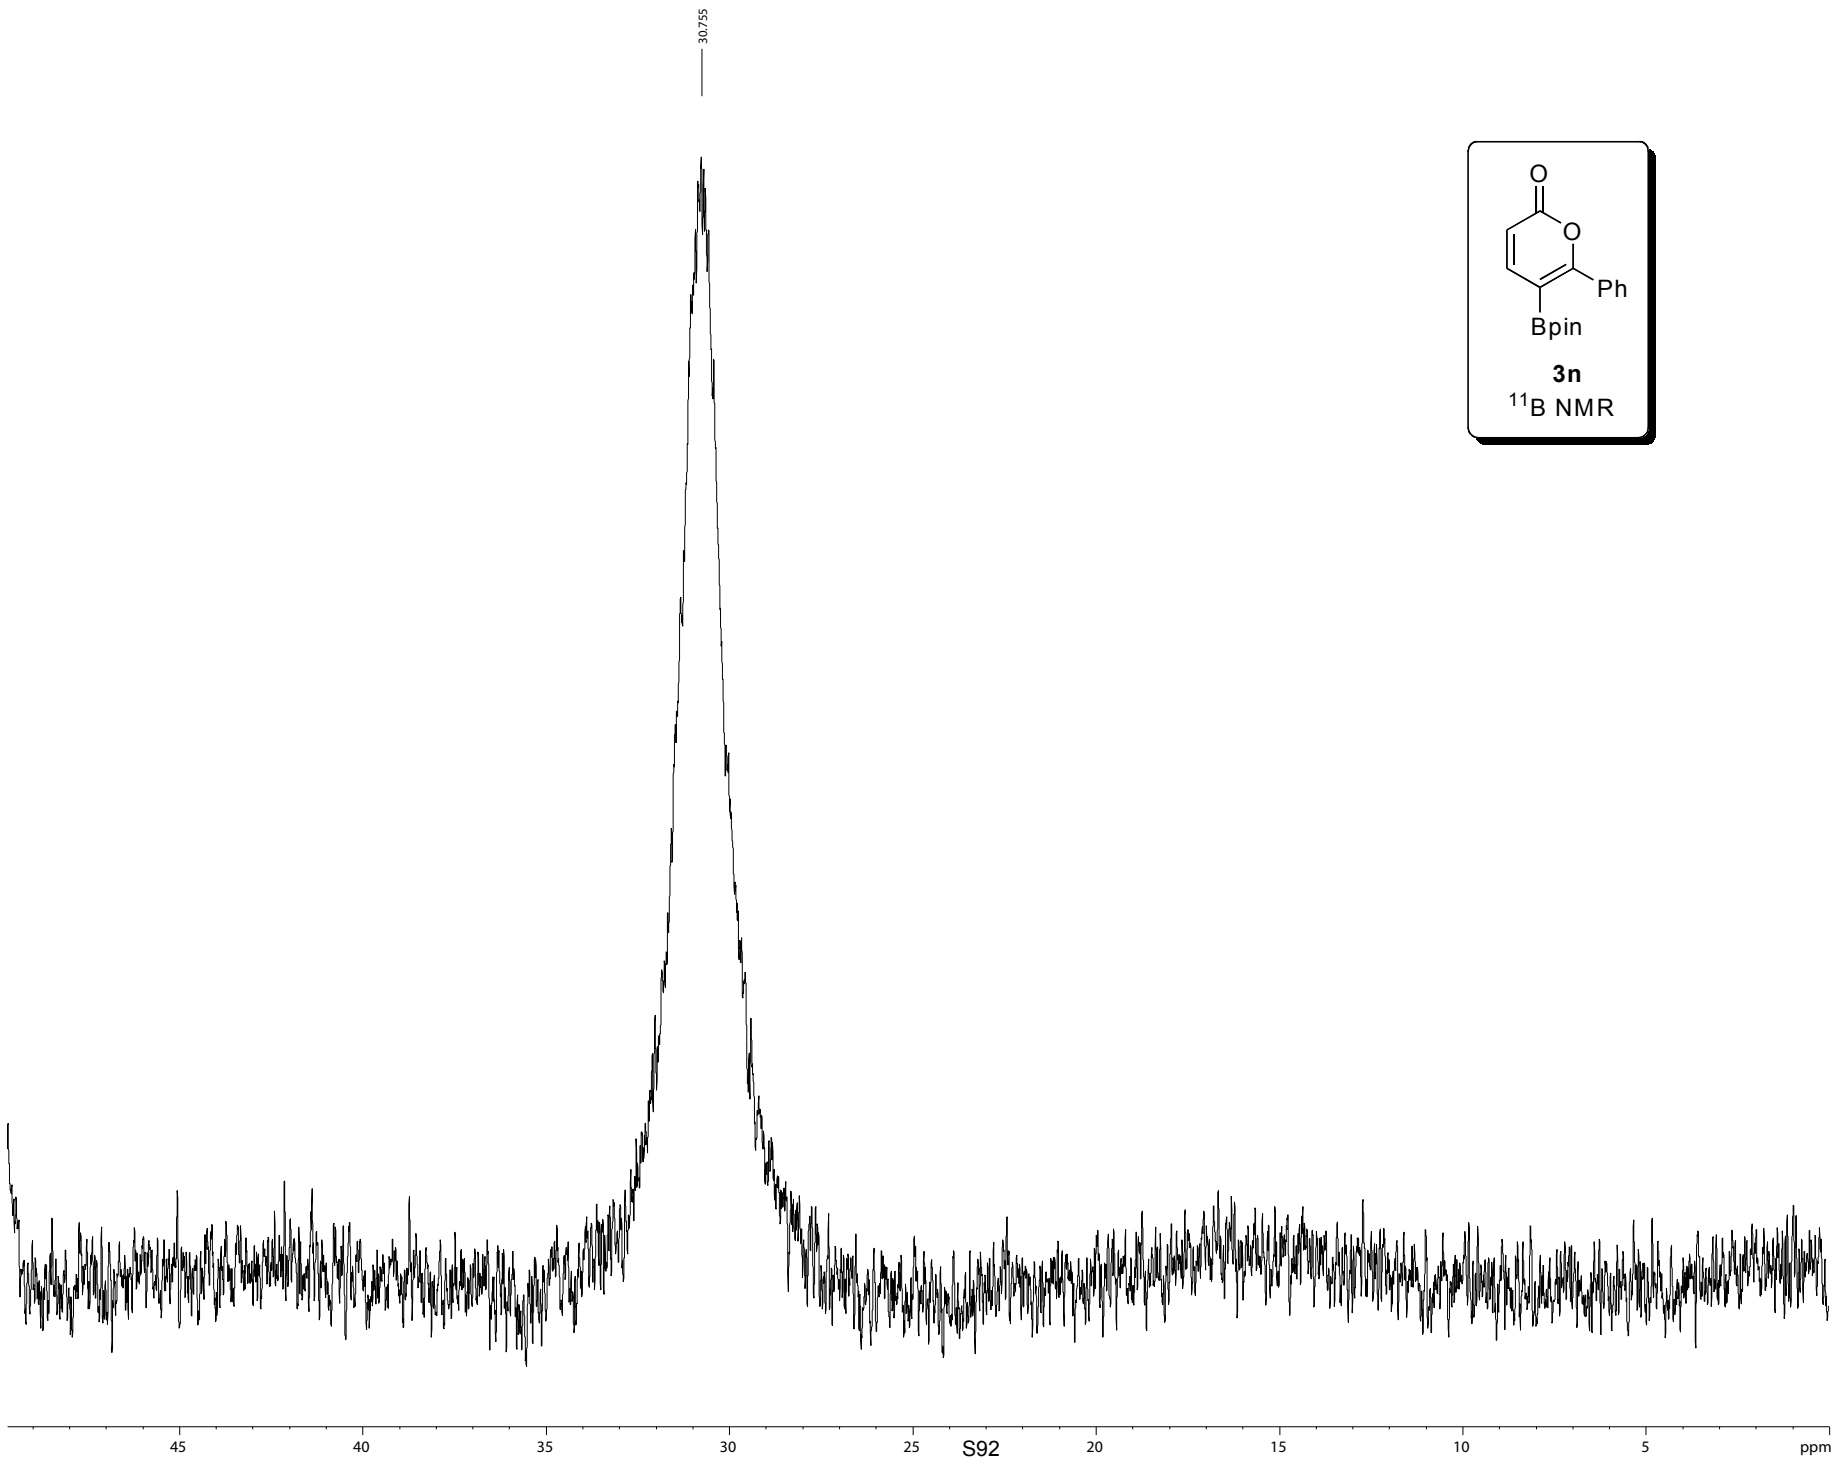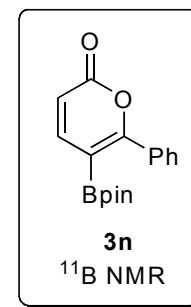

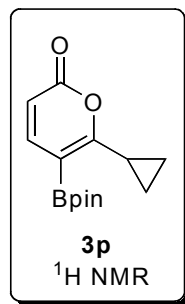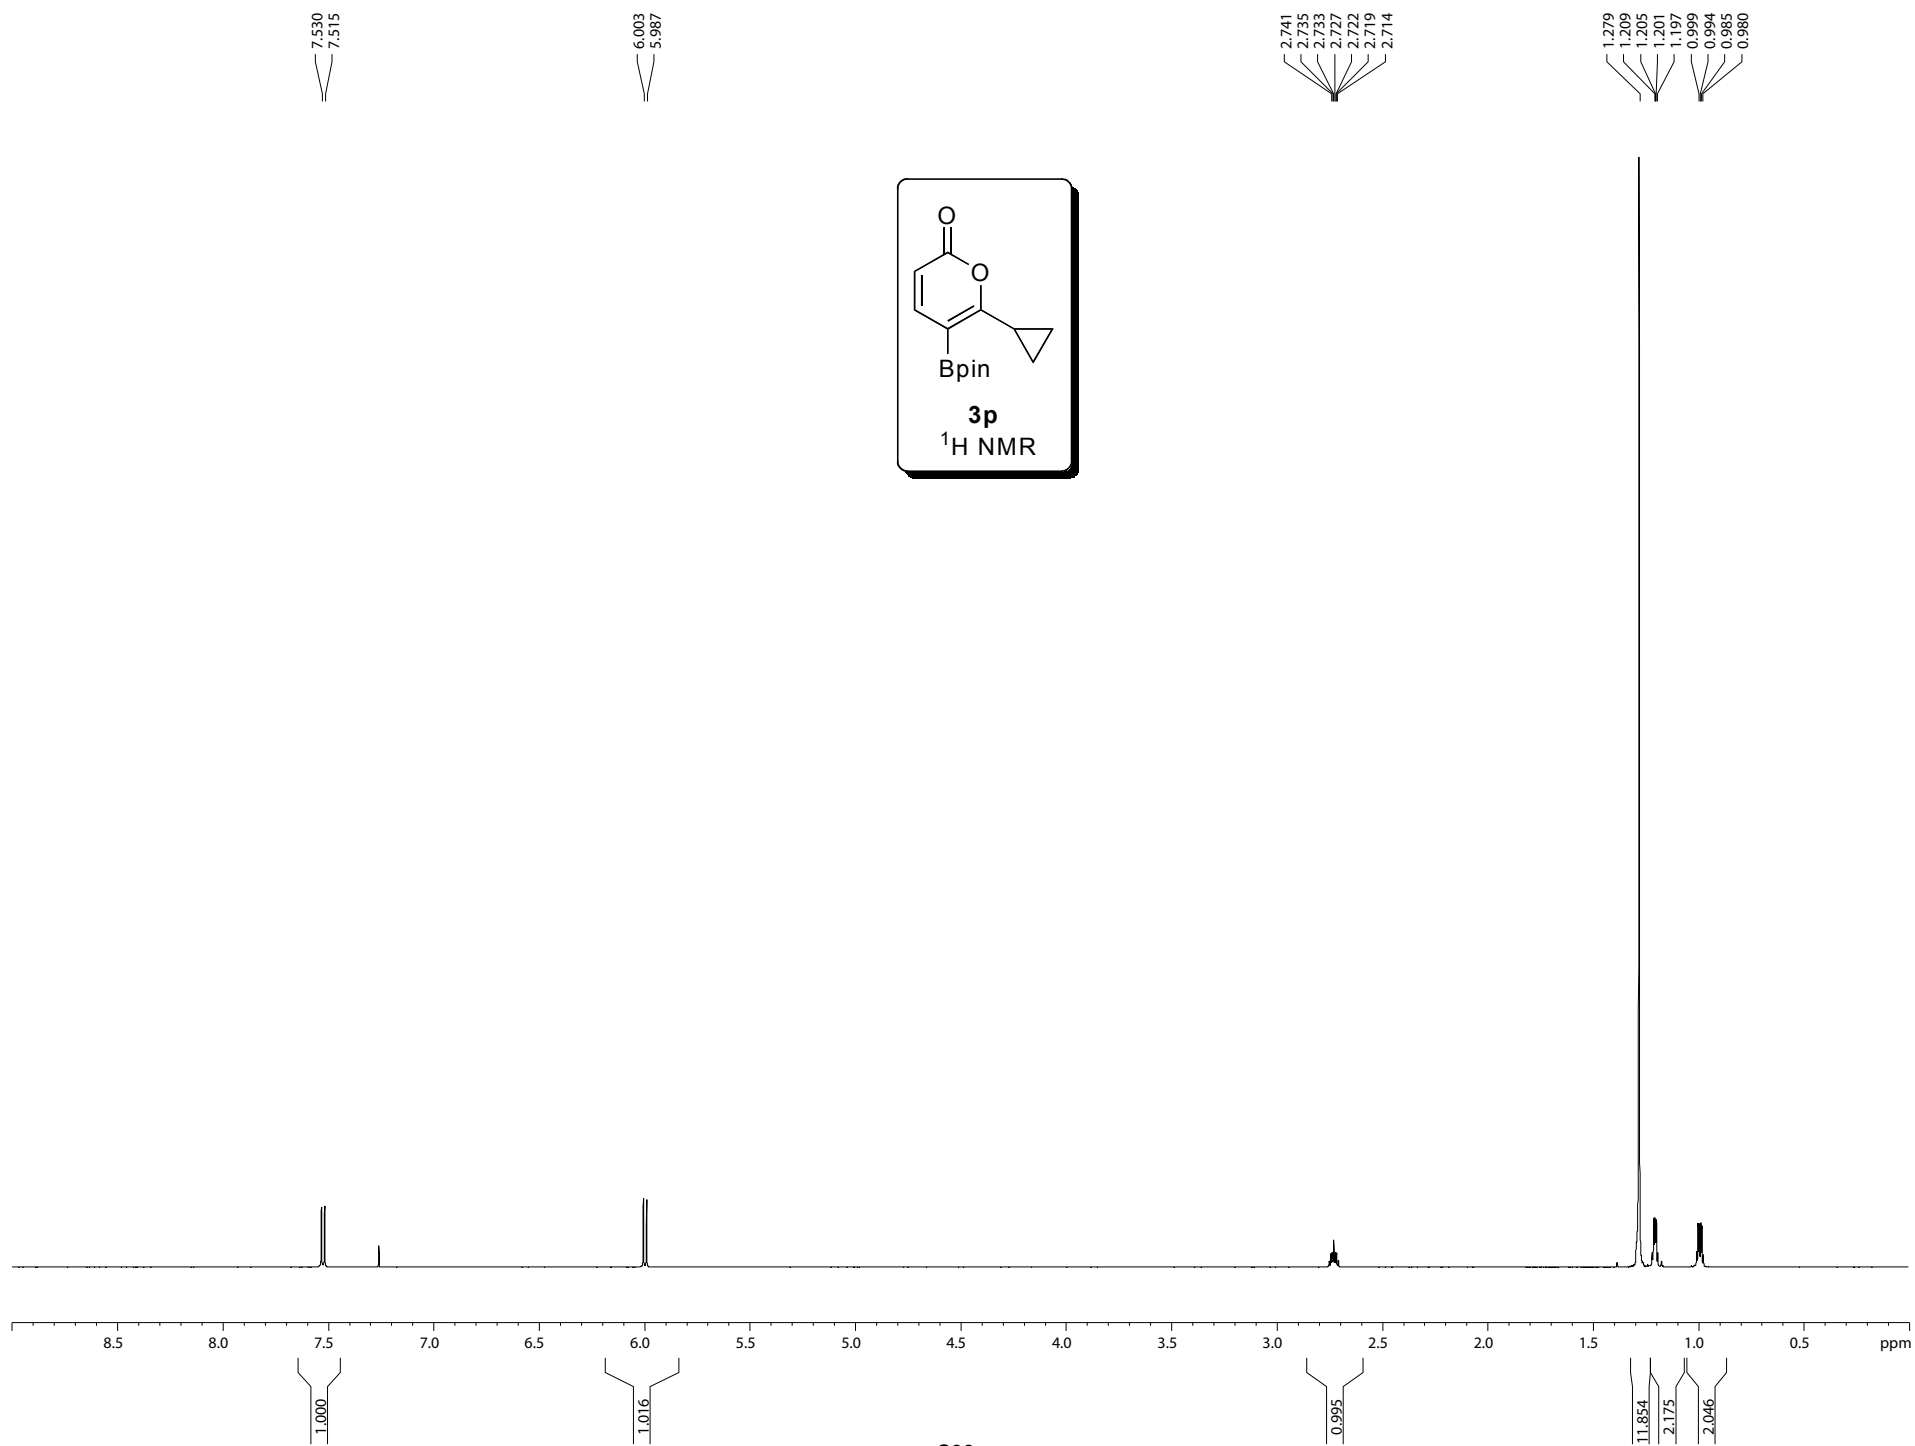

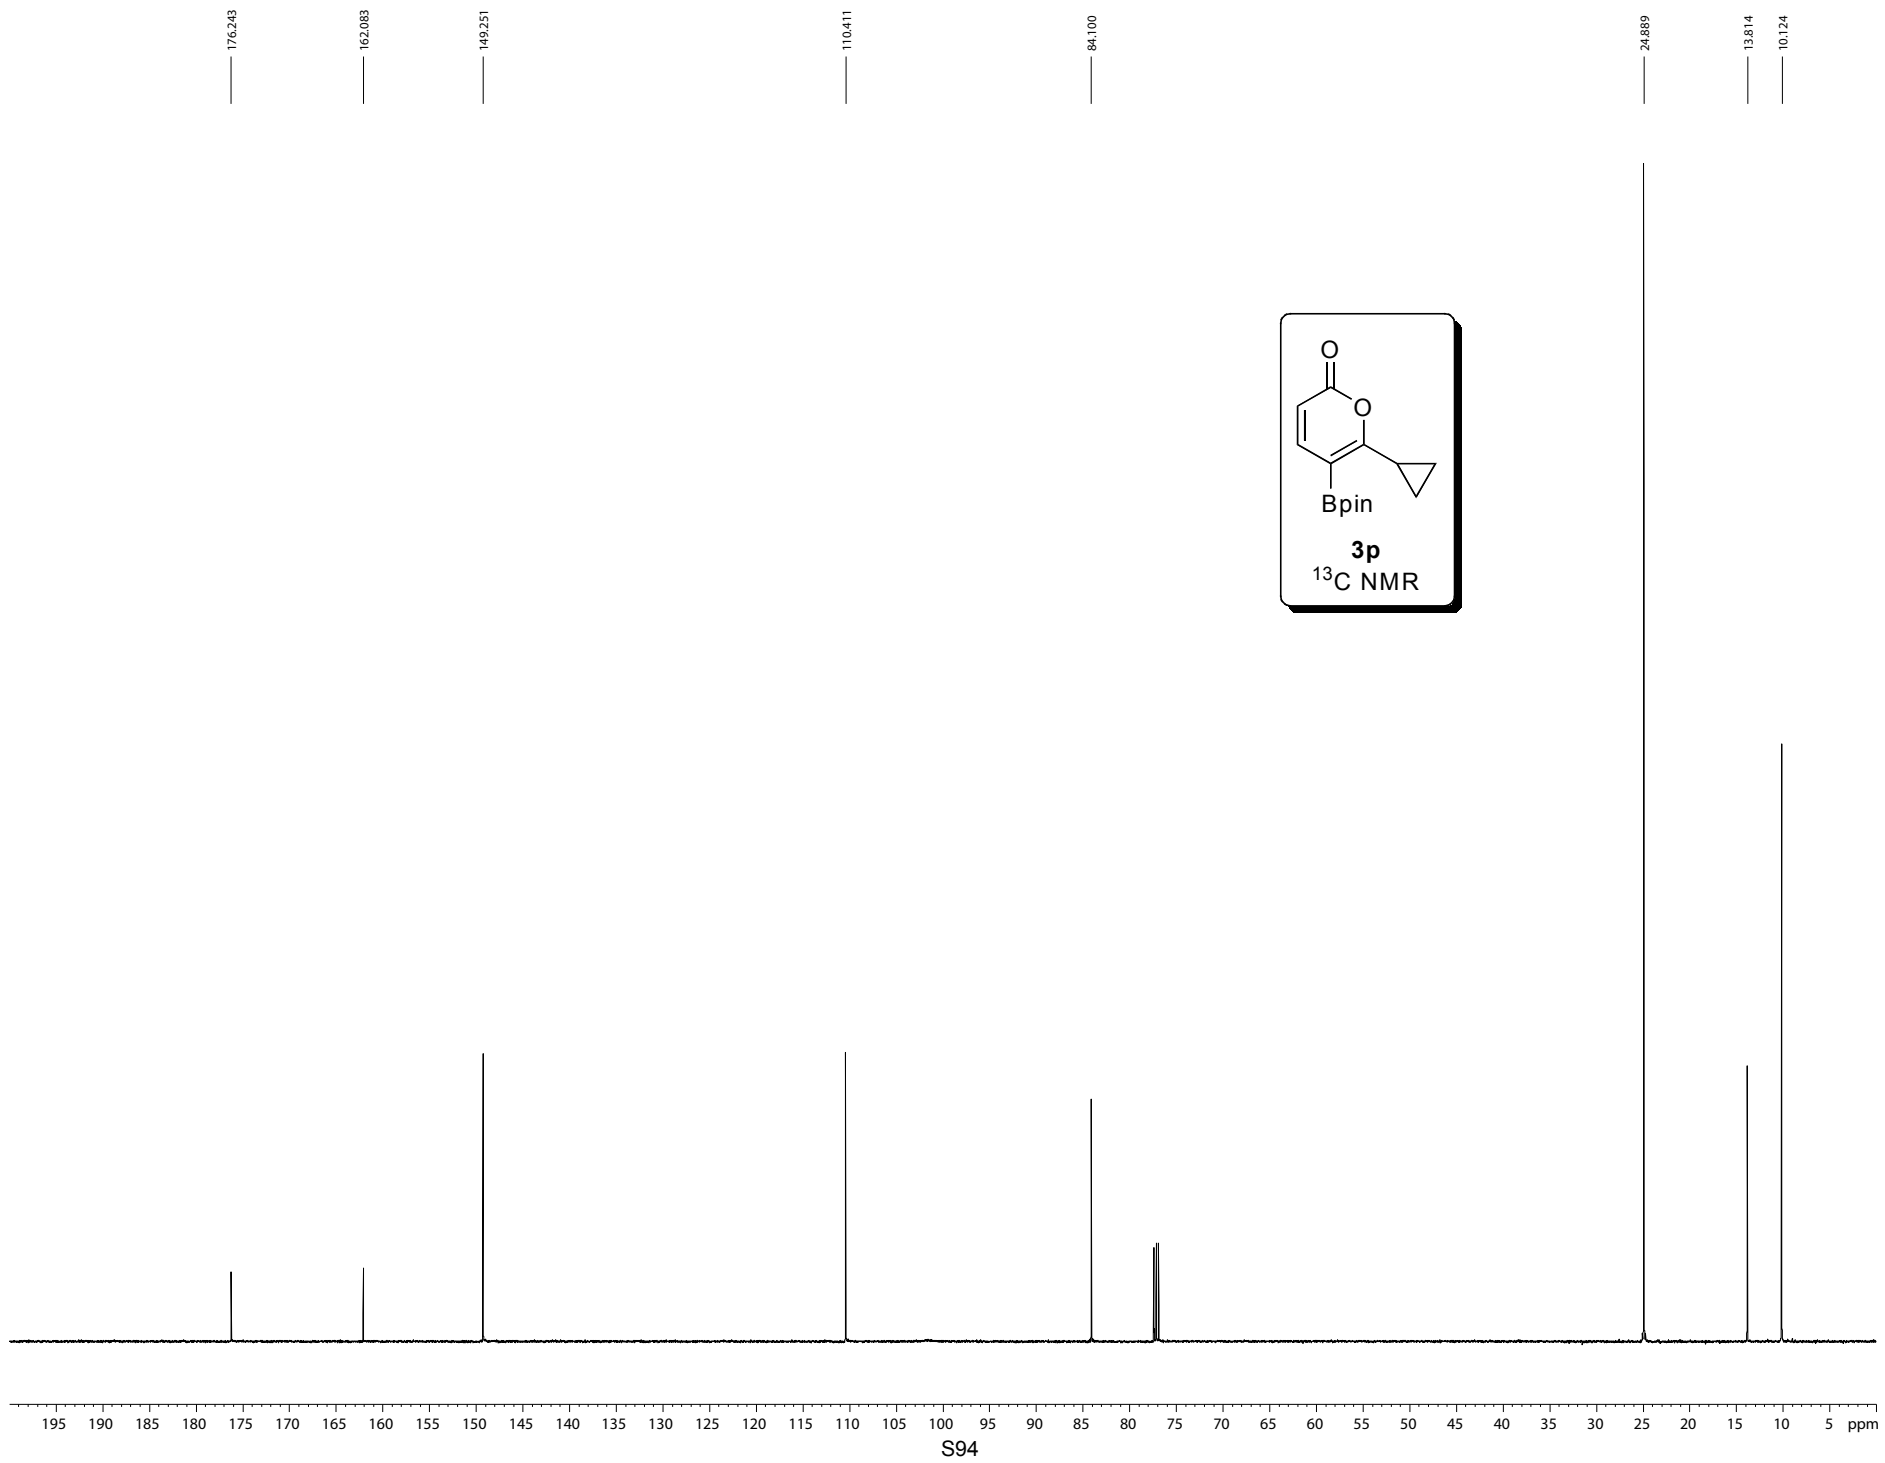

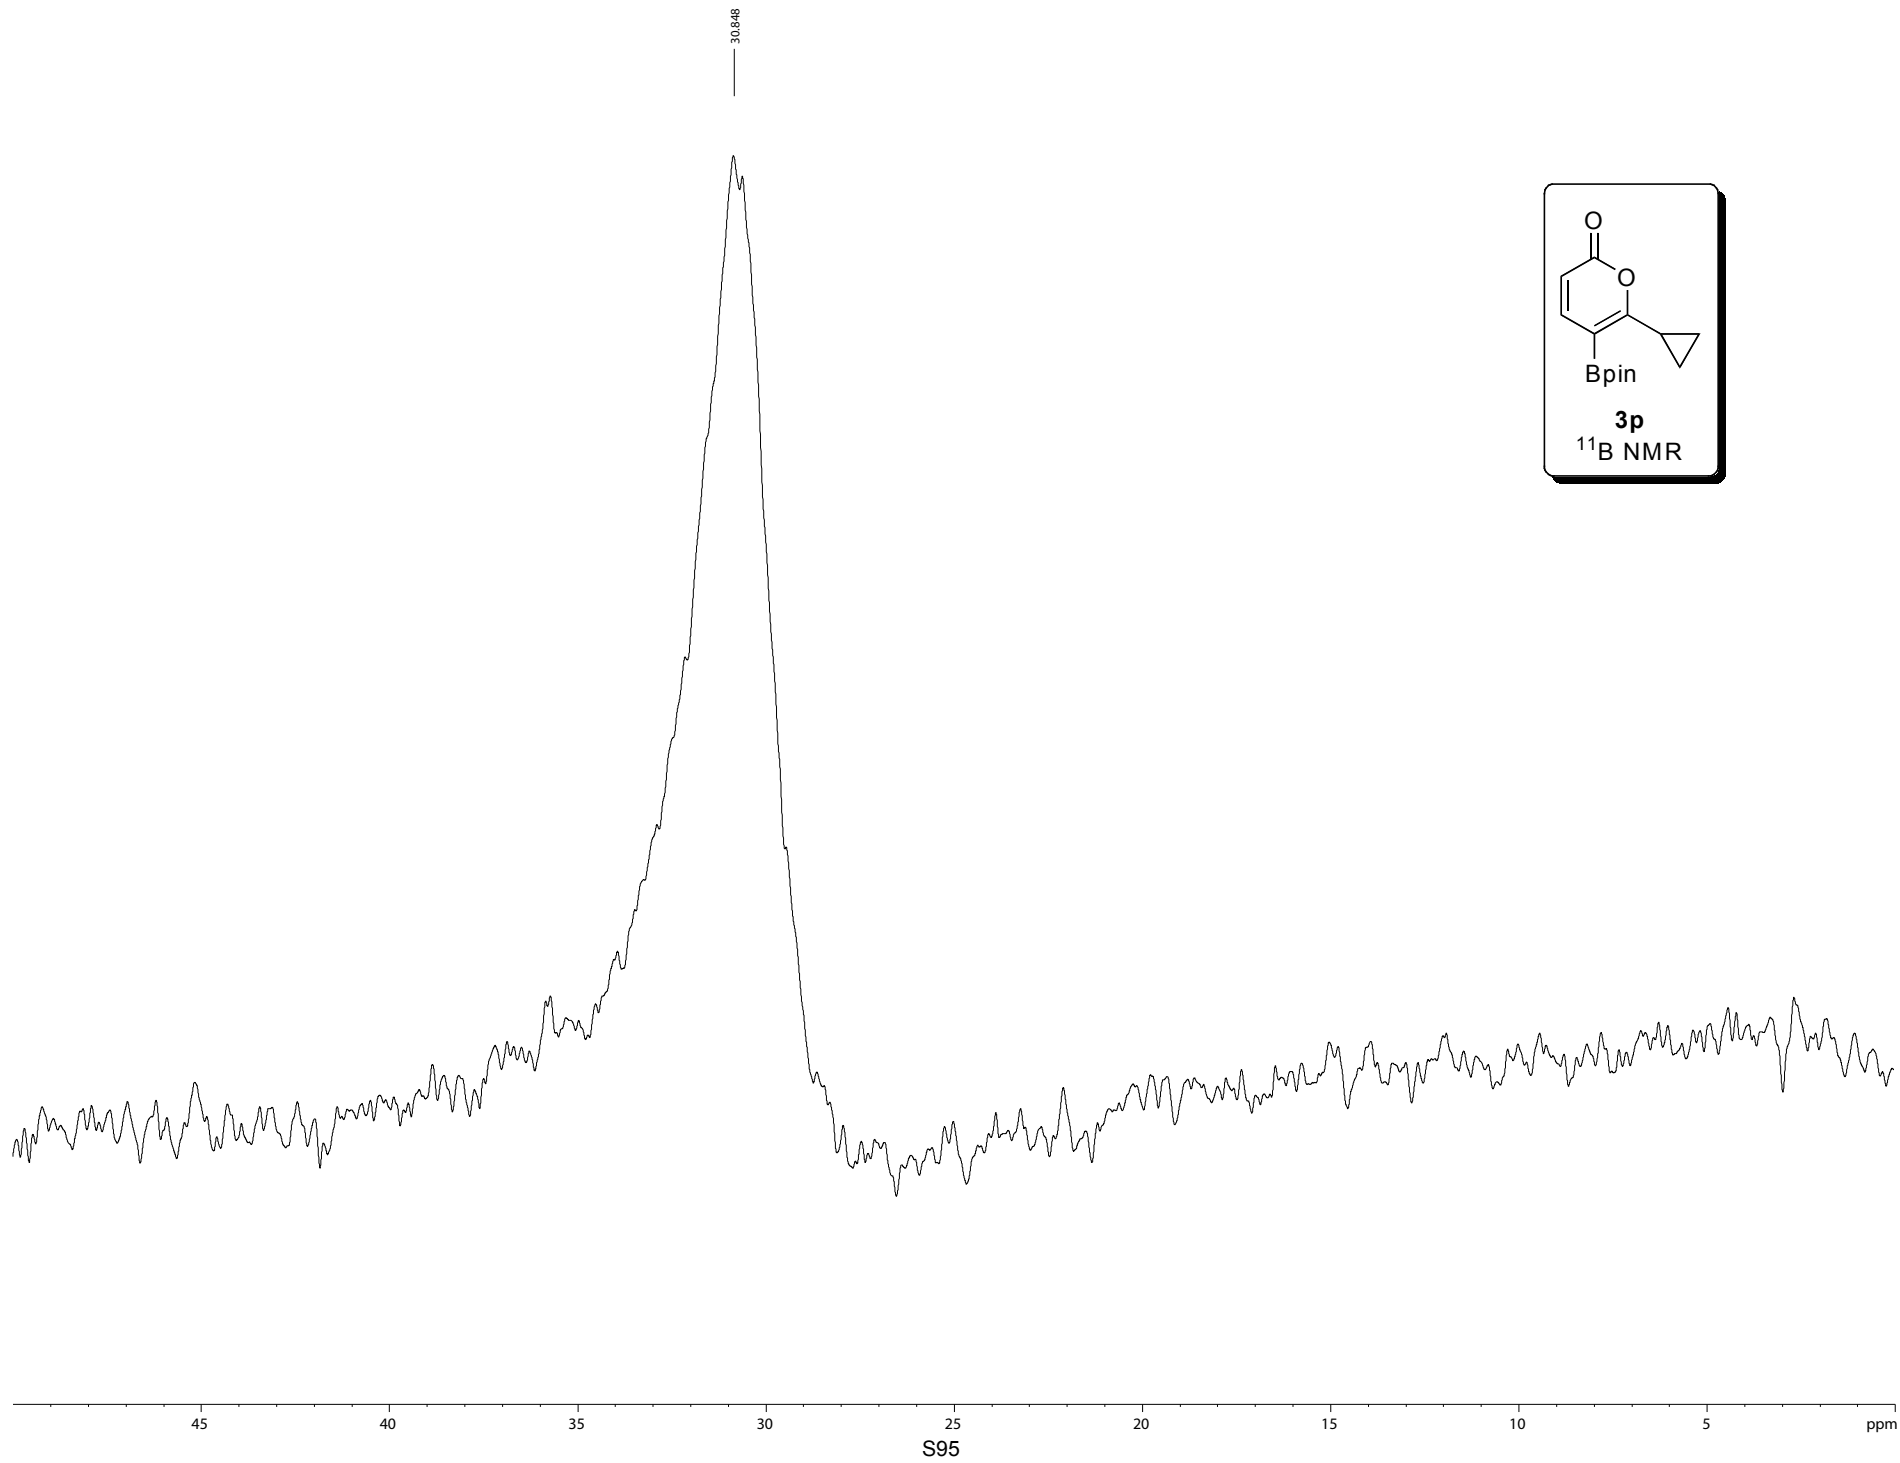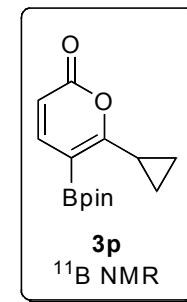

8.273  
8.271  
8.260  
8.258  
8.068  
8.066  
8.053  
7.870  
7.868  
7.858  
7.855  
7.845  
7.842  
7.832  
7.830  
7.820  
7.818  
7.807  
7.805

5.097  
5.089  
5.084  
5.076

2.083  
2.075  
2.071  
2.068  
2.060  
2.056  
2.052  
2.048  
2.044  
2.041  
2.036  
2.032  
2.025  
2.014  
2.013  
2.010  
2.002  
2.000  
1.998  
1.987  
1.976  
1.963  
1.497  
1.494  
1.486  
1.483  
1.478  
1.475  
1.471  
1.467  
1.457  
1.444  
1.392  
1.380  
1.370  
1.358  
1.346  
1.333  
1.321  
1.299  
0.898

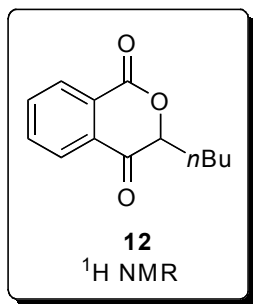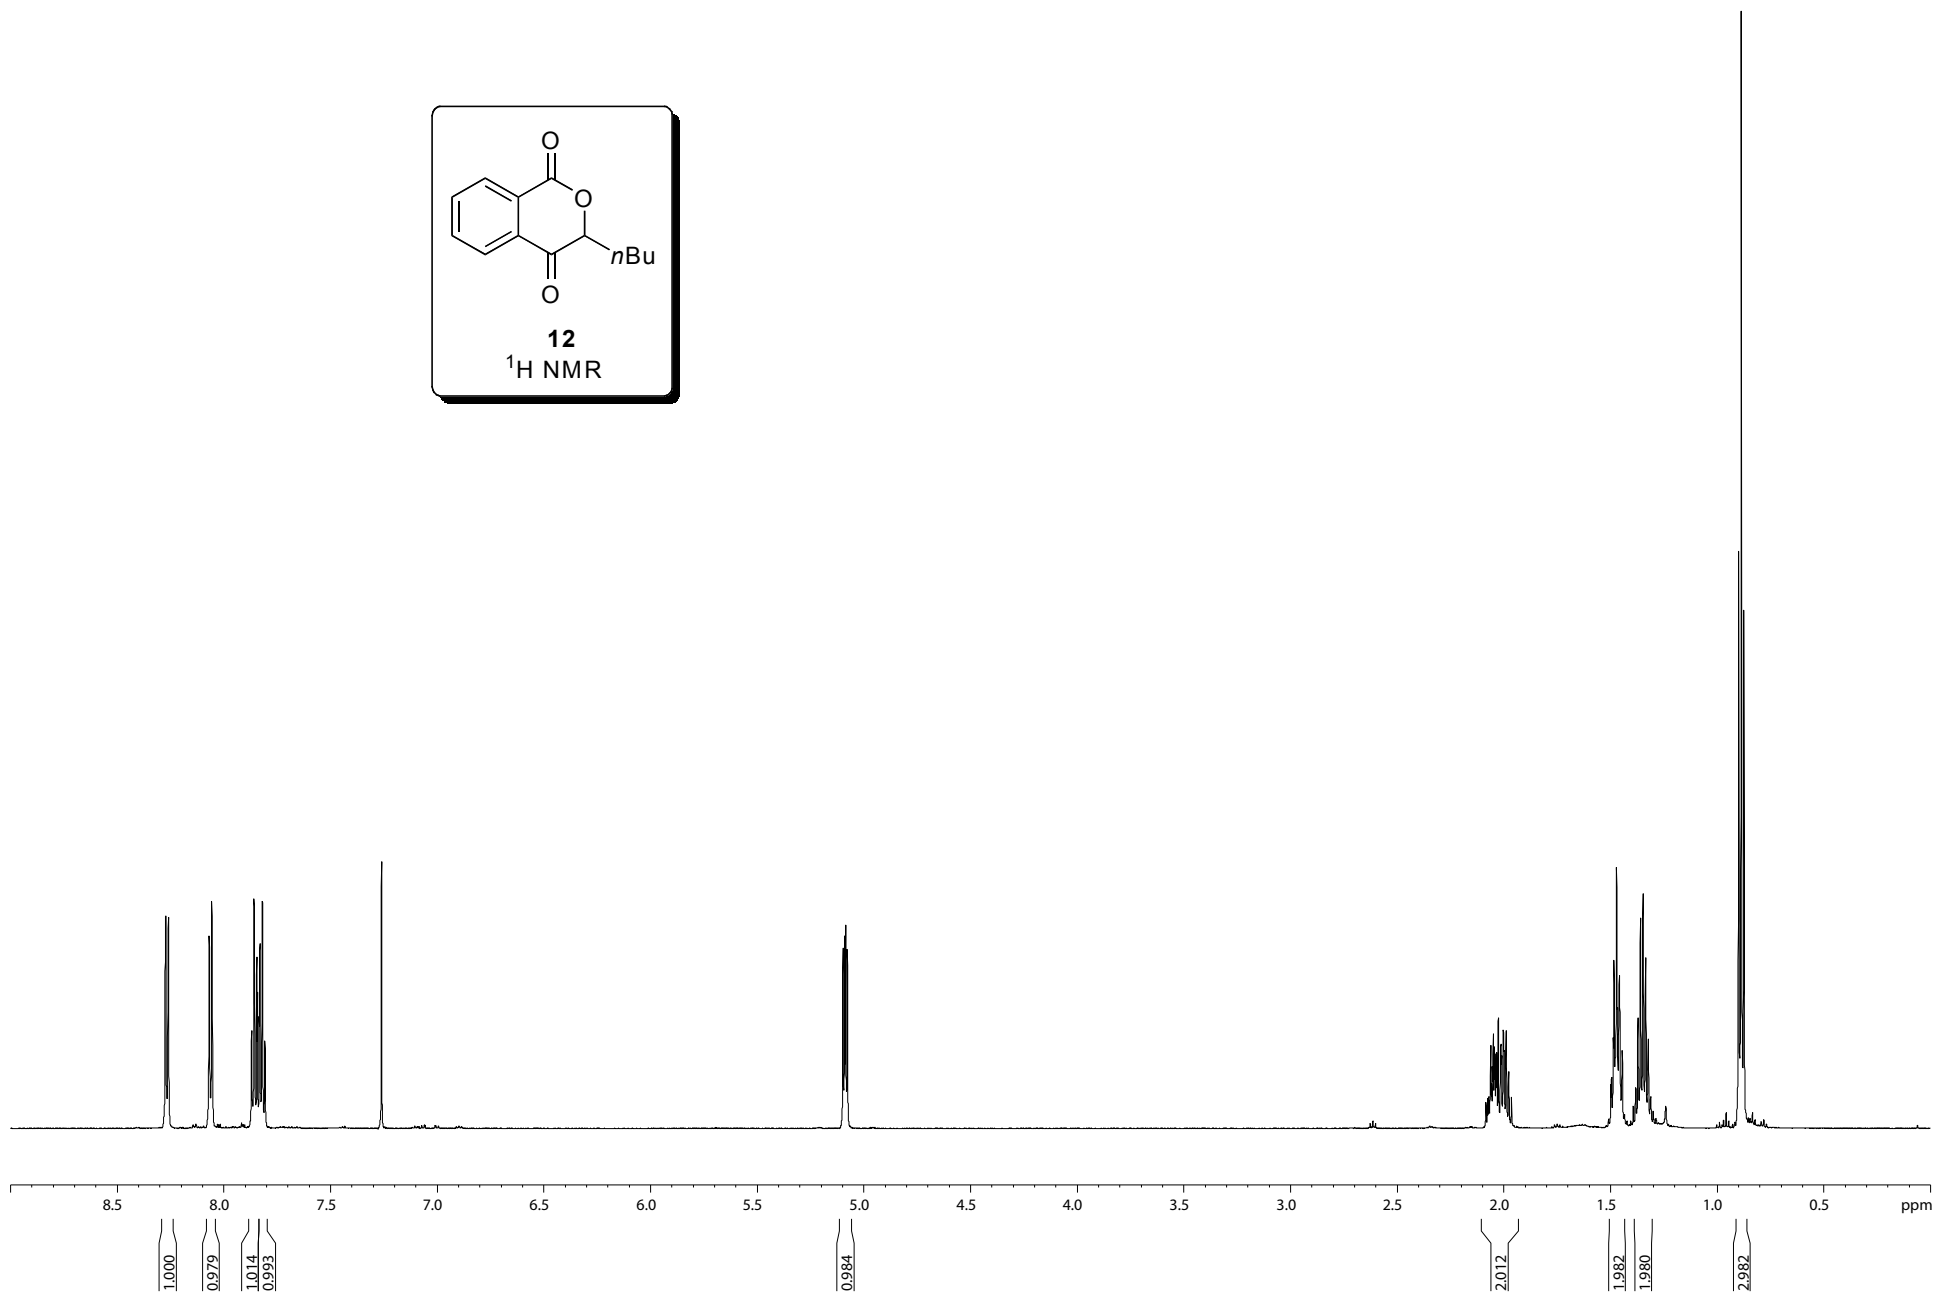



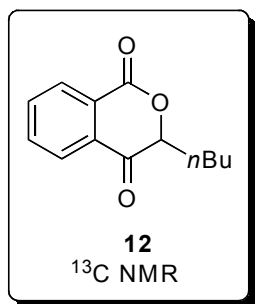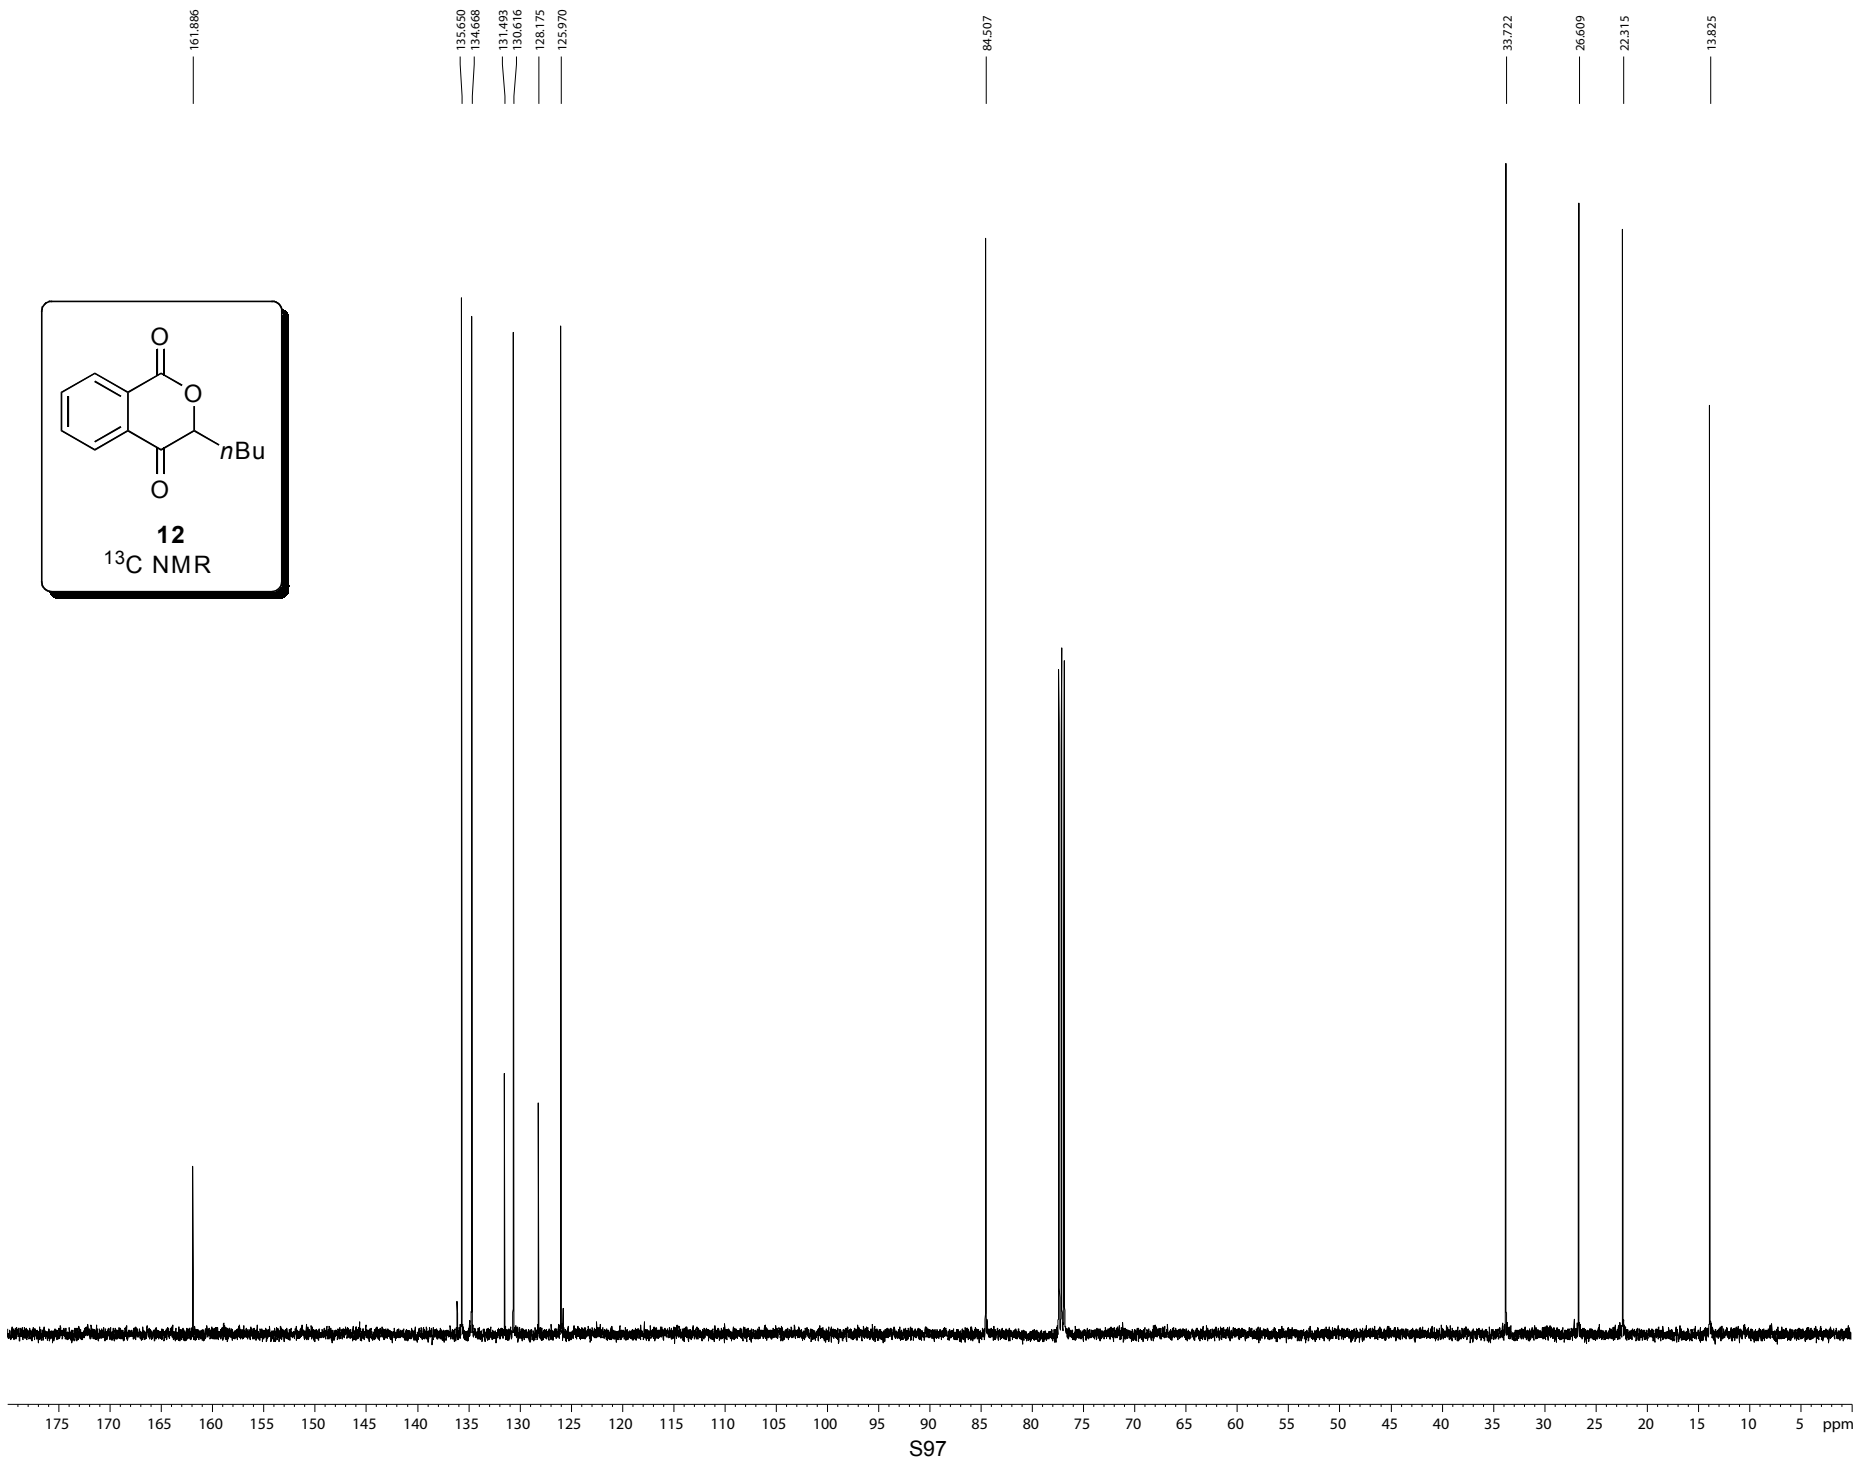

8.442  
8.426

7.709  
7.694  
7.678  
7.593  
7.578  
7.563  
7.288  
7.271  
7.260  
7.254  
7.243  
7.233  
7.215  
7.203  
7.189  
7.173  
7.156

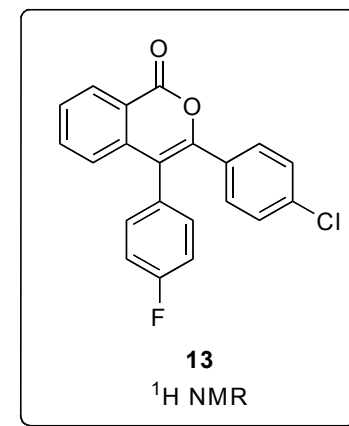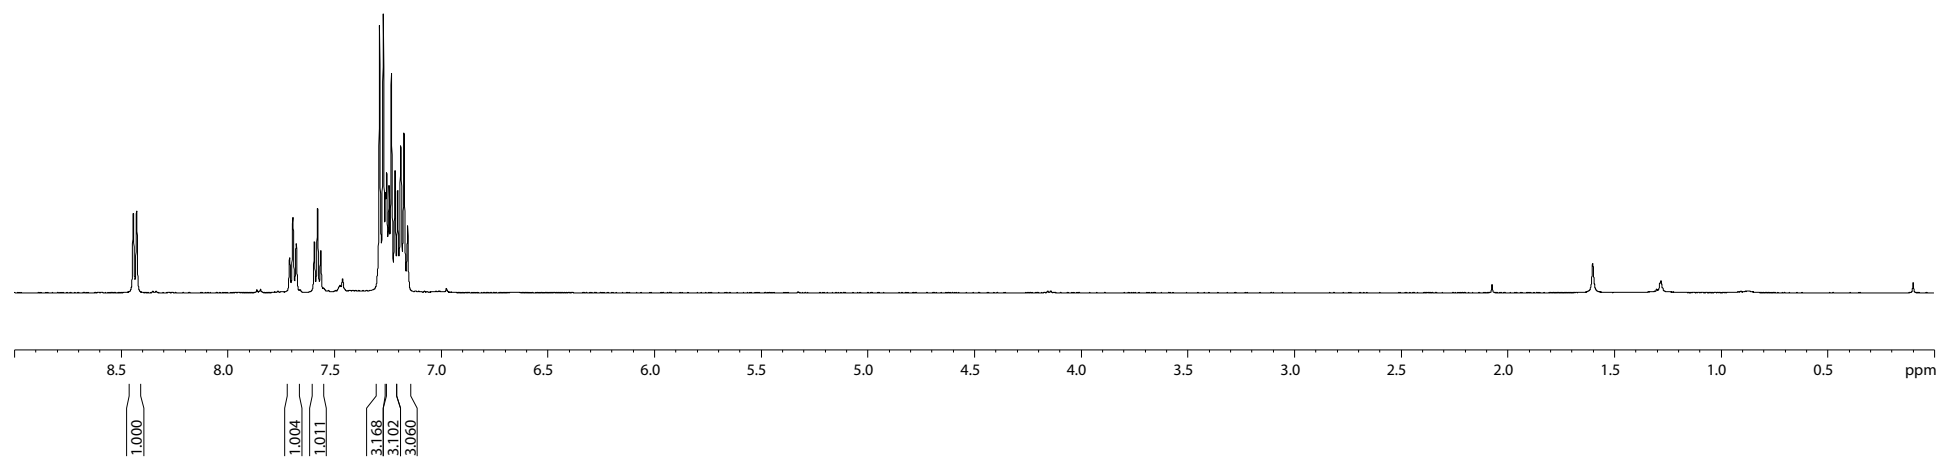

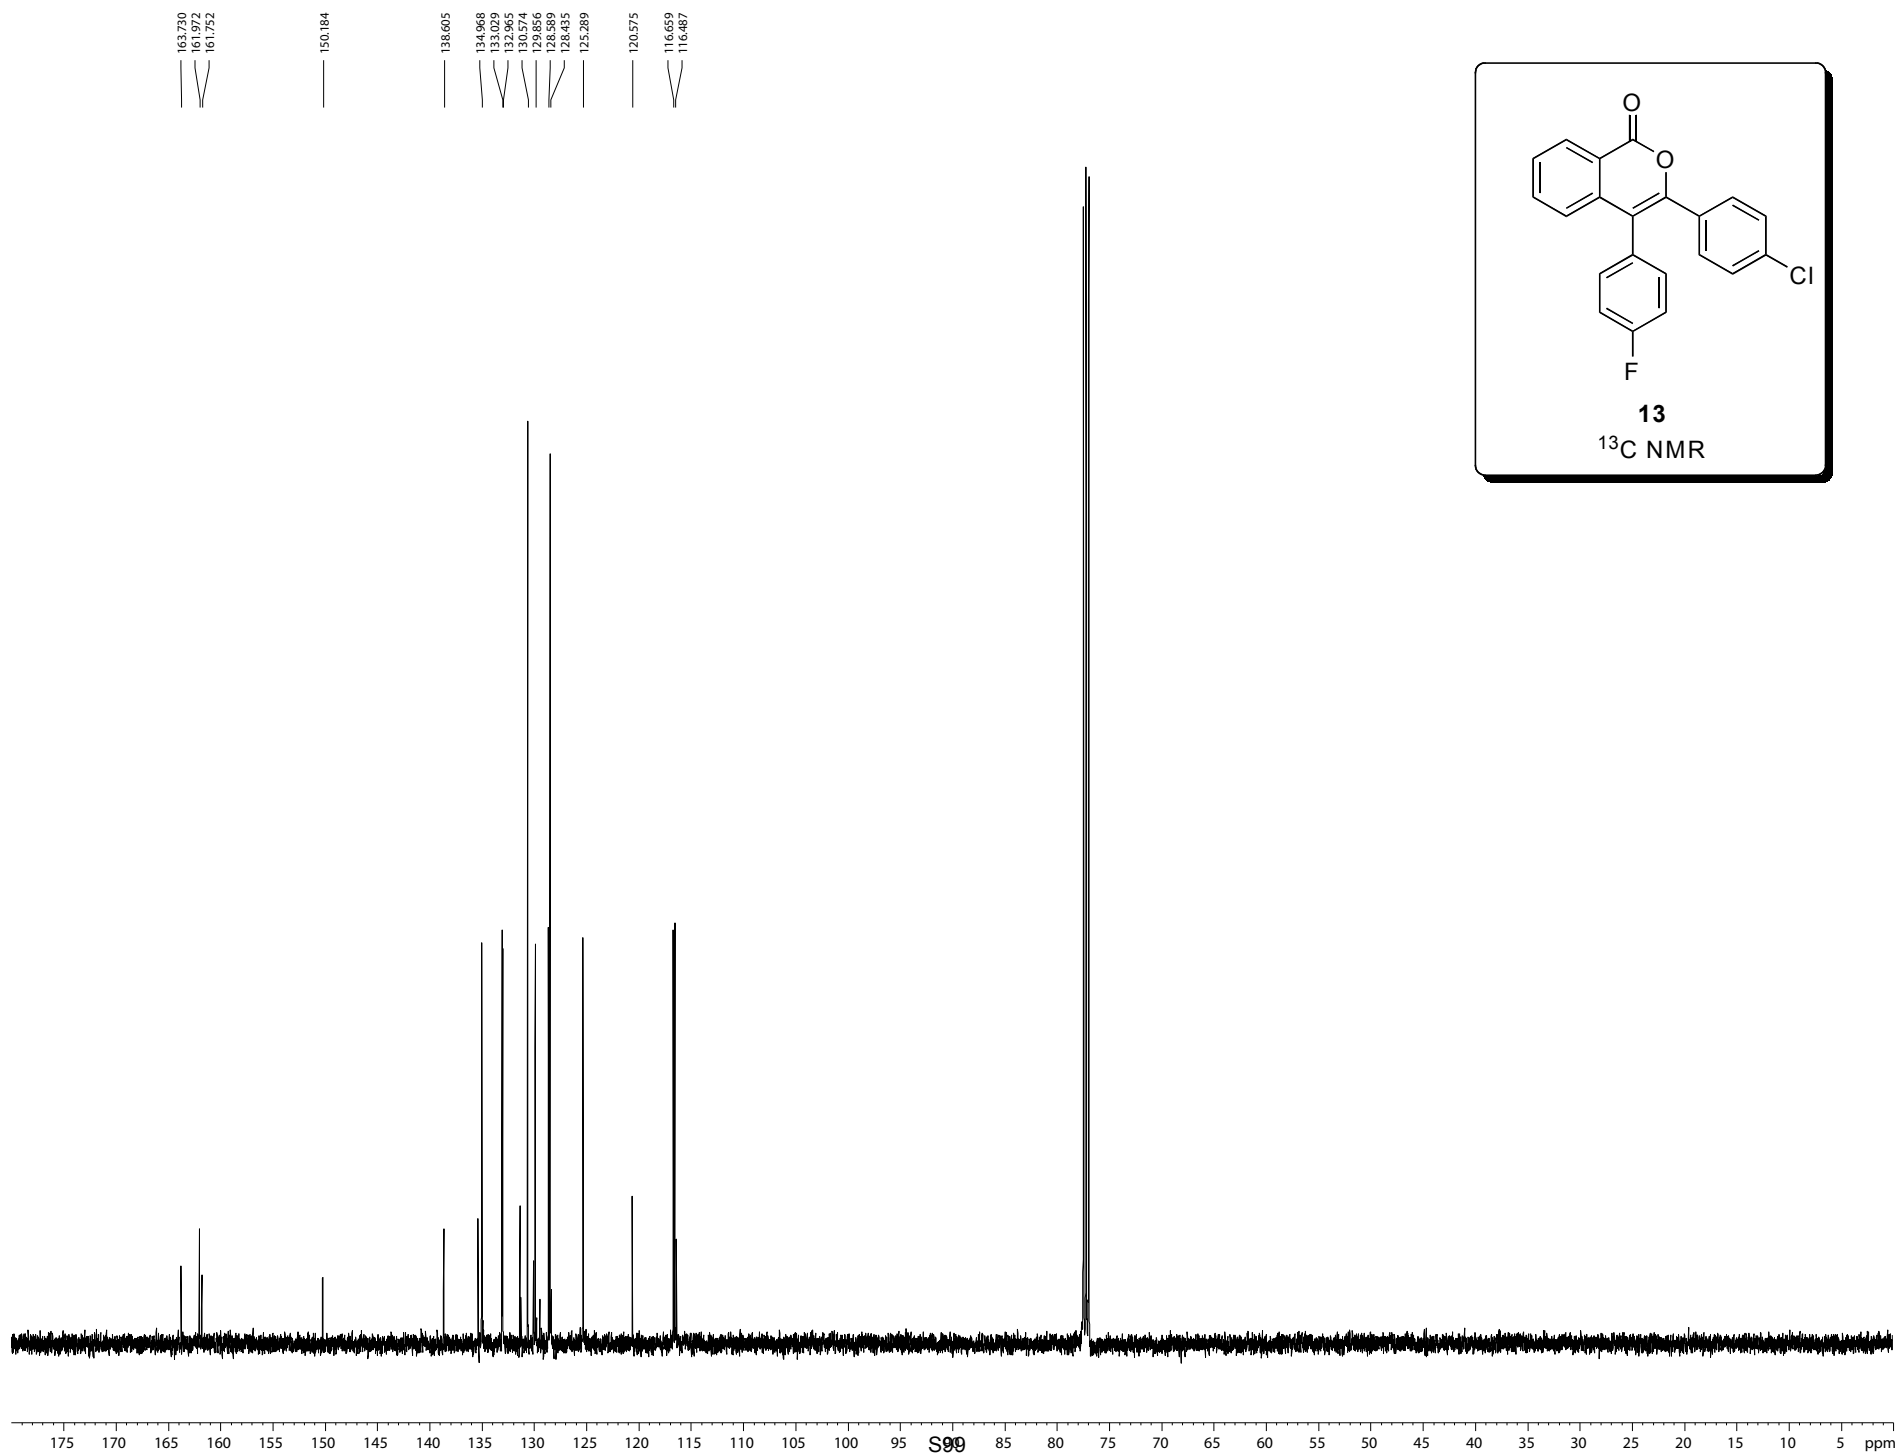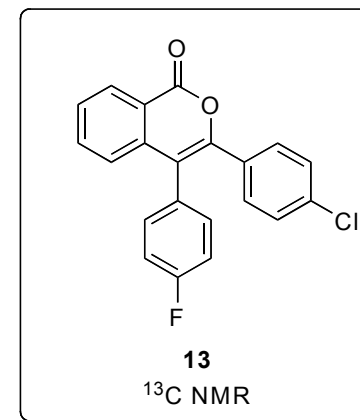

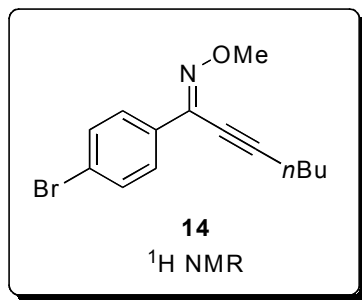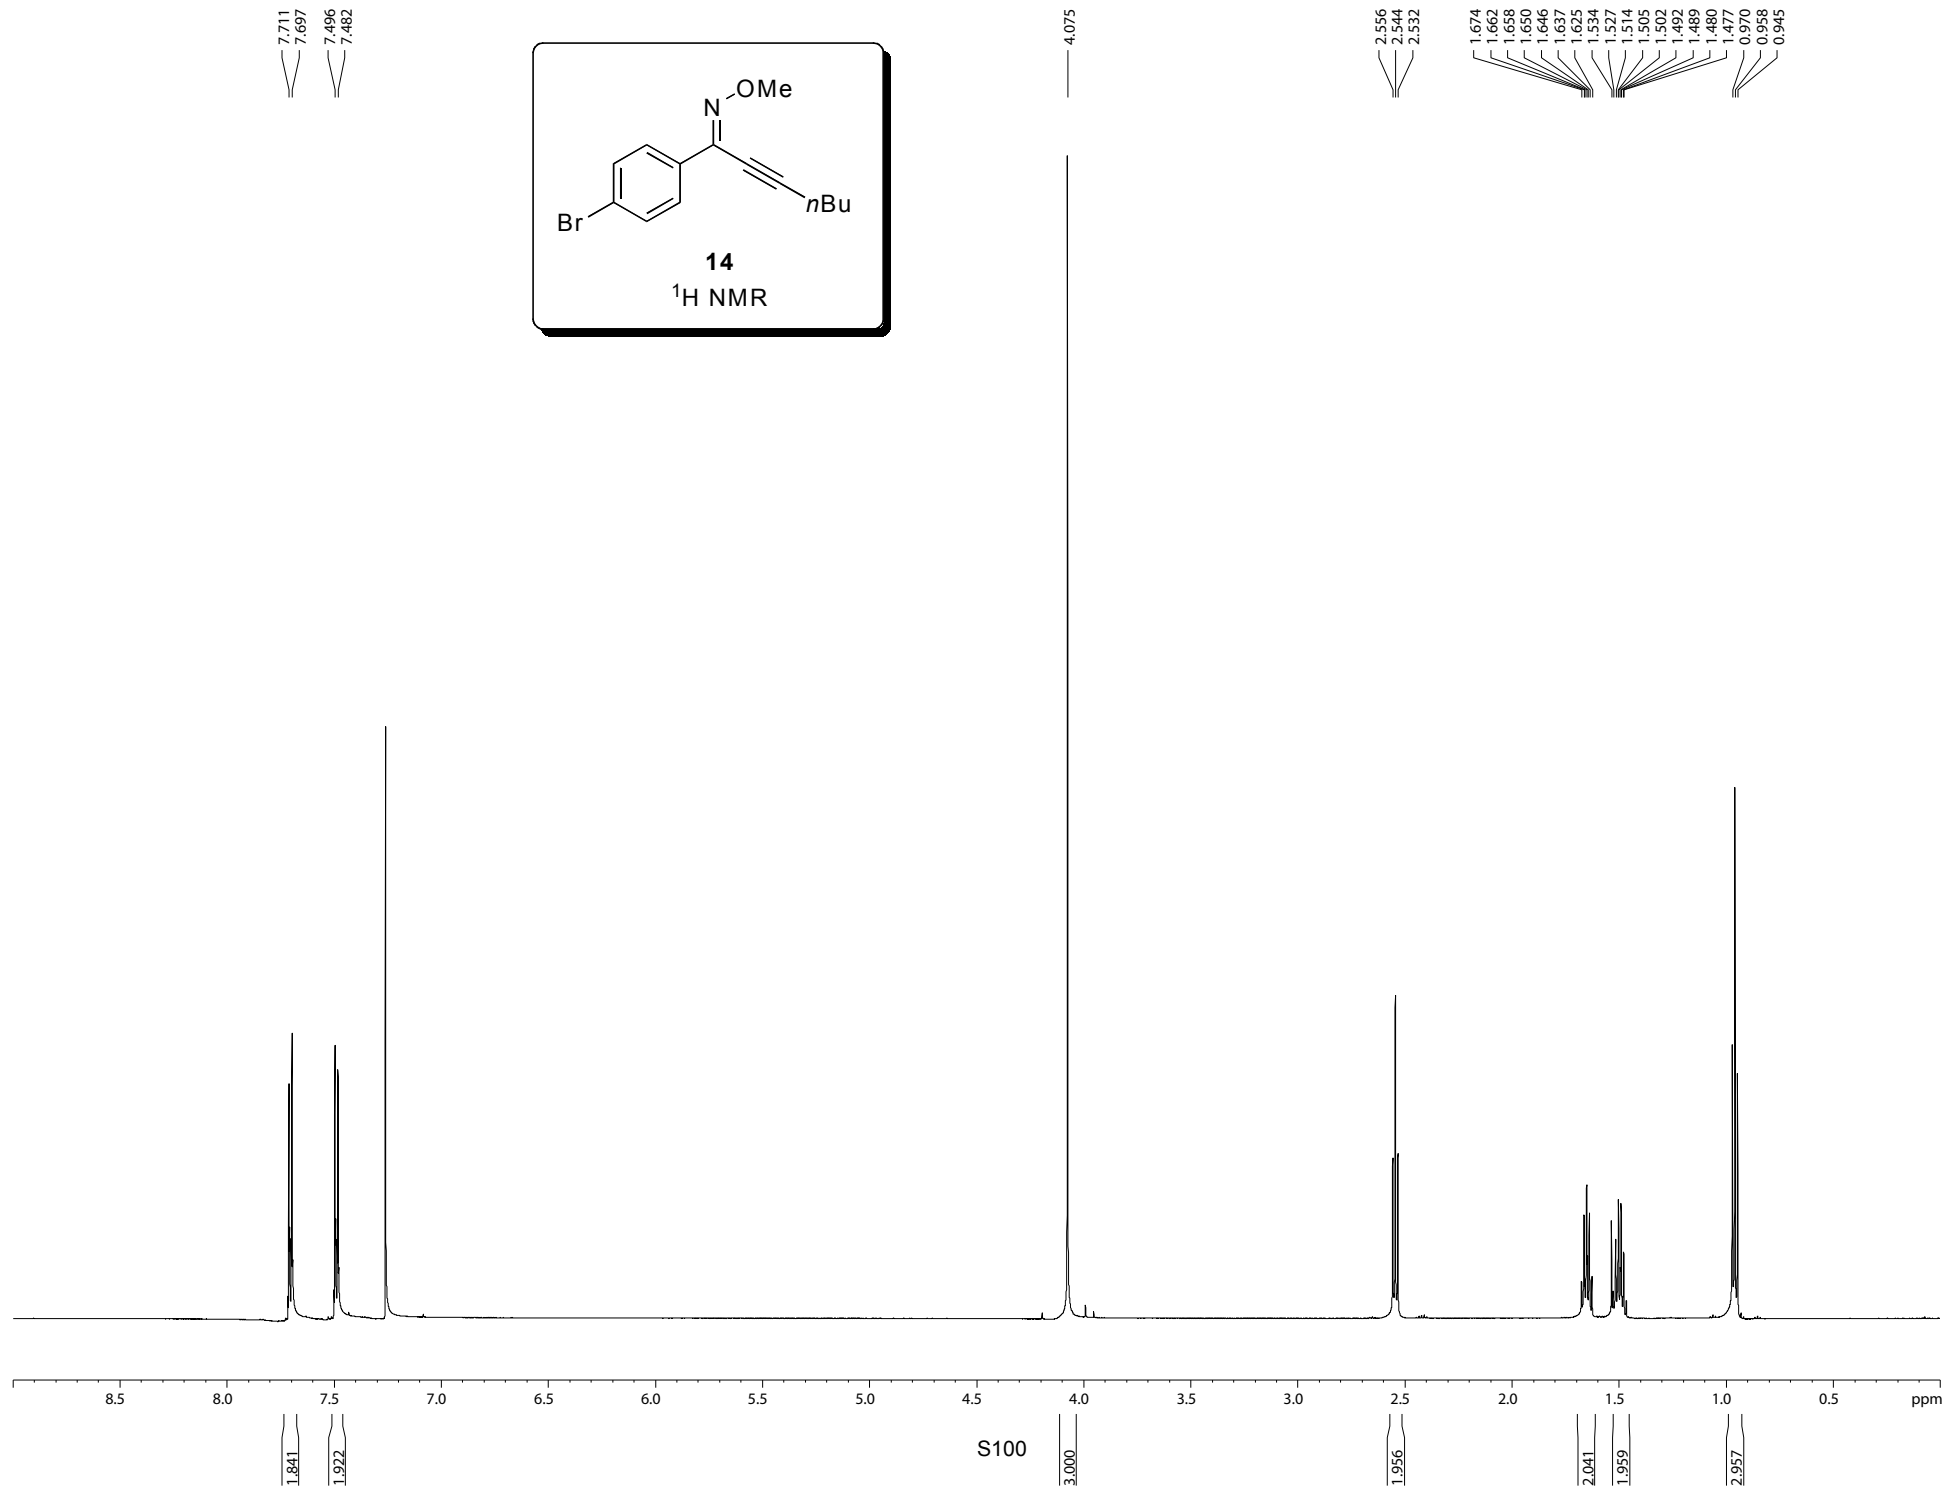

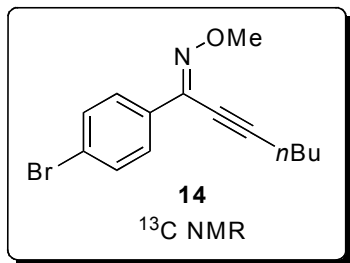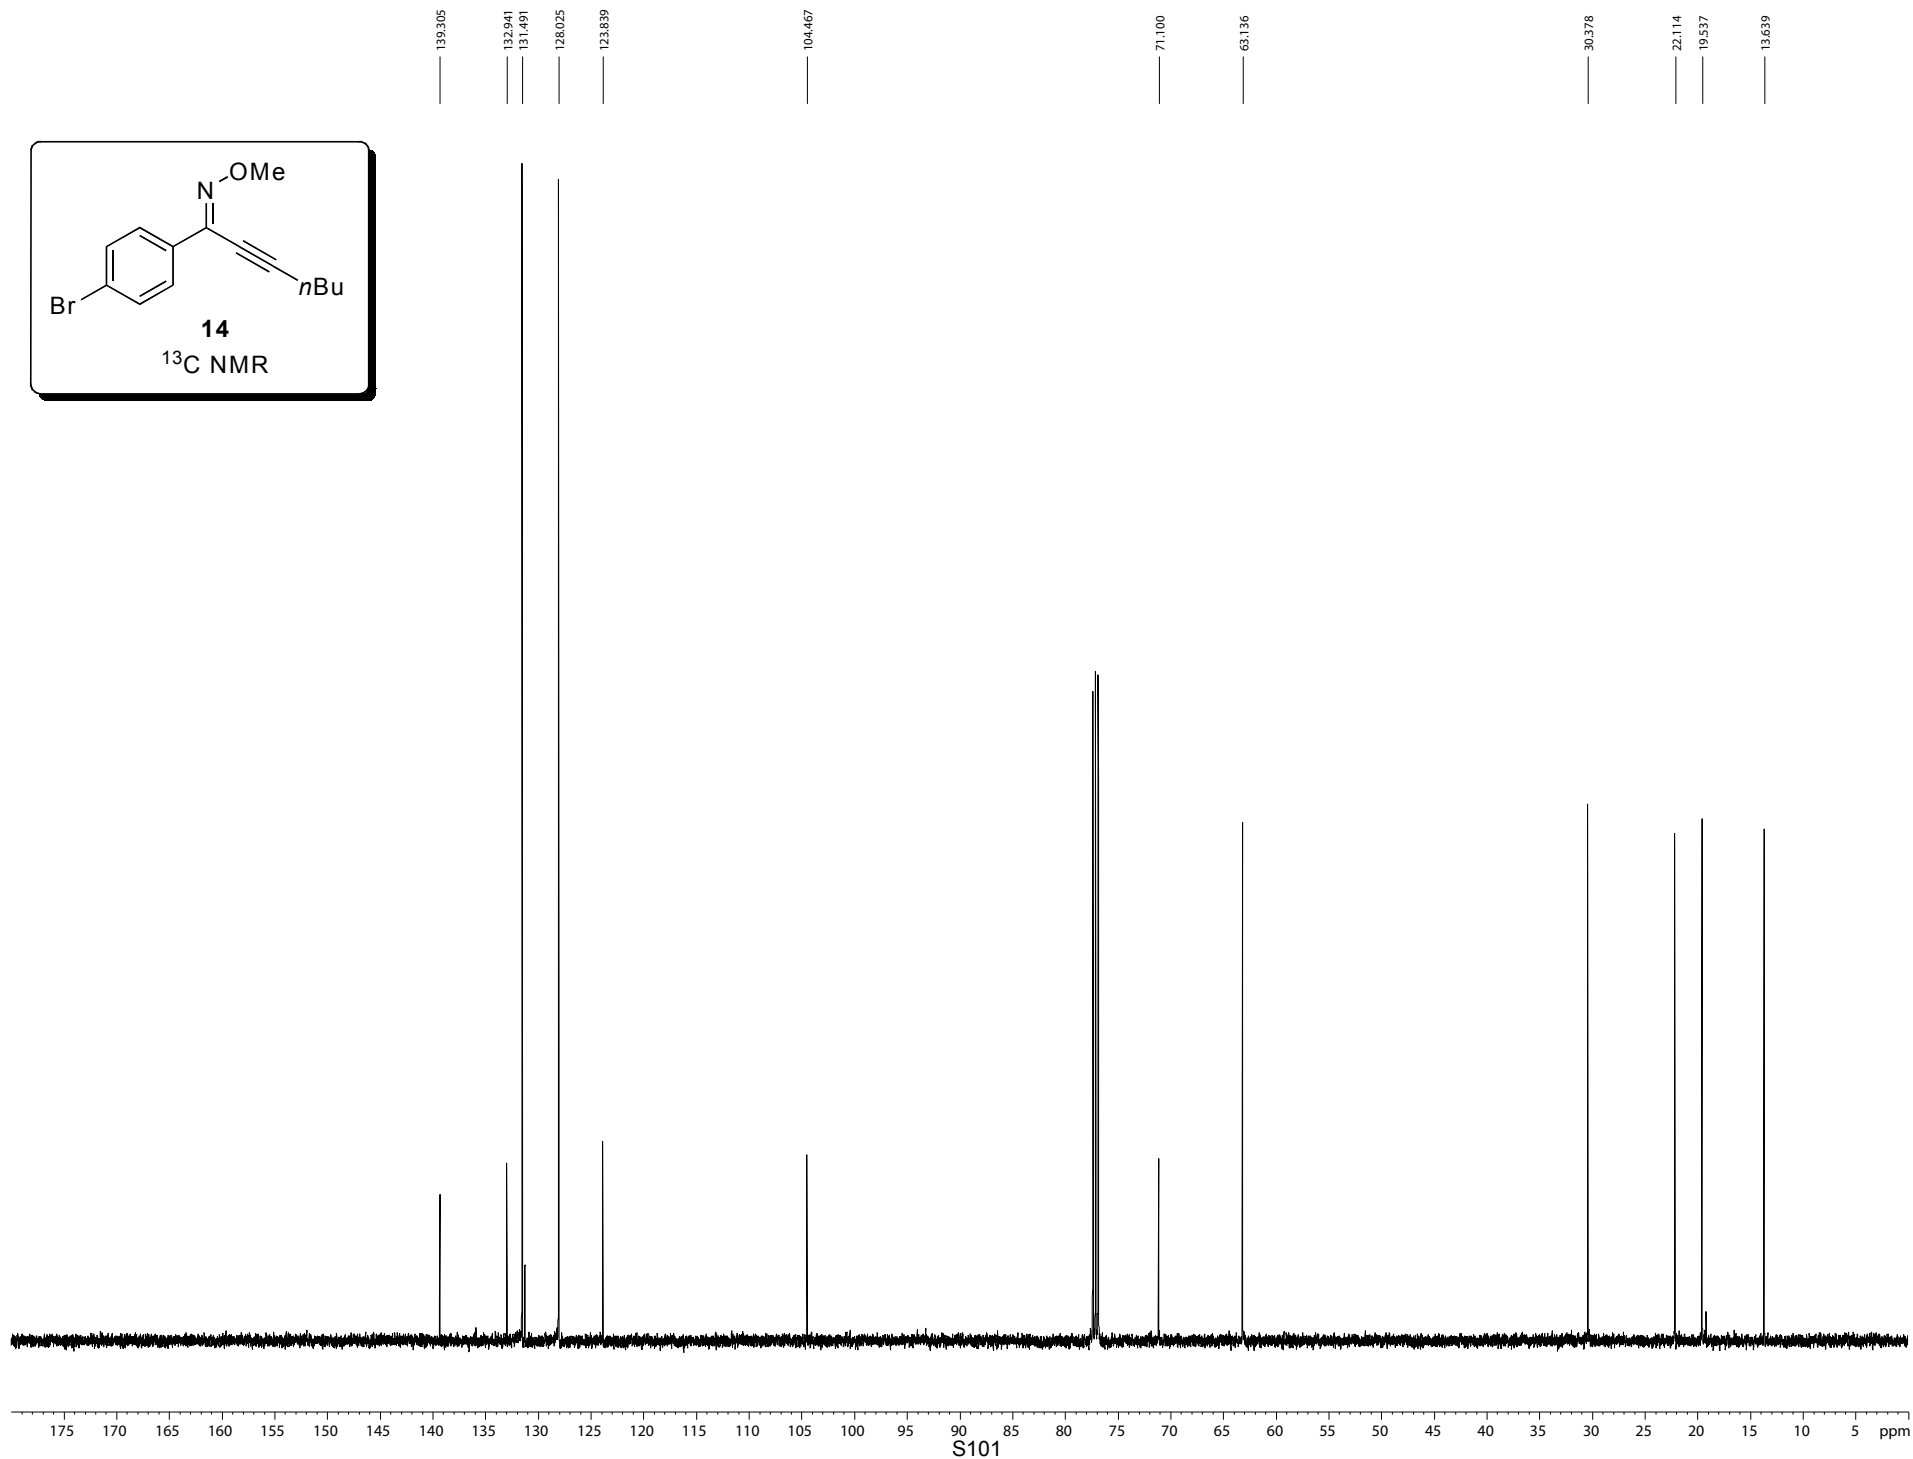

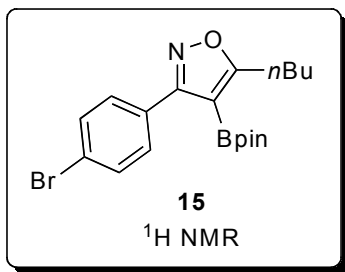

7.725  
7.708  
7.540  
7.523

3.021  
3.005  
2.990

1.730  
1.715  
1.700

1.290

0.959  
0.944  
0.930

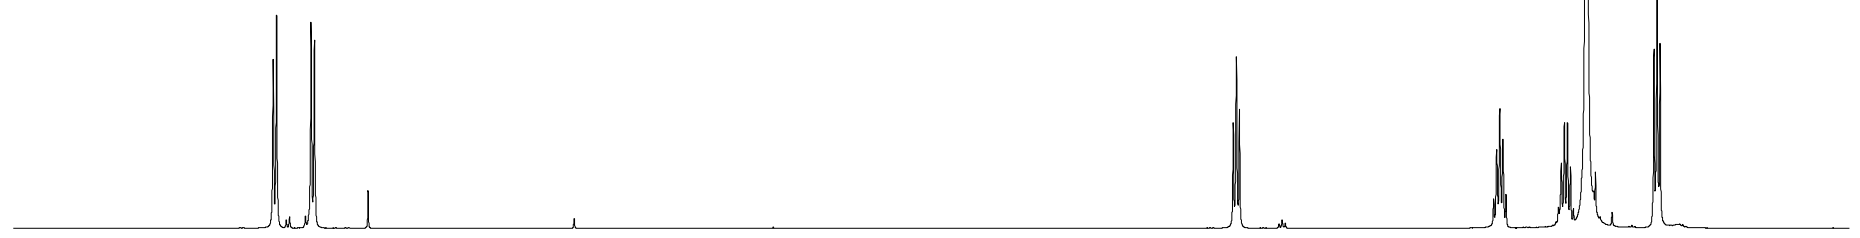

1.000  
1.029

1.002

1.063

1.140  
5.797

1.580

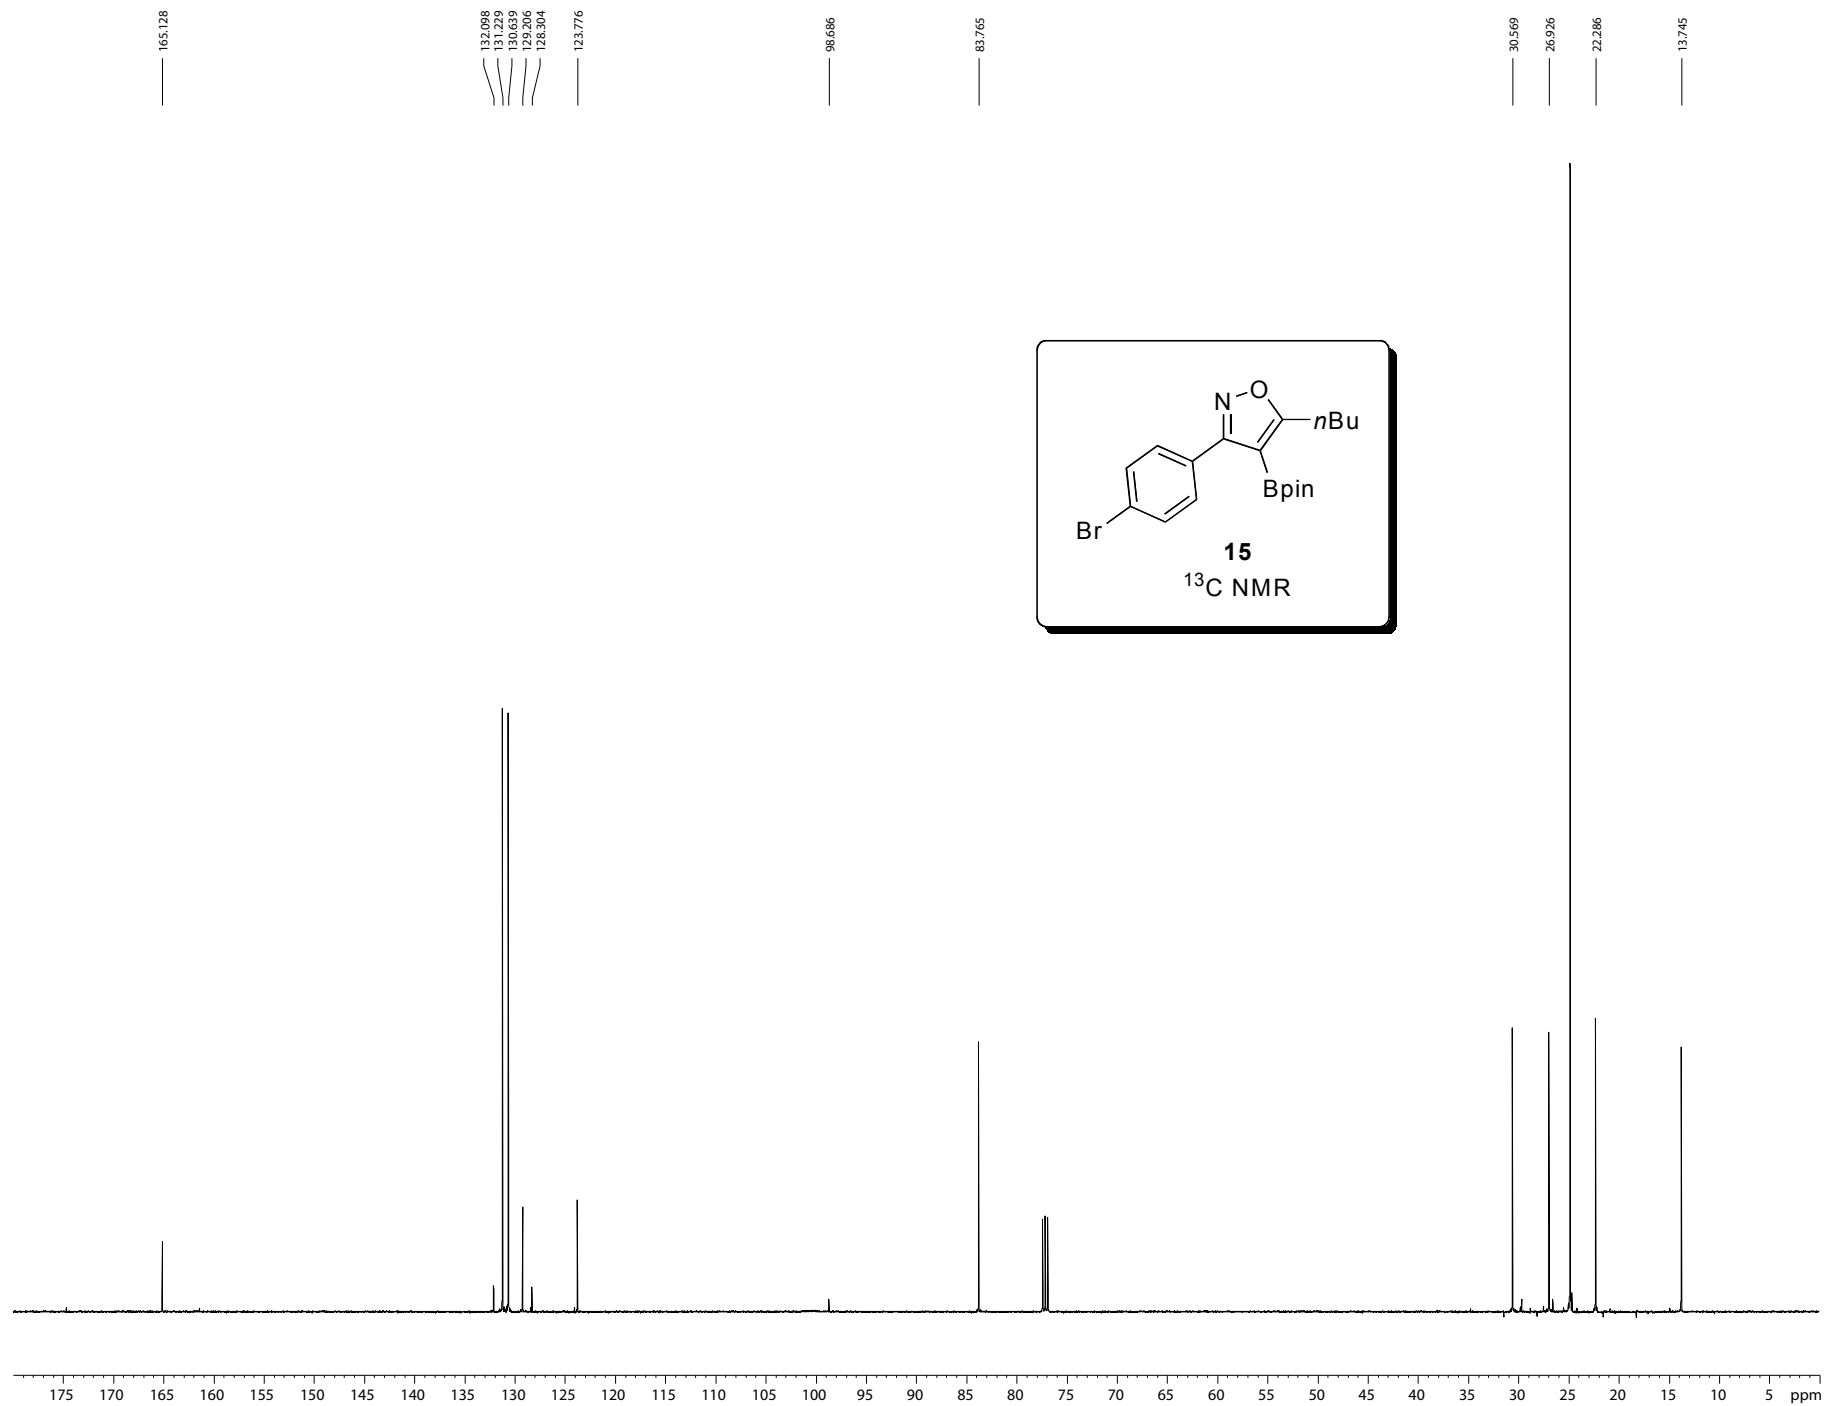

29.903

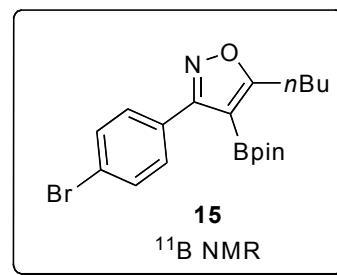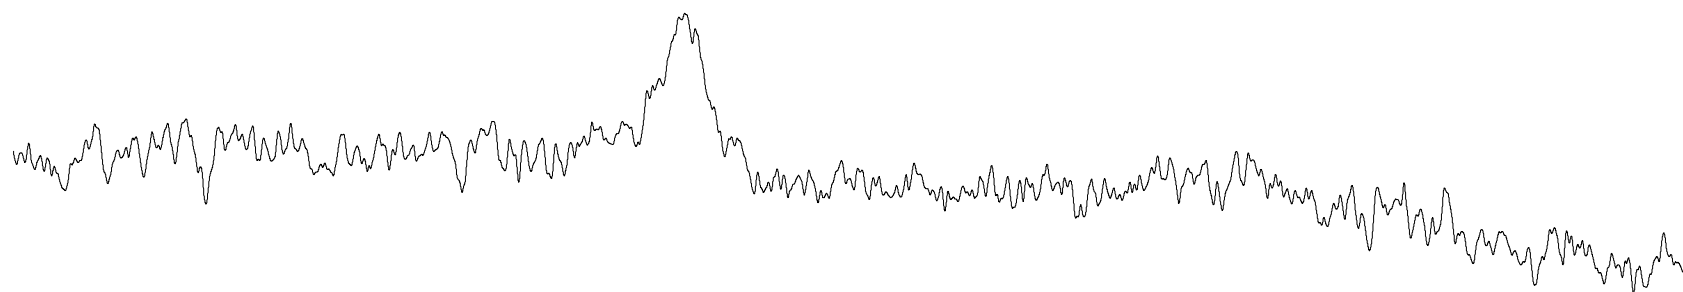

45

40

35

30

25

20

15

10

5

ppm

S104



8.368  
8.355  
7.859  
7.741  
7.704  
7.702  
7.691  
7.689  
7.517  
7.448  
7.435  
7.269  
6.718  
6.711  
6.708  
6.702  
6.695  
6.687  
6.682  
6.680  
6.678

4.448  
4.436

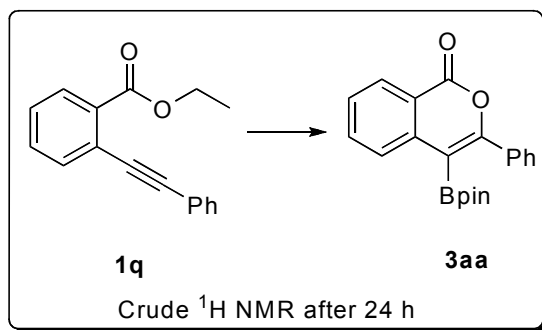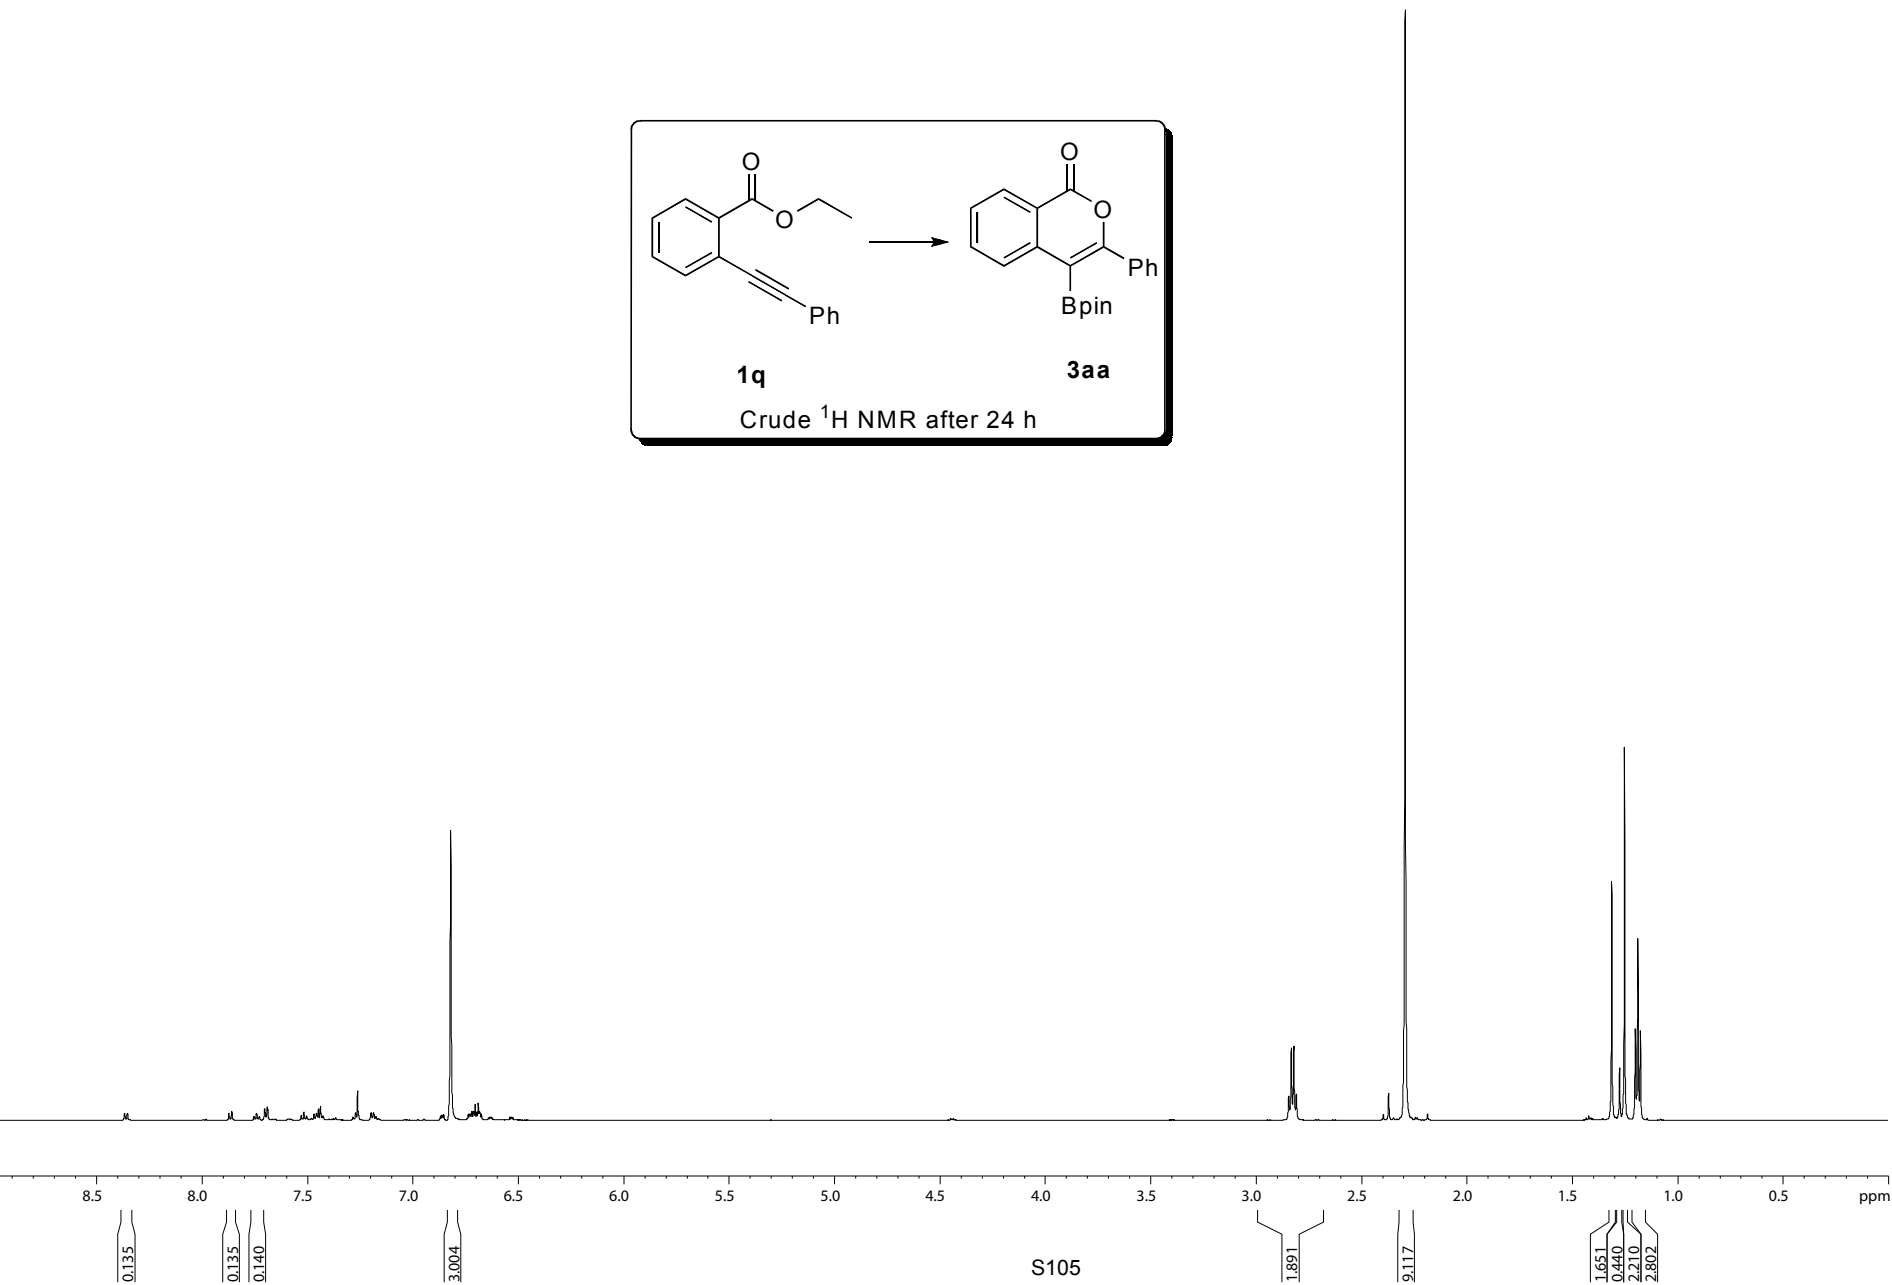

S105

8.362  
8.360  
8.349  
8.347

7.868  
7.855

7.263

6.812

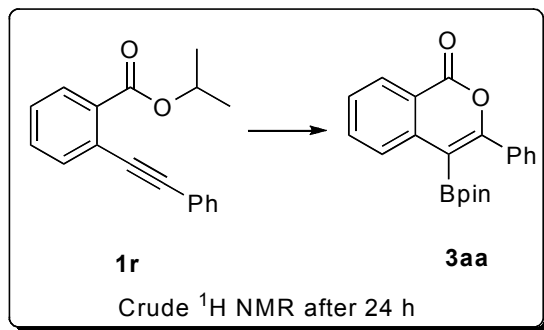

2.287

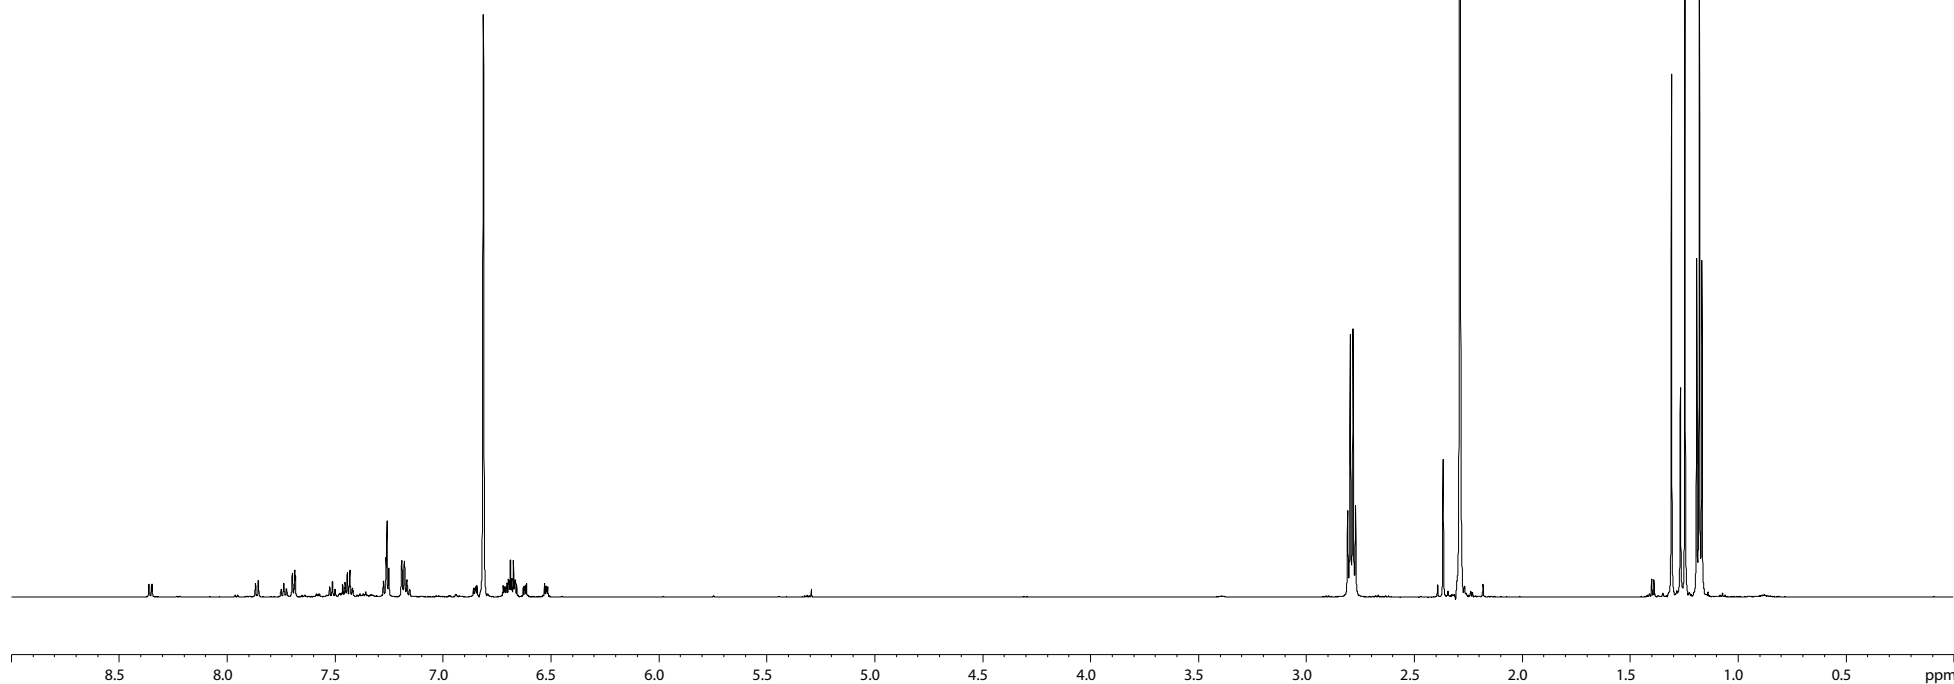

0.129

0.135

3.000

8.942

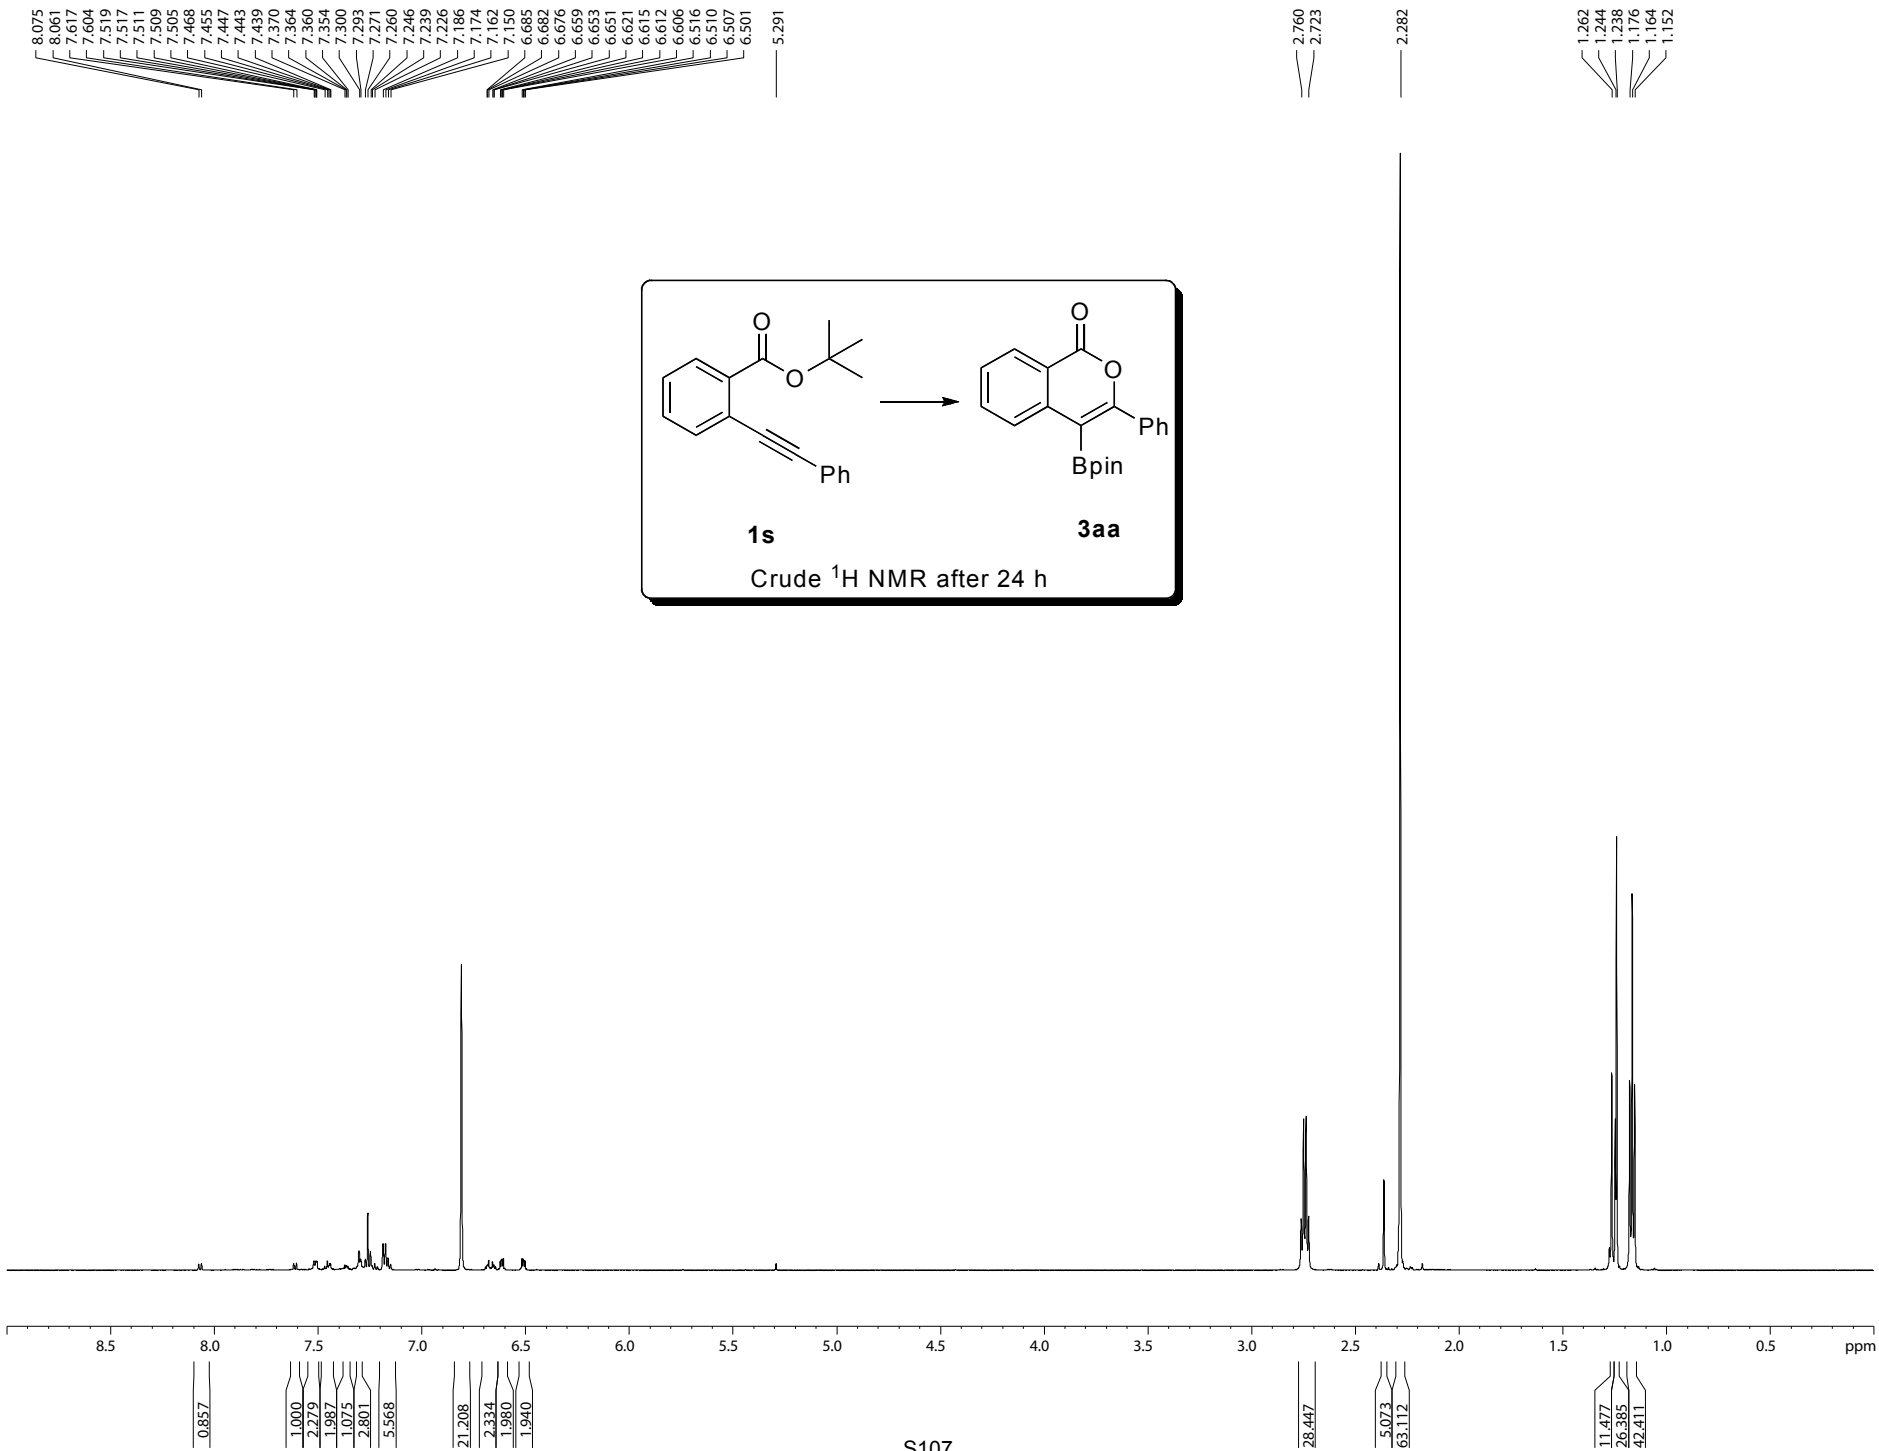

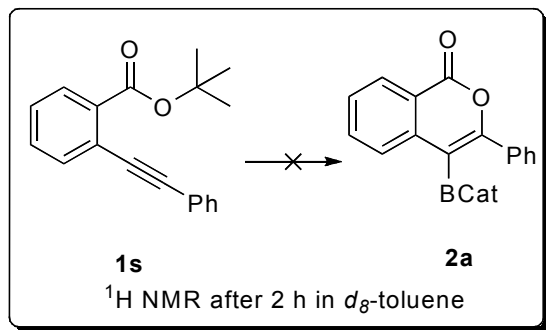

4.670

4.182  
4.172  
4.161

2.788  
2.776  
2.765

1.579  
1.480  
1.345  
1.209  
1.197

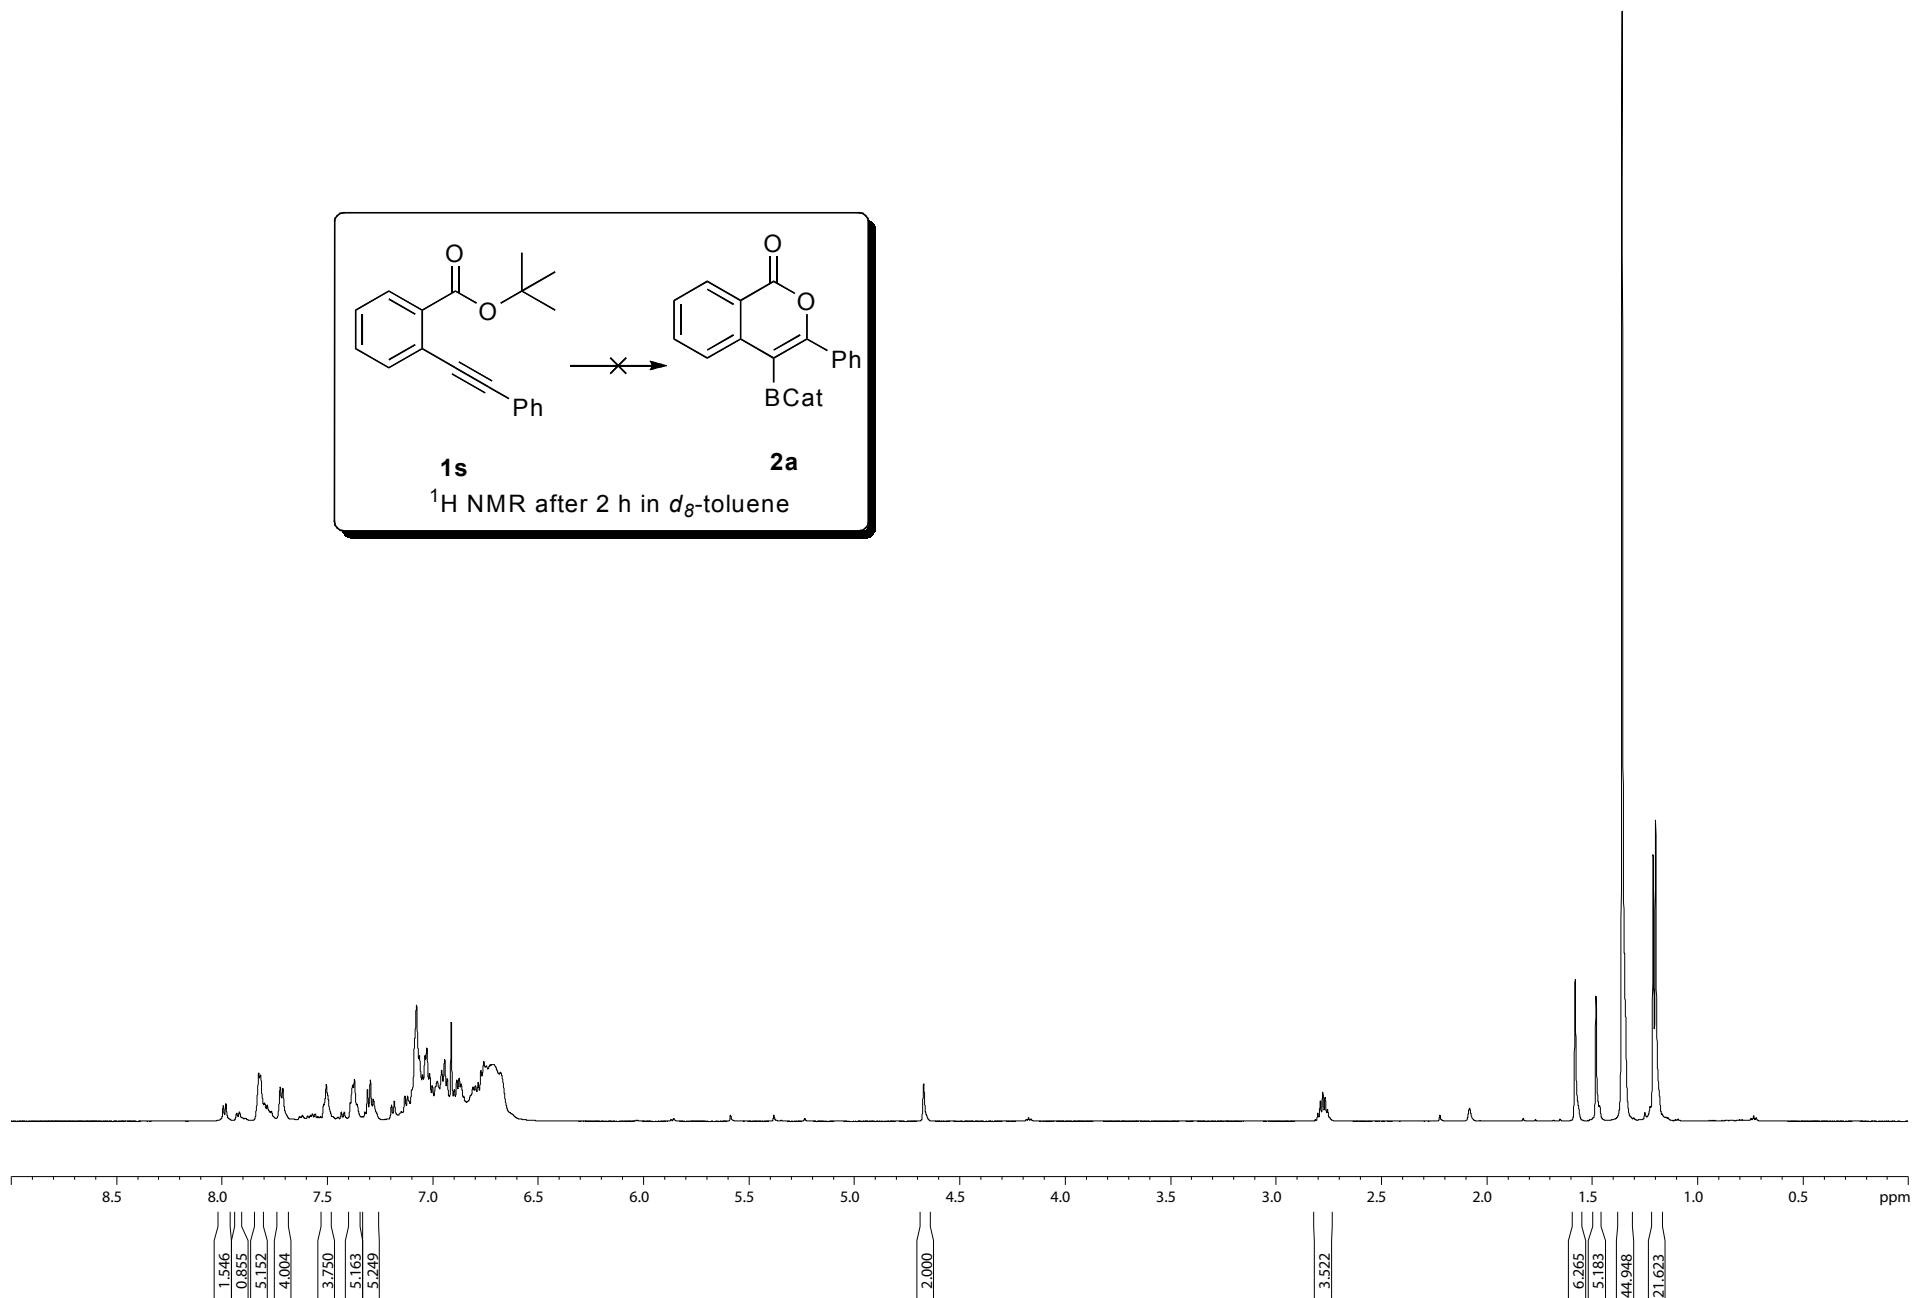

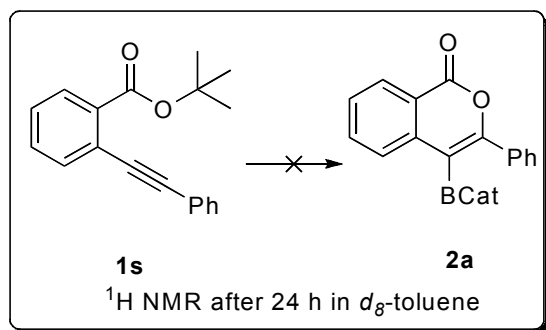

4.668  
4.667

4.186  
4.175  
4.167  
4.164

2.796  
2.784  
2.773  
2.761  
2.752  
2.750

2.083  
2.079  
2.076

1.578  
1.577  
1.358  
1.355  
1.208  
1.205  
1.197  
1.193

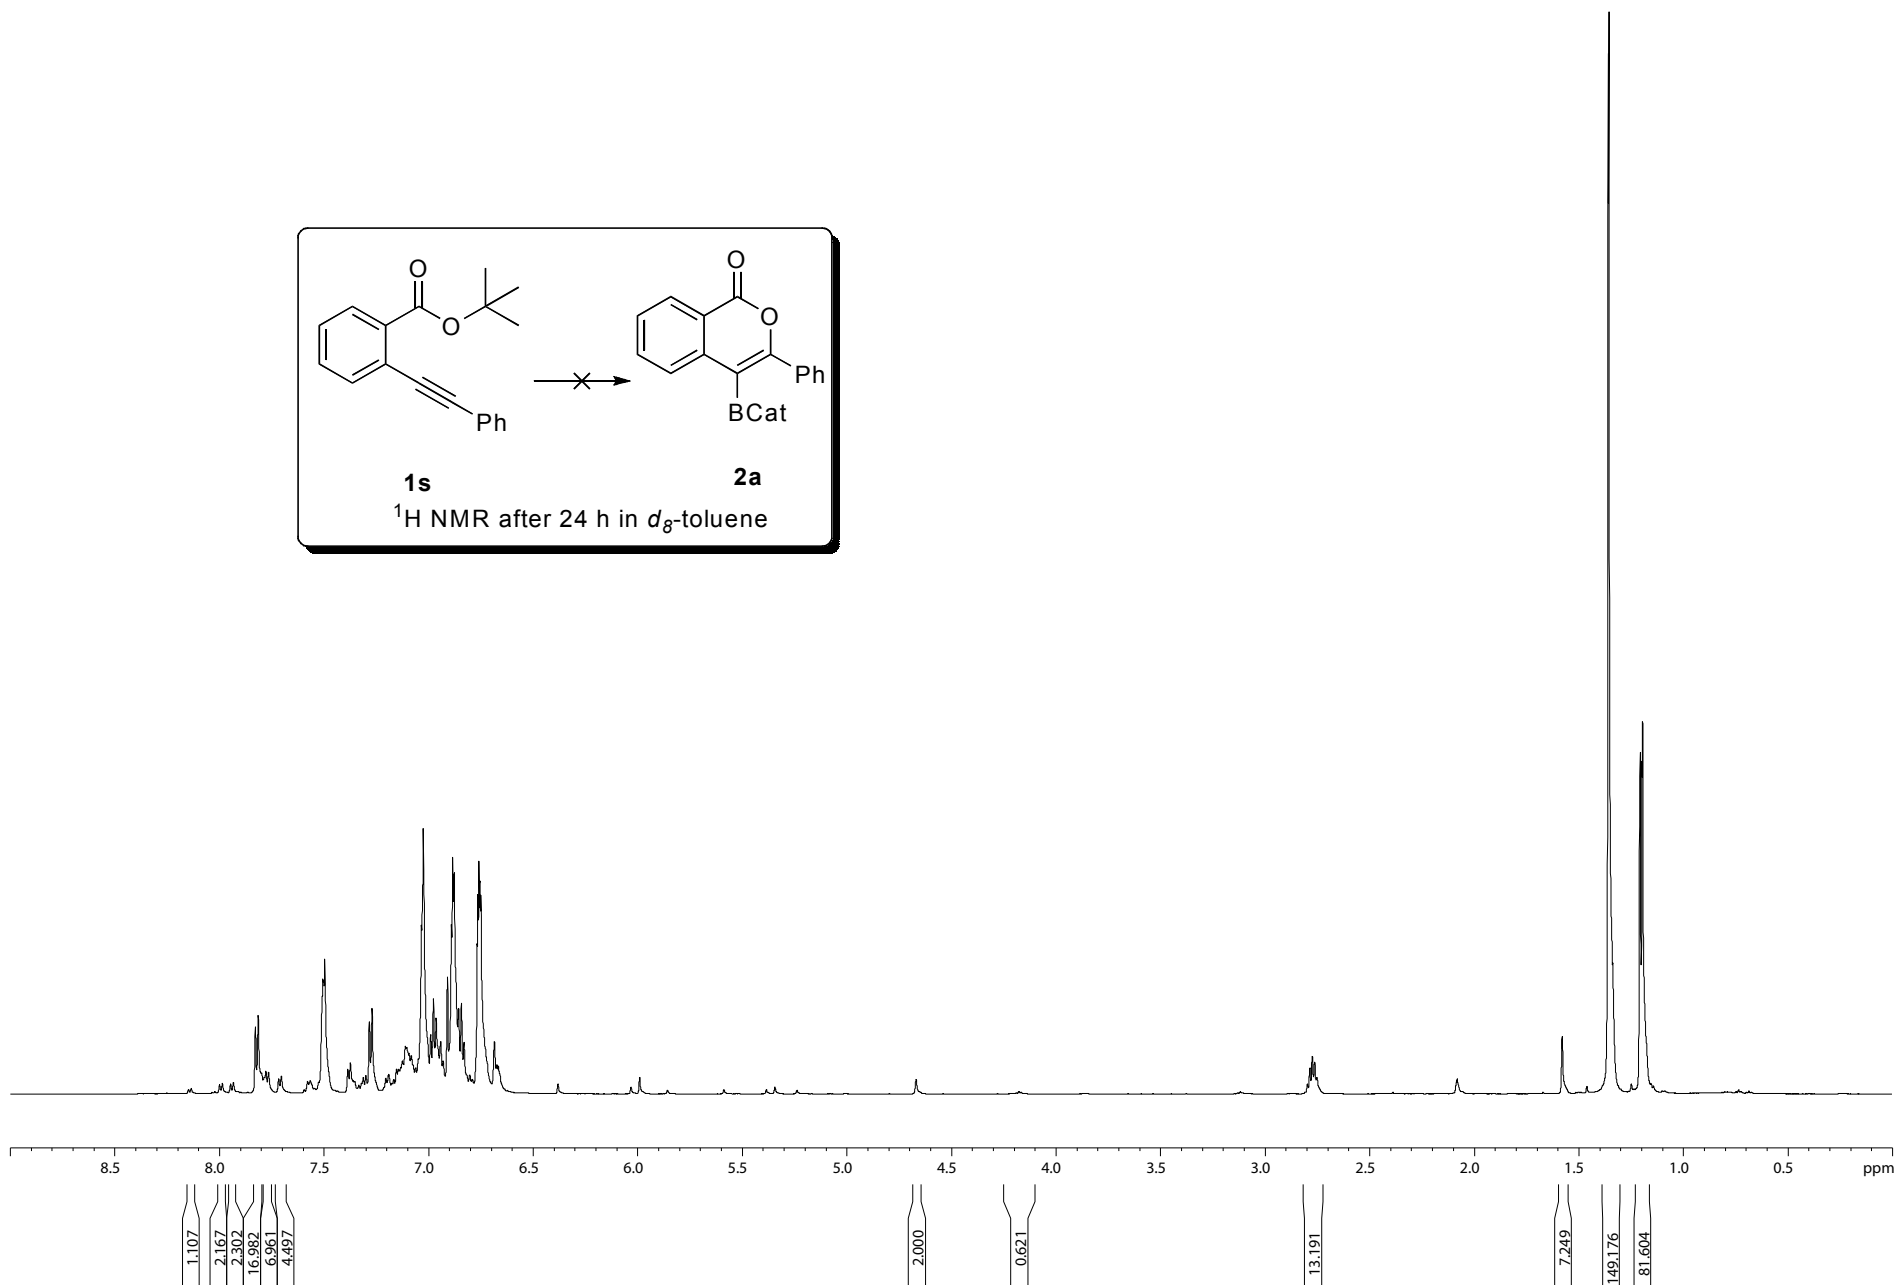

Supplement: ja5b12989_si_001.pdf [file ja5b12989_si_001.pdf]
